# Supplementary material
Source: Research Square preprint supplement (doi:10.21203/rs.3.rs-9531266/v1)
Supplement: Supplementary file 1 [file 247497ce68de290afc1aaa69.xlsx]

## Sheet: All genes Untreated vs IFNG
Symbol	ExpMean	Exp Unstimulated	Exp IFN	log2FC	lfcSE	Stat	p-value	padj
GBP1	487.481	6.7484	968.215	6.96677	0.236186	31.0051	4.59814e-211	1.18747e-206
CD74	243.931	2.26532	485.597	7.21936	0.298319	27.9941	1.91448e-172	2.47208e-168
GBP2	163.462	4.24712	322.677	5.94688	0.250381	24.9395	2.77283e-137	2.38694e-133
GBP5	54.4555	0.706466	108.204	5.99988	0.273957	24.3076	1.63029e-130	1.05256e-126
IDO1	359.146	0.56841	717.723	8.83999	0.515523	23.9584	7.55515e-127	3.90223e-123
GBP4	228.745	7.75613	449.733	5.68584	0.239369	23.3909	5.28899e-121	2.27647e-117
WARS	2313.26	132.927	4493.59	5.06867	0.228099	22.7788	7.43437e-115	2.74275e-111
C1S	41.7234	4.84573	78.6011	3.76733	0.267161	21.0039	6.04366e-98	1.95097e-94
CTSS	138.349	5.84772	270.851	5.31105	0.257712	19.9633	1.14823e-88	3.29478e-85
HAPLN3	30.4025	1.4197	59.3852	4.64129	0.322928	18.6643	9.66333e-78	2.49556e-74
AC010970.1	545.806	1085.35	6.26487	-7.22433	0.403872	-18.0965	3.39511e-73	7.97078e-70
C1R	44.5065	4.66953	84.3434	3.91198	0.254641	18.0182	1.40312e-72	3.01963e-69
TRIM22	185.325	19.2711	351.379	4.11963	0.228998	17.5738	3.90992e-69	7.76721e-66
MTRNR2L12	67.3728	134.427	0.319007	-6.68191	0.494872	-17.2761	7.12409e-67	1.31414e-63
APOL1	68.8171	7.2141	130.42	3.99994	0.248439	16.6894	1.56649e-62	2.69697e-59
IRF1	437.929	47.6133	828.244	4.09238	0.247475	16.3623	3.5539e-60	5.73621e-57
OAS2	95.5653	16.1445	174.986	3.35964	0.231043	16.2742	1.50524e-59	2.28664e-56
CIITA	56.9832	4.31393	109.652	4.38011	0.242193	16.2551	2.05614e-59	2.94998e-56
APOL3	73.8238	11.8671	135.78	3.4101	0.250272	16.0994	2.57694e-58	3.45383e-55
SECTM1	178.789	20.3188	337.26	3.98794	0.251598	16.0971	2.6748e-58	3.45383e-55
SP110	99.8389	16.7659	182.912	3.37183	0.230329	15.9337	3.69766e-57	4.54725e-54
OR2I1P	4.71255	0.280768	9.14434	2.98559	0.33932	15.6833	1.96618e-55	2.30803e-52
BATF2	14.2728	0.114409	28.4311	4.72299	0.528568	15.475	5.11641e-54	5.74483e-51
EPSTI1	129.853	18.1658	241.54	3.66162	0.230534	15.1901	4.11207e-52	4.42476e-49
TAP1	103.58	14.4672	192.692	3.64648	0.255152	15.0684	2.61206e-51	2.69826e-48
IL32	35.3189	1.23432	69.4035	4.97774	0.365119	14.9314	2.05765e-50	2.0438e-47
AC005515.1	47.7614	0.0791325	95.4437	6.48174	0.642704	14.8361	8.56298e-50	8.19033e-47
STAT1	378.043	71.3528	684.734	3.24453	0.22608	14.5081	1.07612e-47	9.92528e-45
IL18BP	43.2733	3.86354	82.683	4.10486	0.288259	14.2754	3.11506e-46	2.77401e-43
ICAM1	34.8728	7.49828	62.2473	2.89576	0.238312	14.2077	8.21226e-46	7.06938e-43
LAP3	156.55	31.645	281.454	3.11309	0.230412	14.081	4.96743e-45	4.13819e-42
UBD	158.215	0.087729	316.341	8.18857	0.87007	13.865	1.03291e-43	8.33591e-41
MX1	75.2502	26.5428	123.957	2.18169	0.23376	13.6141	3.30087e-42	2.50721e-39
HLA-DMA	24.1558	3.95896	44.3526	3.19308	0.312974	13.3431	1.30016e-40	9.59335e-38
CCL2	142.488	22.8906	262.084	3.46101	0.277472	13.3016	2.26469e-40	1.6246e-37
UBE2L6	357.212	87.51	626.914	2.82665	0.22255	13.085	4.01262e-39	2.8007e-36
APOL2	111.086	22.1249	200.048	3.12002	0.252622	12.9453	2.49683e-38	1.69686e-35
IFI35	90.4	10.9601	169.84	3.83634	0.334234	12.8924	4.9669e-38	3.28898e-35
RSAD2	16.3984	3.8289	28.9678	2.63365	0.273294	12.7352	3.76927e-37	2.43353e-34
ETV7	28.1254	6.53972	49.7112	2.74972	0.25911	12.4152	2.16122e-35	1.36131e-32
RNF213	481.213	137.909	824.518	2.57116	0.228995	12.1273	7.57273e-34	4.65633e-31
CMPK2	43.6689	8.49983	78.838	3.0711	0.268439	11.774	5.31632e-32	3.19288e-29
IFI6	25.7955	3.71197	47.879	3.37481	0.330148	11.6863	1.49735e-31	8.78845e-29
ACSL5	10.1651	2.31318	18.0171	2.521	0.30055	11.4908	1.46695e-30	8.41868e-28
PARP14	146.499	34.4643	258.534	2.87149	0.248418	11.4409	2.61135e-30	1.46604e-27
CSF1	15.4681	3.93498	27.0011	2.50437	0.268598	11.4075	3.8355e-30	2.10748e-27
SMTNL1	8.43185	0.932393	15.9313	3.13123	0.378184	11.2034	3.92377e-29	2.11107e-26
IFITM1	246.104	72.2378	419.97	2.52306	0.245181	11.1955	4.28931e-29	2.26064e-26
IFIT3	203.963	51.5336	356.392	2.76619	0.261698	11.0787	1.592e-28	8.22267e-26
HLA-DQB1	24.9385	6.07983	43.7972	2.66162	0.265729	11.076	1.64042e-28	8.30663e-26
CD274	14.3346	2.44552	26.2236	2.98206	0.334464	11.0659	1.8364e-28	9.1202e-26
HLA-DMB	10.9156	0.0937455	21.7374	4.37772	0.677466	11.0575	2.0153e-28	9.81983e-26
RARRES3	42.1331	7.04671	77.2195	3.28106	0.328304	10.8865	1.33613e-27	6.38991e-25
MMP13	6.87457	12.6104	1.13874	-2.66988	0.355886	-10.7896	3.85333e-27	1.80931e-24
BST2	18.8643	0.105787	37.6228	5.12631	0.799288	10.7486	6.01366e-27	2.77327e-24
GBP1P1	8.76762	0.991699	16.5435	3.13887	0.382483	10.6449	1.84103e-26	8.34117e-24
CXCL10	197.749	0	395.498	8.63117	1.48641	10.5744	3.91779e-26	1.74443e-23
IRF9	66.5138	17.8475	115.18	2.62392	0.254058	10.5513	5.0122e-26	2.1939e-23
SLC15A3	29.8459	7.25287	52.4389	2.69492	0.289683	10.5347	5.9784e-26	2.5732e-23
PSMB9	173.179	54.3901	291.967	2.40304	0.244908	10.5213	6.89053e-26	2.91718e-23
ACKR4	8.14367	1.39438	14.893	2.73066	0.388531	10.5142	7.43203e-26	3.09568e-23
TRIM69	38.804	12.3343	65.2738	2.3133	0.240477	10.474	1.1379e-25	4.66447e-23
OAS3	122.833	44.0541	201.613	2.16899	0.226932	10.427	1.86751e-25	7.5357e-23
CFH	42.025	8.2631	75.7869	3.05129	0.347337	10.3981	2.53055e-25	1.00541e-22
SOCS3	8.42062	2.054	14.7873	2.36999	0.287283	10.2792	8.74856e-25	3.4232e-22
SAMHD1	173.908	61.8206	285.996	2.19172	0.229263	10.1245	4.30158e-24	1.65803e-21
HLA-B	119.791	26.7935	212.789	2.94337	0.276339	10.1127	4.85421e-24	1.84353e-21
NLRC5	84.9487	28.4433	141.454	2.27448	0.265035	10.0541	8.81322e-24	3.29857e-21
MSRB1	91.1891	28.0697	154.309	2.41755	0.258289	10.0489	9.29198e-24	3.42808e-21
CASP1	110.98	40.6204	181.34	2.13127	0.249021	9.87357	5.41981e-23	1.97136e-20
IFI30	125.176	45.9969	204.356	2.12749	0.232661	9.84449	7.24045e-23	2.59701e-20
XAF1	68.876	18.434	119.318	2.63019	0.288101	9.81582	9.62559e-23	3.40522e-20
APOL6	52.1132	18.9312	85.2952	2.11425	0.233183	9.71703	2.55102e-22	8.90271e-20
HLA-E	73.9676	21.6356	126.299	2.49156	0.268324	9.63592	5.63851e-22	1.94153e-19
CXCL9	220.115	0	440.231	8.78539	1.79744	9.60422	7.67343e-22	2.60745e-19
TRIM21	58.6559	19.9282	97.3837	2.23297	0.259353	9.58241	9.48105e-22	3.17984e-19
CFB	6.1475	1.60723	10.6878	2.16441	0.344252	9.39778	5.57262e-21	1.84504e-18
IL31RA	2.99723	0.43002	5.56445	2.19864	0.403109	9.34661	9.05024e-21	2.95851e-18
AIM2	5.12552	0.275611	9.97542	3.10502	0.629644	9.31217	1.25246e-20	4.04311e-18
LAMP3	6.61811	1.07086	12.1654	2.66844	0.350612	9.30675	1.31807e-20	4.20237e-18
STAT2	104.642	42.0419	167.242	1.96672	0.229481	9.04468	1.50108e-19	4.6957e-17
OAS1	76.5089	29.7329	123.285	2.0158	0.236738	9.04409	1.50917e-19	4.6957e-17
HLA-DRB1	9.19249	0.0834885	18.3015	4.15496	0.917779	9.02106	1.86282e-19	5.72706e-17
CD7	3.63789	0.386354	6.88942	2.50862	0.498021	8.96475	3.10976e-19	9.44817e-17
PDCD1LG2	5.22169	1.04669	9.39669	2.34476	0.366255	8.95142	3.50926e-19	1.0538e-16
ACE2	5.824	1.94141	9.70658	1.86392	0.310794	8.93365	4.12184e-19	1.22352e-16
IFIH1	34.3235	13.6206	55.0264	1.93811	0.253377	8.92616	4.41071e-19	1.29439e-16
PARP9	100.289	38.7321	161.845	2.03512	0.229679	8.91362	4.93909e-19	1.43317e-16
GSDMB	21.1774	5.34143	37.0134	2.58363	0.284778	8.89733	5.72064e-19	1.62347e-16
KRT17	604.838	155.415	1054.26	2.75415	0.318002	8.75342	2.06976e-18	5.80994e-16
PARP3	7.5697	1.4504	13.689	2.58365	0.331114	8.72191	2.73539e-18	7.59585e-16
ISG20	30.5211	11.3287	49.7135	2.04035	0.326777	8.68104	3.92164e-18	1.07741e-15
ZNF114	41.4601	18.347	64.5733	1.76099	0.240655	8.67426	4.16258e-18	1.13156e-15
BTN3A3	18.2042	6.32414	30.0844	2.08546	0.265409	8.65592	4.88935e-18	1.31529e-15
GBP3	138.657	43.5869	233.728	2.3963	0.29186	8.64736	5.27037e-18	1.40317e-15
RYR2	1.93707	0.333369	3.54077	1.76786	0.365222	8.63782	5.72941e-18	1.50982e-15
SERPING1	21.0227	0	42.0454	5.42779	1.46914	8.57549	9.8662e-18	2.57368e-15
CEACAM6	5.10724	1.54833	8.66615	1.92339	0.330768	8.53408	1.41272e-17	3.64836e-15
IFI27	23.6267	4.55028	42.7032	2.9771	0.341374	8.52957	1.46897e-17	3.75607e-15
SOCS1	5.2705	0.57841	9.9626	2.79605	0.489762	8.49774	1.9331e-17	4.89436e-15
SAMD9L	81.9527	13.7771	150.128	3.35434	0.405919	8.49273	2.01842e-17	5.06074e-15
HLA-F	18.071	3.11259	33.0294	3.04866	0.524082	8.45319	2.83446e-17	7.03845e-15
TEX29	6.68275	0.19565	13.1699	3.56696	0.762491	8.4212	3.72639e-17	9.16514e-15
HLA-DRB5	5.94111	0.0606085	11.8216	3.59561	0.921426	8.40687	4.21088e-17	1.02591e-14
PTGES3P1	16.1755	0.329609	32.0213	4.63432	0.821527	8.35084	6.77819e-17	1.6208e-14
SLC12A7	11.5701	3.80161	19.3385	2.08262	0.27293	8.2893	1.13914e-16	2.69893e-14
DDX60	35.4113	10.7292	60.0934	2.38092	0.321573	8.28633	1.168e-16	2.74215e-14
RTP4	27.1831	11.0512	43.3149	1.87862	0.254231	8.24957	1.58964e-16	3.69842e-14
ATF3	11.3826	2.99388	19.7714	2.37873	0.312805	8.16813	3.13206e-16	7.22192e-14
LYPD5	13.6208	5.02862	22.2129	1.94503	0.276511	8.0828	6.32985e-16	1.44662e-13
CD40	7.78171	2.63782	12.9256	1.93659	0.330284	8.07488	6.75455e-16	1.53014e-13
HLA-DRA	31.2683	0.0182715	62.5183	5.96298	1.45999	8.05489	7.95512e-16	1.78644e-13
FAM46C	1.01106	0.205704	1.81641	1.22398	0.403585	8.02506	1.01478e-15	2.25921e-13
IFI44	26.7002	8.72508	44.6752	2.23163	0.334367	7.98007	1.46252e-15	3.22817e-13
NUB1	224.275	113.198	335.352	1.55843	0.223022	7.97249	1.55513e-15	3.40349e-13
FRMD3	5.1605	1.48791	8.83309	1.98271	0.294585	7.9443	1.95293e-15	4.23819e-13
PML	93.7438	40.7325	146.755	1.82396	0.254956	7.9357	2.09314e-15	4.5046e-13
TAP2	10.4989	3.97229	17.0254	1.85805	0.27824	7.81538	5.47984e-15	1.15997e-12
PSMB10	117.933	39.1653	196.701	2.29929	0.299913	7.80798	5.81124e-15	1.22012e-12
CXCL11	69.0441	0	138.088	7.11986	1.89548	7.7683	7.95492e-15	1.65674e-12
MUC1	23.3275	10.6039	36.0511	1.67491	0.295456	7.75768	8.64965e-15	1.78702e-12
TMPRSS11E	2.70079	4.97523	0.426358	-2.06666	0.442085	-7.75216	9.03418e-15	1.85165e-12
ISG15	40.9865	10.6825	71.2904	2.62945	0.377048	7.7488	9.2764e-15	1.88632e-12
TBKBP1	3.08294	0.2448	5.92109	2.47509	0.489028	7.72541	1.11496e-14	2.24953e-12
TYMP	16.0119	4.31899	27.7048	2.43207	0.355425	7.71722	1.1889e-14	2.38011e-12
HLA-DPB1	4.41735	1.45394	7.38076	1.77198	0.446186	7.67478	1.65704e-14	3.29177e-12
RNF19B	62.8343	29.8836	95.7849	1.64794	0.230425	7.65172	1.98313e-14	3.9095e-12
HELZ2	20.4571	6.78883	34.1255	2.17304	0.306416	7.58285	3.38046e-14	6.61366e-12
BTN3A1	16.5417	7.5991	25.4843	1.62288	0.254839	7.57258	3.65888e-14	7.10455e-12
DTX3L	119.185	49.4834	188.886	1.91125	0.246942	7.54753	4.43598e-14	8.54919e-12
INPP1	136.515	63.3384	209.692	1.71138	0.234268	7.51066	5.88308e-14	1.12541e-11
HLA-A	10.9417	3.94725	17.9362	1.93645	0.305154	7.50599	6.09672e-14	1.1577e-11
CFAP57	6.10246	3.01959	9.18534	1.34137	0.277509	7.39845	1.37785e-13	2.54164e-11
DDX58	22.4109	9.45735	35.3644	1.79801	0.271953	7.39074	1.4601e-13	2.66584e-11
DHX58	6.5689	2.34483	10.793	1.81792	0.355096	7.3412	2.11685e-13	3.82291e-11
KLF4	34.8418	15.8155	53.8681	1.70618	0.250568	7.31218	2.62845e-13	4.71387e-11
FO681492.1	6.74526	2.12647	11.3641	1.98355	0.330622	7.25139	4.12504e-13	7.34684e-11
DSG4	11.9068	18.871	4.94273	-1.74146	0.259416	-7.24764	4.2408e-13	7.50129e-11
XDH	22.6091	12.9461	32.2721	1.25445	0.249557	7.21722	5.30619e-13	9.32193e-11
B2M	4696.27	2056.36	7336.18	1.83443	0.220985	7.21019	5.58756e-13	9.74992e-11
MLKL	69.1816	33.5114	104.852	1.6169	0.231677	7.2062	5.7534e-13	9.97192e-11
EDNRA	1.89307	0.363917	3.42222	1.69701	0.513979	7.1791	7.01695e-13	1.20808e-10
TRIB2	5.19625	1.94485	8.44766	1.68176	0.306654	7.16362	7.85736e-13	1.34382e-10
HLA-C	128.214	76.0144	180.415	1.23609	0.23164	7.14531	8.97928e-13	1.52559e-10
PARP12	67.0573	33.1544	100.96	1.57786	0.244638	7.13557	9.6386e-13	1.62691e-10
PSME2	272.326	142.256	402.396	1.49359	0.23014	7.11757	1.09848e-12	1.8421e-10
MTRNR2L8	4.88225	9.72307	0.0414335	-3.36408	1.09356	-7.07232	1.5236e-12	2.53851e-10
CDK18	46.96	23.7327	70.1873	1.5252	0.268858	7.00669	2.44024e-12	4.0397e-10
CETP	1.70575	0.164231	3.24727	1.86716	0.641474	6.98227	2.9045e-12	4.77762e-10
SP140L	24.2264	13.2148	35.2379	1.35011	0.251545	6.97468	3.06563e-12	5.01076e-10
TRANK1	6.44777	3.00549	9.89005	1.44296	0.282292	6.97244	3.11491e-12	5.05929e-10
C3	41.0891	26.305	55.8732	1.05859	0.238229	6.94264	3.84849e-12	6.2117e-10
PSMB8	97.5419	29.7994	165.285	2.43268	0.375938	6.93837	3.96649e-12	6.3624e-10
HLA-DPA1	8.54371	0.017464	17.0699	4.15054	1.47043	6.90553	5.00173e-12	7.97344e-10
AC254813.2	3.75504	1.02638	6.4837	1.88484	0.488838	6.90164	5.14065e-12	8.14462e-10
IL15RA	35.5934	18.0648	53.1219	1.5053	0.249103	6.89229	5.49006e-12	8.64516e-10
TNFRSF14	8.16099	2.7662	13.5558	1.95041	0.358222	6.8794	6.01033e-12	9.35041e-10
GRAMD2B	93.2716	41.2876	145.256	1.79018	0.242744	6.87789	6.0747e-12	9.39396e-10
SPTA1	0.803657	0.0653195	1.542	1.25468	0.663828	6.82812	8.60338e-12	1.32251e-09
PXT1	2.56751	0.119718	5.0153	2.4255	0.834906	6.81326	9.54143e-12	1.45803e-09
STON1	9.44412	14.5082	4.38009	-1.52732	0.263369	-6.80132	1.03666e-11	1.57481e-09
IFITM3	645.388	364.102	926.673	1.34532	0.224339	6.78877	1.13096e-11	1.70801e-09
GBP6	39.816	20.3866	59.2452	1.49414	0.242874	6.77676	1.22905e-11	1.83469e-09
NMI	91.5163	44.0682	138.964	1.63488	0.260841	6.77533	1.24125e-11	1.84226e-09
TNFSF10	58.4012	26.4605	90.342	1.73392	0.286916	6.76992	1.28852e-11	1.90148e-09
APOL4	14.3496	4.8208	23.8784	2.0956	0.290875	6.74843	1.49452e-11	2.19295e-09
EIF3CL	48.1359	24.8316	71.4402	1.48765	0.243021	6.74082	1.57494e-11	2.2979e-09
TNFRSF1B	2.38517	0.85865	3.91168	1.40196	0.344033	6.69115	2.21426e-11	3.21254e-09
PLCH1	0.484272	0.078851	0.889692	0.808656	0.554328	6.68656	2.28481e-11	3.29639e-09
ZNFX1	60.4488	32.2413	88.6564	1.43143	0.230504	6.58103	4.672e-11	6.66599e-09
OPTN	132.437	67.4044	197.47	1.53676	0.236635	6.57099	4.99822e-11	7.09225e-09
PAPSS2	15.2689	22.889	7.64881	-1.46577	0.251783	-6.56765	5.11155e-11	7.21343e-09
SCEL	17.1106	28.1733	6.04785	-2.04939	0.330105	-6.5657	5.17905e-11	7.26897e-09
MARCKSL1	47.9723	21.0205	74.924	1.78571	0.29841	6.54717	5.86385e-11	8.18562e-09
STEAP4	29.7499	12.1851	47.3148	1.87356	0.276283	6.52063	7.00122e-11	9.72078e-09
CEACAM1	7.27434	3.63278	10.9159	1.36294	0.363712	6.51485	7.27642e-11	1.00489e-08
RHBDF2	55.4305	24.9883	85.8727	1.74104	0.28058	6.48962	8.60544e-11	1.1821e-08
NRSN1	20.7134	36.8925	4.53427	-2.77545	0.454471	-6.44656	1.14418e-10	1.56342e-08
PARP10	13.3843	5.14001	21.6286	1.88183	0.370419	6.42239	1.34149e-10	1.80437e-08
ASPHD2	3.75768	1.59801	5.91735	1.41281	0.311539	6.38481	1.71614e-10	2.29634e-08
JAK2	7.81183	3.04456	12.5791	1.74733	0.328119	6.30405	2.89962e-10	3.84014e-08
C19orf66	10.895	5.15813	16.6319	1.51762	0.288922	6.2964	3.04641e-10	4.01396e-08
BTN3A2	18.9942	9.78326	28.2051	1.43743	0.244719	6.28889	3.19735e-10	4.19145e-08
SEMA5A	16.3226	24.5635	8.08163	-1.49306	0.244092	-6.28346	3.31117e-10	4.30651e-08
LGALS9	20.5058	8.93989	32.0718	1.7343	0.324093	6.28312	3.31847e-10	4.30651e-08
LACTB	63.3312	31.8185	94.8439	1.54618	0.252983	6.26621	3.6993e-10	4.77673e-08
SP100	97.8241	49.8817	145.767	1.52831	0.267064	6.23306	4.57421e-10	5.87706e-08
PARD3	88.1741	49.3558	126.993	1.34583	0.224772	6.18464	6.22456e-10	7.91868e-08
FAM84A	51.9722	31.3256	72.6188	1.18739	0.238074	6.18061	6.38542e-10	8.08351e-08
MCUB	34.2944	18.028	50.5607	1.43815	0.260563	6.16459	7.06644e-10	8.90199e-08
PLSCR1	207.854	99.7748	315.934	1.65305	0.263921	6.13552	8.48833e-10	1.05899e-07
SLC25A28	87.6401	51.2007	124.079	1.2607	0.259027	6.12385	9.13387e-10	1.13405e-07
LGALS3BP	169.361	88.5435	250.178	1.48805	0.264417	6.0847	1.1671e-09	1.43526e-07
CCDC3	1.16641	0.25802	2.0748	1.28934	0.505773	6.07514	1.23877e-09	1.51617e-07
RFX5	99.3293	51.7921	146.867	1.4859	0.236826	6.07196	1.26356e-09	1.53922e-07
IFIT2	69.7812	38.012	101.55	1.39434	0.251401	6.06954	1.28274e-09	1.55525e-07
SERPINB1	124.072	61.8235	186.321	1.57613	0.241306	6.06769	1.2976e-09	1.56591e-07
RPL22P1	283.361	174.081	392.64	1.16886	0.237186	6.04735	1.47252e-09	1.76873e-07
STAT5A	1.42322	0.5937	2.25275	1.02928	0.498072	6.02814	1.65858e-09	1.96481e-07
SCN9A	8.32066	3.66679	12.9745	1.5823	0.326029	6.01832	1.76241e-09	2.07828e-07
SERPINB2	370.146	204.087	536.205	1.38924	0.257782	5.98548	2.15753e-09	2.52119e-07
LRRN2	0.748766	0.193192	1.30434	0.949527	0.503225	5.94826	2.71003e-09	3.15255e-07
ZNF704	35.6575	48.4111	22.9038	-1.04759	0.252218	-5.88134	4.06953e-09	4.69177e-07
AC005832.4	44.2728	16.9772	71.5684	2.01317	0.38737	5.82926	5.56732e-09	6.30597e-07
FBXO6	3.48131	1.17724	5.78538	1.63993	0.428269	5.78402	7.29364e-09	8.22525e-07
RBCK1	106.168	63.0323	149.303	1.231	0.253724	5.77072	7.89341e-09	8.84775e-07
ARL4D	32.5457	17.1594	47.9319	1.43005	0.278265	5.77028	7.91415e-09	8.84775e-07
DUSP5	6.48693	3.00923	9.96463	1.45146	0.317677	5.7593	8.44621e-09	9.40187e-07
NUCB1	74.8031	38.7968	110.809	1.49032	0.279234	5.75099	8.87223e-09	9.83371e-07
PAM16	6.82629	1e-06	13.6526	3.87308	1.58416	5.73532	9.73272e-09	1.07413e-06
CBR3	77.6971	40.0686	115.326	1.50206	0.291303	5.72825	1.01474e-08	1.11047e-06
PSME1	311.3	190.429	432.171	1.17813	0.229961	5.72824	1.01479e-08	1.11047e-06
BCL2L14	5.00674	1.55288	8.46061	1.88981	0.438999	5.71597	1.09077e-08	1.18857e-06
FLG	7.63205	11.5566	3.7075	-1.41541	0.273585	-5.66051	1.50923e-08	1.63764e-06
MUC4	0.275672	0.0896695	0.461674	0.42373	0.823622	5.63807	1.71964e-08	1.84273e-06
AC114801.3	53.4541	106.651	0.256796	-6.42047	1.56027	-5.62806	1.8225e-08	1.94488e-06
AC093063.1	9.12975	0	18.2595	4.2675	1.56584	5.61516	1.96376e-08	2.087e-06
GVINP1	0.642033	0.215959	1.06811	0.766215	0.431765	5.6122	1.99773e-08	2.1144e-06
HOXC13	25.4402	37.2563	13.6241	-1.38736	0.240114	-5.58424	2.34729e-08	2.47423e-06
NAIP	0.728401	1.28543	0.171372	-0.964267	0.503482	-5.55092	2.84163e-08	2.98314e-06
CTSO	1.2044	0.326357	2.08244	1.21661	0.502212	5.54758	2.89643e-08	3.02836e-06
CLEC2B	50.1366	27.193	73.0802	1.39375	0.245934	5.54298	2.9736e-08	3.0965e-06
OGFR	48.1838	25.3648	71.0028	1.44944	0.306103	5.52738	3.25053e-08	3.37128e-06
BCL6	10.2622	5.79473	14.7296	1.211	0.27208	5.52247	3.3427e-08	3.45301e-06
HPGD	9.09468	14.1535	4.03585	-1.58934	0.345665	-5.51625	3.46317e-08	3.56321e-06
NRG1	178.146	114.165	242.127	1.07801	0.242858	5.51101	3.56787e-08	3.65636e-06
UBA7	9.87266	4.33417	15.4111	1.62134	0.349972	5.50541	3.68311e-08	3.75953e-06
SERPINE1	29.1157	17.6545	40.5769	1.15626	0.237164	5.49778	3.84609e-08	3.91044e-06
STAT3	99.2776	61.6492	136.906	1.13832	0.223729	5.44012	5.32437e-08	5.39223e-06
TAPBPL	24.6133	14.2354	34.9911	1.24021	0.292116	5.43758	5.40085e-08	5.44832e-06
IFI16	404.625	202.071	607.178	1.58251	0.332998	5.34187	9.19948e-08	9.2084e-06
RIPK2	31.5848	20.2141	42.9556	1.05102	0.25798	5.32817	9.9206e-08	9.89187e-06
PHF11	33.7227	19.1882	48.2572	1.28683	0.284434	5.32256	1.02315e-07	1.01575e-05
CLUAP1	78.3213	43.8304	112.812	1.34411	0.230748	5.32196	1.02656e-07	1.01575e-05
ARHGAP25	8.27727	4.4838	12.0708	1.25309	0.311979	5.3082	1.10714e-07	1.08715e-05
ITGA6	644.533	412.964	876.102	1.08324	0.222117	5.30225	1.14385e-07	1.11894e-05
TRIM26	10.7469	6.3849	15.1089	1.1252	0.255863	5.26747	1.3832e-07	1.34797e-05
TMPRSS3	1.67982	0.278925	3.08072	1.67389	0.60348	5.264	1.40951e-07	1.36465e-05
PMAIP1	62.6297	35.0175	90.242	1.341	0.268135	5.26382	1.41089e-07	1.36465e-05
STX11	3.74165	1.55141	5.93189	1.44195	0.38987	5.25444	1.48474e-07	1.43073e-05
IL12A	1.77856	0.504374	3.05275	1.42974	0.586635	5.23871	1.61702e-07	1.5524e-05
IFITM2	208.78	104.687	312.874	1.57039	0.24388	5.23797	1.62349e-07	1.55284e-05
SOWAHB	0.972206	0.276407	1.668	1.06367	0.514507	5.23562	1.64436e-07	1.567e-05
CEACAM5	3.14582	1.3613	4.93034	1.32853	0.385702	5.23422	1.65687e-07	1.57311e-05
HSD17B2	12.3921	3.46341	21.3209	2.32217	0.263401	5.22076	1.78193e-07	1.68565e-05
BAK1	26.1774	15.1712	37.1837	1.23953	0.27049	5.19502	2.04694e-07	1.92868e-05
HLA-DRB4	2.36519	0.0217925	4.70859	2.48203	1.51962	5.1944	2.05377e-07	1.92868e-05
MXRA5	58.3479	37.4484	79.2475	1.06153	0.227353	5.17345	2.29807e-07	2.15028e-05
RNF152	64.0236	36.0881	91.9591	1.32564	0.250375	5.16729	2.37507e-07	2.2143e-05
CCL22	2.66515	1.26914	4.06116	1.15732	0.344591	5.16574	2.39494e-07	2.2248e-05
USP43	10.9125	6.53351	15.2915	1.11273	0.275493	5.16374	2.42061e-07	2.24059e-05
PRRT2	5.03144	2.49892	7.56395	1.29137	0.406616	5.15933	2.47834e-07	2.28583e-05
SBNO2	22.2115	13.2978	31.1252	1.16791	0.324318	5.13848	2.76967e-07	2.54544e-05
VEGFC	9.89083	5.47632	14.3054	1.24079	0.290789	5.11638	3.11453e-07	2.85223e-05
NANOS1	5.32451	8.54514	2.10389	-1.62069	0.303708	-5.09771	3.43785e-07	3.13376e-05
ADAR	271.443	175.719	367.168	1.05891	0.221059	5.09725	3.44622e-07	3.13376e-05
KRT6A	1217.14	791.901	1642.37	1.05144	0.229144	5.09312	3.52213e-07	3.19154e-05
C1orf21	70.8723	51.0072	90.7374	0.818796	0.226979	5.08682	3.64118e-07	3.27643e-05
RALA	273.881	132.226	415.536	1.64457	0.249937	5.07712	3.83192e-07	3.43609e-05
IL6	3.53464	0.780799	6.28848	2.03309	0.584337	5.06655	4.051e-07	3.61997e-05
PRDM1	2.27199	1.37696	3.16702	0.809895	0.422473	5.06249	4.13807e-07	3.68502e-05
TARSL2	23.3326	15.4443	31.2208	0.970407	0.260952	5.05656	4.26898e-07	3.78853e-05
CASP1P2	3.63253	1.07731	6.18776	1.79082	0.527633	5.0549	4.30613e-07	3.80841e-05
ACP2	18.1357	10.8268	25.4445	1.16091	0.273907	5.0512	4.39054e-07	3.86982e-05
CD47	263.811	152.905	374.716	1.2876	0.268796	5.03203	4.85314e-07	4.26301e-05
IGFLR1	5.03988	3.06558	7.01417	0.979093	0.453944	5.02427	5.05344e-07	4.4239e-05
C6orf48	1.43114	2.86228	0	-1.94945	1.59821	-5.01716	5.244e-07	4.57521e-05
SOCS2	25.6218	36.6872	14.5564	-1.27656	0.263375	-5.01483	5.3081e-07	4.61554e-05
LINC00869	48.4053	24.7792	72.0314	1.50231	0.274854	4.98293	6.26295e-07	5.40939e-05
MDGA1	16.7071	10.696	22.7182	1.01998	0.28246	4.98067	6.33656e-07	5.45472e-05
OASL	6.97609	3.89116	10.061	1.17724	0.304756	4.96968	6.70626e-07	5.75379e-05
H3F3AP4	33.9055	0	67.811	6.10457	4.78506	4.96145	6.99691e-07	5.98328e-05
ACAN	0.420766	0.0689405	0.772591	0.729679	0.688372	4.95803	7.12098e-07	6.06928e-05
SFMBT2	5.12014	3.31227	6.92802	0.878514	0.279305	4.95444	7.25406e-07	6.16237e-05
STARD5	23.5754	14.0105	33.1402	1.1855	0.252125	4.93634	7.96004e-07	6.73994e-05
AL139300.1	10.9132	5.7344	16.092	1.34369	0.32391	4.93124	8.17078e-07	6.89576e-05
GSDMC	16.0082	8.21292	23.8035	1.42881	0.277197	4.92698	8.35086e-07	7.02479e-05
METTL7A	3.02359	4.38936	1.65781	-1.01988	0.332208	-4.91847	8.7224e-07	7.3135e-05
FLNB	196.088	128.456	263.721	1.03201	0.236562	4.90047	9.56092e-07	7.96785e-05
IRF7	6.10968	3.12075	9.0986	1.29318	0.380791	4.89396	9.88247e-07	8.1814e-05
AKAP2	95.1526	55.5358	134.769	1.26392	0.247468	4.89393	9.88421e-07	8.1814e-05
LGMN	38.8687	25.0037	52.7338	1.04712	0.2734	4.87799	1.07173e-06	8.84263e-05
MTRNR2L1	1.594	3.16966	0.0183475	-2.0337	1.51894	-4.87408	1.09318e-06	8.9909e-05
RPL21P16	323.884	0	647.768	9.34156	3.02042	4.8659	1.13939e-06	9.34115e-05
AC270285.4	59.4395	17.7837	101.095	2.44237	0.571562	4.86073	1.16951e-06	9.55781e-05
MMP1	6.3588	9.70297	3.01463	-1.41467	0.323259	-4.84407	1.27209e-06	0.000103633
RAB19	9.33149	4.69954	13.9634	1.39253	0.355759	4.84174	1.28706e-06	0.000104523
LY75-CD302	2.1033	1.05109	3.15551	1.01864	0.352399	4.83022	1.36381e-06	0.000110409
GBP7	0.381797	0	0.763594	0.818518	1.63844	4.82823	1.37753e-06	0.000111171
HLA-L	0.194531	0	0.389062	0.474112	1.6399	4.81639	1.46176e-06	0.000117601
DYRK4	75.0047	45.5864	104.423	1.17821	0.25504	4.81268	1.48921e-06	0.000119112
MT2A	396.638	271.418	521.857	0.940592	0.229367	4.8126	1.48976e-06	0.000119112
RAG1	0.868107	0.465114	1.2711	0.632378	0.452175	4.80118	1.57732e-06	0.000125723
PKP4	88.0694	57.9488	118.19	1.01573	0.229894	4.7992	1.593e-06	0.000126582
RORB	0.310357	0.0669025	0.553811	0.542383	0.635106	4.79534	1.62402e-06	0.000128651
MAN1A1	2.06656	1.0655	3.06762	0.97769	0.340273	4.77973	1.75528e-06	0.000138624
HIST1H3D	34.6508	0	69.3015	6.13548	4.78506	4.77121	1.83122e-06	0.00014418
ACTA2	6.92865	3.51682	10.3405	1.3281	0.369439	4.76715	1.8685e-06	0.000146432
SMN1	14.2745	8.59744	19.9517	1.12634	0.577034	4.76497	1.88882e-06	0.000147368
GSAP	15.8488	8.6564	23.0412	1.31595	0.323211	4.76223	1.91465e-06	0.000148934
ADGRE5	21.2578	13.7334	28.7821	1.01535	0.281597	4.72102	2.3467e-06	0.000181992
CLDN8	1.19231	2.15215	0.232462	-1.35479	0.654056	-4.71337	2.43648e-06	0.00018839
FCAR	0.349	0.000617	0.697383	0.762422	1.65038	4.71252	2.44673e-06	0.000188617
IVL	16.6444	25.1725	8.11638	-1.52152	0.321831	-4.71044	2.47187e-06	0.000189988
AC006011.1	5.28141	0	10.5628	3.53142	1.68763	4.70084	2.59097e-06	0.000198551
ADGRF4	14.1848	9.29495	19.0747	0.963441	0.244477	4.69778	2.62999e-06	0.000200945
TMEM173	18.4986	12.0148	24.9824	0.997379	0.251971	4.69506	2.66531e-06	0.000203043
GIMAP2	6.52355	3.39211	9.65499	1.27854	0.391659	4.6897	2.73611e-06	0.000207824
TBX21	0.323235	0	0.64647	0.719376	1.65476	4.68061	2.86018e-06	0.00021661
FAS	36.8066	18.0922	55.521	1.56581	0.302909	4.67573	2.92909e-06	0.000221181
PRPF31	4.26992	6.72771	1.81214	-1.45837	0.379611	-4.66399	3.10141e-06	0.00023351
NDUFC2-KCTD14	1.66408	0	3.32816	2.11376	1.65821	4.65671	3.21304e-06	0.000241211
CARD11	44.6679	26.9068	62.4289	1.18452	0.256931	4.6505	3.31136e-06	0.000247713
ERAP2	35.3284	24.7464	45.9102	0.86553	0.307393	4.63469	3.57465e-06	0.000266038
CD5L	0.830255	0.01056	1.64995	1.39081	1.55987	4.62743	3.70237e-06	0.000274752
SLC29A3	14.1431	20.1366	8.14945	-1.20799	0.261197	-4.62411	3.76203e-06	0.00027838
ILK	111.515	73.8539	149.177	1.00451	0.244582	4.60211	4.1824e-06	0.000308602
KLK7	17.2255	24.4247	10.0264	-1.20527	0.269907	-4.59523	4.32274e-06	0.000318048
KRT16	9.77519	4.61475	14.9356	1.50496	0.435216	4.58653	4.5068e-06	0.000330591
CPA4	10.3244	15.3029	5.34593	-1.36122	0.298737	-4.58597	4.51883e-06	0.000330591
TLN2	5.21332	3.56956	6.85707	0.781935	0.28383	4.57534	4.75456e-06	0.000346854
DDX23	139.165	89.3833	188.947	1.07147	0.256873	4.56963	4.88578e-06	0.000355423
MYZAP	5.69558	8.53174	2.85942	-1.30436	0.314109	-4.55866	5.14803e-06	0.000373449
ZDHHC4P1	1.51692	0.258939	2.77489	1.58423	0.784776	4.5578	5.16925e-06	0.000373938
WDR25	8.67644	4.52837	12.8245	1.3223	0.317558	4.54127	5.59161e-06	0.000403361
IRF2	53.6578	32.2981	75.0174	1.19089	0.25245	4.53627	5.72577e-06	0.000411888
CHD5	0.333081	0.086601	0.579561	0.539702	0.643126	4.53111	5.86735e-06	0.000420901
EML5	6.73311	8.76123	4.70498	-0.774841	0.269824	-4.52751	5.96836e-06	0.000426961
C4B_2	0.224008	0.026276	0.421741	0.47024	0.942747	4.52477	6.04612e-06	0.000431329
AC073896.1	12.0857	1.84619	22.3253	3.03479	0.691207	4.52078	6.16117e-06	0.000438326
CASP7	42.6996	28.4561	56.9431	0.976073	0.232491	4.51735	6.2619e-06	0.000444268
CALCOCO2	132.312	89.1522	175.472	0.969005	0.226046	4.51344	6.37855e-06	0.000451304
MVP	148.257	91.4809	205.034	1.15566	0.310816	4.50982	6.48822e-06	0.000457222
MPPED2	5.96035	9.31709	2.60362	-1.51752	0.344576	-4.50952	6.49759e-06	0.000457222
PCYT1A	169.035	114.396	223.674	0.96124	0.224424	4.50652	6.5898e-06	0.00046245
ABHD16A	19.8595	13.7097	26.0094	0.876691	0.273285	4.50323	6.6929e-06	0.000468412
TAPBP	52.9607	32.2516	73.6698	1.1671	0.232168	4.4963	6.91454e-06	0.000482616
DRAM1	51.9616	40.1255	63.7978	0.655909	0.237354	4.48845	7.17416e-06	0.000499387
HNF4G	2.24496	1.0357	3.45422	1.12964	0.49895	4.48783	7.19521e-06	0.000499506
RALB	140.841	91.6691	190.013	1.04351	0.224554	4.48712	7.21925e-06	0.000499759
CNDP2	170.821	114.978	226.665	0.973061	0.229262	4.48658	7.23756e-06	0.000499759
AL157871.3	9.78811	1.26617	18.3101	3.09102	0.918259	4.48317	7.35432e-06	0.000506467
ATF6B	1.19966	2.26003	0.139295	-1.51674	0.88509	-4.48125	7.42062e-06	0.000509674
CEBPD	6.02069	3.57069	8.47069	1.05106	0.30365	4.47333	7.70097e-06	0.000527527
ITPKC	13.5	7.99159	19.0084	1.15396	0.30537	4.46773	7.90549e-06	0.000540104
RASGRP3	4.66593	3.83779	5.49407	0.424773	0.383173	4.46668	7.94437e-06	0.000540598
AC023055.1	5.20702	2.63254	7.78149	1.27349	0.45996	4.4664	7.95458e-06	0.000540598
LUZP2	19.2278	28.391	10.0647	-1.40941	0.321289	-4.44893	8.63001e-06	0.000584961
FAT3	2.66168	3.83857	1.4848	-0.961452	0.270021	-4.4459	8.75232e-06	0.000591698
TDRD7	30.3832	21.5078	39.2585	0.83887	0.240039	4.44206	8.91016e-06	0.000600796
ASS1	329.643	211.488	447.798	1.07868	0.276615	4.42588	9.60487e-06	0.000645952
FMNL2	23.3741	15.4727	31.2754	0.970358	0.264793	4.42468	9.65867e-06	0.000647883
TBC1D1	17.0297	12.3749	21.6844	0.762181	0.254495	4.42172	9.79197e-06	0.000655124
PPA1	541.485	379.801	703.168	0.886879	0.230382	4.41777	9.97262e-06	0.000665486
DGKG	12.0291	6.54271	17.5155	1.29558	0.267411	4.40808	1.04293e-05	0.000694167
SLC25A22	36.1834	22.2713	50.0956	1.13465	0.322742	4.40725	1.04689e-05	0.000695014
CSAG3	2.16273	0.465419	3.86003	1.72965	0.731389	4.40213	1.07195e-05	0.000709821
ARHGAP19-SLIT1	0.740329	0.019167	1.46149	1.27214	1.36067	4.3949	1.10824e-05	0.000730108
NEU1	0.725035	1.39313	0.0569425	-1.179	1.10392	-4.37993	1.1872e-05	0.000780138
APOBEC3F	10.9015	8.03078	13.7721	0.709957	0.292562	4.37592	1.20919e-05	0.000792572
SERF1A	1.35169	0.297	2.40638	1.39306	0.901702	4.36271	1.28461e-05	0.000839876
ABAT	6.28118	8.29902	4.26335	-0.821099	0.283085	-4.3607	1.29645e-05	0.000845478
IL22RA1	5.29272	3.20449	7.38096	0.995186	0.300833	4.35996	1.30085e-05	0.000846206
ODF3B	6.17895	2.79893	9.55897	1.47481	0.553955	4.35926	1.305e-05	0.000846776
HCAR2	70.663	46.3415	94.9846	1.0197	0.26452	4.35335	1.34074e-05	0.000867787
GUK1	165.756	99.6205	231.893	1.21074	0.304513	4.35205	1.34873e-05	0.000869825
CD24	347.495	476.14	218.85	-1.1179	0.269441	-4.35168	1.35097e-05	0.000869825
RNF114	82.1669	54.0643	110.269	1.01487	0.233152	4.35119	1.354e-05	0.000869825
SLFN11	71.4464	46.3023	96.5906	1.04483	0.232279	4.34614	1.38555e-05	0.000887889
ALPK1	13.2175	10.2493	16.1857	0.611381	0.254669	4.33465	1.4599e-05	0.000933214
TMEM171	12.3001	7.3815	17.2188	1.12014	0.30766	4.33223	1.47606e-05	0.000940395
MTRNR2L6	0.576143	1.15229	0	-1.10587	1.68205	-4.33114	1.4834e-05	0.000940395
STOML1	9.16469	5.40762	12.9217	1.11948	0.266742	4.3308	1.4857e-05	0.000940395
HECW2	1.5452	2.38655	0.703851	-0.991019	0.359273	-4.32032	1.55805e-05	0.000983779
AC244669.1	49.3529	31.6456	67.0602	1.05993	0.297281	4.31351	1.60686e-05	0.00101213
CYP26B1	13.3257	8.93484	17.7166	0.91375	0.275171	4.31206	1.6174e-05	0.00101628
AC067945.1	3.31304	0.8127	5.81339	1.91023	0.709012	4.30565	1.66497e-05	0.00104364
DLL1	11.4365	6.61383	16.2592	1.18067	0.279986	4.30372	1.67955e-05	0.00105023
ALDH1A3	251.235	303.93	198.541	-0.611796	0.22185	-4.29951	1.71176e-05	0.00106521
PEG10	14.051	17.3458	10.7562	-0.642027	0.254469	-4.28964	1.78963e-05	0.00110832
CSF1R	2.42476	1.90457	2.94496	0.441684	0.43621	4.28624	1.81719e-05	0.0011227
SMG1P4	17.7649	7.44529	28.0845	1.78403	0.536222	4.28335	1.84101e-05	0.0011347
CASP10	15.1793	9.2339	21.1246	1.1123	0.249395	4.27393	1.92059e-05	0.00118093
SFRP1	1.05389	0.49941	1.60838	0.798756	0.422361	4.27054	1.94999e-05	0.00119616
MSN	252.087	174	330.174	0.920234	0.240017	4.26478	2.00103e-05	0.00122456
SYT14	10.1267	15.1137	5.13962	-1.39207	0.383	-4.25494	2.09103e-05	0.00127661
MMP25	4.04418	1.90811	6.18025	1.30395	0.480326	4.24602	2.17597e-05	0.00132534
DDX39B	0.371586	0.743047	0.0001235	-0.801434	1.69557	-4.24266	2.20884e-05	0.00134219
AC245100.4	10.4076	6.04071	14.7745	1.1638	0.333969	4.23588	2.27659e-05	0.00138011
C1orf226	20.467	13.1956	27.7384	1.01754	0.255948	4.23168	2.31957e-05	0.00140288
DNAJA1	203.184	142.524	263.844	0.883843	0.238297	4.21605	2.48623e-05	0.00150016
PLAUR	37.1177	26.7686	47.4668	0.803542	0.263531	4.21481	2.49988e-05	0.00150488
EXOC3L1	1.91023	0.436267	3.38419	1.60999	0.623659	4.19412	2.73936e-05	0.00164521
LYPD1	29.0968	19.6578	38.5358	0.936471	0.25425	4.1879	2.81543e-05	0.00168697
MITF	17.0901	22.7705	11.4096	-0.937707	0.30434	-4.18385	2.86613e-05	0.00171337
HMGB1P3	4.72376	1.68754	7.75999	1.70464	0.580285	4.17908	2.92689e-05	0.00174566
FAM102B	6.0181	8.20522	3.83099	-0.930133	0.268392	-4.17083	3.03496e-05	0.00180594
BTN2A2	8.46308	5.37026	11.5559	0.97894	0.278636	4.16447	3.12079e-05	0.00185275
AC018644.1	7.39006	3.12193	11.6582	1.61868	0.510772	4.16215	3.15265e-05	0.0018656
RAPH1	21.1629	14.3129	28.013	0.921952	0.241999	4.16184	3.1569e-05	0.0018656
FLI1	3.93994	2.12611	5.75377	1.11132	0.364173	4.16012	3.18083e-05	0.00187545
HRK	8.98184	12.221	5.74263	-0.971453	0.281638	-4.15914	3.19446e-05	0.0018792
AC074019.1	1.09184	0.173414	2.01027	1.35918	0.894247	4.15741	3.21881e-05	0.00188922
GADD45B	27.7811	18.1176	37.4445	1.00788	0.301612	4.15679	3.22755e-05	0.00189006
TSPAN8	2.89644	4.96366	0.82922	-1.70497	0.563044	-4.15527	3.24898e-05	0.0018983
ARFGAP3	11.441	8.46931	14.4126	0.702778	0.268926	4.14184	3.44532e-05	0.00200395
CPNE1	129.01	88.7601	169.259	0.923584	0.257635	4.1388	3.49132e-05	0.00202614
FLOT2	45.234	30.5119	59.956	0.95187	0.263646	4.13774	3.50747e-05	0.00203095
AC005943.1	14.2542	5.94406	22.5644	1.76276	0.504846	4.13078	3.61533e-05	0.00208175
HMCN2	2.36158	1.37041	3.35277	0.876799	0.449423	4.13056	3.61886e-05	0.00208175
NALCN	14.5754	20.1528	8.99804	-1.08113	0.280255	-4.13052	3.61938e-05	0.00208175
TRAFD1	135.906	98.4691	173.344	0.809612	0.237946	4.12586	3.69358e-05	0.0021197
CA11	4.61047	2.48953	6.73141	1.1477	0.38822	4.1232	3.73644e-05	0.00213955
ERAP1	99.7573	71.0182	128.496	0.846481	0.243235	4.1193	3.80019e-05	0.00217124
SLC10A6	1.6537	0.589499	2.71789	1.22591	0.612635	4.11665	3.84427e-05	0.00219157
BHLHE41	11.4418	16.0956	6.78789	-1.13432	0.311525	-4.10818	3.98783e-05	0.00226841
NUAK2	8.46273	5.47286	11.4526	0.943974	0.284959	4.10021	4.12776e-05	0.00234284
SEMA6D	2.52013	4.10001	0.940251	-1.39426	0.485527	-4.09916	4.14655e-05	0.00234835
FOXA1	15.5243	21.7959	9.25284	-1.15275	0.262502	-4.08583	4.39192e-05	0.00248187
TMEM139	29.6692	40.6609	18.6776	-1.08214	0.259551	-4.07386	4.62405e-05	0.00260166
PTGER2	4.11711	6.23763	1.99659	-1.27219	0.373428	-4.07003	4.70071e-05	0.00263904
PRAG1	12.2122	8.20125	16.2232	0.904446	0.269469	4.0602	4.90309e-05	0.00274669
GTPBP1	28.1665	17.8093	38.5236	1.07126	0.275489	4.05824	4.94436e-05	0.00276381
SDSL	9.11827	5.27419	12.9624	1.15404	0.409278	4.05439	5.02663e-05	0.00280373
THSD1	8.54003	5.74127	11.3388	0.87211	0.261808	4.05342	5.04739e-05	0.00280924
MOV10	55.2779	46.4383	64.1174	0.456989	0.239795	4.05047	5.11151e-05	0.00283881
KCTD14	2.29625	1.02207	3.57043	1.1765	0.469214	4.04469	5.23931e-05	0.00290354
PSMA4	817.136	617.601	1016.67	0.718193	0.231154	4.04003	5.34452e-05	0.00294919
HSPA1B	12.9658	6.72859	19.203	1.38629	0.419898	4.03599	5.43729e-05	0.00299399
PNLIPRP3	1.70948	2.71823	0.700721	-1.12847	0.4572	-4.03386	5.48685e-05	0.00301485
ACSS1	5.97435	3.9316	8.01711	0.87061	0.290018	4.0292	5.59677e-05	0.00306394
CDKN2B	8.00358	9.67963	6.32753	-0.543463	0.282421	-4.02906	5.59992e-05	0.00306394
FAM117B	4.27055	2.85607	5.68503	0.793802	0.276867	4.02762	5.6345e-05	0.00307634
FABP5P7	24.6791	11.7648	37.5934	1.59618	0.486703	4.01351	5.98222e-05	0.0032593
PLCXD3	2.00994	2.97987	1.04002	-0.964135	0.355465	-4.00402	6.22757e-05	0.00338583
KARS	406.005	295.779	516.23	0.801415	0.229609	4	6.33423e-05	0.00343659
MAST3	3.31916	2.1161	4.52222	0.825507	0.307046	3.99297	6.52504e-05	0.00353269
AP000295.1	4.77177	3.24232	6.30124	0.783289	0.284409	3.98754	6.67631e-05	0.00360702
NFIX	25.6329	17.7582	33.5076	0.879397	0.242163	3.98077	6.86935e-05	0.00370357
STOM	13.0429	7.83	18.2559	1.12482	0.275436	3.97939	6.90932e-05	0.00371736
FOSB	1.933	0.970388	2.89561	0.983368	0.407435	3.96339	7.38944e-05	0.00395917
WNT5B	0.793683	0.33339	1.25398	0.757374	0.843822	3.95882	7.53223e-05	0.00402733
BLNK	7.83453	4.91068	10.7584	0.992295	0.355282	3.95813	7.55377e-05	0.0040305
TMSB10	4032.3	2786.55	5278.06	0.921285	0.297745	3.95544	7.63935e-05	0.00406776
IFI44L	2.09159	0.462428	3.72076	1.69065	0.455227	3.94774	7.88939e-05	0.00419225
CDH8	6.13945	7.49794	4.78097	-0.555804	0.322229	-3.94628	7.93754e-05	0.00420918
SSPN	2.39039	1.48663	3.29414	0.788176	0.352257	3.93888	8.18621e-05	0.00433215
PDP1	65.1579	43.9641	86.3517	0.958064	0.268281	3.9381	8.21295e-05	0.00433741
BMP3	0.291507	0.506224	0.0767895	-0.484201	0.672506	-3.93006	8.49256e-05	0.0044695
CANX	323.811	209.274	438.349	1.0631	0.340587	3.92991	8.49767e-05	0.0044695
DAB2IP	37.8692	24.2832	51.4552	1.0529	0.280409	3.92313	8.74053e-05	0.00458789
MFAP5	27.7681	38.4581	17.0782	-1.12607	0.311922	-3.91606	9.00089e-05	0.00471497
SRPX	5.99796	3.12634	8.8696	1.25813	0.346852	3.91433	9.06567e-05	0.00473748
CASP4	237.038	158.483	315.594	0.989224	0.264239	3.91393	9.08056e-05	0.00473748
APBA1	0.256907	0.054998	0.458816	0.467558	0.78398	3.9078	9.31398e-05	0.00484946
RPL41P2	32.3513	17.6365	47.066	1.36688	0.43597	3.90427	9.45101e-05	0.00491091
MME	10.3836	13.835	6.93228	-0.903197	0.305509	-3.89678	9.74793e-05	0.00505502
PPP1R18	31.7989	22.0615	41.5363	0.883208	0.26645	3.89465	9.83387e-05	0.00508937
TSEN34	21.4287	11.5089	31.3485	1.37074	0.395277	3.8931	9.8973e-05	0.00511195
ZNF251	4.00398	3.19914	4.80882	0.46815	0.756963	3.88512	0.000102279	0.00527217
CCDC80	12.1176	17.1066	7.12852	-1.15545	0.25418	-3.8763	0.000106058	0.00545607
GDF6	0.614665	1.01841	0.210921	-0.737115	0.563409	-3.86324	0.000111893	0.00573991
SH3KBP1	6.82876	3.69509	9.96242	1.22334	0.286307	3.86296	0.00011202	0.00573991
BACH1	66.1731	39.7803	92.5657	1.19811	0.253824	3.85996	0.000113408	0.00579951
GSTO1	203.414	145.671	261.157	0.837847	0.260314	3.85645	0.000115046	0.00586057
SLFN12	27.359	18.9614	35.7567	0.880792	0.262088	3.84993	0.000118151	0.0059946
SP140	4.44436	1.7674	7.12132	1.55318	0.632261	3.84748	0.00011934	0.00604307
TNFAIP3	30.129	21.6861	38.572	0.802671	0.254216	3.84096	0.000122554	0.00619368
CYP26A1	1.20851	1.99391	0.423117	-1.07297	0.722895	-3.84003	0.000123018	0.00619608
DUSP7	29.328	21.495	37.1611	0.762497	0.232037	3.83991	0.000123082	0.00619608
HLA-DRB3	0.276101	0	0.552202	0.634316	1.81947	3.83835	0.000123864	0.00622333
LST1	2.62621	0.862209	4.3902	1.53333	0.644779	3.83514	0.000125495	0.00629302
RAB43	5.48928	3.02878	7.94979	1.15151	0.360044	3.83177	0.000127226	0.00636747
CLSTN3	28.656	20.4977	36.8143	0.814751	0.294443	3.8269	0.000129766	0.00648203
PSMA5	189.708	140.575	238.84	0.760506	0.232463	3.82453	0.00013102	0.00653204
TPRN	17.7788	11.3072	24.2503	1.0368	0.319031	3.82312	0.000131776	0.00655707
USF1	48.9337	34.7882	63.0793	0.840375	0.249508	3.82168	0.000132545	0.00658264
FOSL1	125.082	76.9784	173.186	1.15949	0.263476	3.82049	0.000133187	0.00660185
CNTNAP2	1.84339	2.70487	0.98191	-0.902531	0.357089	-3.81752	0.0001348	0.00666899
IFIT1	47.6377	32.7221	62.5532	0.914272	0.257789	3.81316	0.0001372	0.00677476
AC009244.1	29.8919	0	59.7838	5.92561	2.50781	3.81113	0.000138335	0.00681773
CYLD	41.8755	28.7793	54.9717	0.910388	0.235461	3.81029	0.000138803	0.0068278
FP565260.3	4.41538	2.57659	6.25418	1.02023	0.341771	3.80515	0.000141719	0.00695797
GABRE	92.0164	121.235	62.7978	-0.938078	0.237902	-3.80445	0.000142121	0.00696445
MXRA5Y	0.321514	0.0956015	0.547427	0.498148	0.684879	3.79431	0.000148054	0.00724149
GCH1	11.567	8.07853	15.0556	0.822542	0.266548	3.79325	0.000148686	0.00725864
KDR	0.333221	0.0857305	0.580712	0.541908	0.650288	3.7907	0.000150222	0.00731977
PARP8	52.2837	35.6656	68.9018	0.930902	0.316578	3.78985	0.000150741	0.00733121
DCHS1	0.282547	0.133061	0.432032	0.337839	0.472883	3.78759	0.000152118	0.00738429
KLF6	46.6554	29.7229	63.5879	1.07195	0.233707	3.77882	0.000157576	0.00763488
AC116533.1	1523.27	1173.22	1873.33	0.674668	0.252971	3.76472	0.000166733	0.00806344
LIPA	242.857	301.332	184.382	-0.705629	0.267578	-3.76407	0.000167172	0.00806956
KLHL24	8.27689	10.8195	5.7343	-0.811567	0.276116	-3.76326	0.00016771	0.00808044
HAS3	66.252	46.36	86.1441	0.879734	0.230248	3.76163	0.000168812	0.00811836
SQOR	70.1598	52.1835	88.136	0.745029	0.24402	3.74922	0.000177386	0.00851487
ZMYND15	2.45515	1.45503	3.45526	0.859771	0.394324	3.74541	0.000180102	0.0086292
ST5	95.8326	78.8391	112.826	0.511665	0.25804	3.7445	0.000180756	0.00864447
TMEM200A	3.03083	1.77116	4.2905	0.932914	0.373669	3.74158	0.000182864	0.00872912
BCAR1	10.6533	6.71483	14.5917	1.01507	0.318675	3.73376	0.000188639	0.0089882
ARL14	5.77766	8.57978	2.97554	-1.26884	0.373609	-3.73302	0.000189197	0.00899819
USP42	25.3392	19.5526	31.1258	0.644417	0.23284	3.7262	0.000194387	0.00922804
NT5C3A	164.315	108.138	220.493	1.0211	0.320256	3.71318	0.000204671	0.00969838
LMO7	138.985	91.5108	186.459	1.01888	0.256183	3.70638	0.000210242	0.00994414
HCAR3	7.32396	4.80156	9.84636	0.902698	0.310071	3.70449	0.000211814	0.0100002
CLIC5	0.26952	0.051196	0.487845	0.501192	0.995716	3.69635	0.000218724	0.0103076
EDARADD	23.8269	17.6631	29.9907	0.731649	0.250829	3.69493	0.000219951	0.0103465
LONRF1	4.782	3.0693	6.49468	0.881085	0.342741	3.69115	0.00022324	0.0104821
CNTN1	81.3047	106.668	55.9419	-0.919019	0.305533	-3.66911	0.000243397	0.0114079
CPNE8	11.937	6.43719	17.4368	1.30976	0.377057	3.66291	0.000249369	0.0116475
DAAM1	64.1335	82.6835	45.5836	-0.845123	0.269252	-3.66286	0.000249413	0.0116475
VEGFA	36.7723	28.0394	45.5052	0.679378	0.28243	3.65647	0.000255716	0.0119203
VSNL1	135.357	92.2467	178.468	0.944598	0.25631	3.65036	0.000261869	0.0121851
AC007326.5	28.4994	21.0837	35.9151	0.741224	0.245198	3.63718	0.000275634	0.0127823
SIX1	16.1543	12.228	20.0806	0.672324	0.261746	3.63713	0.000275692	0.0127823
FOS	3.0202	1.83098	4.20941	0.87982	0.428216	3.63183	0.000281419	0.0130244
KLHDC7B	0.252113	0.0374385	0.466788	0.499635	1.03111	3.62991	0.000283515	0.013098
AC008393.2	6.64435	0.237158	13.0515	3.50563	2.46342	3.62749	0.000286185	0.0131977
FAM103A2P	29.8388	14.5341	45.1435	1.57069	0.535157	3.62487	0.000289108	0.0133088
AKR1B10	2.4186	3.96959	0.86761	-1.41193	0.51709	-3.62336	0.000290799	0.0133628
BCL3	6.72503	3.79552	9.65455	1.15171	0.364375	3.61672	0.000298364	0.0136857
S100A2	1768.88	1241.32	2296.45	0.887006	0.301185	3.61626	0.000298886	0.0136857
TLDC2	1.62217	0.639934	2.60441	1.13613	0.586947	3.61302	0.000302654	0.0138337
TGFB1	32.6357	21.5542	43.7171	0.987427	0.26465	3.60184	0.000315972	0.0144169
FRAS1	3.67434	2.76421	4.58447	0.569073	0.252136	3.60103	0.000316958	0.0144364
C4B	0.0719547	0	0.143909	0.193973	1.86109	3.59814	0.000320506	0.0145497
JADE2	65.3207	48.7674	81.8739	0.735715	0.243627	3.59808	0.000320573	0.0145497
COL27A1	8.25522	6.11339	10.397	0.68005	0.259232	3.59544	0.000323847	0.0146725
TOP1	129.264	95.4246	163.103	0.767128	0.243776	3.59432	0.000325234	0.0146976
LYN	39.8655	26.3158	53.4152	0.994274	0.244794	3.59408	0.000325538	0.0146976
ADPRHL2	17.4907	11.7264	23.2551	0.930464	0.309036	3.593	0.000326894	0.014733
RNF31	18.5221	13.4948	23.5493	0.760139	0.299994	3.58656	0.000335063	0.0150749
P2RY6	1.73919	0.907971	2.57041	0.904048	0.446018	3.57565	0.000349356	0.0156768
RHEBP1	1.29816	2.59632	0	-1.84652	1.82267	-3.57543	0.000349654	0.0156768
HIST1H4C	697.126	942.96	451.292	-1.06147	0.226266	-3.57195	0.000354337	0.0158592
MTND5P28	1.39654	0.578021	2.21507	1.02673	0.580224	3.56234	0.000367563	0.0164098
RPL21P119	3.20194	0.48614	5.91773	2.21873	1.09143	3.56201	0.000368021	0.0164098
MTMR10	1.40423	0.0658185	2.74264	1.8121	1.01368	3.56164	0.000368545	0.0164098
XKRX	0.427201	0.765177	0.089225	-0.696511	0.848595	-3.55889	0.000372427	0.0165541
TMEM54	43.2791	27.5232	59.035	1.07367	0.35179	3.55472	0.000378375	0.0167896
TLR4	0.981151	0.427	1.5353	0.829172	0.46864	3.5498	0.00038552	0.0170773
NAV2	7.24907	5.59659	8.90154	0.585931	0.240342	3.54497	0.000392654	0.0173635
TEAD4	47.0667	34.6981	59.4353	0.759546	0.248812	3.53871	0.000402086	0.0177502
FYN	3.17927	4.19613	2.16242	-0.716409	0.432537	-3.53569	0.000406709	0.0179137
OPALIN	0.112308	0	0.224616	0.292329	1.87254	3.53539	0.000407177	0.0179137
GABARAPL1	69.8744	45.4899	94.2589	1.03494	0.230183	3.5225	0.000427496	0.0187757
BDNF	4.91294	6.63331	3.19257	-0.864473	0.276938	-3.52087	0.000430139	0.0188597
AL512785.2	7.00435	4.70994	9.29876	0.850923	0.447329	3.51722	0.00043609	0.0190882
CARD6	8.30812	6.33354	10.2827	0.621528	0.263174	3.51438	0.000440776	0.0192607
IFNAR2	25.9889	18.1676	33.8102	0.860838	0.255116	3.50647	0.00045409	0.0197755
SHISA5	59.4004	42.5009	76.3	0.829423	0.26239	3.50188	0.000461982	0.0200853
LDLR	88.0118	68.3405	107.683	0.648358	0.245308	3.50124	0.000463092	0.0200915
CREG2	33.1205	42.2768	23.9642	-0.793736	0.274045	-3.50091	0.00046368	0.0200915
CALM3	225.603	145.808	305.399	1.06149	0.265596	3.49641	0.000471557	0.0203649
KRT81	12.6661	17.4733	7.8589	-1.06024	0.295822	-3.49641	0.000471566	0.0203649
TCP11L2	13.5791	17.3205	9.83777	-0.757391	0.282088	-3.49535	0.000473439	0.0204116
KRT6C	1.17908	0.584658	1.7735	0.807537	0.514357	3.49431	0.000475295	0.0204575
UGDH	66.304	40.9289	91.6792	1.1443	0.252463	3.49379	0.000476218	0.0204631
DNPEP	63.6722	44.438	82.9064	0.884881	0.256707	3.4923	0.000478878	0.0205432
ARHGAP20	0.189551	0.0637975	0.315304	0.306173	0.800679	3.4906	0.000481929	0.0206398
MTND4P26	0.874115	0.239259	1.50897	1.01762	0.801535	3.48746	0.000487625	0.0208492
NKX1-2	3.7833	5.24048	2.32612	-0.907819	0.307178	-3.48461	0.000492854	0.021038
C2orf27A	1.63068	0.666405	2.59496	1.10923	0.646159	3.48286	0.000496094	0.0211309
CARD17	1.74403	0.0857995	3.40226	2.01949	1.6966	3.4825	0.000496754	0.0211309
PPP1R15A	38.1215	27.5218	48.7212	0.801796	0.269107	3.48211	0.000497486	0.0211309
GSTK1	208.753	163.459	254.048	0.633038	0.229252	3.48079	0.00049994	0.0212002
ADGRA3	32.4115	38.919	25.9039	-0.569258	0.234726	-3.47878	0.000503703	0.0213248
FBXL14	7.67403	5.63504	9.71303	0.691189	0.317153	3.47737	0.000506353	0.0214019
ISY1-RAB43	9.56751	6.63682	12.4982	0.821721	0.289336	3.47405	0.000512665	0.0216097
ZNF618	11.4786	8.21529	14.7418	0.772503	0.238125	3.47391	0.000512942	0.0216097
DDX60L	24.4397	18.4254	30.4539	0.695295	0.334122	3.46805	0.000524247	0.02205
TLCD2	10.0472	7.49402	12.6003	0.679118	0.24461	3.46366	0.000532878	0.0223765
NT5E	46.0738	29.1877	62.9599	1.08321	0.263581	3.46273	0.00053473	0.0224031
GJD3	3.5636	1.72456	5.40264	1.23264	0.524926	3.46247	0.000535246	0.0224031
FBXO39	0.557607	0.08308	1.03213	0.907855	1.07508	3.45474	0.000550817	0.0230176
KRT8	879.386	684.303	1074.47	0.650153	0.247406	3.45401	0.00055232	0.0230431
SOD2	168.031	100.889	235.173	1.21284	0.232868	3.45319	0.000553994	0.0230756
ABCA12	2.04149	2.91537	1.16761	-0.853044	0.338311	-3.44592	0.000569119	0.0236675
LILRA6	0.333591	0.0470415	0.62014	0.6298	1.16336	3.43875	0.0005844	0.0242639
SPTBN1	185.312	142.952	227.671	0.667681	0.232503	3.43624	0.000589858	0.024412
PDGFRA	1.46761	0.953395	1.98184	0.610217	0.792658	3.43525	0.000591999	0.0244614
ARRDC3	28.1354	35.4796	20.7912	-0.743342	0.252781	-3.43414	0.000594438	0.0245229
ADAM8	29.8177	19.2483	40.3869	1.03137	0.294621	3.43084	0.000601711	0.0247834
ARF3	245.088	162.859	327.316	1.00263	0.224341	3.42369	0.000617772	0.0253912
TMEM219	27.8365	19.9128	35.7602	0.813757	0.307353	3.42335	0.000618548	0.0253912
DKK3	51.6893	40.2874	63.0911	0.634425	0.24404	3.42297	0.000619417	0.0253912
SFN	798.91	571.017	1026.8	0.845433	0.286614	3.42096	0.000624004	0.0255387
PDGFC	10.1613	13.5743	6.74821	-0.911492	0.307619	-3.42024	0.000625651	0.0255656
CCL8	0.302152	0	0.604304	0.681948	1.89672	3.41941	0.000627561	0.0256031
CXCL1	31.4726	41.9909	20.9542	-0.969536	0.260685	-3.41664	0.000633989	0.0257636
PCDH7	42.0874	32.4405	51.7343	0.657144	0.230182	3.41663	0.000634022	0.0257636
AL513165.2	0.186795	0	0.37359	0.457952	1.90613	3.41615	0.000635131	0.0257636
CYP4F3	11.5821	14.2248	8.93932	-0.615208	0.288158	-3.416	0.000635485	0.0257636
HSD3B7	7.9917	4.89766	11.0857	1.03509	0.361917	3.41422	0.000639639	0.0258913
TTLL11	10.4714	7.97956	12.9632	0.636909	0.277192	3.41162	0.000645776	0.0260989
FAM172A	13.0061	14.3921	11.6201	-0.286472	0.305339	-3.40689	0.000657083	0.02649
KCTD15	9.95525	6.74035	13.1701	0.872384	0.266011	3.40671	0.000657506	0.02649
NUDCD1	50.9017	34.0999	67.7035	0.968919	0.290446	3.39976	0.000674445	0.0271301
EFNA5	18.0482	19.8377	16.2587	-0.271868	0.259862	-3.39907	0.000676162	0.0271569
PSG5	6.03549	9.02396	3.04702	-1.30852	0.436009	-3.39451	0.000687522	0.0275629
ITGB1P1	57.0352	43.0735	70.997	0.708027	0.274609	3.39416	0.000688406	0.0275629
MAP1B	3.69693	2.51935	4.87451	0.739161	0.274926	3.38973	0.000699614	0.0279683
FBXO32	3.86111	5.61096	2.11127	-1.08736	0.390697	-3.38924	0.000700862	0.0279749
ETV6	22.8038	17.2171	28.3904	0.690052	0.24542	3.38616	0.000708793	0.0282478
ZNF672	20.7612	15.1067	26.4156	0.767339	0.271272	3.38555	0.000710365	0.0282668
IL15	9.28742	5.09441	13.4804	1.24855	0.316725	3.38433	0.000713522	0.0283488
ZNF296	6.56867	4.47178	8.66555	0.820841	0.328287	3.36974	0.000752382	0.0298468
AC012184.2	9.85434	7.48897	12.2197	0.639029	0.444227	3.36504	0.000765332	0.030314
LMF2	11.8169	7.64058	15.9932	0.975757	0.326878	3.3632	0.000770443	0.0304697
RPS17	1369.29	2021.84	716.738	-1.49485	0.374523	-3.36261	0.000772097	0.0304884
CDH2	25.3868	34.538	16.2356	-1.04397	0.309325	-3.36193	0.000774003	0.030517
RDH10	21.4946	27.2704	15.7187	-0.75783	0.241789	-3.36053	0.000777918	0.0306246
CAVIN2	2.0409	2.92119	1.16061	-0.859856	0.366273	-3.35677	0.000788581	0.0309608
SDCBP2	6.13515	3.63712	8.63318	1.05479	0.400806	3.35668	0.000788856	0.0309608
MINOS1-NBL1	2.36372	0.915761	3.81169	1.32862	0.666945	3.35431	0.000795618	0.0311442
ZNF267	38.6087	25.0091	52.2084	1.03264	0.33418	3.35412	0.000796184	0.0311442
EHD1	62.1457	36.0174	88.2738	1.27003	0.269104	3.35378	0.000797147	0.0311442
PLEK2	41.4819	33.9605	49.0034	0.516302	0.254013	3.35251	0.000800818	0.0312225
S100A3	17.5961	11.0942	24.0981	1.05327	0.374472	3.35219	0.000801749	0.0312225
PJA1	26.0333	20.9572	31.1093	0.548296	0.247596	3.35184	0.000802778	0.0312225
PLSCR4	11.8383	7.59762	16.0789	0.990205	0.340307	3.35024	0.000807418	0.0313409
DENND1A	46.693	34.056	59.3299	0.783209	0.247616	3.34995	0.00080825	0.0313409
SLC9A9	10.2834	8.58723	11.9795	0.437045	0.310026	3.34091	0.000835054	0.0322644
ABCD1	1.11693	0.60416	1.6297	0.713082	0.569334	3.34083	0.000835269	0.0322644
MGRN1	41.7099	29.4304	53.9894	0.853642	0.269292	3.34065	0.000835813	0.0322644
TMED7-TICAM2	6.10099	4.44006	7.76192	0.687623	0.282614	3.33803	0.00084376	0.0325046
DEPP1	7.68408	7.01205	8.35611	0.223737	0.344739	3.33776	0.000844554	0.0325046
GOLM1	128.073	100.8	155.346	0.619002	0.226088	3.33517	0.000852464	0.0327602
C1orf68	0.722361	0.0872275	1.35749	1.1166	1.23475	3.33406	0.000855888	0.032843
AZIN2	4.55602	3.28728	5.82477	0.670718	0.353186	3.33146	0.000863917	0.0331019
HERC6	5.89938	3.92419	7.87457	0.849791	0.294593	3.32842	0.000873387	0.0334152
S100A13	271.817	191.18	352.453	0.879056	0.310649	3.31899	0.000903446	0.034514
ITGA3	162.552	127.091	198.012	0.635696	0.276405	3.31741	0.000908574	0.0346587
AP000812.5	0.389462	0.0857	0.693223	0.641146	0.955109	3.31593	0.000913376	0.0347905
SYNE1	5.43008	7.74829	3.11187	-1.0892	0.274484	-3.31463	0.000917629	0.034901
TSTA3	53.4689	35.939	70.9988	0.962828	0.265604	3.30549	0.000948089	0.0360065
VGLL1	2.92577	4.63368	1.21788	-1.3449	0.511451	-3.30444	0.000951677	0.0360897
AL035078.4	5.89314	0	11.7863	3.67652	3.17782	3.30048	0.000965212	0.0365493
ZNF608	1.16829	1.85065	0.485934	-0.939923	0.509686	-3.29981	0.00096751	0.0365826
HDAC4	17.1454	12.2689	22.022	0.794967	0.247886	3.29828	0.000972792	0.0367286
SEPHS2	58.8806	45.5375	72.2237	0.653918	0.234305	3.29748	0.000975562	0.0367794
CMTR1	18.2826	13.7761	22.789	0.687024	0.272985	3.29556	0.000982261	0.036978
RPS7P1	6.60201	2.35097	10.853	1.82261	0.743347	3.29461	0.000985597	0.0370496
OTUD4	37.5538	30.5123	44.5953	0.53297	0.264607	3.29312	0.000990813	0.0371915
CCL7	0.898383	0.108251	1.68851	1.27852	1.24921	3.29118	0.000997691	0.0373953
HK1	134.755	103.965	165.546	0.666015	0.243434	3.28798	0.00100908	0.0377673
FBXO7	54.5089	41.2496	67.7682	0.702804	0.233063	3.28358	0.00102497	0.0383067
TRIM5	44.5341	31.483	57.5851	0.850847	0.244698	3.27595	0.00105309	0.0393006
PLAU	43.4976	32.2966	54.6985	0.742261	0.258085	3.27525	0.00105567	0.0393401
CR1L	1.33984	0.176382	2.5033	1.57436	1.07859	3.27119	0.00107094	0.0398518
USP18	28.4068	21.4718	35.3419	0.693519	0.253812	3.27076	0.0010726	0.0398559
AC040162.1	4.30488	2.61488	5.99489	0.952354	0.304758	3.26726	0.00108593	0.0402934
PRKD2	56.3868	37.8582	74.9154	0.966171	0.27361	3.26358	0.00110014	0.0407618
ITGB4	166.878	125.576	208.179	0.724738	0.258115	3.26187	0.00110679	0.0409207
RMDN3	50.3973	36.2819	64.5126	0.813298	0.256789	3.26164	0.00110769	0.0409207
AC241585.2	48.6144	32.2311	64.9978	0.989884	0.26215	3.26084	0.00111081	0.0409207
KIFC1	25.0717	18.9376	31.2057	0.691827	0.258519	3.26069	0.0011114	0.0409207
SEPT6	6.36621	4.56076	8.17166	0.721901	0.301863	3.26045	0.00111234	0.0409207
NOD1	30.7817	23.4156	38.1477	0.681121	0.256647	3.25708	0.00112566	0.0413517
CKAP4	131.801	101.823	161.779	0.662749	0.243794	3.25278	0.00114284	0.0419229
SLC6A2	3.41121	5.18849	1.63393	-1.23237	0.371905	-3.24834	0.0011608	0.0425214
LHFPL2	20.6609	27.0443	14.2776	-0.87629	0.243438	-3.24688	0.00116676	0.0425848
CXCL6	2.24135	3.40048	1.08221	-1.07954	0.503202	-3.24659	0.00116796	0.0425848
CERK	5.81683	7.46646	4.1672	-0.712376	0.278137	-3.24635	0.00116897	0.0425848
C6orf136	0.664503	1.32901	0	-1.21971	1.91917	-3.24631	0.00116912	0.0425848
FYB1	33.2615	24.7461	41.7769	0.732483	0.272066	3.24402	0.00117856	0.042868
GUCD1	51.2561	37.2157	65.2964	0.794765	0.235116	3.24323	0.00118181	0.0429258
RFLNB	1.60018	2.38912	0.811234	-0.903938	0.449256	-3.24168	0.00118828	0.0431
TVP23C-CDRT4	2.34822	1.60773	3.08871	0.648848	0.39359	3.24108	0.00119077	0.0431301
GRAMD1B	0.790948	0.487467	1.09443	0.493699	0.512139	3.22735	0.00124942	0.0451909
GRIK2	5.29755	6.96941	3.62568	-0.784805	0.352846	-3.22175	0.00127412	0.0459553
GAS8	61.9054	45.9256	77.8852	0.749382	0.267667	3.22106	0.00127717	0.0460012
CLPTM1L	50.1439	33.9965	66.2913	0.943212	0.400743	3.21973	0.00128311	0.0461508
PRDM8	3.9219	2.02778	5.81602	1.17067	0.372423	3.21776	0.00129198	0.0464053
HSPA5	364.231	279.906	448.557	0.678418	0.24169	3.2156	0.00130173	0.0466831
SPC25	15.6683	21.0684	10.2681	-0.969738	0.284067	-3.21525	0.00130333	0.0466831
F2RL1	45.0231	32.539	57.5072	0.802773	0.264845	3.21346	0.00131147	0.0468878
SYTL2	14.8196	20.1575	9.48171	-1.0133	0.259178	-3.21319	0.00131268	0.0468878
LRRC61	31.521	23.3464	39.6957	0.741173	0.317761	3.21239	0.00131634	0.0469538
KRT18	731.41	547.54	915.28	0.740192	0.263278	3.21187	0.00131872	0.0469737
AL121900.2	0.58894	0	1.17788	1.12292	1.9874	3.21096	0.00132292	0.0470219
HLA-DQA1	2.79326	1.30344	4.28308	1.19759	0.346179	3.21079	0.00132371	0.0470219
C20orf141	0.572068	0	1.14414	1.1004	1.96406	3.20742	0.00133932	0.0475107
AC020898.1	5.86573	2.60835	9.12311	1.48824	0.625635	3.20656	0.00134331	0.0475872
RIMBP3C	29.857	19.3953	40.3186	1.01856	0.356954	3.20495	0.00135084	0.0477884
DNAJC1	34.0477	26.0621	42.0333	0.669177	0.238177	3.20447	0.0013531	0.0478026
DLGAP4	44.0225	30.7087	57.3362	0.879512	0.231816	3.1966	0.00139056	0.0490589
GNA15	32.1012	23.5758	40.6266	0.760267	0.281509	3.19353	0.00140544	0.0495165
ATP8A1	3.68133	5.90196	1.4607	-1.48794	0.348269	-3.19056	0.00141996	0.0499597
ACOT7	97.738	70.0186	125.457	0.832383	0.299531	3.18594	0.00144283	0.0506953
NFKBIA	70.3084	51.3475	89.2692	0.786115	0.279657	3.18366	0.00145426	0.0510276
SLC25A47P1	1.259	0	2.51799	1.81475	1.97648	3.18297	0.00145775	0.0510804
FAM198B	2.31656	3.19848	1.43464	-0.786157	0.414652	-3.18236	0.00146081	0.0511183
C15orf41	48.7426	64.4084	33.0768	-0.940686	0.279059	-3.18134	0.00146597	0.0512296
SPHK1	24.0885	17.5426	30.6345	0.770653	0.311092	3.17994	0.00147306	0.0514078
RPL7P9	2.24413	0.862529	3.62574	1.31242	0.716067	3.1792	0.00147685	0.0514704
SLC37A3	27.4113	21.0002	33.8225	0.662503	0.245887	3.17701	0.00148803	0.0517901
RPS6KA4	60.745	40.0714	81.4185	1.00483	0.304002	3.17388	0.00150416	0.0522811
TMEM45B	18.2621	24.8769	11.6474	-1.03283	0.27268	-3.17289	0.0015093	0.0523892
SGPP2	1.9671	1.27578	2.65843	0.684867	0.366638	3.17009	0.00152392	0.0528258
LPCAT1	16.5874	10.9027	22.2721	0.967313	0.438038	3.16792	0.00153536	0.0531225
GNE	6.45795	7.65107	5.26483	-0.465603	0.265598	-3.16768	0.00153659	0.0531225
TGIF2-C20orf24	2.07586	0.887221	3.26449	1.17611	0.644123	3.16682	0.00154118	0.0532098
PLCE1	5.51095	7.0485	3.97338	-0.694493	0.264395	-3.16402	0.00155609	0.0536528
MAPK15	0.484227	0.968454	0	-0.977063	1.93038	-3.16249	0.00156427	0.053863
BMF	1.59498	1.84081	1.34916	-0.274155	0.515688	-3.15367	0.00161231	0.0554434
BLVRA	116.603	90.5114	142.694	0.650976	0.257163	3.15256	0.00161843	0.0555797
SLC28A3	0.222389	0.076946	0.367831	0.344945	1.17585	3.14185	0.00167886	0.057435
SEPT4	2.09805	1.44659	2.74951	0.61593	0.493396	3.1418	0.00167913	0.057435
AL049629.2	7.60819	4.7861	10.4303	0.982197	0.465286	3.13316	0.00172933	0.059063
ZNF100	0.613665	1.04235	0.184983	-0.785361	0.757391	-3.13283	0.0017313	0.059063
ADGRF3	2.90777	2.08845	3.72709	0.614069	0.384201	3.13022	0.00174675	0.0595118
PDCD4	108.21	129.927	86.4938	-0.581511	0.249666	-3.12973	0.00174965	0.0595318
CD82	47.6718	31.0995	64.2442	1.0233	0.302215	3.12873	0.00175561	0.059656
ZC3H7B	21.9796	16.5674	27.3918	0.692578	0.262142	3.12651	0.00176896	0.0599526
UGT1A10	0.863494	0	1.72699	1.44731	2.81459	3.1265	0.00176898	0.0599526
NTRK2	1.34712	1.84232	0.851913	-0.618052	0.342272	-3.1258	0.00177324	0.0600182
RASSF6	4.95632	6.27112	3.64153	-0.64758	0.369667	-3.12365	0.00178622	0.0603257
BMS1P17	1.06552	2.09191	0.0391385	-1.57311	1.72082	-3.12352	0.00178699	0.0603257
FCGR2A	3.79553	1.64756	5.94351	1.391	0.469323	3.12131	0.00180047	0.060687
ALDH7A1	117.217	99.0497	135.384	0.446958	0.229973	3.121	0.0018024	0.060687
NSFL1C	188.318	143.388	233.248	0.698086	0.232898	3.11916	0.0018137	0.0609743
NAPA	53.1718	41.6662	64.6773	0.6223	0.271415	3.11884	0.00181565	0.0609743
GSTA4	2.66746	4.06449	1.27044	-1.15745	0.485756	-3.118	0.00182086	0.0610696
HEG1	16.8203	13.3946	20.246	0.561665	0.234861	3.1175	0.00182392	0.061093
BMP4	17.1626	22.6502	11.675	-0.899867	0.276224	-3.11705	0.00182668	0.0611061
SYDE2	7.7207	10.0826	5.35874	-0.80149	0.266729	-3.1139	0.0018463	0.0616827
CADPS2	7.8473	5.7705	9.92411	0.690182	0.260714	3.11114	0.00186365	0.0621819
AL162417.1	0.086394	0.172766	2.2e-05	-0.229883	1.94616	-3.10943	0.00187446	0.0624618
FAM78B	0.789433	0.300636	1.27823	0.808696	0.556691	3.1084	0.00188104	0.0626005
SSBP4	28.0867	20.6683	35.5052	0.752516	0.325829	3.10578	0.00189775	0.062994
MICB	7.1134	4.91312	9.31367	0.802567	0.3319	3.10036	0.00193289	0.064078
MTCL1	22.5388	19.5737	25.5038	0.365398	0.271649	3.09828	0.00194648	0.0643477
LY75	6.50723	4.44383	8.57063	0.813993	0.352138	3.09823	0.00194677	0.0643477
MAFF	8.42345	6.14875	10.6981	0.710517	0.295046	3.0978	0.00194961	0.0643477
MFSD12	36.4113	27.3656	45.4569	0.71175	0.277742	3.09759	0.00195099	0.0643477
URGCP-MRPS24	4.95408	2.7292	7.17896	1.13305	0.508985	3.09674	0.00195663	0.0644515
RARS	211.347	173.742	248.952	0.516422	0.235611	3.09559	0.00196419	0.0646182
GANC	50.1379	38.2446	62.0311	0.68357	0.238618	3.09502	0.00196803	0.0646619
AC026464.3	0.813314	0	1.62663	1.39321	2.07449	3.08887	0.00200921	0.0659312
FGFR2	25.3422	32.2383	18.446	-0.773373	0.238552	-3.08669	0.00202398	0.0663316
BCR	105.743	75.2197	136.266	0.848738	0.279882	3.08504	0.00203522	0.0666156
MYO1G	0.965805	0.543915	1.38769	0.629025	0.511117	3.08095	0.00206339	0.0674519
KLF12	5.5267	7.33188	3.72152	-0.819391	0.337648	-3.07736	0.00208844	0.0681844
PTMS	253	162.662	343.338	1.0731	0.368595	3.07359	0.00211497	0.0689634
MPHOSPH6	183.675	144.433	222.918	0.622621	0.267447	3.07077	0.00213506	0.0694433
ZFP36	17.42	12.7927	22.0475	0.740707	0.264703	3.06924	0.00214604	0.0696562
TP53INP1	1.19741	1.7073	0.687521	-0.681947	0.393738	-3.06911	0.002147	0.0696562
CASP8	74.9288	53.8537	96.004	0.822456	0.267828	3.0678	0.00215642	0.0698741
TLE4	73.9856	57.4415	90.5296	0.647243	0.234204	3.06693	0.0021627	0.0699896
NR1D1	16.3287	12.5268	20.1307	0.64352	0.25883	3.06523	0.00217503	0.0702537
AC007192.1	0.257543	0.104899	0.410188	0.351974	0.675917	3.06505	0.0021763	0.0702537
SLITRK6	1.65609	2.08262	1.22955	-0.467401	0.449747	-3.06419	0.00218264	0.0703703
CARD16	39.9108	28.0214	51.8001	0.863424	0.33319	3.0569	0.0022364	0.0719241
COQ8B	19.8688	15.5351	24.2024	0.608025	0.317184	3.04747	0.00230773	0.0741258
TUBB3	88.746	69.0294	108.463	0.644403	0.25495	3.04696	0.00231172	0.0741617
ADRM1	122.065	90.9626	153.168	0.745383	0.288671	3.04533	0.00232423	0.0744705
PTPRB	13.6697	17.3762	9.96311	-0.745186	0.238922	-3.04095	0.00235837	0.0754706
EREG	8.48246	11.4598	5.50513	-0.937631	0.337401	-3.03316	0.00242005	0.0773487
KCTD7	2.47517	3.3036	1.64674	-0.701328	0.32677	-3.03104	0.00243714	0.0777986
DKK1	286.314	344.817	227.811	-0.595849	0.265188	-3.02988	0.00244647	0.0780002
LYPD6B	15.8457	12.806	18.8853	0.526411	0.293434	3.02782	0.00246326	0.0784387
RAB31	27.8074	19.0608	36.554	0.904587	0.252301	3.02657	0.00247346	0.0786663
ETS1	47.188	36.5481	57.828	0.647762	0.244765	3.02551	0.00248216	0.0788461
BDKRB2	10.6246	8.05185	13.1974	0.649342	0.257727	3.02372	0.00249687	0.0792157
MIER2	22.5788	15.3735	29.7842	0.910827	0.332775	3.02263	0.00250591	0.0793449
AKR1C2	43.8813	57.4505	30.3122	-0.90049	0.253601	-3.02249	0.00250708	0.0793449
SLC25A47	0.314381	0.027495	0.601268	0.640083	1.51725	3.02023	0.00252585	0.0797649
PPM1L	1.63479	2.06975	1.19983	-0.480724	0.35908	-3.01979	0.00252952	0.0797649
FOXN1	2.83211	4.15125	1.51297	-1.03553	0.441544	-3.01978	0.00252962	0.0797649
PPP1R3B	2.81155	1.91901	3.7041	0.688441	0.299585	3.0193	0.00253364	0.0797941
TMEM40	19.2653	13.1773	25.3532	0.894398	0.27616	3.01301	0.00258671	0.0812429
BCL2L2-PABPN1	18.547	14.4341	22.66	0.616329	0.297247	3.01285	0.00258809	0.0812429
PLEKHG5	8.69083	5.91324	11.4684	0.850843	0.332151	3.01273	0.00258908	0.0812429
PRRC2A	5.66175	4.13701	7.18649	0.672318	0.293192	3.01108	0.00260317	0.081586
WDR45	28.6766	19.8758	37.4774	0.882183	0.296011	3.00747	0.00263431	0.0824619
CERS3	9.18166	6.62337	11.74	0.740859	0.280482	3.00385	0.00266586	0.0832477
AC256203.2	2.2314	1.31824	3.14456	0.838192	0.450169	3.00118	0.00268938	0.0838807
ZNF318	12.4677	9.8833	15.0521	0.560646	0.234941	2.99929	0.00270612	0.084301
ZNF488	23.508	29.8985	17.1175	-0.770155	0.234171	-2.99826	0.00271522	0.0844825
AC012651.1	0.985339	0.532292	1.43839	0.670234	0.522219	2.99737	0.00272318	0.0845419
PCSK5	29.7068	35.5719	23.8418	-0.557966	0.2331	-2.99732	0.00272367	0.0845419
AC006486.1	0.54608	0	1.09216	1.06499	2.03748	2.99641	0.00273183	0.0846933
IRF3	73.2605	52.8685	93.6526	0.813199	0.313375	2.99468	0.00274729	0.0850704
PKNOX2	6.69983	3.96809	9.43157	1.07019	0.454301	2.99133	0.00277765	0.0857467
MEGF9	18.1024	23.4413	12.7636	-0.828465	0.259642	-2.99105	0.00278023	0.0857467
AC064799.1	10.5762	6.28477	14.8676	1.12313	0.492922	2.99093	0.00278131	0.0857467
MCL1	260.423	201.473	319.372	0.662019	0.223944	2.99081	0.00278241	0.0857467
TBC1D30	1.98865	0.987393	2.98991	1.00548	0.484011	2.99003	0.00278948	0.0857973
TM4SF1	188.463	239.222	137.704	-0.792354	0.225611	-2.9899	0.0027907	0.0857973
RHOU	3.36171	4.506	2.21741	-0.775103	0.307731	-2.98929	0.00279625	0.0858411
COL4A1	15.6104	11.9426	19.2782	0.647811	0.252072	2.98902	0.00279877	0.0858411
PTHLH	156.448	191.314	121.582	-0.649713	0.227885	-2.98475	0.00283813	0.0869452
SOX4	4.07263	5.29603	2.84923	-0.709876	0.268201	-2.98303	0.00285414	0.0873321
SAA1	9.10341	5.74836	12.4584	0.995902	0.427966	2.97896	0.00289227	0.0883188
SLC9A7	18.2771	11.6634	24.8908	1.03177	0.242619	2.97886	0.00289323	0.0883188
GSDMD	9.11352	6.57505	11.652	0.740039	0.34502	2.97777	0.00290355	0.0885291
GRIPAP1	35.2158	23.5854	46.8462	0.960603	0.288981	2.97502	0.00292974	0.0892224
IL18R1	5.25014	4.12894	6.37134	0.523265	0.398948	2.97294	0.00294965	0.0897157
DPYD	20.0696	16.2133	23.9258	0.534112	0.248885	2.9726	0.00295289	0.0897157
OPN3	47.6968	60.6397	34.7538	-0.785761	0.257409	-2.9719	0.00295962	0.0898147
MAP3K8	28.3281	23.5253	33.1308	0.476803	0.261572	2.96869	0.00299074	0.0906523
VARS	11.2584	7.26624	15.2505	0.975181	0.411601	2.96808	0.00299671	0.0907267
KANSL1	2.25149	0.170903	4.33207	2.18707	1.84209	2.96697	0.0030075	0.0909471
GDPD3	5.51307	7.55691	3.46924	-0.93706	0.42867	-2.96651	0.00301204	0.0909778
LSM12P1	36.8075	27.6583	45.9567	0.712375	0.324423	2.96548	0.00302208	0.0911744
PRELID1	94.1738	63.5495	124.798	0.962634	0.345007	2.96237	0.00305282	0.0919944
TBC1D9	4.32484	3.54869	5.101	0.423595	0.268443	2.96115	0.00306495	0.0922521
EPOP	3.24412	2.30858	4.17966	0.646644	0.322981	2.95942	0.00308216	0.0926621
MTATP6P26	1.21799	0.243927	2.19205	1.35958	1.14152	2.95876	0.00308883	0.0927547
FLOT1	42.2678	24.7735	59.7621	1.23729	0.319223	2.95836	0.00309281	0.0927662
STMN3	11.4104	7.66364	15.1571	0.899128	0.338875	2.95639	0.0031126	0.0932517
AC023825.1	1.91042	0.912478	2.90835	1.03112	0.619703	2.95266	0.00315044	0.094276
GPRC5A	190.986	223.78	158.19	-0.497763	0.22801	-2.95204	0.00315684	0.0943437
PLCL1	0.315375	0.106643	0.524106	0.461773	0.711729	2.95173	0.00316001	0.0943437
HBEGF	16.4536	12.597	20.3102	0.648259	0.260492	2.95051	0.00317247	0.0946064
COL18A1	21.4275	11.2695	31.5856	1.40916	0.349733	2.94906	0.0031874	0.0949419
MYD88	28.7586	18.4085	39.1086	1.04722	0.242541	2.94861	0.00319208	0.0949716
ZC3HAV1	57.3325	39.7017	74.9633	0.900211	0.254806	2.94701	0.0032086	0.0953535
NDST2	12.5036	9.59426	15.413	0.631552	0.292189	2.94625	0.00321652	0.095479
UGT1A5	10.6611	14.2193	7.1029	-0.909387	0.299664	-2.94576	0.00322161	0.0955203
SORD2P	16.2408	11.4022	21.0794	0.832102	0.363239	2.94307	0.00324971	0.0962425
GSDME	44.1773	34.5385	53.816	0.625214	0.241445	2.94272	0.00325343	0.0962425
AL162726.3	16.9718	4.22029	29.7234	2.55714	0.579759	2.94209	0.00326	0.0963267
SERPINB3	0.572866	0.987853	0.15788	-0.779725	0.888307	-2.94024	0.00327953	0.096793
SMN2	44.5686	37.1336	52.0037	0.475029	0.248787	2.93879	0.00329501	0.0971388
HEXDC	13.8666	11.1811	16.5522	0.527013	0.330425	2.93842	0.00329889	0.0971422
NAGS	1.76133	0.996669	2.52599	0.820433	0.494646	2.93774	0.00330614	0.0972448
MAP7D1	99.0489	76.5637	121.534	0.659728	0.299503	2.93719	0.003312	0.0972489
FKBP4	190.942	135.242	246.643	0.862093	0.243588	2.93702	0.00331381	0.0972489
FAM46A	5.14385	3.55611	6.7316	0.762965	0.316676	2.93423	0.0033438	0.0980178
ATG2A	7.13552	5.74047	8.53058	0.499716	0.323828	2.93295	0.00335763	0.0983115
SAMD9	124.591	82.4313	166.75	1.00766	0.367359	2.93167	0.0033714	0.0986029
PTPRE	10.6457	8.54476	12.7466	0.526293	0.255804	2.92913	0.00339916	0.0993024
TLR3	13.2053	8.23634	18.1742	1.05377	0.379505	2.92691	0.00342343	0.0998985
PELI3	11.7916	8.60687	14.9763	0.733798	0.323457	2.9245	0.00345005	0.100561
BCAR3	63.9875	52.9312	75.0439	0.495711	0.239803	2.92352	0.00346096	0.100654
AC022384.1	2.96244	1.87471	4.05016	0.812913	0.415052	2.92352	0.00346102	0.100654
LPCAT4	45.7788	34.684	56.8736	0.697631	0.270334	2.92291	0.00346771	0.100735
IQCJ-SCHIP1	35.9452	26.6291	45.2612	0.743616	0.256957	2.92157	0.00348268	0.101056
TRIM14	55.4323	44.8971	65.9675	0.54506	0.232868	2.92099	0.00348921	0.101132
KIAA0040	60.2202	48.9851	71.4553	0.535592	0.234055	2.92035	0.00349644	0.101228
MB21D2	11.3426	14.6873	7.99789	-0.801938	0.265618	-2.91848	0.00351743	0.101722
ASB2	0.549128	0.259175	0.839082	0.546507	0.85582	2.91602	0.00354531	0.102391
HNRNPUL2-BSCL2	50.6123	35.6173	65.6073	0.863156	0.333907	2.91574	0.00354851	0.102391
KRT10	74.4411	107.925	40.9567	-1.37637	0.379802	-2.91161	0.0035957	0.103637
ENC1	35.215	28.5201	41.9099	0.539615	0.229246	2.90993	0.00361515	0.104082
STAP2	65.6676	49.4464	81.8887	0.716423	0.274095	2.90909	0.00362486	0.104245
UBB	704.961	527.938	881.984	0.739288	0.248769	2.90734	0.00364514	0.104712
PLEKHF1	7.54122	5.53726	9.54519	0.689828	0.336509	2.90657	0.00365411	0.104853
FER1L6	0.038689	0	0.077378	0.107525	2.06168	2.90247	0.00370231	0.106118
PLCG2	312.661	219.967	405.355	0.87891	0.341135	2.90122	0.00371712	0.106424
PLEKHA4	7.72323	7.50936	7.9371	0.0707561	0.344382	2.90046	0.00372618	0.106566
IFIT5	39.9188	29.4072	50.4305	0.75821	0.303965	2.90004	0.00373118	0.10659
HOXC12	10.4195	13.5077	7.33125	-0.800213	0.268883	-2.89926	0.00374044	0.106737
HNRNPA3P6	2.75731	1.11984	4.39478	1.34761	0.742253	2.89678	0.00377017	0.107466
CLCN4	1.1264	1.30338	0.949428	-0.240702	0.383003	-2.89179	0.00383049	0.109065
ATG101	47.8839	32.4969	63.2709	0.940138	0.313718	2.89126	0.00383701	0.109131
GCSH	66.7668	87.4256	46.108	-0.908491	0.266606	-2.89042	0.00384724	0.109302
CTNNBL1	69.5506	58.1989	80.9024	0.468337	0.252313	2.88542	0.00390894	0.110884
BAZ2A	118.489	93.3371	143.642	0.616585	0.229603	2.88521	0.00391154	0.110884
DHRS3	51.7807	66.1642	37.3972	-0.80669	0.251647	-2.88392	0.00392754	0.111216
ANKFY1	71.3164	60.6162	82.0166	0.43009	0.22503	2.87969	0.00398065	0.112596
ZBED6CL	4.95855	3.71664	6.20047	0.610332	0.293465	2.87492	0.00404132	0.11402
PSEN2	21.2626	15.3001	27.225	0.792093	0.321174	2.87489	0.00404168	0.11402
DYNC1H1	327.581	252.881	402.281	0.667636	0.233293	2.87469	0.00404424	0.11402
MICALL1	38.5985	27.5374	49.6596	0.827978	0.286557	2.87269	0.00406996	0.11462
ECI2	61.7479	47.5588	75.9369	0.663941	0.241178	2.86785	0.00413276	0.116255
CTSC	172.061	125.859	218.263	0.789442	0.234635	2.86752	0.004137	0.116255
SH3BP1	32.387	25.6931	39.0809	0.586448	0.25847	2.86652	0.00415016	0.116498
AC243587.1	46.4532	1.57608	91.3303	5.16356	2.21605	2.86577	0.00415993	0.116645
LSR	107.582	83.2297	131.934	0.658308	0.25453	2.86279	0.00419932	0.117622
FBXL20	8.4883	9.58606	7.39054	-0.335331	0.25259	-2.85839	0.00425797	0.119135
CARHSP1	64.6673	47.8718	81.4627	0.75474	0.260604	2.85761	0.00426839	0.119274
FLT3LG	8.83319	5.83713	11.8293	0.907976	0.38124	2.85733	0.00427217	0.119274
MDFI	19.2923	13.5938	24.9908	0.832653	0.364612	2.85605	0.00428948	0.119628
CENPX	73.7061	57.849	89.5631	0.621903	0.298014	2.85415	0.00431518	0.120086
ERBB4	0.133223	0.244779	0.0216665	-0.284965	0.864905	-2.85308	0.00432972	0.120361
IQSEC3	0.135065	0	0.270129	0.344975	2.09384	2.84776	0.00440278	0.12226
ENKUR	0.767829	0.394614	1.14104	0.618449	0.625828	2.84587	0.00442901	0.122856
KRT17P2	0.541516	0.036187	1.04685	0.982118	1.8905	2.8415	0.00449021	0.12442
HSH2D	2.19102	1.29887	3.08316	0.82876	0.457787	2.83968	0.00451594	0.124999
HMGB1P6	424.241	320.707	527.776	0.716912	0.329975	2.83889	0.00452702	0.125098
CYP1B1	24.6763	31.7293	17.6233	-0.813468	0.283551	-2.83874	0.0045292	0.125098
TCAF2	2.09361	1.35282	2.83439	0.704601	0.326893	2.83837	0.00453446	0.125109
TRIM16L	79.0473	95.0391	63.0554	-0.584302	0.234099	-2.83583	0.00457073	0.125976
AREG	26.5976	20.878	32.3173	0.606788	0.283017	2.83469	0.00458698	0.126289
DNAJC7	181.776	150.227	213.325	0.50308	0.223333	2.83338	0.00460583	0.126673
CARD10	18.9978	14.6842	23.3115	0.632332	0.304365	2.83185	0.00462795	0.127145
PSORS1C1	0.386741	0.240127	0.533354	0.306203	1.06684	2.82905	0.00466861	0.128126
RPS2P5	177.727	133.321	222.133	0.732219	0.320695	2.82831	0.00467942	0.128287
NFASC	15.0542	11.8908	18.2177	0.576099	0.265932	2.82732	0.00469391	0.128547
EIF2S2	202.849	166.043	239.654	0.526737	0.225064	2.82685	0.00470085	0.128601
RMND5A	48.7718	58.6412	38.9025	-0.579832	0.231416	-2.82544	0.00472164	0.129033
GNL1	2.04205	4.0841	0	-2.34599	3.05173	-2.82477	0.00473152	0.129037
S100A14	1214.76	861.544	1567.98	0.863156	0.27812	2.82475	0.00473179	0.129037
FKBP5	9.68534	7.65167	11.719	0.555935	0.249039	2.82072	0.00479159	0.13053
RILP	9.92798	6.93095	12.925	0.812111	0.338181	2.81593	0.00486369	0.132216
G6PC3	52.2573	41.9719	62.5426	0.564329	0.245791	2.80967	0.00495928	0.134672
CCDC68	2.93964	1.5807	4.29859	1.03784	0.490193	2.80795	0.00498578	0.13525
DAG1	68.272	85.5348	51.0091	-0.734516	0.221931	-2.80708	0.00499927	0.135473
C5orf15	56.9963	40.9728	73.0198	0.818457	0.299403	2.80443	0.00504057	0.136308
DOCK8	1.18896	1.52855	0.849377	-0.451268	0.46419	-2.80443	0.00504063	0.136308
AL035460.1	0.133127	0	0.266253	0.340566	2.10101	2.80122	0.00509102	0.137527
LBH	29.9505	17.9591	41.942	1.1795	0.278032	2.79991	0.00511167	0.13794
JUN	9.27549	6.90151	11.6495	0.678876	0.304385	2.79836	0.00513634	0.138461
TNS4	95.0549	77.8287	112.281	0.523113	0.227885	2.79718	0.00515516	0.138824
ZNF598	30.289	20.4489	40.1292	0.939263	0.279097	2.79285	0.00522459	0.140547
LYSMD2	22.9905	17.4125	28.5685	0.683372	0.288625	2.79078	0.00525814	0.141189
RPS29	737.786	983.377	492.195	-0.997053	0.235529	-2.7907	0.00525939	0.141189
RUNX2	6.79466	9.07221	4.51712	-0.868394	0.289094	-2.78729	0.00531517	0.142395
ARHGEF5	20.0773	17.0758	23.0788	0.413704	0.244035	2.78727	0.00531535	0.142395
JMY	4.49266	5.93551	3.04981	-0.776148	0.309875	-2.78441	0.00536252	0.1432
REC8	3.45982	2.31886	4.60079	0.754943	0.486782	2.78432	0.00536409	0.1432
PTPRK	0.290513	0.581025	0	-0.660861	2.05563	-2.78413	0.00536713	0.1432
ACTN2	0.169915	0	0.33983	0.422049	2.10176	2.7841	0.00536758	0.1432
REXO1	13.2749	10.6807	15.8691	0.530256	0.296341	2.78358	0.00537625	0.143283
FAT4	0.992702	0.755497	1.22991	0.345104	0.352631	2.78282	0.00538886	0.143471
XRN1	38.1016	27.2531	48.95	0.822077	0.361131	2.78197	0.00540301	0.143603
BTC	2.60532	1.60712	3.60351	0.820282	0.432595	2.78165	0.00540827	0.143603
DUSP6	56.6803	42.0444	71.3162	0.748495	0.235988	2.78126	0.00541476	0.143603
ERP27	24.0636	16.8761	31.2511	0.851312	0.360111	2.78119	0.00541603	0.143603
KRT39	0.551692	0.014149	1.08924	1.04271	1.84506	2.77972	0.0054406	0.144106
CCDC85A	3.87812	5.07371	2.68253	-0.72188	0.295696	-2.77831	0.00546421	0.144554
HSPA1A	116.001	91.3399	140.662	0.617427	0.263869	2.77805	0.0054687	0.144554
VTCN1	0.606587	1.02309	0.190087	-0.765491	0.737338	-2.77484	0.00552287	0.145837
GOLGA2P10	2.88641	1.9656	3.80723	0.696882	0.593835	2.77248	0.00556302	0.146747
C12orf43	27.6356	21.2841	33.9871	0.650814	0.243397	2.77212	0.0055692	0.14676
ZNF709	0.818146	1.06405	0.572244	-0.392651	0.847983	-2.77131	0.00558305	0.146975
CYP24A1	1.38491	0.840116	1.9297	0.670956	0.532455	2.77001	0.00560548	0.147415
AC135977.1	0.509899	0.0446045	0.975194	0.919037	1.5156	2.76946	0.00561489	0.147512
PHC2	39.9229	32.9196	46.9262	0.498693	0.252057	2.76812	0.00563815	0.147973
CCDC9	26.3187	18.5539	34.0836	0.843344	0.319091	2.76635	0.00566884	0.148627
HIST1H4L	292.626	393.194	192.058	-1.02987	0.285058	-2.76369	0.00571523	0.149691
APP	244.167	172.772	315.563	0.865303	0.248235	2.76259	0.0057345	0.149858
AC105001.2	0.723699	0.287698	1.1597	0.746037	0.773389	2.76236	0.00573845	0.149858
AC243837.3	3.0214	2.17129	3.87152	0.619301	0.335075	2.76221	0.00574107	0.149858
CDC42EP1	26.0994	21.2233	30.9754	0.524892	0.308368	2.762	0.00574479	0.149858
TNFRSF10A	36.4242	24.6177	48.2307	0.94242	0.240158	2.75904	0.00579712	0.150981
ROBO3	1.8129	0.793778	2.83202	1.09511	0.574716	2.75891	0.00579952	0.150981
JUNB	65.6268	50.5134	80.7402	0.666099	0.288341	2.7574	0.00582623	0.151523
ERG	0.965787	0.390769	1.5408	0.869402	0.636086	2.75442	0.00587956	0.152756
PHLDA2	39.9069	31.1099	48.7039	0.630339	0.288934	2.7532	0.00590157	0.153174
IGFBP4	3.04253	2.05949	4.02557	0.715996	0.391246	2.75266	0.00591141	0.153275
CHST3	12.6822	10.1614	15.2029	0.537735	0.244489	2.75037	0.0059528	0.154194
NNMT	1.34692	0.438476	2.25536	1.17828	0.721128	2.74914	0.00597515	0.154617
ARFGAP1	35.1462	27.376	42.9164	0.630086	0.303538	2.74776	0.00600033	0.155114
ZMAT3	5.77358	7.00953	4.53763	-0.532447	0.319827	-2.74349	0.00607899	0.15699
GJB2	26.4548	21.0357	31.874	0.577108	0.261347	2.74292	0.00608962	0.157107
BTF3L4P2	40.8907	29.9311	51.8503	0.772853	0.390061	2.73861	0.00616997	0.159021
MLLT6	40.5627	32.1944	48.931	0.588996	0.255193	2.73689	0.00620227	0.159694
RGS14	13.1513	9.29427	17.0084	0.806828	0.350211	2.73236	0.0062882	0.161746
SERPINB10	2.51509	1.14588	3.88429	1.18658	0.510568	2.72818	0.00636856	0.16365
ARHGDIA	251.958	204.103	299.812	0.552512	0.26794	2.72754	0.00638076	0.163734
KRBA1	6.79321	5.09631	8.49011	0.638489	0.350459	2.72735	0.00638452	0.163734
AKAP12	4.19848	3.1852	5.21177	0.56971	0.261176	2.72672	0.00639676	0.163885
AC093724.1	1.37202	0.560785	2.18327	1.02824	0.78662	2.72607	0.00640942	0.164047
C1orf122	15.1077	11.4732	18.7422	0.662457	0.344247	2.7253	0.0064244	0.164268
PPM1H	10.0414	11.4489	8.63376	-0.369853	0.242765	-2.72296	0.00647007	0.165272
RRP9	18.2793	13.0396	23.5189	0.804384	0.356984	2.72071	0.00651413	0.166221
RCN2	66.1094	85.5538	46.6649	-0.86067	0.268013	-2.71828	0.00656214	0.167128
S100A16	304.419	240.457	368.382	0.61335	0.2683	2.71752	0.00657728	0.167348
KLK6	3.31837	4.72164	1.9151	-0.972882	0.417459	-2.71344	0.00665882	0.169132
AC008013.1	15.2703	21.9516	8.58896	-1.25915	0.38693	-2.71315	0.00666459	0.169132
SCD	516.202	644.221	388.185	-0.729338	0.233286	-2.71303	0.00666705	0.169132
DOPEY2	11.5321	8.68592	14.3782	0.66693	0.23689	2.71016	0.00672503	0.170436
LENG9	3.97402	2.71712	5.2309	0.745255	0.392224	2.70948	0.00673886	0.170619
KDM6B	15.0093	13.9361	16.0826	0.193715	0.257464	2.70577	0.00681457	0.172367
ALDH6A1	3.16236	3.81029	2.51442	-0.452839	0.322365	-2.70278	0.00687621	0.173755
STK10	43.3599	33.6283	53.0915	0.64345	0.252869	2.70163	0.00690014	0.17419
PATL2	8.58718	5.66242	11.5119	0.909185	0.321317	2.70075	0.00691838	0.17448
CA2	314.466	267.019	361.913	0.437286	0.233726	2.69944	0.00694573	0.174925
PHKA1	15.0932	12.0663	18.1201	0.549245	0.236329	2.69925	0.00694957	0.174925
MPZL3	4.97816	6.3752	3.58112	-0.686983	0.297527	-2.69887	0.00695755	0.174955
SART1	59.365	46.8851	71.845	0.605253	0.317004	2.69748	0.00698655	0.175513
PAIP2B	3.14765	4.0455	2.24981	-0.634642	0.277953	-2.69197	0.0071032	0.17827
FAM49A	11.6429	14.6615	8.62432	-0.702461	0.268677	-2.68988	0.00714783	0.179186
ERMP1	26.7103	33.6029	19.8177	-0.733088	0.232098	-2.68961	0.00715356	0.179186
AP001781.2	0.336946	0.294596	0.379296	0.0914296	1.36491	2.68689	0.00721213	0.180478
STK39	56.0919	47.5292	64.6548	0.436048	0.226885	2.68385	0.00727797	0.181949
ADAMTS12	0.8068	1.09813	0.515475	-0.46933	0.469334	-2.68284	0.00730003	0.18224
ITPRIP	9.41873	6.93313	11.9043	0.701892	0.251632	2.68267	0.0073037	0.18224
MR1	40.5997	31.1997	49.9997	0.663442	0.238691	2.68214	0.00731527	0.182352
LGALS3	221.234	276.063	166.406	-0.726863	0.248482	-2.68149	0.00732943	0.182529
RELB	5.09141	3.40179	6.78103	0.821871	0.369678	2.6792	0.0073798	0.183606
BTN2A1	7.02157	5.7451	8.29804	0.463085	0.278681	2.67791	0.00740826	0.184093
BMS1P22	0.973607	1.65757	0.289643	-1.04314	0.923046	-2.67767	0.0074136	0.184093
NUDT3	8.17656	10.2285	6.1246	-0.656289	0.241153	-2.67674	0.00743418	0.184426
EMP1	371.113	446.666	295.56	-0.5941	0.250403	-2.67547	0.00746239	0.184948
CDCP1	44.6038	36.3593	52.8482	0.527429	0.240061	2.67512	0.00747015	0.184963
C19orf24	27.192	19.9875	34.3965	0.754075	0.369584	2.6741	0.00749295	0.18535
FAM3C2	56.3647	46.3963	66.3332	0.506545	0.266154	2.67322	0.00751266	0.18566
EPPK1	5.44351	3.78795	7.09906	0.758346	0.365237	2.67188	0.00754272	0.186088
RTKN	69.1669	57.7289	80.605	0.474585	0.267514	2.67158	0.00754945	0.186088
MYC	68.3655	54.2137	82.5173	0.597048	0.232044	2.67149	0.0075516	0.186088
STX4	57.2437	44.9731	69.5143	0.617125	0.279762	2.6709	0.00756477	0.186235
ABCF1	8.93678	5.90295	11.9706	0.909961	0.45421	2.66874	0.00761354	0.187257
GALNT7	44.5271	52.9658	36.0885	-0.541073	0.302797	-2.66628	0.00766968	0.188444
SURF2	90.778	72.4339	109.122	0.584586	0.286963	2.66598	0.00767639	0.188444
MTCO3P43	0.933356	0.194573	1.67214	1.1615	1.23161	2.66334	0.00773687	0.189748
C1RL	30.0498	25.9089	34.1908	0.387116	0.258008	2.66219	0.00776349	0.189948
GADD45GIP1	19.2552	14.003	24.5074	0.76566	0.347415	2.66214	0.00776462	0.189948
EGR1	25.8907	20.277	31.5042	0.61133	0.278787	2.66203	0.00776709	0.189948
HIST1H2BH	95.7306	122.998	68.4631	-0.835997	0.273559	-2.66069	0.00779804	0.190524
NMT1	251.772	190.666	312.877	0.711605	0.234938	2.66001	0.00781385	0.19073
TAOK3	65.0805	49.0765	81.0845	0.712974	0.244762	2.65945	0.00782682	0.190867
KAT6B	7.90634	9.89466	5.91803	-0.655188	0.256783	-2.65539	0.00792171	0.192816
CYP27B1	6.9732	4.54017	9.40623	0.909444	0.313588	2.65481	0.00793531	0.192966
RNF24	18.9905	15.3686	22.6124	0.528618	0.231211	2.65386	0.00795776	0.193329
AOAH	2.89935	4.72972	1.06899	-1.46954	0.63777	-2.65135	0.00801696	0.194447
DDAH2	0.181578	0	0.363156	0.446951	2.34875	2.6509	0.00802787	0.194447
BCKDHB	8.13849	11.6021	4.67488	-1.151	0.369093	-2.65068	0.00803289	0.194447
NAMPT	274.875	191.469	358.28	0.900483	0.336949	2.65064	0.0080339	0.194447
DENND5B	5.00833	6.27348	3.74318	-0.616791	0.299077	-2.64912	0.00807011	0.194993
TMEM56	2.89725	3.83268	1.96182	-0.706337	0.386913	-2.64906	0.00807152	0.194993
ADAM22	0.896157	1.25787	0.534442	-0.557251	0.46156	-2.64712	0.00811793	0.195783
AFF1	21.7965	17.118	26.4751	0.600708	0.245668	2.64706	0.00811939	0.195783
CALR	479.266	379.709	578.823	0.606925	0.24969	2.64569	0.00815251	0.19617
PLXDC2	29.9635	35.498	24.4291	-0.52134	0.279016	-2.64545	0.00815825	0.19617
GRINA	28.2397	22.7382	33.7411	0.549438	0.253897	2.64421	0.00818813	0.196523
PSMA6	407.87	341.63	474.109	0.471605	0.230129	2.64421	0.00818814	0.196523
PRSS23	39.6612	50.2176	29.1049	-0.76664	0.248091	-2.64369	0.00820087	0.19661
LAD1	263.792	182.015	345.568	0.921179	0.272016	2.64343	0.00820698	0.19661
CAMK2N1	82.966	104.055	61.8775	-0.740522	0.237913	-2.64238	0.00823263	0.197041
NOCT	9.55232	6.50985	12.5948	0.856199	0.304891	2.63758	0.00834995	0.19948
AC068547.1	5.45481	7.67937	3.23025	-1.03685	0.42608	-2.63698	0.00836475	0.199648
ARHGAP45	9.66104	8.13762	11.1845	0.415152	0.361289	2.63664	0.00837323	0.199666
FITM2	4.5582	5.80878	3.30762	-0.660505	0.270218	-2.63253	0.00847508	0.201909
PPT2	2.08283	3.21075	0.954904	-1.10698	0.603708	-2.63154	0.00849989	0.202313
HLA-H	0.215677	0	0.431354	0.517381	2.17801	2.63122	0.00850787	0.202317
MOSPD1	10.5176	13.1264	7.90891	-0.665068	0.329171	-2.63053	0.00852518	0.202542
C7orf50	98.9128	68.2356	129.59	0.915458	0.327764	2.62895	0.00856481	0.203296
RAB30	7.89681	10.4418	5.35187	-0.849056	0.328717	-2.62688	0.00861708	0.204349
C11orf54	16.1114	19.5838	12.6389	-0.593782	0.26774	-2.62435	0.00868135	0.205684
CDK11A	31.7432	27.3562	36.1302	0.388929	0.289866	2.62324	0.0087099	0.206172
AOC1	1.10895	1.70365	0.514254	-0.836304	0.621251	-2.61986	0.0087965	0.207839
CYB5R3	40.9119	32.495	49.3288	0.587436	0.248651	2.61978	0.00879855	0.207839
ZNF205	9.29947	7.40195	11.197	0.53773	0.36272	2.61955	0.00880448	0.207839
MDK	217.797	184.498	251.097	0.442579	0.250023	2.61887	0.00882215	0.208066
RELN	1.1408	1.84807	0.433524	-0.990419	0.504694	-2.61636	0.0088872	0.209409
ADAM9	2.39402	0.617721	4.17031	1.67629	1.36896	-2.61579	0.00890223	0.209572
BIN1	8.05847	5.8833	10.2337	0.706654	0.351282	2.6147	0.00893066	0.210007
WRB	28.7875	37.0602	20.5149	-0.822947	0.294333	-2.61446	0.00893699	0.210007
KLK5	84.2892	105.507	63.0719	-0.733178	0.234449	-2.61357	0.00896008	0.210238
CABLES1	8.05742	9.00364	7.1112	-0.302537	0.287023	-2.61346	0.0089631	0.210238
SLC38A5	43.2267	33.812	52.6413	0.623757	0.253438	2.61221	0.00899583	0.210814
PFKP	204.859	173.962	235.757	0.436373	0.248113	2.61174	0.00900817	0.210912
NRG4	27.5681	34.7916	20.3447	-0.745743	0.305675	-2.61062	0.00903786	0.211416
ZFYVE28	6.09829	4.84962	7.34696	0.512908	0.33629	2.60497	0.00918834	0.214547
PDIA3	437.184	362.671	511.696	0.495468	0.227414	2.60459	0.0091983	0.214585
LYRM7	17.0794	21.4553	12.7035	-0.712515	0.361398	-2.60342	0.00922981	0.21511
FAM189B	18.3189	14.9265	21.7113	0.511984	0.274335	2.60314	0.00923746	0.21511
CASC10	3.40288	4.43316	2.3726	-0.687929	0.309185	-2.6018	0.00927367	0.215759
PDE5A	17.0161	22.4845	11.5478	-0.904279	0.362356	-2.60125	0.00928854	0.21591
HLA-DOB	1.17644	0.572056	1.78082	0.822855	0.687029	2.5999	0.00932509	0.216557
HLA-V	114.419	73.6136	155.225	1.06611	0.450074	2.5996	0.00933311	0.216557
MTHFD1	193.851	173.596	214.107	0.301026	0.224897	2.59739	0.00939338	0.217479
HOXA1	21.6754	17.237	26.1137	0.57215	0.258176	2.59539	0.0094484	0.218447
SUSD6	21.9843	18.7752	25.1933	0.405505	0.237937	2.59497	0.00945992	0.218517
PYCARD	59.4997	48.2256	70.7738	0.544048	0.29877	2.59449	0.00947306	0.218625
ITPK1	62.8481	47.6557	78.0405	0.699981	0.269097	2.59334	0.00950481	0.21912
CDC37	130.61	102.048	159.173	0.636317	0.281916	2.5931	0.00951145	0.21912
DMPK	9.90188	7.9045	11.8993	0.534681	0.303418	2.59123	0.0095634	0.22012
AD000671.1	1.32348	0.589684	2.05727	0.943504	0.77563	2.5902	0.00959204	0.220583
C2CD4A	0.818406	0.504896	1.13192	0.502486	0.48784	2.58734	0.00967192	0.221963
KLHL21	24.4683	17.6491	31.2874	0.791867	0.270389	2.58728	0.00967376	0.221963
HS3ST1	5.35086	3.8529	6.84882	0.693629	0.276609	2.58713	0.00967786	0.221963
ANKRD36BP2	4.20387	5.74458	2.66315	-0.880647	0.384265	-2.58591	0.00971218	0.222553
LY6E	126.832	96.6374	157.028	0.69467	0.325904	2.58532	0.00972877	0.222735
NUGGC	7.53137	5.48141	9.58132	0.707141	0.351166	2.5848	0.00974368	0.222879
STIMATE	13.4851	10.0742	16.896	0.692439	0.285204	2.58183	0.00982779	0.224604
WDR46	11.01	7.29326	14.7267	0.923205	0.445812	2.58097	0.00985243	0.224968
CDSN	0.0909522	0.181756	0.0001485	-0.240718	2.13652	-2.58031	0.00987111	0.225196
HIST1H2BD	609.556	805.332	413.779	-0.959031	0.264366	-2.5799	0.00988295	0.225267
NKX3-1	3.59067	2.73453	4.44681	0.544485	0.312904	2.57778	0.00994362	0.22625
HSPA6	0.411879	0.164275	0.659483	0.511301	0.819177	2.57608	0.00999261	0.227165
NEDD8-MDP1	2.59342	1.16419	4.02265	1.21463	0.942794	2.57163	0.010122	0.229803
FURIN	52.2251	40.5463	63.904	0.64359	0.256284	2.57148	0.0101265	0.229803
BOP1	32.0436	23.2159	40.8714	0.790011	0.341892	2.57052	0.0101547	0.230242
ANGPT1	0.292785	0.130819	0.454751	0.363405	1.04961	2.56962	0.0101812	0.230639
UBN2	8.42863	10.1435	6.71375	-0.530699	0.294008	-2.56928	0.0101911	0.230663
CCDC86	59.5057	48.1603	70.8512	0.547518	0.250673	2.56816	0.010224	0.231203
AC079594.2	0.0666718	0.133344	0	-0.180585	2.1531	-2.56772	0.0102371	0.231297
DBNDD1	16.0573	12.8003	19.3143	0.557787	0.272342	2.56663	0.0102692	0.231735
LIMCH1	14.5361	18.7941	10.278	-0.811556	0.244871	-2.56645	0.0102744	0.231735
ST3GAL5	3.64173	4.699	2.58446	-0.668951	0.306256	-2.56594	0.0102897	0.231878
TRIM56	25.6279	21.1702	30.0857	0.487629	0.231068	2.56553	0.0103017	0.231945
POLR3D	49.0904	35.0432	63.1375	0.831442	0.24887	2.56394	0.0103492	0.232599
DDR1	25.7475	21.4511	30.0439	0.46752	0.382941	2.56365	0.0103577	0.232599
MAB21L1	0.523162	0.273328	0.772995	0.477585	0.627246	2.56103	0.0104364	0.233994
TUBB2A	10.159	7.7449	12.5732	0.634242	0.31453	2.56097	0.010438	0.233994
MYH9	206.064	178.47	233.657	0.38681	0.277284	2.56037	0.0104562	0.234199
HR	52.446	43.4076	61.4845	0.492689	0.303232	2.55899	0.0104977	0.234752
BARX2	7.64964	10.1514	5.14787	-0.859067	0.334812	-2.55894	0.0104991	0.234752
PPEF2	376.926	291.488	462.363	0.663765	0.306114	2.55771	0.0105365	0.235386
GPANK1	9.60332	7.62369	11.5829	0.54509	0.347463	2.55623	0.0105812	0.236179
CSRP1	164.266	130.274	198.259	0.602069	0.232689	2.55416	0.0106443	0.237178
BX088645.1	1.54216	0.911961	2.17237	0.730505	0.537419	2.5532	0.0106737	0.237453
KRT80	41.1184	50.9314	31.3054	-0.68483	0.237641	-2.55316	0.0106751	0.237453
SAP30BP	110.62	84.8956	136.345	0.677144	0.266616	2.55278	0.0106868	0.23751
ADCY7	41.338	35.132	47.544	0.426017	0.238186	2.55199	0.0107111	0.237845
HDAC9	66.5116	50.9633	82.0599	0.676658	0.296023	2.55123	0.0107345	0.23816
AATF	121.767	101.016	142.517	0.492425	0.260757	2.55002	0.0107717	0.238779
AC005324.4	0.211093	0.361739	0.0604475	-0.360778	1.85288	-2.54836	0.0108229	0.23971
SEMA7A	5.38427	3.87234	6.89621	0.696548	0.316266	2.5474	0.0108528	0.24009
TLR5	3.08857	3.86435	2.31278	-0.554205	0.372698	-2.54721	0.0108587	0.24009
KITLG	39.2818	50.5897	27.9738	-0.832334	0.375789	-2.54669	0.0108751	0.240248
AC015688.5	0.531231	0	1.06246	1.04437	2.21256	2.54616	0.0108917	0.24031
CAND2	0.802705	0.521148	1.08426	0.454376	0.45182	2.546	0.0108965	0.24031
DYNLT1	221.608	190.088	253.129	0.411324	0.229925	2.54467	0.010938	0.241018
CSTB	35.337	44.5968	26.0771	-0.751859	0.256665	-2.54436	0.0109479	0.241031
EMP3	6.58167	4.92161	8.24172	0.642172	0.427989	2.53959	0.0110983	0.244133
NBN	45.9738	35.479	56.4686	0.655706	0.322987	2.53846	0.0111342	0.244715
PGD	251.24	181.599	320.882	0.817851	0.244718	2.53803	0.0111478	0.244806
TSPO	33.2985	25.0424	41.5546	0.70845	0.366541	2.53723	0.0111734	0.24508
DNAJA2	162.487	128.518	196.456	0.608384	0.235882	2.53705	0.0111792	0.24508
RANGAP1	90.8533	69.9134	111.793	0.669548	0.301871	2.53673	0.0111894	0.245095
RIMBP3B	0.23959	0.370056	0.109124	-0.304814	0.657851	-2.53557	0.0112263	0.245694
TJP3	3.27051	5.24449	1.29654	-1.44312	0.479427	-2.53402	0.0112762	0.246578
ENO1	1534.44	1267.56	1801.33	0.506671	0.238834	2.5331	0.011306	0.246974
RBM17	252.548	208.196	296.9	0.509969	0.227013	2.53286	0.0113135	0.246974
ARPC5L	119.69	101.697	137.683	0.433393	0.23553	2.53243	0.0113276	0.247055
GRIP1	86.9645	92.4381	81.491	-0.179773	0.237842	-2.53195	0.011343	0.247055
PMS2P11	0.625532	1.25106	0	-1.17061	2.17427	-2.53186	0.0113459	0.247055
HMGN3	51.4717	43.0436	59.8997	0.467504	0.254057	2.53061	0.0113864	0.247729
PDIA3P1	5.63252	4.24559	7.01945	0.612398	0.338334	2.52907	0.0114366	0.248612
GLDC	1.67905	1.41391	1.9442	0.286504	0.500591	2.52599	0.0115371	0.250375
MIIP	8.85444	6.26643	11.4424	0.775951	0.382595	2.52526	0.0115612	0.250687
ALPK3	1.10234	1.73714	0.467525	-0.899287	0.377592	-2.52407	0.0116004	0.251325
MT1X	198.411	258.238	138.585	-0.893131	0.248601	-2.52231	0.0116588	0.25238
DAXX	7.55205	5.13424	9.96986	0.83859	0.60971	2.52194	0.0116709	0.252429
ARHGAP17	72.2654	60.3002	84.2307	0.475483	0.234076	2.52046	0.01172	0.253279
MEIS2	92.2211	60.9378	123.504	1.00731	0.417235	2.51886	0.0117735	0.254222
HRASLS2	1.23577	0.369737	2.1018	1.17921	1.07485	2.51735	0.011824	0.2551
MYBBP1A	56.2966	36.0025	76.5908	1.06826	0.298258	2.51526	0.0118944	0.256404
CCNG2	9.99595	12.1578	7.83409	-0.574765	0.28653	-2.51425	0.0119285	0.256592
ZBTB22	0.0817387	0.163477	0	-0.218443	2.16377	-2.51412	0.0119329	0.256592
GOLGA6L10	0.0499885	0.099977	0	-0.137473	2.16377	-2.51412	0.0119329	0.256592
SEMA3F	12.2373	10.4345	14.0401	0.395412	0.304658	2.51315	0.0119658	0.257086
MAX	122.909	91.3315	154.487	0.751898	0.22791	2.51154	0.0120205	0.258045
SLC26A2	9.07511	11.6122	6.53797	-0.742578	0.292919	-2.51066	0.0120507	0.25848
TEP1	19.9958	13.9228	26.0688	0.859115	0.269178	2.50779	0.012149	0.260372
PPP2R5B	5.64138	3.94966	7.3331	0.751522	0.375979	2.50616	0.012205	0.261201
CNP	70.1469	57.6469	82.647	0.512259	0.255417	2.50608	0.0122079	0.261201
TFEC	0.472054	0.180681	0.763428	0.578763	0.732151	2.50339	0.0123008	0.262971
FTSJ3	60.7635	47.5609	73.966	0.626441	0.274236	2.50297	0.0123156	0.263069
PAK1	53.4645	42.3914	64.5375	0.594913	0.233136	2.5022	0.0123425	0.263426
OLFM4	0.3178	0.527138	0.108463	-0.46227	0.864712	-2.5007	0.0123948	0.264249
AP003419.1	0.339418	0	0.678836	0.747461	2.25049	2.50051	0.0124016	0.264249
AC270306.4	73.3442	55.513	91.1754	0.705798	0.330473	2.49987	0.012424	0.26451
HIST1H3E	10.7061	11.2799	10.1323	-0.141546	0.303935	-2.49778	0.0124975	0.265809
ATP10D	19.3431	15.0863	23.5998	0.612807	0.253174	2.49723	0.0125168	0.265809
DCTN1	68.344	55.2039	81.4841	0.553446	0.295692	2.49709	0.0125216	0.265809
TSPAN17	29.3274	24.4004	34.2544	0.472949	0.249273	2.49694	0.0125269	0.265809
NFE2L1	218.442	169.378	267.507	0.656221	0.253712	2.49667	0.0125365	0.265809
KDSR	139.416	106.062	172.769	0.698722	0.237188	2.49547	0.0125791	0.266046
MAFB	0.481032	0.241769	0.720294	0.470257	0.67631	2.49545	0.0125799	0.266046
EHBP1L1	45.7711	34.4555	57.0868	0.7122	0.266261	2.49525	0.012587	0.266046
NOC2L	96.3167	73.3344	119.299	0.694524	0.294226	2.49519	0.0125889	0.266046
ACTN1	154.34	124.323	184.357	0.564646	0.233393	2.49339	0.0126529	0.267181
SCRN1	105.187	83.2489	127.126	0.604827	0.232628	2.48982	0.0127806	0.269656
SEC61A2	11.4547	14.3958	8.51351	-0.694493	0.308557	-2.48748	0.0128652	0.271219
LOXL2	7.70687	10.1706	5.24318	-0.839349	0.301006	-2.48693	0.012885	0.271415
DHX37	20.3644	16.0513	24.6775	0.590619	0.270397	2.48594	0.012921	0.271774
PBX2	2.58565	3.42806	1.74324	-0.690794	0.350256	-2.48562	0.0129325	0.271774
PTDSS2	7.25662	8.24612	6.26712	-0.347464	0.427688	2.48559	0.0129336	0.271774
CAT	41.68	52.0508	31.3092	-0.715426	0.238599	-2.4825	0.0130463	0.273917
SLC25A29	4.62087	6.00624	3.23551	-0.726102	0.342332	-2.48209	0.0130613	0.273917
EPHB4	31.9569	26.7407	37.1731	0.46055	0.287201	2.48193	0.0130674	0.273917
CCDC150P1	2.28676	1.61637	2.95716	0.596899	0.396991	2.48064	0.0131148	0.274577
AC020915.5	1.60954	1.15837	2.06071	0.503918	0.450639	2.48049	0.0131202	0.274577
SALL4	2.8637	3.60236	2.12505	-0.558497	0.36592	-2.47621	0.0132787	0.27767
KLF10	34.3481	28.8246	39.8715	0.454592	0.232415	2.47586	0.0132915	0.277713
TTC3	44.3483	52.6962	36.0003	-0.53728	0.288001	-2.47414	0.0133558	0.278832
FAM20C	22.9846	18.0209	27.9483	0.605889	0.274122	2.47365	0.0133742	0.278834
NOS1AP	10.5911	9.28578	11.8964	0.326317	0.280465	2.47329	0.0133875	0.278834
NUBP1	61.5756	53.0973	70.0539	0.393359	0.237643	2.47327	0.0133884	0.278834
EPHA1	58.5545	50.5587	66.5503	0.389745	0.276706	2.47264	0.013412	0.2791
SEC16B	1.13828	0.978889	1.29767	0.215477	0.535877	2.47219	0.0134286	0.279223
TCOF1	115.498	91.9522	139.043	0.591315	0.263918	2.471	0.0134736	0.279931
ELOF1	47.9676	38.1479	57.7873	0.586568	0.310559	2.47011	0.0135071	0.280402
CDA	48.3297	61.1315	35.5277	-0.766333	0.252445	-2.46878	0.0135574	0.281221
AP000275.2	7.57614	5.54682	9.60545	0.69594	0.390538	2.46643	0.0136468	0.2828
ANXA9	5.59992	7.37627	3.82356	-0.79621	0.347368	-2.4662	0.0136555	0.2828
BEX2	5.55406	3.85941	7.24871	0.763387	0.437874	2.46482	0.0137082	0.283541
TMEM239	0.310621	0.152505	0.468737	0.349803	0.699474	2.46464	0.0137153	0.283541
CYP1A1	3.38194	4.49748	2.2664	-0.751071	0.371721	-2.4644	0.0137242	0.283541
PNPLA3	5.53579	7.34734	3.72423	-0.821238	0.37811	-2.46371	0.0137506	0.283584
DUS3L	26.9117	20.5866	33.2368	0.665412	0.324537	2.4636	0.0137551	0.283584
KRT87P	7.08531	9.349	4.82162	-0.829998	0.332099	-2.46349	0.0137592	0.283584
PLEC	66.0195	53.4524	78.5866	0.547528	0.312356	2.46311	0.0137738	0.283659
A2ML1	1.49399	2.1368	0.851181	-0.76085	0.49858	-2.46235	0.0138031	0.284035
SLC7A6OS	27.0059	25.2798	28.732	0.178062	0.24817	2.46173	0.0138267	0.284295
RBMXL1	11.6435	8.62486	14.6621	0.702441	0.253887	2.46036	0.0138798	0.28516
FAM111A	70.1373	54.0178	86.2568	0.665369	0.26659	2.45908	0.0139295	0.285954
HSPA2	16.9061	20.8462	12.9659	-0.645474	0.241711	-2.45773	0.013982	0.286803
MROH6	20.7128	19.7545	21.6711	0.127427	0.337442	2.45726	0.0140001	0.286947
KRT4	58.2315	78.7145	37.7484	-1.0407	0.330368	-2.45674	0.0140203	0.287132
DEXI	14.6313	17.3474	11.9152	-0.506505	0.272455	2.45518	0.0140814	0.287928
SCPEP1	77.1452	64.4002	89.8902	0.47483	0.229327	2.45477	0.0140976	0.288031
PPP1R26	40.9735	34.0785	47.8684	0.478313	0.273286	2.45255	0.0141847	0.289581
BRD2	34.0791	30.181	37.9772	0.321959	0.24664	2.4497	0.0142975	0.291654
AL353754.1	1.39005	2.7801	0	-1.91842	2.19165	-2.44843	0.0143481	0.291831
NMRAL2P	58.1846	53.6436	62.7257	0.221822	0.253205	2.44835	0.0143514	0.291831
SDC2	0.0802777	0.160555	0	-0.214816	2.19291	-2.44834	0.0143514	0.291831
AC243807.2	0.408791	0.810789	0.006794	-0.84685	2.19291	-2.44834	0.0143514	0.291831
HRAS	104.917	83.44	126.394	0.593293	0.299806	2.4473	0.0143932	0.29245
GAS1	0.5168	0.270632	0.762968	0.472459	0.653205	2.44685	0.0144112	0.292511
FAM86MP	1.38976	0.645969	2.13356	0.928865	0.777856	2.44664	0.0144195	0.292511
RPS2P7	0.553949	0.0958755	1.01202	0.876563	1.46796	2.44637	0.0144302	0.292511
ELL2	62.5211	81.6285	43.4138	-0.895631	0.285183	-2.44509	0.0144815	0.293322
ATP11A	33.7832	40.5067	27.0597	-0.564845	0.229741	-2.44323	0.0145563	0.294606
SLC7A5P2	5.74698	3.41602	8.07794	1.03962	0.609861	2.44258	0.0145828	0.29491
SPRR2A	1.74282	2.91345	0.572188	-1.31567	0.87148	-2.44166	0.0146201	0.295434
PUS10	6.94334	8.86003	5.02665	-0.710234	0.381323	-2.44122	0.0146378	0.295561
SNRPGP4	15.3136	25.4167	5.21056	-2.08866	0.873837	-2.43891	0.0147318	0.297226
KIZ	11.714	15.3261	8.10198	-0.842928	0.310654	-2.43598	0.0148515	0.299402
SSX3	0.226716	0.453432	0	-0.539464	2.20072	-2.4357	0.0148629	0.299402
CDH1	249.661	200.976	298.345	0.567625	0.220033	2.43531	0.0148791	0.299496
SLC27A3	28.6866	24.8543	32.5189	0.374571	0.289892	2.43453	0.0149112	0.299908
TSPAN15	87.0547	71.7575	102.352	0.506399	0.238117	2.4336	0.0149497	0.300301
FAM110A	12.1404	9.32709	14.9537	0.627462	0.340165	2.43349	0.014954	0.300301
UTP14A	62.3508	51.722	72.9796	0.488722	0.238807	2.43245	0.0149969	0.300566
AC027796.3	0.422764	0.223583	0.621945	0.406612	0.644781	2.43228	0.0150039	0.300566
NME1-NME2	24.446	4.04373	44.8482	3.1843	1.48552	2.43201	0.0150155	0.300566
TOR4A	10.8318	8.33505	13.3285	0.618162	0.317025	2.43167	0.0150296	0.300566
PLAT	3.14718	2.03035	4.26401	0.796676	0.374718	2.43156	0.0150338	0.300566
SLC52A2	22.4216	16.51	28.3332	0.744354	0.341698	2.43066	0.0150712	0.301016
E2F4	72.7064	59.3927	86.02	0.526974	0.266677	2.42836	0.0151672	0.302528
ZNF593	49.3676	38.1525	60.5826	0.653417	0.361719	2.42829	0.0151703	0.302528
ADAP1	79.3321	58.8102	99.8542	0.753808	0.34533	2.42799	0.015183	0.302546
FLRT3	1.30622	1.54388	1.06855	-0.298408	0.460441	-2.42734	0.0152102	0.302684
TICAM1	10.0286	8.03589	12.0213	0.527129	0.291499	2.42726	0.0152133	0.302684
AP5Z1	12.8848	10.0516	15.718	0.597144	0.310636	2.42655	0.0152433	0.303047
AP3D1	68.4143	57.8653	78.9634	0.44192	0.268688	2.42504	0.0153067	0.303849
AC073610.3	0.228537	0	0.457074	0.543074	2.28354	2.42475	0.0153189	0.303849
CU633906.4	0.194353	0	0.388707	0.473742	2.28354	2.42475	0.0153189	0.303849
PDGFD	1.08993	1.53228	0.647585	-0.620084	0.46893	-2.42445	0.0153317	0.303869
NAMPTP1	7.88314	5.3204	10.4459	0.856739	0.448615	2.42415	0.0153444	0.303887
CLDN23	2.66226	1.92881	3.39571	0.585782	0.384962	2.42198	0.0154362	0.305472
LURAP1L	7.03857	9.36916	4.70797	-0.861249	0.331902	-2.42005	0.0155185	0.306724
VAMP8	213.349	186.054	240.644	0.369431	0.228175	2.41994	0.0155233	0.306724
CST3	172.145	141.327	202.964	0.519097	0.243858	2.4196	0.0155375	0.30677
DAPK3	25.5619	20.4403	30.6835	0.563404	0.29974	2.41885	0.0155697	0.307172
INTS1	28.0826	23.969	32.1962	0.410882	0.298335	2.41808	0.0156027	0.307574
FAM83A	4932.04	6947.81	2916.28	-1.25214	0.364513	-2.41782	0.0156139	0.307574
HCG4P11	0.344	0.039141	0.64886	0.666077	1.94209	2.41735	0.015634	0.307734
HSPD1P11	10.1991	13.2564	7.14171	-0.808211	0.316433	-2.41631	0.0156787	0.30838
MTMR11	12.2035	9.75249	14.6545	0.541907	0.265769	2.41195	0.0158674	0.311721
PMP2	0.0898132	0.172382	0.0072445	-0.219029	1.88521	-2.41179	0.0158745	0.311721
TMEM19	35.3841	37.4098	33.3583	-0.160816	0.243045	-2.41093	0.0159118	0.311721
HLA-DQB2	0.088539	0	0.177078	0.23521	2.26921	2.41093	0.0159121	0.311721
HIST1H2AB	202.812	267.675	137.949	-0.951307	0.295251	-2.41072	0.015921	0.311721
IL16	5.30957	3.80593	6.81321	0.701098	0.386126	2.41023	0.0159426	0.311774
RAB27A	36.6225	26.5383	46.7066	0.792749	0.276049	2.41011	0.0159479	0.311774
MRPL9	170.501	129.688	211.315	0.700085	0.233745	2.4091	0.0159919	0.312399
TLR6	0.976492	1.48573	0.467253	-0.760551	0.454998	-2.40791	0.0160441	0.313182
SRP9P1	13.4138	0	26.8275	4.79844	3.51218	2.40753	0.0160609	0.313272
CORO7	18.7356	14.9552	22.516	0.559613	0.351187	2.40717	0.0160766	0.313342
KLF13	4.36498	3.39041	5.33954	0.530021	0.312304	2.40471	0.0161851	0.315219
TET1	0.328502	0.471178	0.185826	-0.31108	0.518914	-2.40338	0.0162441	0.31613
RAB3IL1	7.90376	5.76682	10.0407	0.706283	0.337161	2.40178	0.0163155	0.317104
EYA1	0.974918	1.27774	0.672102	-0.445937	0.52693	-2.40171	0.0163187	0.317104
MAP3K14	22.6106	18.0968	27.1245	0.558497	0.27128	2.40101	0.0163499	0.317471
MBOAT7	0.0961967	4e-06	0.192389	0.25385	2.46155	2.39881	0.0164485	0.319146
GRIP2	0.346077	0.13714	0.555014	0.451518	0.674554	2.39747	0.0165087	0.320073
UBC	871.161	725.532	1016.79	0.486343	0.244915	2.3969	0.0165346	0.320335
NFKB2	34.7231	31.265	38.1812	0.280191	0.261041	2.39603	0.0165739	0.320734
HIST1H3J	175.982	227.131	124.833	-0.858352	0.251644	-2.39583	0.0165826	0.320734
RBP5	18.6299	13.8627	23.3971	0.715021	0.362381	2.39562	0.0165925	0.320734
GPRIN1	9.29841	7.18743	11.4094	0.59995	0.31737	2.39534	0.0166049	0.320734
PES1	63.0171	53.3267	72.7074	0.440147	0.291779	2.39325	0.0166999	0.322328
MT1F	15.9597	22.706	9.21346	-1.21478	0.360353	-2.3924	0.0167386	0.322834
CCDC134	7.87553	5.85983	9.89123	0.666922	0.34452	2.39089	0.0168075	0.323737
RHOBTB3	321.978	386.803	257.154	-0.587095	0.24905	-2.39083	0.0168105	0.323737
LENG1	0.383195	0.75716	0.0092295	-0.799991	2.43001	-2.39012	0.0168427	0.323888
UBE2S	135.616	90.2802	180.951	0.995175	0.309791	2.39011	0.0168434	0.323888
IL4R	71.6422	61.7605	81.5238	0.394953	0.257262	2.38832	0.0169254	0.325222
SLC44A3	8.35019	6.17703	10.5234	0.683101	0.305097	2.38764	0.016957	0.325587
EIF2AK2	114.277	83.1831	145.371	0.798031	0.278321	2.38601	0.0170324	0.326793
CAPN3	2.54103	1.90275	3.1793	0.52584	0.451642	2.38381	0.0171346	0.328509
CBR1	79.531	64.5365	94.5255	0.543588	0.284085	2.3828	0.0171817	0.329167
PPP1R12C	35.6741	29.167	42.1811	0.517426	0.33158	2.3824	0.0172003	0.329278
TPD52L1	86.5384	103.975	69.1019	-0.58252	0.234827	-2.38167	0.0172343	0.329686
ABCA5	16.1329	20.0318	12.234	-0.668329	0.33746	-2.38103	0.0172644	0.330017
CDC42EP4	24.0018	19.8854	28.1181	0.479416	0.244568	2.37983	0.0173205	0.330779
UHRF1	85.3228	70.3127	100.333	0.506873	0.238598	2.37963	0.0173299	0.330779
RAP1GAP2	13.83	11.6009	16.0591	0.437019	0.25118	2.37895	0.0173619	0.331145
BCL7B	45.8221	36.9868	54.6574	0.551072	0.256974	2.37644	0.0174808	0.332986
PPFIBP2	10.8591	15.046	6.67221	-1.0645	0.359216	-2.37636	0.0174842	0.332986
BMP7	12.2717	14.2165	10.3268	-0.425907	0.297268	-2.37352	0.0176192	0.335311
MED16	10.3372	7.61343	13.0611	0.707045	0.313274	2.37324	0.0176328	0.335322
RPL39P3	7.36135	0	14.7227	3.97478	2.48164	2.37075	0.0177518	0.337337
SLCO1B3	1.85061	1.04638	2.65484	0.836733	0.524154	2.3697	0.0178024	0.337926
SLC12A2	33.9633	41.4685	26.4581	-0.629164	0.297461	-2.36957	0.017809	0.337926
CHN2	3.40329	4.85813	1.94846	-0.990475	0.523498	-2.36824	0.0178729	0.338806
MARCH3	3.69896	5.3237	2.07423	-1.04054	0.428604	-2.36806	0.0178816	0.338806
CLIP1	99.1054	83.7388	114.472	0.446448	0.243524	2.36658	0.0179532	0.339913
AL645933.1	6.1813	3.98474	8.37786	0.911743	0.5394	2.36088	0.0182315	0.34493
CHAC1	1.3506	0.630799	2.07041	0.91285	0.761859	2.36019	0.0182656	0.345192
CD3EAP	34.0622	25.1803	42.9442	0.747191	0.273599	2.3598	0.0182846	0.345192
MMAA	4.58893	2.46059	6.71727	1.15707	0.332371	2.35965	0.0182924	0.345192
ZPR1	81.686	51.963	111.409	1.0857	0.235291	2.35951	0.0182989	0.345192
MBNL2	40.5201	51.7968	29.2433	-0.803833	0.362055	-2.35885	0.0183317	0.345559
FBL	192.171	142.834	241.507	0.753625	0.315768	2.35838	0.0183548	0.345742
NID2	2.88964	3.80992	1.96937	-0.695855	0.384816	-2.35755	0.0183962	0.34627
NCL	1345.16	1160.63	1529.68	0.398021	0.234419	2.35677	0.0184348	0.346744
CXCL8	8.24001	10.6381	5.84191	-0.766385	0.317766	-2.35599	0.0184736	0.34722
CEP85L	3.48124	4.52184	2.44065	-0.682467	0.339499	-2.35539	0.0185034	0.347528
AC026464.4	35.324	28.3361	42.3119	0.562084	0.302343	2.35473	0.0185361	0.347579
ARHGEF3	29.8969	34.7584	25.0355	-0.457803	0.23181	-2.35455	0.0185451	0.347579
GNA11	41.7452	34.0389	49.4515	0.525936	0.247299	2.35451	0.0185472	0.347579
VAV2	50.1136	43.8687	56.3584	0.354297	0.253282	2.35409	0.0185683	0.347579
AC087632.1	105.228	83.5391	126.917	0.597517	0.279122	2.35398	0.0185735	0.347579
SLC37A1	14.7645	12.6003	16.9287	0.398634	0.279016	2.35367	0.0185893	0.347623
ZNF622	52.0035	42.0838	61.9233	0.546448	0.287474	2.35306	0.0186196	0.347939
MAP1S	11.6951	10.1904	13.1997	0.343603	0.317848	2.35263	0.018641	0.348087
PHRF1	24.1022	19.7512	28.4531	0.505225	0.288937	2.34859	0.0188447	0.351636
WNT2B	3.60276	4.07311	3.1324	-0.29589	0.270466	-2.34731	0.0189097	0.35226
CHN1	8.10617	5.74653	10.4658	0.765121	0.33089	2.3472	0.0189149	0.35226
OLFML2A	22.4933	27.0011	17.9855	-0.560592	0.233335	-2.34712	0.0189191	0.35226
FP565260.1	18.3965	14.8145	21.9785	0.539037	0.291958	2.34676	0.0189373	0.352346
MAF	0.592454	0.811562	0.373346	-0.399539	0.458607	-2.34595	0.0189784	0.352735
EIF3M	661.99	529.408	794.572	0.584891	0.22514	2.34581	0.0189855	0.352735
AC010547.4	0.455713	0.250899	0.660528	0.408677	0.638992	2.34392	0.0190822	0.354275
CD99	62.2764	51.1282	73.4247	0.513717	0.268068	2.34199	0.0191812	0.355856
CDC26	110.623	95.5566	125.689	0.391839	0.241298	2.34159	0.0192015	0.355856
HLA-DPB2	0.209765	0	0.419531	0.505414	2.49028	2.34146	0.0192086	0.355856
KMT2B	7.60027	6.95334	8.24722	0.217459	0.289936	2.34094	0.0192351	0.355932
ERICH1	38.1399	33.8712	42.4087	0.315949	0.249489	2.34084	0.0192403	0.355932
RUBCN	34.4181	29.048	39.7881	0.440879	0.237066	2.34031	0.0192677	0.356184
REL	18.7318	23.0644	14.3992	-0.64405	0.320848	-2.33988	0.0192898	0.356337
MFHAS1	23.7166	16.6567	30.7766	0.847747	0.238941	2.33882	0.0193449	0.356785
EIF3D	210.851	177.249	244.453	0.46156	0.268147	2.33835	0.019369	0.356785
TMSB4XP6	150.034	21.202	278.866	3.65597	1.67509	2.3381	0.0193818	0.356785
HACD2	91.223	116.207	66.2386	-0.801704	0.303068	-2.33808	0.0193831	0.356785
PIEZO1	64.9163	49.6467	80.186	0.680762	0.264424	2.33762	0.0194067	0.356889
EPHA4	4.7332	5.75734	3.70906	-0.521019	0.342799	-2.33744	0.0194164	0.356889
GTF2E2	63.2007	50.313	76.0885	0.587194	0.236842	2.33602	0.0194902	0.357787
SPTLC3	59.2853	47.5848	70.9858	0.567207	0.253913	2.33597	0.019493	0.357787
PKP3	106.6	78.5351	134.665	0.77039	0.326011	2.33514	0.019536	0.358322
TMEM168	11.5584	12.985	10.1317	-0.329218	0.337774	-2.33387	0.0196026	0.359066
HEY1	5.36196	6.8956	3.82831	-0.709532	0.313901	-2.33383	0.0196044	0.359066
C6orf62	78.4761	61.852	95.1002	0.612581	0.231407	2.33353	0.0196203	0.359103
SLC16A4	3.26651	4.40328	2.12974	-0.787793	0.39825	-2.33112	0.0197468	0.361163
CDON	1.84841	2.56944	1.12736	-0.746632	0.4078	-2.33051	0.0197794	0.361502
OAF	19.3277	17.2907	21.3647	0.29011	0.256118	2.32818	0.0199025	0.363496
ATAD3B	44.2959	30.6603	57.9314	0.896362	0.299692	2.32712	0.0199588	0.364266
HOXC11	8.36994	10.2351	6.50483	-0.582117	0.276129	-2.32354	0.0201502	0.3675
HMOX2	169.81	135.273	204.349	0.59158	0.273327	2.32209	0.0202278	0.368522
ZNF706	94.1363	123.819	64.4541	-0.931276	0.292262	-2.32197	0.0202348	0.368522
MAT1A	0.194845	0	0.38969	0.474763	2.31347	2.32105	0.0202839	0.368631
PLA2G4A	22.9259	18.356	27.4957	0.557963	0.293349	2.32098	0.0202877	0.368631
C15orf39	8.6128	6.75997	10.4656	0.563194	0.315043	2.32089	0.0202928	0.368631
MYOT	2.96299	4.65416	1.27182	-1.31547	0.687527	-2.3208	0.0202979	0.368631
ATP6V1B1	1.83002	2.75305	0.906994	-0.976761	0.584004	-2.31993	0.0203447	0.369221
TPRG1	3.69879	4.98743	2.41015	-0.812102	0.503346	-2.31948	0.0203691	0.369404
PABPC4L	1.26982	0.919282	1.62037	0.449201	0.395318	2.31875	0.0204085	0.369859
MTND3P10	1.81301	0.307163	3.31885	1.72421	1.59896	2.31431	0.0206506	0.373984
TMEM99	10.0455	12.3674	7.72358	-0.615726	0.362444	-2.31275	0.0207364	0.37486
PLA2G7	2.10297	2.96225	1.24368	-0.820458	0.459942	-2.31271	0.0207388	0.37486
N4BP2L1	1.89791	1.11659	2.67924	0.797669	0.531364	2.31222	0.0207658	0.37486
CTDP1	20.7296	17.1423	24.3169	0.480743	0.285501	2.31217	0.0207684	0.37486
ARHGEF35	19.9645	16.7642	23.1648	0.443934	0.248461	2.31206	0.0207746	0.37486
AC113191.1	38.7154	53.454	23.9768	-1.12445	0.399248	-2.31185	0.020786	0.37486
DLX6	3.29655	4.10618	2.48692	-0.550293	0.371809	-2.31133	0.0208145	0.375112
AC215219.1	6.33284	4.80407	7.8616	0.610502	0.360799	2.31075	0.0208466	0.375428
HNRNPF	380.075	324.145	436.005	0.426568	0.22303	2.30905	0.0209406	0.376858
CARD19	33.2986	27.4411	39.1561	0.497646	0.295773	2.30805	0.0209964	0.377599
TCF19	11.28	7.24486	15.3152	0.984647	0.464903	2.30726	0.0210402	0.378123
RRBP1	122.424	97.8021	147.046	0.583431	0.266748	2.30593	0.0211146	0.379197
SLC2A3	3.03919	2.48901	3.58937	0.39548	0.380015	2.30555	0.0211358	0.379313
SPATA46	5.04066	3.83907	6.24226	0.581709	0.448933	2.304	0.0212225	0.38053
PWWP2B	10.8785	8.41056	13.3464	0.608334	0.322272	2.30355	0.0212478	0.38053
SF3B2	238.423	199.475	277.37	0.473588	0.276929	2.30169	0.0213526	0.382142
VARS2	2.27016	1.62302	2.91731	0.578634	0.411375	2.30063	0.0214126	0.382894
SH2D5	3.42765	2.21259	4.64271	0.812648	0.3852	2.30039	0.0214262	0.382894
ANTXR2	13.3674	9.25706	17.4778	0.849176	0.28152	2.29986	0.0214561	0.382894
NMU	216.204	270.014	162.395	-0.730001	0.236321	-2.29986	0.0214563	0.382894
DENND2D	30.6717	27.4983	33.845	0.290073	0.248155	2.29964	0.0214687	0.382894
DTNBP1	13.3441	11.064	15.6242	0.462583	0.286099	2.29937	0.0214841	0.382904
NHEJ1	15.4733	13.0615	17.8852	0.425515	0.264566	2.29758	0.0215858	0.384451
TP53I11	7.33996	9.91266	4.76727	-0.920044	0.35499	-2.29712	0.0216117	0.384646
NLRP2	5.23255	7.29946	3.16562	-0.994485	0.478465	-2.29681	0.0216296	0.384701
RRP7A	34.5219	26.3499	42.6938	0.67589	0.289177	2.2965	0.0216471	0.384746
RPUSD1	23.6396	18.4296	28.8497	0.619454	0.308472	2.29414	0.0217826	0.386589
SHANK2	8.45306	7.69015	9.21597	0.233373	0.273574	2.29411	0.0217842	0.386589
GNB4	3.23745	3.42014	3.05477	-0.124472	0.353314	2.29387	0.021798	0.386589
PPAN	43.4068	35.26	51.5535	0.535406	0.290783	2.29365	0.0218106	0.386589
CCDC85B	13.5584	10.2988	16.8178	0.657147	0.363761	2.29241	0.021882	0.387424
MSC	1.21285	0.470747	1.95495	1.00659	0.791221	2.29231	0.0218878	0.387424
TNIP1	71.2482	58.5239	83.9725	0.513526	0.270711	2.29132	0.0219449	0.388168
SYNJ2	25.1663	21.1122	29.2204	0.450677	0.22962	2.28951	0.0220499	0.389495
B4GALNT3	5.67852	4.50037	6.85668	0.51439	0.365555	2.28944	0.0220537	0.389495
PPARA	8.89092	12.0164	5.76549	-0.944058	0.266627	-2.28913	0.0220717	0.389495
DYNC2H1	5.09178	6.77595	3.40762	-0.819018	0.327717	-2.28899	0.0220802	0.389495
TRAF2	48.7711	38.9258	58.6165	0.578387	0.305635	2.28861	0.0221019	0.38958
Z84488.2	0.737928	0.146986	1.32887	1.02178	1.42675	2.28838	0.0221152	0.38958
MAD1L1	41.5984	32.1544	51.0425	0.650489	0.333914	2.28726	0.0221804	0.390464
MILR1	5.34871	7.40396	3.29346	-0.968927	0.449282	-2.28616	0.0222447	0.391328
UPK2	3.97606	5.64856	2.30356	-1.00902	0.486548	-2.28162	0.0225116	0.395346
CYP4F12	11.7502	15.0625	8.43794	-0.767156	0.343244	-2.2815	0.022519	0.395346
CARS	55.6178	47.4051	63.8306	0.421513	0.246622	2.2809	0.0225542	0.395597
SERPINH1	117.083	100.872	133.293	0.398624	0.229922	2.28074	0.022564	0.395597
CYFIP1	3.40112	2.98388	3.81836	0.274368	0.593929	2.28014	0.0225992	0.395947
FLNA	293.543	208.499	378.586	0.857483	0.262354	2.27916	0.0226576	0.396549
EIF4G1	358.985	295.401	422.57	0.515053	0.240566	2.27871	0.0226842	0.396549
BDH1	7.1191	9.18242	5.05579	-0.749694	0.349512	-2.27855	0.0226937	0.396549
PKM	1800.57	1399.38	2201.76	0.653499	0.261492	2.2782	0.0227148	0.396549
ATP5MF-PTCD1	9.56926	8.64121	10.4973	0.254009	0.430082	2.27788	0.0227337	0.396549
AC060766.1	13.3878	10.4186	16.357	0.604121	0.375976	2.27708	0.0227813	0.396549
ARPC4-TTLL3	3.60853	2.23358	4.98348	0.887855	0.669971	2.27708	0.0227814	0.396549
GPD2	137.01	98.7695	175.25	0.820948	0.238226	2.27684	0.0227959	0.396549
HSPA8	3263.95	2550.02	3977.89	0.64129	0.236628	2.27677	0.0228001	0.396549
PAPD5	18.4625	14.4491	22.476	0.603661	0.293147	2.27673	0.0228025	0.396549
NELFE	29.9024	22.1261	37.6786	0.74201	0.344115	2.2754	0.022882	0.397472
HPCAL1	18.1622	15.0536	21.2706	0.472242	0.275428	2.27492	0.022911	0.397472
FAM168B	48.1031	57.7724	38.4338	-0.575703	0.23376	-2.27456	0.0229322	0.397472
HK2	22.4052	19.4067	25.4037	0.371697	0.248026	2.2744	0.0229422	0.397472
PDZD8	33.8905	38.2589	29.5222	-0.363161	0.287493	-2.2743	0.022948	0.397472
SFT2D3	0.122714	0.232527	0.0129	-0.283128	1.79149	-2.27152	0.0231157	0.400109
KCTD5	51.6085	43.1921	60.0249	0.465611	0.243456	2.27069	0.0231656	0.400475
GDI1	47.4902	41.6833	53.2972	0.347206	0.250662	2.27048	0.0231787	0.400475
DDX11L9	0.415448	0.153986	0.676909	0.539178	1.04522	2.27016	0.0231977	0.400475
RIC8A	58.5234	47.5438	69.503	0.538399	0.256393	2.26983	0.0232179	0.400475
GPAT3	13.3448	16.4638	10.2259	-0.637532	0.262799	-2.26953	0.023236	0.400475
GADD45G	2.28516	1.34889	3.22143	0.84575	0.635981	2.26939	0.0232446	0.400475
SORL1	48.4902	52.8634	44.117	-0.255636	0.22162	-2.26938	0.0232454	0.400475
AK2	348.668	285.695	411.64	0.525371	0.228086	2.26761	0.0233528	0.402058
SLC16A14	0.916408	1.2343	0.598519	-0.483085	0.522915	-2.26706	0.0233867	0.402373
THEM4	12.0972	15.2891	8.90536	-0.717626	0.29593	-2.26567	0.0234715	0.403403
NEURL3	1.53175	0.968039	2.09545	0.653393	0.579005	2.26557	0.0234778	0.403403
FAM214A	14.8699	19.5272	10.2127	-0.872403	0.319719	-2.2651	0.0235066	0.403414
GABRA3	2.89528	3.78136	2.00921	-0.668035	0.350099	-2.26505	0.0235097	0.403414
EPB41L5	25.6081	18.4886	32.7276	0.791303	0.281538	2.2638	0.0235866	0.404465
SRRT	96.0474	80.0041	112.091	0.481416	0.259891	2.26283	0.0236461	0.404948
FADS1	68.9146	78.5603	59.2689	-0.400634	0.234006	-2.26283	0.0236461	0.404948
SAT1	93.6603	81.0047	106.316	0.388087	0.235936	2.26192	0.0237025	0.405644
PRKCSH	132.366	109.139	155.593	0.507694	0.285112	2.26079	0.0237722	0.406568
KCNAB1	2.06923	2.80613	1.33232	-0.706557	0.424276	-2.26053	0.0237882	0.406572
LZTS1	1.50703	1.13234	1.88171	0.434484	0.365664	2.26006	0.0238175	0.406804
PCMTD2	25.7547	30.3529	21.1565	-0.500869	0.294788	-2.25902	0.0238818	0.407386
NOL4L	3.27556	4.3159	2.23522	-0.716447	0.296616	-2.2589	0.0238896	0.407386
PANX2	2.63576	1.99473	3.27678	0.514095	0.360084	2.2578	0.023958	0.407855
WDR86	0.900213	0.447633	1.35279	0.700678	0.774626	2.25533	0.0241129	0.410221
IWS1	58.6594	52.0754	65.2435	0.319736	0.245497	2.25428	0.0241786	0.411069
ATAD3A	33.1832	26.1642	40.2022	0.601012	0.301431	2.25385	0.0242054	0.411253
DDX54	69.9775	50.052	89.903	0.83236	0.303888	2.25308	0.0242538	0.411804
GNRHR2	5.47121	7.4947	3.44773	-0.933496	0.432886	-2.25254	0.0242885	0.412122
TF	2.99019	3.76104	2.21934	-0.564512	0.284984	-2.25096	0.0243883	0.413337
AC004057.1	102.327	0.232966	204.421	7.38031	4.781	2.25081	0.0243975	0.413337
ANKRD30BL	3392.92	2526.99	4258.84	0.752806	0.390942	2.2506	0.0244109	0.413337
IPO4	31.9178	23.8371	39.9985	0.723077	0.316564	2.25039	0.0244241	0.413337
FAM167A	0.814792	1.09357	0.536013	-0.446776	0.475711	-2.25013	0.0244406	0.413345
MELTF	26.8427	22.6463	31.0391	0.438221	0.287242	2.24956	0.0244769	0.413688
DNM1P34	0.110392	0.0101115	0.210673	0.261295	1.99535	2.24912	0.0245051	0.413895
NECAP2	26.8164	22.474	31.1588	0.45415	0.268902	2.24832	0.0245556	0.414477
AC091959.3	14.1156	11.7959	16.4352	0.44632	0.257589	2.24806	0.0245723	0.414487
NIPAL4	10.2668	8.63603	11.8977	0.420597	0.258943	2.24752	0.0246066	0.414794
CAPN15	23.382	20.6098	26.1543	0.329495	0.311272	2.2466	0.0246653	0.415426
WASH4P	0.774829	0.298277	1.25138	0.794211	0.952281	2.24643	0.0246762	0.415426
FAM173B	12.9579	16.159	9.7567	-0.67373	0.322134	-2.24576	0.0247194	0.415802
AC099850.2	0.69106	1.38212	0	-1.25225	2.50061	-2.24558	0.0247308	0.415802
OR2A9P	1.11159	0.687026	1.53615	0.588161	0.554367	2.24505	0.0247651	0.4161
SERINC5	42.7364	49.7961	35.6767	-0.469852	0.223532	-2.24454	0.0247979	0.4161
JMJD4	16.523	12.6288	20.4172	0.652106	0.313207	2.24444	0.0248041	0.4161
MYH14	42.1592	34.3596	49.9588	0.527229	0.35069	2.24392	0.0248376	0.4161
ZNF804A	0.062417	0.0054915	0.119343	0.154751	2.02338	2.24382	0.0248439	0.4161
PTCH1	41.2127	48.9183	33.5071	-0.532674	0.231598	-2.2438	0.0248451	0.4161
PYHIN1	0.867644	0.475947	1.25934	0.61426	0.678964	2.24234	0.0249395	0.417311
RRP12	38.8267	34.0136	43.6399	0.350417	0.275886	2.24218	0.0249498	0.417311
FAM50A	31.3904	24.8205	37.9603	0.59349	0.292949	2.24151	0.0249927	0.417733
PTTG1	293.584	255.022	332.145	0.379882	0.252034	2.24129	0.0250073	0.417733
RAB43P1	1.97229	0.862177	3.08239	1.13243	0.900179	2.24088	0.0250339	0.417907
DLG1	166.251	196.459	136.042	-0.526933	0.295413	-2.24037	0.0250666	0.418181
ZNF462	46.7877	39.2649	54.3105	0.458029	0.230754	2.23773	0.0252386	0.420779
ABHD17B	24.4444	29.7568	19.1321	-0.611402	0.308617	-2.23736	0.0252626	0.420907
CEP170B	17.57	14.3094	20.8307	0.511945	0.298839	2.23677	0.0253013	0.421281
NANS	146.935	125.358	168.511	0.423862	0.245626	2.23622	0.0253373	0.421608
TNFAIP1	45.8192	38.3646	53.2737	0.463358	0.228484	2.23573	0.0253692	0.421867
AL136295.5	1.31655	0.992745	1.64035	0.405972	0.368557	2.23527	0.0253998	0.422104
SUPT5H	40.706	34.0941	47.318	0.461336	0.263719	2.23435	0.0254604	0.422839
SLC51A	11.6579	9.05357	14.2623	0.602264	0.364004	2.23316	0.0255383	0.423861
KRT1	4.19714	5.55391	2.84036	-0.771117	0.547621	-2.2326	0.0255755	0.424011
PRDM16	1.17626	1.23553	1.11699	-0.078605	0.736106	2.23149	0.0256485	0.424871
RPS2	2636.03	2290.14	2981.93	0.380659	0.287175	2.23122	0.0256664	0.424894
AC093525.1	0.673002	0.0971905	1.24881	1.03535	1.66797	2.23092	0.0256865	0.424954
RPS6KA6	0.763943	0.912012	0.615874	-0.242777	0.491497	-2.22935	0.0257905	0.426402
CSTA	154.401	202.468	106.335	-0.922687	0.337988	-2.22865	0.0258371	0.426898
DOCK9	53.3544	43.0969	63.6121	0.551128	0.228871	2.22715	0.025937	0.427803
ATXN3	24.0305	27.0007	21.0603	-0.34401	0.283164	-2.22709	0.0259414	0.427803
TRIM27	17.1199	10.1992	24.0405	1.16086	0.549196	2.22709	0.0259415	0.427803
FAM219A	9.78834	7.97262	11.6041	0.490288	0.281513	2.22583	0.0260254	0.428913
KSR1	7.20454	6.28034	8.12874	0.326408	0.330271	2.22402	0.0261471	0.430283
WSB2	60.1281	68.7067	51.5496	-0.407618	0.229495	-2.22394	0.0261528	0.430283
TUBB6	72.529	64.2832	80.7747	0.324944	0.247208	2.22385	0.0261585	0.430283
MRPL16	85.6562	73.0622	98.2503	0.422334	0.258491	2.22341	0.0261883	0.430498
OSGIN1	13.0469	10.7551	15.3387	0.475011	0.304765	2.21875	0.0265039	0.435396
ATXN7	7.50677	6.14956	8.86397	0.464313	0.246172	2.21851	0.0265199	0.435396
TRIM72	0.955775	1.24664	0.66491	-0.432325	0.369264	-2.21822	0.0265396	0.435441
CHURC1-FNTB	3.59759	1.31933	5.87585	1.56783	0.73163	2.21787	0.026564	0.435566
MGARP	0.749474	1.19944	0.299513	-0.759161	0.833156	-2.21689	0.0266305	0.436379
CTSE	1.43454	1.15616	1.71293	0.331391	0.531867	2.2157	0.0267119	0.437434
PRKG2	0.676121	1.00338	0.348861	-0.570694	0.634512	-2.21307	0.0268931	0.439248
OR7E25P	2.85036	3.60241	2.09831	-0.570906	0.306621	-2.21291	0.0269041	0.439248
CYBRD1	8.90528	11.0101	6.80047	-0.622615	0.293034	-2.21289	0.0269051	0.439248
RUVBL1	121.306	103.062	139.55	0.433646	0.247962	2.21285	0.0269077	0.439248
SLC1A5	112.154	94.6637	129.645	0.449608	0.251213	2.21236	0.0269418	0.439253
NFE2L3	57.3452	47.7573	66.933	0.478495	0.274355	2.21236	0.026942	0.439253
EEF1D	511.89	409.653	614.128	0.582967	0.299821	2.21206	0.0269625	0.43931
HCFC1	40.3705	34.1243	46.6166	0.438993	0.241381	2.21164	0.0269916	0.439388
GPATCH3	12.6921	11.2669	14.1173	0.301425	0.351729	2.2115	0.0270013	0.439388
PLXNB3	0.316956	0.125054	0.508857	0.423462	0.959888	2.21027	0.0270867	0.440501
EFCAB11	28.7625	35.4434	22.0815	-0.658921	0.304694	-2.20961	0.0271323	0.440963
SLC16A7	15.9127	19.929	11.8964	-0.698527	0.438557	-2.20898	0.0271757	0.441392
PFKFB3	94.7713	80.6001	108.942	0.430106	0.231346	2.20843	0.0272143	0.441599
GMDS	21.3678	17.1093	25.6261	0.556109	0.30518	2.2081	0.0272371	0.441599
JMJD6	38.9658	31.5528	46.3788	0.541462	0.282767	2.20806	0.0272398	0.441599
TRIM44	54.4155	39.6721	69.1589	0.786586	0.225703	2.20742	0.0272844	0.442046
SLFN5	125.927	92.4211	159.433	0.780146	0.288721	2.20691	0.0273201	0.442347
IGF2BP2	107.634	99.0614	116.206	0.22816	0.223612	2.20458	0.0274837	0.444717
ZNF441	2.45833	3.33441	1.58224	-0.747214	0.388625	-2.20424	0.0275072	0.444817
KLHL13	15.25	19.3956	11.1044	-0.75273	0.255711	-2.20271	0.027615	0.446281
VWA3B	3.36381	2.56327	4.16434	0.535379	0.554392	2.20209	0.0276592	0.446576
CAMK1D	3.75196	2.87502	4.6289	0.538649	0.30108	2.20196	0.0276678	0.446576
CASD1	5.47677	7.34259	3.61095	-0.855431	0.351784	-2.20163	0.0276918	0.446577
NEFM	1.18535	1.61281	0.757896	-0.571749	0.417644	-2.20124	0.0277191	0.446577
NUDT14	14.5687	11.7047	17.4327	0.536909	0.387381	2.20123	0.0277198	0.446577
TNXB	0.0201628	7.5e-06	0.040318	0.0570138	2.38322	2.20019	0.0277937	0.447489
SAMD12	11.1304	14.9572	7.30359	-0.942396	0.302781	-2.19952	0.027841	0.447971
MACF1	65.2803	58.8558	71.7049	0.280562	0.222364	2.19774	0.0279678	0.449652
MRPL28	59.3332	49.165	69.5014	0.49097	0.288488	2.19756	0.0279803	0.449652
ADAM32	3.774	4.81724	2.73076	-0.640865	0.321817	-2.19714	0.0280106	0.449859
RAPGEF3	4.52948	3.45597	5.60299	0.567379	0.3616	2.19607	0.0280866	0.450407
AC241556.3	6.61582	3.59517	9.63648	1.21083	0.757438	2.19599	0.0280928	0.450407
SCRIB	41.1722	35.9564	46.388	0.358701	0.331902	2.19593	0.028097	0.450407
VWF	0.302202	0.407817	0.196587	-0.234534	0.59664	-2.19513	0.0281541	0.451042
GAN	10.2879	11.5821	8.99382	-0.332258	0.248923	-2.19405	0.0282318	0.452007
TBC1D2	68.8842	58.6822	79.0863	0.424255	0.249905	2.19291	0.0283135	0.453034
WASH3P	13.4758	11.6075	15.3442	0.374502	0.335795	2.1926	0.0283363	0.453118
FAM129B	132.266	106.519	158.012	0.564544	0.301033	2.19093	0.0284568	0.454763
HLA-DOA	0.226527	0.069679	0.383375	0.371014	1.15452	2.18929	0.0285759	0.456384
AXIN1	19.1969	15.3849	23.0089	0.551202	0.302309	2.18859	0.028627	0.456918
POPDC3	0.656421	1.12416	0.188687	-0.83752	1.08567	-2.18797	0.0286716	0.457346
HELB	7.02829	4.94086	9.11571	0.767853	0.253071	2.18725	0.0287244	0.457586
SELENOS	64.2988	53.7058	74.8919	0.472252	0.242593	2.1872	0.0287277	0.457586
ANXA2R	1.92353	1.3152	2.53186	0.609291	0.444313	2.18704	0.0287398	0.457586
ZEB1	1.49753	1.07263	1.92243	0.495707	0.568025	2.1865	0.0287793	0.457934
HYOU1	90.618	78.7464	102.49	0.375996	0.273138	2.18591	0.0288224	0.458302
TAF4	18.2444	16.0891	20.3998	0.324525	0.277546	2.18569	0.028838	0.458302
PPM1G	169.928	143.142	196.714	0.455924	0.256257	2.18543	0.028857	0.458323
QPRT	3.87852	4.98604	2.77099	-0.66666	0.338276	-2.18517	0.0288765	0.458349
WDR1	131.904	101.573	162.235	0.670299	0.235802	2.18456	0.0289209	0.458774
LGALSL	14.0534	16.5317	11.5749	-0.479417	0.262379	-2.18336	0.0290096	0.459898
ITPR3	29.1539	24.4637	33.8441	0.452474	0.256096	2.18244	0.0290772	0.460686
LIMK1	39.6604	33.6316	45.6893	0.431003	0.262455	2.1813	0.0291615	0.461738
SLC25A25	18.7074	14.2152	23.1994	0.669456	0.292304	2.18006	0.029253	0.462903
SLC15A2	2.4335	3.17147	1.69552	-0.62999	0.374352	-2.17845	0.0293723	0.464507
L3HYPDH	60.7247	51.2832	70.1663	0.444846	0.300228	2.17762	0.0294341	0.4652
TTLL6	0.734003	0.524475	0.94353	0.350367	1.0816	2.17732	0.0294567	0.465271
PSMB3	483.34	423.839	542.841	0.356267	0.242363	2.17655	0.0295138	0.465889
XPO6	128.486	122.887	134.085	0.124843	0.22921	2.17586	0.0295655	0.466104
SOST	1.10763	1.55973	0.655533	-0.628695	0.521703	-2.17568	0.029579	0.466104
DDX39A	165.619	142.62	188.619	0.400847	0.274873	2.17449	0.029668	0.46718
ADAMTS14	0.587988	0.409796	0.766181	0.325146	0.458857	2.17318	0.0297666	0.468447
CHAF1A	53.9813	46.6842	61.2784	0.385218	0.277333	2.17286	0.0297906	0.468539
CDK14	13.4505	16.4029	10.4981	-0.597931	0.259781	-2.17192	0.0298614	0.468932
ANO4	0.615813	0.436978	0.794648	0.320662	0.691594	2.1714	0.029901	0.468932
CCDC85C	37.8009	29.3725	46.2293	0.636915	0.247083	2.1714	0.0299012	0.468932
CTTN	304.726	256.568	352.885	0.458325	0.250045	2.17111	0.0299228	0.468932
RPL21P75	2.38449	1.08561	3.68338	1.16708	0.897823	2.17076	0.0299494	0.468932
UBE2O	25.8736	22.269	29.4782	0.389372	0.248051	2.17075	0.0299498	0.468932
OSBPL9	40.001	50.3192	29.6828	-0.742065	0.291522	-2.17061	0.0299608	0.468932
INA	0.518828	0.757342	0.280315	-0.456896	0.61382	-2.16984	0.0300191	0.46956
EGLN2	16.8597	13.7943	19.9251	0.500188	0.290231	2.16953	0.0300424	0.469567
HOMER2	23.257	27.1843	19.3297	-0.471306	0.244741	-2.16935	0.0300559	0.469567
PPIL6	4.43641	6.30403	2.56878	-1.03326	0.418659	-2.16873	0.0301032	0.469681
RAB24	6.28466	4.60649	7.96284	0.676859	0.385623	2.16848	0.0301222	0.469681
RIPK3	3.51463	2.65126	4.37799	0.558671	0.398989	2.16839	0.0301288	0.469681
RFXAP	4.49831	5.92704	3.06958	-0.76736	0.386283	-2.1683	0.0301359	0.469681
FAM207A	36.8576	29.3062	44.4089	0.583364	0.353344	2.16791	0.0301654	0.469712
SLC35G1	8.75921	11.158	6.36038	-0.72406	0.304862	-2.16779	0.0301744	0.469712
ZBTB7C	2.70781	3.82158	1.59404	-0.894305	0.450168	-2.16755	0.0301933	0.469724
ZNF579	6.88905	5.04479	8.7333	0.687235	0.388267	2.1673	0.0302119	0.46973
KLHL29	2.15715	1.75619	2.55811	0.368438	0.313964	2.16663	0.030263	0.469918
MPC1	30.9909	40.2105	21.7713	-0.855797	0.368095	-2.1663	0.0302884	0.469918
CYTH3	56.9098	63.37	50.4495	-0.323233	0.22722	-2.16617	0.0302979	0.469918
FGF14	0.742495	0.980013	0.504977	-0.395768	0.408622	-2.16596	0.0303143	0.469918
AL353813.1	1.57526	0	3.15052	2.05329	2.41276	2.16595	0.030315	0.469918
KLF7	31.2152	24.6523	37.7781	0.596151	0.235574	2.16568	0.030336	0.469962
BMS1	34.9442	30.1925	39.6959	0.383685	0.224972	2.16489	0.0303958	0.470607
RASA4B	4.37376	2.90324	5.84429	0.810231	0.505961	2.16437	0.0304357	0.470942
SUSD4	5.46693	7.00122	3.93263	-0.697861	0.351261	-2.16272	0.0305629	0.472434
RASSF9	0.32619	0.467374	0.185006	-0.308342	0.57891	-2.16264	0.0305687	0.472434
TCAF1P1	4.0417	3.06131	5.02208	0.568318	0.381849	2.15991	0.0307796	0.475168
PTPRZ1	13.0689	11.744	14.3938	0.272527	0.280284	2.15987	0.030783	0.475168
IL36RN	0.681846	0.995363	0.368329	-0.544237	0.682927	-2.15964	0.0308008	0.475168
GLRB	0.736074	0.889728	0.582419	-0.256046	0.725735	-2.15899	0.030851	0.475439
N4BP3	2.21882	1.73859	2.69905	0.433719	0.337358	2.15894	0.0308552	0.475439
HBP1	26.1601	31.1831	21.1371	-0.539835	0.242788	-2.15768	0.0309525	0.476654
PSMB7	735.276	650.573	819.978	0.333416	0.226446	2.15682	0.0310195	0.4774
GAK	22.7832	18.4649	27.1014	0.52977	0.265954	2.15509	0.0311548	0.478712
NUMBL	16.1722	11.7063	20.638	0.768027	0.307035	2.15498	0.0311633	0.478712
ZNF710	8.27872	8.8872	7.67025	-0.189489	0.298532	2.15491	0.0311687	0.478712
NCF4	0.194168	0.0310105	0.357325	0.396707	2.05715	2.15478	0.0311788	0.478712
CCL17	0.989037	0.282589	1.69548	1.07149	1.29844	2.15449	0.031202	0.478782
COL1A2	0.306294	0.442001	0.170588	-0.300838	0.599926	-2.15416	0.0312277	0.478893
AL139011.2	1.05804	0.887397	1.22867	0.239788	0.761011	2.15273	0.0313396	0.480271
DHX34	7.58189	6.3952	8.76858	0.401561	0.272722	2.15254	0.0313548	0.480271
AC090498.1	12.1385	0	24.277	4.65976	2.59564	2.15101	0.0314753	0.481831
CCDC102A	1.36335	1.03332	1.69338	0.405581	0.516282	2.14962	0.0315852	0.483096
SNAPC4	14.7216	11.8951	17.548	0.524441	0.28948	2.14949	0.0315953	0.483096
AC139495.2	0.30719	0.0532315	0.561148	0.567784	1.69915	2.14809	0.031707	0.484189
PLD1	24.3017	30.0135	18.59	-0.662779	0.279669	-2.14796	0.0317166	0.484189
LIPT1	9.43258	7.31036	11.5548	0.595257	0.369766	2.14788	0.031723	0.484189
RGS7	3.17691	2.23718	4.11665	0.660464	0.474358	2.14751	0.0317523	0.484211
STAT6	119.35	99.3492	139.351	0.484015	0.243654	2.14739	0.031762	0.484211
SEPT9	186.766	164.852	208.679	0.338286	0.250821	2.14682	0.0318073	0.484419
WDR3	48.0854	37.034	59.1369	0.66096	0.235208	2.14649	0.0318337	0.484419
FO538757.1	5.05259	3.30021	6.80498	0.859989	0.54609	2.14642	0.0318392	0.484419
PNKP	28.1384	20.4648	35.812	0.7782	0.339779	2.14628	0.0318507	0.484419
TFPT	4.77172	3.20736	6.33609	0.802096	0.5363	2.14536	0.0319242	0.485251
IFT57	46.9977	38.5104	55.485	0.515634	0.237406	2.145	0.0319531	0.485404
DLX5	6.12943	7.9543	4.30455	-0.75535	0.342662	-2.14456	0.0319882	0.485462
DIP2C	0.547963	0.452101	0.643823	0.178913	0.504275	2.14448	0.0319945	0.485462
LHFPL5	7.54699	10.2005	4.89347	-0.926373	0.44379	-2.14405	0.0320285	0.48553
ZRSR2	18.0373	15.5046	20.57	0.386161	0.273062	2.14393	0.0320382	0.48553
ST14	119.729	98.4643	140.994	0.513584	0.294003	2.14372	0.0320553	0.48553
FAM171B	7.33338	9.72301	4.94376	-0.85126	0.406877	-2.14301	0.0321126	0.486113
GAS6	58.8115	49.5107	68.1123	0.452352	0.308725	2.14122	0.0322566	0.488006
NUP62	53.1666	46.0084	60.3248	0.383553	0.234058	2.14029	0.0323317	0.488708
ANOS1	3.20256	3.67585	2.72927	-0.326335	0.336367	-2.14017	0.0323408	0.488708
AC093392.2	13.7325	20.3285	7.13643	-1.39032	0.603309	-2.1395	0.0323955	0.489248
ANKRD37	2.94896	1.92715	3.97076	0.763966	0.526504	2.13906	0.0324306	0.489491
INHBA	2.98964	3.54708	2.43221	-0.405803	0.308043	-2.13638	0.0326482	0.492488
NUDT18	8.18872	6.0511	10.3263	0.683763	0.404763	2.13567	0.0327066	0.492814
ZNF865	4.56241	3.51113	5.61369	0.551966	0.360153	2.13557	0.0327146	0.492814
UGT3A2	0.196566	0	0.393132	0.478332	2.41713	2.13542	0.032727	0.492814
TACC3	73.0318	64.0309	82.0328	0.352557	0.278002	2.13359	0.0328761	0.494139
FAM167B	2.47538	1.53819	3.41257	0.797819	0.619338	2.13328	0.0329016	0.494139
VLDLR	0.795481	0.400243	1.19072	0.645728	0.397277	2.13312	0.0329146	0.494139
AGAP2	3.391	2.87543	3.90657	0.340358	0.338492	2.13296	0.0329277	0.494139
GALM	8.09699	10.314	5.87995	-0.717643	0.318903	-2.13271	0.0329483	0.494139
GJB6	1.48461	0.975873	1.99334	0.599269	0.52641	2.1327	0.032949	0.494139
JDP2	29.2907	23.2624	35.3191	0.582006	0.292512	2.1327	0.032949	0.494139
SMIM11B	4.73363	2.15051	7.31676	1.40044	0.636957	2.13154	0.0330443	0.495207
SPRY4	3.95781	3.33286	4.58275	0.365656	0.306477	2.13137	0.0330586	0.495207
P2RY11	8.58459	6.94266	10.2265	0.499214	0.39842	2.131	0.0330889	0.495374
NOL12	26.0156	20.8407	31.1906	0.559624	0.325894	2.13025	0.033151	0.496016
ZNF277	21.9651	18.6977	25.2325	0.413325	0.270891	2.1289	0.0332622	0.497392
AC012254.2	9.96639	0.767025	19.1658	3.51251	2.40385	2.12807	0.0333311	0.497792
RBM42	29.295	23.6851	34.9049	0.540541	0.31141	2.12794	0.0333423	0.497792
TRERF1	13.2216	11.2225	15.2208	0.408307	0.233824	2.12788	0.0333467	0.497792
SGF29	26.2144	22.2894	30.1395	0.419067	0.276519	2.12657	0.0334562	0.499137
SH3GL1	50.1121	42.3481	57.876	0.441709	0.272624	2.12609	0.0334962	0.499445
TAF4B	9.55489	7.93253	11.1773	0.447048	0.253548	2.12504	0.0335837	0.500461
NAPB	11.7775	10.2397	13.3154	0.348959	0.265513	2.12445	0.0336324	0.500898
LRRC45	17.1123	13.744	20.4806	0.542898	0.335699	2.12261	0.0337869	0.502908
FSCN1	200.089	166.922	233.256	0.480295	0.28794	2.12176	0.0338582	0.503337
ZSWIM1	10.4003	12.8377	7.96298	-0.626553	0.270301	-2.12151	0.0338788	0.503337
BX276092.2	1.64747	0	3.29494	2.10264	2.42435	2.12142	0.0338861	0.503337
APOBEC3C	35.6881	29.1929	42.1833	0.51626	0.234168	2.12098	0.0339234	0.503337
BNIP3L	25.7905	28.8457	22.7354	-0.330483	0.272286	-2.1209	0.0339301	0.503337
PAPPA	0.610389	0.833694	0.387084	-0.402698	0.383311	-2.12087	0.0339326	0.503337
TRIP10	58.437	50.1611	66.7129	0.404382	0.2636	2.1195	0.0340482	0.504633
GTF2F1	103.498	94.1689	112.828	0.258286	0.261066	2.11897	0.0340927	0.504633
HCG4P5	0.156	0	0.312001	0.391768	2.45802	2.11873	0.0341131	0.504633
HOXB4	1.45612	1.11256	1.79968	0.406272	0.375699	2.11857	0.034127	0.504633
RTKN2	35.4365	46.1093	24.7638	-0.870669	0.348275	-2.11848	0.0341343	0.504633
MORN4	7.82642	9.28674	6.36609	-0.481816	0.300866	-2.11845	0.0341372	0.504633
PSMD13	217.556	192.714	242.398	0.329382	0.254079	2.11611	0.0343355	0.507273
FAM110C	28.7634	24.4567	33.0701	0.420463	0.235968	2.11571	0.0343692	0.507481
RAB7B	10.2169	8.39611	12.0377	0.472556	0.307585	2.11546	0.0343912	0.507515
GRN	55.9466	40.8839	71.0092	0.781788	0.310369	2.11468	0.034457	0.508167
RPS7P11	0.402521	0.805041	0	-0.852032	2.36984	-2.11448	0.0344746	0.508167
MYADM	21.3572	25.512	17.2023	-0.542524	0.246046	-2.11261	0.0346343	0.510229
TELO2	10.7816	8.44931	13.1138	0.578829	0.371723	2.11186	0.0346988	0.510857
RAB36	11.0496	9.27539	12.8239	0.427972	0.265672	2.11165	0.0347165	0.510857
CCDC126	6.92508	8.3024	5.54777	-0.5066	0.357686	-2.11114	0.0347606	0.511214
MIB1	31.4267	36.1198	26.7337	-0.420553	0.268639	-2.11067	0.0348008	0.511514
UNC119B	23.0142	27.1153	18.913	-0.497644	0.234153	-2.10902	0.0349426	0.513306
OSBPL5	15.8366	12.7346	18.9386	0.537749	0.297456	2.10854	0.0349843	0.513551
NUDC	124.342	105.801	142.882	0.429966	0.270364	2.10817	0.0350159	0.513551
CA13	11.9043	10.775	13.0335	0.253155	0.306706	2.10814	0.0350189	0.513551
GABPB2	20.6169	22.7136	18.5202	-0.280751	0.246974	-2.10616	0.0351906	0.515688
SLC43A2	3.38646	3.09075	3.68217	0.194815	0.467854	2.10594	0.0352095	0.515688
PAF1	27.6985	23.1372	32.2597	0.462519	0.283437	2.10577	0.0352245	0.515688
DBNL	84.2377	64.0413	104.434	0.696913	0.262834	2.10459	0.0353274	0.516142
ZFYVE26	16.7296	14.6739	18.7854	0.336068	0.239272	2.10455	0.0353303	0.516142
HIST1H3B	1080.29	1357.76	802.834	-0.757316	0.233826	-2.10449	0.0353355	0.516142
RRP1	25.9383	22.7229	29.1537	0.346057	0.320196	2.10411	0.0353686	0.516334
ONECUT2	0.808059	1.0547	0.561414	-0.396078	0.37829	-2.10328	0.0354413	0.517103
ZFP91-CNTF	2.3283	0.394336	4.26226	1.9161	1.77494	2.10265	0.0354963	0.517585
TSPAN6	11.7723	14.5656	8.97897	-0.641398	0.288577	-2.10207	0.0355469	0.517585
BNIP3P5	3.10782	1.59633	4.61932	1.11392	0.849808	2.10201	0.0355521	0.517585
PRKAR1B	85.0181	69.0503	100.986	0.541903	0.301302	2.10166	0.0355834	0.517585
RPL3P4	32.2243	0.80682	63.6418	5.16094	3.15443	2.10136	0.0356091	0.517585
TAS2R31	0.190548	0.381096	0	-0.465814	2.41928	-2.1013	0.0356146	0.517585
PFKFB2	50.517	60.1769	40.8572	-0.54751	0.227107	-2.1013	0.0356146	0.517585
HIST1H3I	586.267	734.174	438.36	-0.742684	0.230599	-2.10094	0.0356464	0.517755
PTAFR	9.26327	8.10004	10.4265	0.328437	0.259683	2.09946	0.035776	0.519345
CTDSP2	75.2798	60.6902	89.8694	0.558753	0.233438	2.09863	0.0358493	0.519841
SDF2L1	29.08	23.2996	34.8603	0.561457	0.358596	2.09862	0.0358504	0.519841
FECH	17.7789	20.5811	14.9767	-0.433791	0.255948	-2.09786	0.0359172	0.520308
BAZ1A	58.9412	50.1217	67.7606	0.427647	0.279906	2.0978	0.0359229	0.520308
IDH1	99.96	120.463	79.4566	-0.59424	0.235954	-2.09661	0.0360283	0.521542
CTRL	2.16752	1.47538	2.85967	0.640823	0.558897	2.09554	0.0361227	0.522277
MT-ND3	5967.96	8203.03	3732.89	-1.13565	0.437489	-2.09535	0.0361398	0.522277
FKBP8	54.4102	40.7197	68.1008	0.727971	0.351662	2.09388	0.0362711	0.523784
ECT2L	0.40072	0.518112	0.283327	-0.24239	0.673966	-2.09372	0.0362852	0.523784
IL20RA	3.57472	4.48346	2.66597	-0.58089	0.325703	-2.09345	0.0363093	0.523784
PLEKHA1	37.5279	45.2865	29.7692	-0.589101	0.267301	-2.09327	0.0363251	0.523784
TMEM117	7.28224	8.90967	5.65481	-0.574439	0.319836	-2.09238	0.0364048	0.524639
SPATA6L	5.20134	6.59772	3.80497	-0.661041	0.369466	-2.09189	0.0364481	0.524827
PAOX	3.58008	2.59708	4.56307	0.629053	0.407342	2.09178	0.0364584	0.524827
ETS2	61.1103	48.7865	73.4343	0.580213	0.233312	2.09155	0.0364788	0.524828
TADA3	19.1047	15.1787	23.0308	0.570786	0.290562	2.09053	0.0365704	0.525676
TRIR	144.707	125.566	163.847	0.381238	0.260456	2.09044	0.0365785	0.525676
MOB3C	12.9096	10.869	14.9503	0.426382	0.290745	2.08897	0.0367103	0.527028
RPLP1	1003.33	801.28	1205.38	0.58851	0.35882	2.08878	0.0367276	0.527028
AC044810.9	14.032	18.4231	9.64086	-0.868158	0.361246	-2.08871	0.0367338	0.527028
CENPH	82.5597	71.0032	94.1161	0.401629	0.231016	2.08817	0.0367822	0.52743
MANF	73.2233	53.0583	93.3882	0.80409	0.244681	2.08676	0.0369099	0.528867
MRPL17	65.6752	53.4331	77.9172	0.535856	0.271414	2.08661	0.0369234	0.528867
ANK1	2.27623	2.77106	1.78139	-0.439164	0.315498	-2.08627	0.0369538	0.529009
MITD1	74.3314	62.4352	86.2276	0.459503	0.268264	2.08537	0.0370362	0.529894
PDE8A	29.2024	36.5386	21.8662	-0.715156	0.266588	-2.08389	0.0371703	0.531225
NFAM1	0.435197	0.506418	0.363976	-0.143304	0.678563	2.08338	0.0372166	0.531283
ECM2	2.0949	2.74802	1.44178	-0.618195	0.44245	-2.08333	0.0372213	0.531283
STRIP2	37.7857	45.5956	29.9758	-0.589051	0.244902	-2.08317	0.0372361	0.531283
IGSF8	10.0117	7.52818	12.4953	0.662142	0.379082	2.08274	0.037275	0.531521
RNF126	30.3706	25.8857	34.8554	0.415353	0.268609	2.08253	0.037294	0.531521
DGKZ	29.374	24.3808	34.367	0.478666	0.303291	2.08016	0.0375107	0.534316
CDK6	34.7106	40.3784	29.0428	-0.461859	0.312819	-2.07876	0.0376395	0.535559
BRI3BP	32.9051	39.4794	26.3309	-0.566659	0.235386	-2.07821	0.0376896	0.535977
UQCC3	8.40195	6.58824	10.2157	0.56368	0.349033	2.07791	0.0377174	0.536077
SEMA4B	37.3919	32.2176	42.5661	0.391256	0.298234	2.07709	0.0377933	0.536815
TSSC4	24.0118	20.8971	27.1266	0.361199	0.357692	2.07689	0.0378113	0.536815
CYP46A1	3.74121	4.81055	2.67186	-0.662163	0.362732	-2.07663	0.0378355	0.536815
RASSF10	18.611	15.6756	21.5464	0.435151	0.272868	2.07645	0.0378525	0.536815
CCDC125	13.7469	11.0718	16.422	0.529272	0.260986	2.07585	0.0379078	0.537242
TXNDC2	0.194798	0.051913	0.337684	0.346721	1.2931	2.07567	0.0379242	0.537242
HSP90AB3P	0.575526	0.29903	0.852022	0.511667	0.778408	2.07465	0.0380185	0.538283
TOP1MT	23.9761	21.16	26.7921	0.326716	0.275147	2.07432	0.0380498	0.538431
CSNK1A1P1	0.45452	0.751648	0.157391	-0.597836	1.03027	-2.07081	0.0383762	0.542253
AC098934.1	1.25495	2.0225	0.48741	-1.02294	0.822406	-2.07053	0.0384028	0.542253
NOP16	91.642	78.7168	104.567	0.405209	0.252697	2.07031	0.038423	0.542253
CD59	230.24	189.144	271.336	0.518295	0.223948	2.07021	0.0384325	0.542253
SLC7A5P1	2.0747	1.01958	3.12981	1.03202	0.900705	2.07011	0.0384422	0.542253
CRELD2	19.795	15.6828	23.9071	0.578196	0.301757	2.07007	0.0384459	0.542253
ATP11B	51.5385	61.7376	41.3394	-0.567331	0.32034	-2.06932	0.0385165	0.542756
OPHN1	8.74792	11.1645	6.33134	-0.730528	0.258389	-2.06922	0.0385252	0.542756
THSD8	30.7458	26.0187	35.4728	0.432863	0.283132	2.06902	0.0385446	0.542756
TRABD	12.3667	9.41391	15.3195	0.648085	0.344905	2.06867	0.0385769	0.542915
ADAM19	28.6975	34.1983	23.1968	-0.540689	0.240866	-2.06784	0.0386547	0.543714
TBC1D10B	29.6542	24.6632	34.6452	0.47401	0.30882	2.06759	0.0386783	0.543749
GZMB	0.190574	0	0.381147	0.465867	2.46947	2.06734	0.0387023	0.54379
SLC25A27	6.54024	9.17777	3.90271	-1.05377	0.413541	-2.06695	0.0387386	0.544005
REPS2	2.65545	3.28924	2.02167	-0.505378	0.32056	-2.06656	0.0387753	0.544223
RELL2	9.10306	7.14881	11.0573	0.565246	0.327338	2.0662	0.0388099	0.544413
PLEKHN1	6.01763	4.46694	7.56832	0.64828	0.397703	2.06589	0.0388393	0.544436
EML1	2.45719	2.85778	2.05661	-0.335837	0.465114	-2.06573	0.0388536	0.544436
CLUH	54.3845	48.7778	59.9911	0.293097	0.280557	2.06498	0.038925	0.544563
PELP1	40.056	33.4879	46.624	0.465598	0.320491	2.0649	0.0389323	0.544563
SCAF1	31.5892	27.4034	35.7751	0.372661	0.311172	2.06485	0.0389372	0.544563
MAPK8	55.1919	62.6698	47.7139	-0.386273	0.28043	-2.06475	0.0389471	0.544563
TSR3	41.4666	34.1724	48.7607	0.500561	0.312194	2.06367	0.0390494	0.545565
AC060766.5	5.18656	3.75971	6.6134	0.677666	0.474638	2.06354	0.0390609	0.545565
SERF1B	11.5131	13.2457	9.78059	-0.40209	0.373245	-2.06298	0.0391148	0.546021
NAPRT	18.7171	17.252	20.1822	0.214801	0.357606	2.06231	0.0391783	0.546612
TNFRSF10B	40.8103	31.9324	49.6881	0.622139	0.2432	2.06126	0.0392778	0.547705
SYTL5	0.155159	0.248843	0.061474	-0.234524	0.92933	-2.06014	0.0393849	0.548625
CCT7	378.263	322.901	433.624	0.424213	0.26045	2.06013	0.0393863	0.548625
AMER1	4.69409	3.8686	5.51959	0.421275	0.250491	2.05889	0.039505	0.54968
SDHAF3	17.9759	22.0512	13.9007	-0.629467	0.317222	-2.05884	0.0395095	0.54968
TRIM25	172.965	130.695	215.236	0.715408	0.22745	2.05867	0.0395259	0.54968
BAG6	25.5367	17.9655	33.1078	0.84673	0.415303	2.05818	0.0395731	0.550041
IER2	24.4798	18.2691	30.6905	0.717765	0.310874	2.0578	0.0396096	0.550115
HIST2H4B	49.6985	61.9197	37.4773	-0.709504	0.2938	-2.05768	0.039621	0.550115
UTP18	85.2232	74.6276	95.8188	0.356375	0.252333	2.05711	0.0396761	0.550553
MID1IP1	45.5662	37.6326	53.4999	0.496433	0.253411	2.05691	0.0396953	0.550553
DHX8	63.4731	55.6737	71.2725	0.350767	0.236124	2.05554	0.0398273	0.551792
TRAPPC3L	7.08137	8.99535	5.16739	-0.696596	0.333504	-2.0553	0.0398505	0.551817
EDIL3	13.8174	17.2374	10.3975	-0.678184	0.305805	-2.05466	0.0399122	0.552376
LARS2	18.0853	15.2178	20.9529	0.436833	0.242296	2.05418	0.0399585	0.55272
AEN	18.6468	14.7733	22.5203	0.576422	0.262745	2.05323	0.0400506	0.553697
DLX3	8.90552	10.9408	6.87024	-0.601421	0.288864	-2.052	0.04017	0.554825
ARL6IP4	101.845	78.2953	125.395	0.672628	0.325141	2.05157	0.0402116	0.554825
ZSCAN31	7.25302	9.11693	5.38911	-0.663084	0.385902	-2.05139	0.0402293	0.554825
ZYX	56.7811	46.9587	66.6035	0.495306	0.254998	2.05137	0.0402309	0.554825
TACC1	65.8662	50.9522	80.7802	0.654568	0.227451	2.05123	0.0402449	0.554825
RNPS1	222.827	185.75	259.903	0.482401	0.238549	2.05087	0.0402798	0.554825
TRIM47	34.626	29.9627	39.2893	0.379865	0.302976	2.0507	0.040296	0.554825
RP2	16.9693	14.08	19.8587	0.468013	0.292697	2.05062	0.0403041	0.554825
CDKN3	154.243	201.676	106.811	-0.910672	0.323982	-2.0504	0.0403255	0.554825
SGPP1	13.7523	17.5704	9.93431	-0.764139	0.348481	-2.04999	0.0403651	0.555074
RNF223	5.89307	7.41749	4.36866	-0.648828	0.315345	-2.0496	0.0404035	0.555306
NOC4L	15.9469	13.3297	18.5641	0.449197	0.327292	2.04911	0.0404509	0.555646
MALL	116.51	131.681	101.338	-0.374618	0.238417	-2.04891	0.0404712	0.555646
ABHD17A	11.0159	9.04347	12.9884	0.477974	0.348334	2.04852	0.0405089	0.555867
MSL3	31.939	26.3571	37.5209	0.493731	0.242886	2.0482	0.0405403	0.556003
AGO1	11.4444	13.2266	9.66215	-0.416093	0.234186	-2.04757	0.0406017	0.55643
GRWD1	34.4348	23.3726	45.4971	0.931884	0.285932	2.04744	0.0406146	0.55643
FGL2	0.230548	0.377254	0.083842	-0.34564	0.873826	-2.04684	0.0406735	0.556753
GCSHP3	1.56553	0.358901	2.77216	1.47295	1.60097	2.04676	0.0406812	0.556753
RNF128	4.45569	5.79392	3.11745	-0.722494	0.383664	-2.04614	0.0407424	0.556995
PPARG	23.5957	27.9567	19.2347	-0.517062	0.250709	-2.04553	0.0408025	0.556995
SIK3	37.6647	34.8636	40.4658	0.2094	0.230441	2.04552	0.0408031	0.556995
TUBB4B	766.174	667.056	865.293	0.374888	0.243079	2.04542	0.0408134	0.556995
SDAD1	37.4516	31.154	43.7493	0.476865	0.279335	2.04529	0.0408266	0.556995
NAB2	25.78	21.6612	29.8987	0.447321	0.285875	2.04527	0.0408284	0.556995
GPR153	4.92643	4.0202	5.83265	0.4447	0.310317	2.04476	0.0408785	0.557385
ANAPC16	67.2157	81.3967	53.0348	-0.608699	0.248042	-2.04451	0.0409036	0.557433
AC004980.3	4.81332	7.73426	1.89237	-1.59443	0.910384	-2.0437	0.0409836	0.558229
TWF2	22.6288	17.9391	27.3186	0.580386	0.344991	2.04303	0.0410493	0.55849
PKIA	3.98745	4.70414	3.27075	-0.417518	0.386501	-2.04296	0.0410564	0.55849
ALG10B	4.89246	6.11974	3.66517	-0.609896	0.388866	-2.04285	0.0410677	0.55849
BATF3	0.263967	0.0556185	0.472315	0.479998	2.07786	2.04137	0.041214	0.559575
ARC	0.186835	0.0228205	0.350851	0.401315	1.49333	2.04109	0.0412419	0.559575
RPS9	88.4912	77.2121	99.7702	0.365605	0.272384	2.04108	0.0412428	0.559575
CALB2	25.377	20.7436	30.0103	0.512156	0.277842	2.04081	0.0412696	0.559575
PLA2G12A	21.0758	23.9721	18.1794	-0.380756	0.28243	-2.04075	0.0412756	0.559575
VGF	2.15204	1.59537	2.70871	0.514974	0.420985	2.04073	0.0412775	0.559575
OMA1	28.6063	36.7351	20.4775	-0.813083	0.294565	-2.03962	0.041388	0.560779
C22orf39	22.6661	19.9028	25.4295	0.338453	0.418413	2.03911	0.0414389	0.561174
RHOB	11.8715	14.4612	9.28173	-0.588569	0.259104	-2.03853	0.0414974	0.561672
ABHD4	41.4451	56.5266	26.3635	-1.07198	0.239197	-2.03807	0.0415424	0.561987
AADACP1	1.09167	1.79566	0.38769	-1.0105	0.872471	-2.03769	0.0415806	0.56217
ACOX1	23.4042	27.1582	19.6501	-0.447409	0.232512	-2.0375	0.0415995	0.56217
SOD1	327.053	284.411	369.695	0.377191	0.261173	2.0371	0.0416396	0.562417
POMP	230.178	199.309	261.046	0.387599	0.257036	2.03647	0.0417029	0.562979
ICOSLG	4.50804	4.44639	4.5697	0.0322994	0.306647	2.03612	0.0417378	0.563155
NEGR1	2.65363	3.07965	2.22762	-0.337975	0.26293	-2.03582	0.0417687	0.563278
TUBA4A	177.447	152.686	202.208	0.402968	0.251181	2.03546	0.041805	0.563473
XPR1	59.7347	49.9984	69.471	0.466577	0.256164	2.03391	0.0419602	0.565133
AC044860.1	0.916724	0.194222	1.63923	1.14404	1.30477	2.03377	0.0419751	0.565133
PYY	0.469074	0.15204	0.786108	0.632628	1.20533	2.03358	0.0419938	0.565133
TMPRSS4	44.8832	53.394	36.3723	-0.541476	0.237796	-2.0323	0.0421231	0.566288
ITGB8	33.3577	40.9076	25.8078	-0.644561	0.345261	-2.03214	0.0421395	0.566288
EBNA1BP2	242.695	211.677	273.714	0.369264	0.246814	2.03208	0.0421455	0.566288
OSGEPL1	7.09816	9.16522	5.03109	-0.753151	0.360431	-2.03147	0.0422069	0.566819
HSPH1	277.165	241.323	313.007	0.37386	0.253076	2.03121	0.0422333	0.566878
C5orf24	16.6224	19.1046	14.1401	-0.409159	0.327538	-2.0298	0.0423764	0.568505
VWA1	0.654171	0.237613	1.07073	0.742578	0.742725	2.02925	0.0424332	0.568971
TMEM254	16.1374	19.0041	13.2707	-0.48724	0.289024	-2.02804	0.0425565	0.570299
EIF3G	116.318	102.462	130.174	0.342386	0.238243	2.02784	0.0425764	0.570299
ZNF276	17.4415	12.5716	22.3115	0.780443	0.293548	2.02731	0.0426305	0.570728
HIST1H2BI	681.73	855.393	508.067	-0.750416	0.245066	-2.02684	0.0426789	0.570748
KLF14	0.0731347	0.0079665	0.138303	0.175437	2.08671	2.02665	0.0426984	0.570748
AKR1C1	7.5916	9.17649	6.0067	-0.538434	0.312217	-2.0262	0.0427447	0.57088
BCL2	1.30095	1.63555	0.966345	-0.422584	0.36309	-2.02612	0.0427524	0.57088
BHLHE40	23.1592	21.0069	25.3116	0.25774	0.254971	2.02561	0.042805	0.571287
ZNF438	2.62903	1.9692	3.28886	0.530524	0.343496	2.02478	0.0428895	0.572119
LCE1E	3.21489	4.41267	2.0171	-0.843176	0.524966	-2.02422	0.0429476	0.572597
NDUFA2	66.7662	82.5552	50.9772	-0.684852	0.250968	-2.02295	0.0430785	0.574028
MAP3K11	21.8587	19.3055	24.4119	0.323634	0.288539	2.02275	0.0430993	0.574028
ANXA7	163.909	139.814	188.004	0.424627	0.225525	2.02146	0.0432325	0.575
RIN1	14.1956	11.4335	16.9578	0.53038	0.305079	2.02145	0.0432336	0.575
ALPP	25.0056	29.6723	20.3389	-0.523451	0.261593	-2.02139	0.0432391	0.575
USP15	107.357	82.0288	132.686	0.687165	0.314357	2.02109	0.0432703	0.575118
SCAI	11.1534	12.9971	9.30958	-0.441148	0.323003	-2.02061	0.0433198	0.575297
SETD1A	14.7531	13.103	16.4032	0.30335	0.275422	2.02053	0.0433283	0.575297
GABPB1	45.0515	37.9541	52.1488	0.448262	0.256823	2.02023	0.0433596	0.575417
NASP	249.848	219.725	279.971	0.348169	0.235307	2.01981	0.0434032	0.57549
ZNF774	5.31839	6.49061	4.14616	-0.541587	0.328635	-2.01975	0.0434096	0.57549
WDR24	8.11575	6.10491	10.1266	0.647123	0.345204	2.01908	0.0434791	0.576115
HIST1H2BC	579.982	721.735	438.23	-0.718489	0.249432	-2.01873	0.0435153	0.576299
CCDC137	31.9699	27.5491	36.3907	0.389232	0.30062	2.01816	0.0435742	0.576782
PCLAF	180.928	211.417	150.44	-0.488154	0.250837	-2.01677	0.0437194	0.578227
SMTN	9.85912	6.98485	12.7334	0.782351	0.34424	2.01669	0.043728	0.578227
PTMAP2	1.39672	0.168456	2.62498	1.63337	2.15448	2.01573	0.0438282	0.579026
AL669918.1	3.26626	0.135769	6.39675	2.70322	2.80199	2.01534	0.0438688	0.579026
H1F0	296.18	260.85	331.51	0.344659	0.226704	2.01528	0.0438749	0.579026
DNMT1	199.731	150.375	249.086	0.724297	0.244934	2.01525	0.0438781	0.579026
DDHD1	3.94069	5.08774	2.79364	-0.682323	0.31324	-2.01458	0.043949	0.579664
TSHZ1	4.82443	5.79	3.85886	-0.482795	0.270247	-2.01421	0.0439879	0.579882
TGS1	31.7596	28.6039	34.9153	0.278814	0.235913	2.01352	0.0440601	0.580536
SLC35E3	16.4244	19.0828	13.7661	-0.443668	0.25921	-2.01276	0.0441396	0.580991
CREB3L2	12.5188	14.8315	10.2061	-0.498519	0.248839	-2.01222	0.0441963	0.581274
PPP4C	115.448	95.2927	135.603	0.504491	0.293128	2.01213	0.0442061	0.581274
PALLD	26.7009	22.5249	30.8771	0.438333	0.242739	2.01159	0.0442629	0.581338
APOO	33.8543	44.7394	22.9693	-0.93225	0.273328	-2.01154	0.0442681	0.581338
LAMB1	63.2091	57.6938	68.7244	0.248453	0.22835	2.01141	0.0442819	0.581338
EFNB1	21.5324	17.8494	25.2155	0.475903	0.298041	2.01106	0.0443186	0.581338
KRT14	1920.1	1425.4	2414.8	0.760119	0.350014	2.01092	0.0443342	0.581338
TRIM45	2.15872	2.80561	1.51182	-0.599392	0.357795	-2.01081	0.044346	0.581338
UBAC1	153.789	134.631	172.946	0.358947	0.264481	2.01023	0.0444073	0.581846
ITGB6	18.8681	14.209	23.5271	0.689451	0.30829	2.00814	0.0446281	0.584011
CLIC4P3	0.224065	0	0.44813	0.534192	2.52742	2.00804	0.0446395	0.584011
SMYD2	52.584	45.8512	59.3167	0.364473	0.238087	2.00803	0.0446404	0.584011
ZNF37BP	5.97382	7.47788	4.46976	-0.632226	0.310727	-2.00691	0.0447589	0.585266
PSMA3	357.707	314.967	400.447	0.345437	0.228671	2.00636	0.0448182	0.585706
DNAJC8	168.754	143.996	193.512	0.423837	0.244087	2.00617	0.044838	0.585706
GPAM	7.77626	9.52528	6.02724	-0.582827	0.282684	-2.00566	0.0448929	0.586127
NOP53	104.885	98.674	111.096	0.169446	0.289258	2.00541	0.044919	0.586172
ZC3H3	7.36317	6.30071	8.42563	0.368552	0.273348	2.00518	0.0449437	0.586197
HFE	5.84406	6.6448	5.04333	-0.339135	0.300775	-2.00422	0.0450466	0.587243
FKBP15	59.8961	53.5276	66.2646	0.302861	0.22977	2.0035	0.0451235	0.587676
AGPAT3	47.1142	41.0213	53.207	0.367357	0.231773	2.00348	0.0451253	0.587676
KCNJ8	0.184866	0.316254	0.053478	-0.321278	1.23008	-2.0029	0.0451877	0.588192
CDKN1A	17.5914	14.5319	20.6509	0.479197	0.270116	2.00251	0.0452299	0.588445
PRPF3	90.198	82.3936	98.0023	0.247524	0.227872	2.00201	0.0452839	0.588851
PATL1	50.084	44.3873	55.7807	0.323112	0.24771	1.99914	0.0455928	0.592568
GABRQ	0.593494	0.784524	0.402463	-0.347578	0.434652	-1.99853	0.0456597	0.593139
ANKRD50	5.89089	7.05675	4.72503	-0.492916	0.307122	-1.99816	0.0456994	0.593358
AKIRIN2	39.8092	35.4259	44.1925	0.311119	0.245857	1.99749	0.0457718	0.593998
GJB3	44.7535	39.6026	49.9045	0.326221	0.237443	1.99698	0.045827	0.594416
SPRR1B	9.60557	13.0698	6.14138	-0.978322	0.437704	-1.99565	0.0459722	0.596
SBF1	8.94905	8.2718	9.6263	0.196718	0.30994	1.99515	0.0460261	0.5964
MED15	122.099	111.812	132.386	0.241681	0.246	1.9943	0.0461188	0.597301
RPL35	3355.41	3096.89	3613.91	0.222673	0.232842	1.99372	0.0461828	0.59783
PXMP4	4.66451	5.47053	3.8585	-0.413374	0.283072	-1.99322	0.046237	0.598232
FOXC1	17.6089	15.1653	20.0526	0.381099	0.255862	1.9927	0.0462947	0.598679
CFAP69	3.68253	4.67625	2.68881	-0.621783	0.283992	-1.99184	0.0463888	0.599595
GAS2L1	16.2497	12.9652	19.5342	0.556184	0.329147	1.99144	0.0464327	0.599837
MGAT1	45.9108	42.1029	49.7186	0.234731	0.272608	1.99124	0.046454	0.599837
C2orf16	0.404808	0.526369	0.283247	-0.250305	0.395081	-1.99045	0.0465417	0.600669
MPIG6B	0.0489648	0	0.0979295	0.134785	2.50948	1.9902	0.0465691	0.600722
DCXR	54.3142	41.162	67.4664	0.699454	0.356786	1.98866	0.0467391	0.602588
AC093844.1	0.328205	0.110283	0.546128	0.477733	1.22614	1.98846	0.0467604	0.602588
ADAD2	2.86015	3.544	2.17631	-0.516613	0.420952	-1.98703	0.0469188	0.603995
PIWIL1	0.120512	0.0341175	0.206907	0.222914	1.26003	1.98693	0.0469297	0.603995
C1GALT1C1	35.3745	30.6201	40.129	0.379314	0.260666	1.98645	0.0469836	0.603995
RASL11B	0.662497	0.403894	0.921101	0.452499	0.747566	1.98634	0.0469955	0.603995
ZNF263	22.3039	19.1407	25.4671	0.394087	0.259815	1.98631	0.0469985	0.603995
AC073612.1	0.526996	0.117066	0.936925	0.794054	1.59778	1.98621	0.0470099	0.603995
LPAR5	5.00763	6.25536	3.7599	-0.608117	0.306661	-1.9859	0.0470446	0.604141
TRPS1	7.33433	5.42584	9.24282	0.672657	0.430695	1.98564	0.0470735	0.604212
NRARP	26.7886	22.5083	31.0689	0.448005	0.294389	1.98417	0.0472367	0.60551
IKBKGP1	3.42835	2.10488	4.75182	0.889481	0.67268	1.98404	0.0472512	0.60551
AC090099.1	4.27259	5.39688	3.14831	-0.624846	0.323692	-1.98391	0.0472655	0.60551
RPL36A-HNRNPH2	1.12419	0.381599	1.86678	1.05309	1.30398	1.98384	0.0472732	0.60551
GABBR1	2.47579	3.11168	1.8399	-0.533885	0.383339	-1.98368	0.0472919	0.60551
ACTG1	2064.35	1491.59	2637.11	0.82169	0.244237	1.98279	0.0473913	0.605768
IL12RB1	1.73926	1.14085	2.33768	0.640665	0.496546	1.98251	0.047422	0.605768
ZNF516	9.07318	8.22767	9.9187	0.242764	0.252659	1.98244	0.0474301	0.605768
GTPBP4	144.751	113.025	176.477	0.638292	0.232711	1.98238	0.0474367	0.605768
XK	4.16679	5.15549	3.17809	-0.559028	0.301932	-1.98237	0.0474383	0.605768
STUB1	62.4805	47.8757	77.0852	0.67593	0.311115	1.98204	0.0474745	0.605768
UST	5.98151	7.2438	4.71922	-0.527489	0.286269	-1.98203	0.0474762	0.605768
HIRA	59.2338	52.1958	66.2717	0.338687	0.230464	1.98144	0.0475419	0.606306
YBX1P1	0.931771	0.449978	1.41356	0.735135	0.893532	1.98121	0.047568	0.60634
PLPP5	29.9911	38.5288	21.4535	-0.815962	0.278392	-1.98063	0.0476328	0.606866
TTC7A	25.7128	21.8327	29.593	0.422103	0.263237	1.98023	0.0476782	0.607145
DDRGK1	48.2166	39.8835	56.5497	0.493291	0.322894	1.9799	0.0477145	0.607308
ALG6	12.1154	15.4429	8.78785	-0.748402	0.346857	-1.97914	0.0478002	0.608003
HARS	106.267	90.0556	122.478	0.439428	0.246645	1.97875	0.0478441	0.608003
RGS16	0.532865	0.301337	0.764393	0.439178	0.733436	1.97858	0.047863	0.608003
CLEC4E	1.72716	2.34363	1.11068	-0.663708	0.485134	-1.97858	0.0478633	0.608003
FZD7	3.98765	4.89956	3.07574	-0.533544	0.288666	-1.97772	0.0479604	0.608937
BICDL1	17.2183	15.1656	19.2709	0.326487	0.309719	1.97734	0.0480028	0.609176
MYO9B	32.9548	30.0633	35.8462	0.246302	0.25519	1.97675	0.0480704	0.609733
CNTF	3.15664	4.19552	2.11775	-0.736759	0.44304	-1.97639	0.0481109	0.609948
MTHFD1L	41.9231	37.3946	46.4515	0.30555	0.251481	1.97611	0.0481426	0.61005
THOC3	117.777	88.6157	146.939	0.723176	0.257672	1.97573	0.0481853	0.610292
MPV17L	7.87268	10.068	5.67737	-0.729041	0.364051	-1.97482	0.0482889	0.611207
AKAP8L	30.9061	27.7306	34.0817	0.288131	0.253712	1.97458	0.0483157	0.611207
SDHA	200.345	202.069	198.62	-0.0247066	0.244076	1.97442	0.0483339	0.611207
CHRNB2	1.8134	2.04895	1.57786	-0.242144	0.41378	1.97385	0.0483986	0.611494
AC008687.8	0.212565	0.0575375	0.367593	0.37093	1.46471	1.97346	0.0484434	0.611761
CLHC1	22.2053	29.5198	14.8909	-0.941549	0.317437	-1.97322	0.04847	0.611798
ABHD3	95.8229	126.671	64.9752	-0.952429	0.307798	-1.97227	0.0485788	0.61287
AL110118.2	2.68089	1.43042	3.93136	1.02078	0.933659	1.97188	0.0486237	0.61287
RFESD	5.4413	6.43778	4.44481	-0.44999	0.387009	-1.97166	0.048648	0.61287
SLC25A30	18.1136	13.3477	22.8793	0.734939	0.260051	1.97144	0.0486732	0.61287
NCLN	32.8917	28.6671	37.1163	0.361544	0.314415	1.97139	0.0486796	0.61287
BRMS1	70.157	58.7738	81.5402	0.465584	0.29625	1.97123	0.0486974	0.61287
MPG	35.332	30.2781	40.3858	0.403985	0.313819	1.97026	0.0488088	0.613973
RCN1	140.327	123.421	157.232	0.346822	0.230127	1.97005	0.0488331	0.61398
ATXN1	10.8026	13.093	8.51212	-0.56714	0.253354	-1.96984	0.048857	0.613981
NUDT4P2	27.552	22.0336	33.0705	0.564784	0.425605	1.96891	0.048963	0.615015
ABO	4.3084	5.06266	3.55416	-0.412766	0.297244	-1.96832	0.0490316	0.615576
DHX38	52.9496	45.2137	60.6856	0.416613	0.253298	1.96777	0.0490949	0.616071
DDX24	75.5068	66.1757	84.838	0.353676	0.234645	1.96707	0.0491746	0.616773
ZNF408	9.34682	7.81413	10.8795	0.430586	0.334886	1.96641	0.0492512	0.617433
PPP6R1	56.4728	48.5861	64.3596	0.398465	0.278556	1.96592	0.0493082	0.617848
SMIM26	87.1947	111.483	62.9068	-0.815658	0.31651	-1.9654	0.0493674	0.61828
CORO1B	50.5275	43.0887	57.9663	0.419485	0.326058	1.9652	0.0493906	0.61828
KLC2	22.4012	18.3729	26.4294	0.501683	0.291209	1.963	0.0496463	0.62118
ISPD	1.51323	1.89399	1.13247	-0.440531	0.367771	-1.96245	0.04971	0.621676
MRPS5	85.1607	73.4831	96.8384	0.393488	0.257692	1.96162	0.0498066	0.622582
DPEP1	0.219886	0	0.439771	0.525839	2.53639	1.96086	0.0498954	0.623089
IRX6	0.0520155	0	0.104031	0.142781	2.53639	1.96086	0.0498954	0.623089
AC131160.1	0.767161	0.479729	1.05459	0.473519	0.64469	1.96051	0.0499367	0.623252
SDHD	162.998	201.203	124.791	-0.684774	0.285184	-1.96033	0.0499567	0.623252
CYB5A	114.357	136.903	91.8108	-0.571289	0.258643	-1.95991	0.0500059	0.623565
HIST1H2BJ	447.555	514.655	380.455	-0.434893	0.241764	-1.9579	0.0502423	0.626133
TFDP2	31.9717	35.9191	28.0242	-0.347111	0.245367	-1.95753	0.0502846	0.626133
SMIM10L2A	0.0410375	0.004132	0.077943	0.102332	2.21232	1.95735	0.0503058	0.626133
TESK1	7.24201	6.10651	8.37751	0.400064	0.318924	1.9573	0.0503124	0.626133
NPIPA3	0.180032	0.360063	0	-0.443673	2.66866	-1.95712	0.0503331	0.626133
AC009220.3	0.586221	1.11854	0.053906	-1.00732	2.05302	-1.95653	0.0504024	0.626693
DMWD	15.8229	14.8959	16.7499	0.159152	0.274029	1.95627	0.0504334	0.626777
OVOL2	8.94451	13.1989	4.69008	-1.31926	0.40758	-1.95555	0.0505178	0.627524
GRAMD1C	9.83284	6.54068	13.125	0.905485	0.351811	1.95397	0.0507052	0.629058
FSTL1	6.40526	7.40076	5.40977	-0.390247	0.286833	-1.95387	0.0507161	0.629058
COL12A1	21.0833	24.6411	17.5254	-0.46895	0.261535	-1.95383	0.0507216	0.629058
ABCA13	0.287473	0.376433	0.198514	-0.199688	0.509602	-1.95348	0.0507624	0.629058
ASCL2	0.509554	0.268316	0.750791	0.465093	0.820931	1.95335	0.0507782	0.629058
WNT9A	8.407	7.0058	9.80819	0.433007	0.298781	1.95327	0.0507874	0.629058
[truncated: 22,979 more rows]

## Sheet: All genes Untreated vs TNF
Symbol	ExpMean	Exp Unstimulated	Exp TNF	log2FC	lfcSE	Stat	p-value	padj
SERPINB2	857.104	204.087	1510.12	2.88131	0.0813837	37.0554	1.46763e-300	3.76125e-296
PLAU	124.617	32.2966	216.938	2.71047	0.0953052	29.1909	2.52776e-187	3.23907e-183
BIRC3	39.5833	9.28295	69.8837	2.7852	0.112999	28.0184	9.69983e-173	8.28624e-169
C3	60.3563	26.305	94.4077	1.80494	0.105732	24.9639	1.50972e-137	9.67277e-134
OLR1	102.508	43.1477	161.869	1.8833	0.10012	20.3005	1.27383e-91	6.52917e-88
KRT13	322.682	491.96	153.405	-1.67476	0.0776949	-20.0564	1.77388e-89	7.57685e-86
KRT4	45.8954	78.7145	13.0762	-2.50158	0.121108	-19.6362	7.58005e-86	2.77516e-82
ETS1	76.6898	36.5481	116.832	1.64991	0.0919813	19.3246	3.33405e-83	1.06806e-79
CCL2	252.625	22.8906	482.36	4.33859	0.235049	18.9005	1.12892e-79	3.21467e-76
TFPI2	101.509	39.0374	163.982	2.04288	0.107287	18.7336	2.63266e-78	6.74699e-75
FST	597.999	329.433	866.564	1.39261	0.0807076	18.5648	6.18615e-77	1.44126e-73
NFKBIA	125.618	51.3475	199.888	1.9402	0.110527	18.2062	4.60819e-74	9.84155e-71
NCF2	102.253	51.7487	152.757	1.54344	0.0919657	18.0657	5.93922e-73	1.10829e-69
NAV3	51.8751	31.7171	72.0332	1.15851	0.100001	18.0646	6.05434e-73	1.10829e-69
CXCL1	107.28	41.9909	172.57	2.01341	0.117324	18.0277	1.18012e-72	2.01627e-69
CTSS	24.4107	5.84772	42.9736	2.68294	0.167315	17.5015	1.39651e-68	2.23686e-65
IL32	28.3459	1.23432	55.4575	4.65926	0.288995	17.3957	8.9008e-68	1.34182e-64
ANTXR2	31.0512	9.25706	52.8454	2.3922	0.138167	16.4225	1.31967e-60	1.87892e-57
KRT15	390.998	560.994	221.002	-1.33998	0.0783935	-16.102	2.47014e-58	3.33182e-55
INHBA	10.3784	3.54708	17.2096	2.00169	0.15791	16.0523	5.51164e-58	7.06261e-55
LAMA3	373.068	235.717	510.42	1.11135	0.0725627	16.0043	1.19199e-57	1.45468e-54
C1orf74	38.6787	20.7201	56.6373	1.40798	0.0956863	15.7631	5.57976e-56	6.49992e-53
CXCL8	94.1983	10.6381	177.758	3.94108	0.2643	15.7582	6.02884e-56	6.7177e-53
TNIP1	112.074	58.5239	165.624	1.48505	0.0943266	15.722	1.06834e-55	1.14081e-52
ADAM8	41.2698	19.2483	63.2913	1.66682	0.118561	15.0348	4.34426e-51	4.45338e-48
CLDN1	180.39	111.608	249.172	1.15161	0.0827435	14.6237	1.98259e-48	1.95422e-45
TGFA	72.8285	42.5549	103.102	1.25709	0.0951666	14.4139	4.23378e-47	4.01864e-44
HDAC9	87.8259	50.9633	124.689	1.27429	0.0939019	14.3981	5.32045e-47	4.86974e-44
JCAD	13.2585	7.11072	19.4062	1.33111	0.107358	14.2029	8.78984e-46	7.76779e-43
NFKB2	62.7329	31.265	94.2007	1.561	0.12119	14.0764	5.30793e-45	4.53439e-42
TNFAIP3	173.951	21.6861	326.216	3.85036	0.283569	13.9988	1.5859e-44	1.31108e-41
RND3	271.812	175.935	367.69	1.05919	0.0846842	13.2419	5.02462e-40	4.0241e-37
IL6ST	94.4634	56.6517	132.275	1.20897	0.0922243	13.1695	1.31401e-39	1.02047e-36
HBEGF	31.3054	12.597	50.0137	1.9076	0.153966	13.0026	1.1825e-38	8.91324e-36
ITGB8	60.3256	40.9076	79.7436	0.946134	0.0818055	12.9474	2.42955e-38	1.77898e-35
NAMPT	282.635	191.469	373.8	0.961495	0.0786341	12.7459	3.28432e-37	2.33807e-34
VAV3	21.5308	35.2495	7.8121	-2.0404	0.164739	-12.6431	1.22198e-36	8.46406e-34
KLF7	38.5638	24.6523	52.4753	1.05978	0.0958867	12.4202	2.03017e-35	1.36919e-32
GJB2	42.1028	21.0357	63.1701	1.54206	0.135843	12.1259	7.69875e-34	5.05907e-31
IFIT2	60.1847	38.012	82.3575	1.09539	0.098076	12.0789	1.36526e-33	8.57163e-31
PTGS2	17.2388	8.36533	26.1123	1.53354	0.136518	12.0785	1.3713e-33	8.57163e-31
ITGA5	16.6228	8.73793	24.5077	1.38924	0.140355	12.0013	3.49806e-33	2.13448e-30
SPRR1B	48.6848	13.0698	84.2999	2.59995	0.228416	11.9931	3.86329e-33	2.30252e-30
ITGA2	107.12	78.0192	136.221	0.796231	0.0724944	11.9867	4.17394e-33	2.43113e-30
TRAF3IP3	29.2151	13.1251	45.3051	1.7129	0.14258	11.9435	7.02236e-33	3.99931e-30
ERO1A	124.541	84.4287	164.653	0.955372	0.0797617	11.9306	8.20116e-33	4.56912e-30
IGFBP3	712.485	497.743	927.227	0.896183	0.079951	11.9162	9.74093e-33	5.3115e-30
IL1A	30.9351	4.38363	57.4866	3.44146	0.318356	11.806	3.63539e-32	1.94099e-29
PTPRS	26.2246	37.6431	14.806	-1.28974	0.105429	-11.6805	1.60328e-31	8.38547e-29
PLAUR	51.3467	26.7686	75.9248	1.46999	0.145179	11.6541	2.18645e-31	1.12069e-28
PEG10	12.7592	17.3458	8.17254	-1.00006	0.129196	-11.6412	2.54423e-31	1.2785e-28
OPTN	101.366	67.4044	135.328	0.994925	0.0945327	11.5627	6.36543e-31	3.0884e-28
ID3	156.482	223.825	89.1398	-1.31856	0.106108	-11.5624	6.38696e-31	3.0884e-28
HMGCS1	92.4024	62.8882	121.916	0.944056	0.0884061	11.5396	8.33372e-31	3.95512e-28
SERPINB1	107.84	61.8235	153.856	1.30155	0.112311	11.4587	2.12685e-30	9.91034e-28
MMP9	3.5688	0.157216	6.98038	2.7858	0.487257	11.3329	9.0166e-30	4.12638e-27
SDCBP	139.359	94.8702	183.847	0.947181	0.0932395	11.3126	1.1371e-29	5.11255e-27
DUSP6	67.3518	42.0444	92.6593	1.1216	0.111272	11.2862	1.53589e-29	6.78652e-27
MAP4K4	93.7806	66.4777	121.084	0.855386	0.0787765	11.2797	1.65392e-29	7.1842e-27
CD59	270.752	189.144	352.361	0.89405	0.0835899	11.2299	2.90876e-29	1.24116e-26
HMGA2	67.4026	46.5243	88.2809	0.909686	0.0874366	11.2285	2.95423e-29	1.24116e-26
IRF6	377.673	277.214	478.132	0.784229	0.0722317	11.2174	3.34785e-29	1.38385e-26
BMP2	11.1805	5.00611	17.3548	1.61166	0.165334	11.171	5.65326e-29	2.29971e-26
ARNTL2	129.384	93.3176	165.45	0.81949	0.082819	11.1309	8.87186e-29	3.55263e-26
PPP1R15A	47.4461	27.5218	67.3704	1.26131	0.121606	11.1153	1.05696e-28	4.16735e-26
MICAL2	78.7186	52.4446	104.993	0.987849	0.0981973	11.1058	1.17576e-28	4.56551e-26
SERPINB8	60.5433	37.8505	83.2361	1.1165	0.107109	11.1026	1.21792e-28	4.65864e-26
SAA2	29.7823	7.44907	52.1156	2.65227	0.26725	11.0662	1.83042e-28	6.89852e-26
RHOBTB3	294.803	386.803	202.804	-0.928142	0.0717158	-11.0311	2.70663e-28	1.0053e-25
RELB	12.2063	3.40179	21.0108	2.32205	0.241038	10.8013	3.39498e-27	1.24295e-24
SQOR	81.2063	52.1835	110.229	1.06448	0.10865	10.7191	8.28207e-27	2.98948e-24
ABL2	78.7305	58.2343	99.2266	0.758761	0.0801075	10.6998	1.0198e-26	3.62992e-24
SQSTM1	397.325	290.027	504.622	0.796904	0.0832751	10.6878	1.16064e-26	4.07462e-24
STON1	9.68195	14.5082	4.85576	-1.4051	0.147497	-10.6841	1.20799e-26	4.18357e-24
PBX1	49.0983	66.0726	32.124	-1.01784	0.104939	-10.6797	1.26741e-26	4.33083e-24
SPRR2D	15.0402	1.09542	28.985	3.83893	0.449874	10.6045	2.84087e-26	9.57972e-24
AREG	43.0309	20.878	65.1837	1.597	0.163924	10.5848	3.50571e-26	1.16179e-23
DRAM1	56.0456	40.1255	71.9656	0.827181	0.116073	10.584	3.53597e-26	1.16179e-23
SOX9	26.0174	15.4733	36.5615	1.18912	0.124301	10.481	1.05629e-25	3.42665e-23
CD44	1289.06	1008.91	1569.21	0.636738	0.0676927	10.3898	2.76014e-25	8.84212e-23
ZC3H12C	17.9022	11.5352	24.2692	1.01139	0.109081	10.3499	4.18796e-25	1.32505e-22
OSMR	56.7455	40.1566	73.3344	0.852903	0.092771	10.3157	5.98451e-25	1.87038e-22
AKAP2	78.7036	55.5358	101.871	0.863607	0.0847193	10.292	7.65851e-25	2.36473e-22
GADD45A	85.6616	49.3513	121.972	1.28823	0.130486	10.2858	8.16791e-25	2.49199e-22
SREBF1	89.526	119.471	59.5806	-0.991762	0.104595	-10.2815	8.53552e-25	2.57351e-22
ALPP	19.383	29.6723	9.09362	-1.60349	0.152879	-9.92424	3.2659e-23	9.73239e-21
ADAM19	47.973	34.1983	61.7477	0.834056	0.0935309	9.91213	3.68713e-23	1.08613e-20
TJP2	202.159	158.288	246.03	0.633046	0.0744558	9.89641	4.31466e-23	1.25234e-20
VMP1	267.837	212.635	323.039	0.601022	0.0770141	9.89562	4.34907e-23	1.25234e-20
ANXA2	3580.36	2813.7	4347.02	0.627378	0.0698984	9.8435	7.31226e-23	2.08221e-20
PI3	19.1995	2.16955	36.2294	3.55409	0.420015	9.81637	9.57299e-23	2.66768e-20
LIPG	153.28	116.166	190.393	0.707984	0.0834591	9.81633	9.57649e-23	2.66768e-20
SQLE	78.5529	55.395	101.711	0.864951	0.100021	9.80876	1.03228e-22	2.84465e-20
F3	621.167	480.36	761.974	0.664519	0.0771733	9.80627	1.05805e-22	2.88464e-20
TAPBP	37.7883	25.7787	49.7979	0.92368	0.101834	9.76397	1.6074e-22	4.33627e-20
IFIT3	72.6879	51.5336	93.8422	0.852289	0.0950544	9.73632	2.1105e-22	5.63415e-20
CXCL16	112.221	74.1705	150.271	1.0089	0.0952128	9.72562	2.34481e-22	6.19513e-20
MET	78.696	58.5674	98.8246	0.744872	0.0804364	9.71862	2.51166e-22	6.56824e-20
NEDD4L	139.341	102.681	176.001	0.771604	0.0837654	9.71363	2.63768e-22	6.82812e-20
BIRC2	62.8631	43.3704	82.3558	0.909683	0.104245	9.69702	3.1042e-22	7.95545e-20
ID1	203.836	280.514	127.158	-1.13528	0.113809	-9.68879	3.3648e-22	8.53793e-20
ELK3	44.5695	31.5588	57.5802	0.847366	0.100151	9.68625	3.44964e-22	8.6674e-20
FOSL1	115.868	76.9784	154.757	0.99815	0.115357	9.68104	3.62998e-22	9.03196e-20
FERMT1	110.536	84.2722	136.8	0.692433	0.0804786	9.67514	3.84546e-22	9.4761e-20
UPP1	82.7502	54.2243	111.276	1.02367	0.121184	9.62744	6.12373e-22	1.49466e-19
CDKN1A	28.1874	14.5319	41.843	1.46383	0.160615	9.59586	8.32232e-22	2.01212e-19
ADRB2	18.0509	10.8375	25.2643	1.14974	0.13382	9.56336	1.13989e-21	2.7302e-19
TMEM132A	57.0883	32.914	81.2627	1.27836	0.127722	9.55098	1.28475e-21	3.04866e-19
LAYN	15.6267	6.40284	24.8507	1.80405	0.200412	9.50604	1.98052e-21	4.65659e-19
SLC7A5	426.433	534.021	318.844	-0.742225	0.0726987	-9.44897	3.42181e-21	7.9722e-19
KLF6	44.1523	29.7229	58.5817	0.955554	0.106983	9.44443	3.57351e-21	8.25062e-19
ITGB6	22.114	14.209	30.0191	1.02823	0.116545	9.43255	4.00247e-21	9.15852e-19
RFX5	78.1246	51.7921	104.457	0.998262	0.106296	9.36878	7.33733e-21	1.66408e-18
PLK2	523.551	400.363	646.738	0.690501	0.081358	9.35743	8.17012e-21	1.8367e-18
COL27A1	11.4355	6.11339	16.7577	1.31983	0.15646	9.33785	9.8309e-21	2.19084e-18
ILK	104.417	73.8539	134.981	0.861255	0.0973678	9.3313	1.04581e-20	2.31052e-18
TGFBR1	55.1617	40.6669	69.6565	0.761919	0.0925041	9.32582	1.10127e-20	2.41226e-18
NAV2	8.01647	5.59659	10.4363	0.793833	0.133145	9.2761	1.75803e-20	3.78611e-18
ZNF704	34.6378	48.4111	20.8645	-1.17625	0.0990509	-9.25827	2.07762e-20	4.43711e-18
IFNGR2	47.996	27.537	68.455	1.28325	0.145224	9.25114	2.2211e-20	4.70432e-18
LDLR	87.8772	68.3405	107.414	0.644782	0.0844814	9.22975	2.71261e-20	5.69826e-18
ZNF488	21.376	29.8985	12.8536	-1.15728	0.126627	-9.15764	5.3045e-20	1.10523e-17
GABRE	90.2078	121.235	59.1805	-1.02229	0.105267	-9.13819	6.35056e-20	1.31252e-17
IL1B	82.5421	26.4157	138.668	2.34893	0.272019	9.11935	7.55771e-20	1.54951e-17
RAPGEFL1	31.4538	43.5255	19.382	-1.12733	0.127105	-9.08452	1.04158e-19	2.11854e-17
ERRFI1	31.0601	19.3163	42.8038	1.10841	0.133879	9.07004	1.18977e-19	2.40091e-17
SEMA3C	51.1898	35.566	66.8136	0.891069	0.100701	9.03465	1.64531e-19	3.29421e-17
MACF1	71.7775	58.8558	84.6992	0.517791	0.0735674	9.02993	1.71776e-19	3.41262e-17
BASP1	47.3114	30.5099	64.1128	1.04714	0.123096	9.02337	1.82395e-19	3.5957e-17
B2M	2717.05	2056.36	3377.75	0.715695	0.0768531	8.97931	2.72475e-19	5.33052e-17
NFE2L3	61.6961	47.7573	75.635	0.652384	0.106698	8.9631	3.15682e-19	6.12902e-17
DDX58	14.966	9.45735	20.4747	1.03812	0.131344	8.9401	3.88821e-19	7.49226e-17
KLK5	76.9643	105.507	48.422	-1.10772	0.12028	-8.89229	5.98603e-19	1.14485e-16
ARHGAP31	2.62144	1.1839	4.05897	1.21193	0.19956	8.87417	7.04545e-19	1.33749e-16
ETS2	68.2646	48.7865	87.7427	0.833875	0.102847	8.83089	1.03846e-18	1.95688e-16
ARHGEF28	42.7596	32.6127	52.9065	0.681455	0.0980277	8.82216	1.12276e-18	2.1003e-16
HHLA1	79.8556	56.4194	103.292	0.861017	0.104703	8.80611	1.29566e-18	2.40617e-16
RUNX1	98.4343	79.599	117.269	0.553244	0.0809864	8.72588	2.64116e-18	4.86962e-16
LRRK1	90.787	72.3027	109.271	0.58912	0.0810047	8.6941	3.49594e-18	6.39957e-16
FAM213A	135.153	171.29	99.0165	-0.784597	0.086246	-8.68037	3.94469e-18	7.16983e-16
TNFRSF10B	44.3461	31.9324	56.7599	0.810559	0.115667	8.67458	4.1507e-18	7.49114e-16
UNC5B	13.2708	17.9044	8.63722	-0.972029	0.116139	-8.61763	6.83513e-18	1.22497e-15
GNG12	87.361	67.8735	106.849	0.646985	0.0831916	8.61034	7.28461e-18	1.29646e-15
CYP27B1	10.7029	4.54017	16.8656	1.68918	0.232304	8.60457	7.66007e-18	1.35388e-15
ALDH1A3	376.542	303.93	449.154	0.561942	0.0753819	8.59842	8.08202e-18	1.41867e-15
MPZL2	148.153	118.862	177.445	0.574107	0.0824429	8.59471	8.34759e-18	1.45532e-15
TACSTD2	527.771	425.327	630.216	0.566172	0.0733841	8.54096	1.33106e-17	2.30489e-15
CYP1B1	23.8254	31.7293	15.9215	-0.951719	0.108725	-8.53187	1.43996e-17	2.47674e-15
TRPV6	7.25491	11.1393	3.37049	-1.47382	0.18957	-8.50857	1.76092e-17	3.00859e-15
COL17A1	429.738	345.568	513.909	0.571176	0.0724926	8.50012	1.894e-17	3.21453e-15
NT5E	41.0341	29.1877	52.8805	0.835805	0.103697	8.49905	1.91142e-17	3.22276e-15
NFKBIE	13.5524	5.18529	21.9196	1.88967	0.247097	8.46876	2.48028e-17	4.15455e-15
CLCA2	15.95	22.1998	9.70027	-1.11646	0.14843	-8.46009	2.67178e-17	4.44625e-15
CARD11	37.1197	26.9068	47.3325	0.792377	0.101304	8.44582	3.01914e-17	4.9919e-15
TM4SF1	308.023	239.222	376.824	0.653346	0.0850565	8.42588	3.58044e-17	5.88201e-15
EPB41L1	132.206	163.41	101.001	-0.688715	0.0810468	-8.39433	4.68544e-17	7.64831e-15
CD47	205.199	152.905	257.493	0.748082	0.08574	8.39284	4.74536e-17	7.69709e-15
DSG4	13.2523	18.871	7.63363	-1.20262	0.148278	-8.38941	4.88608e-17	7.87551e-15
GBP4	11.8049	7.75613	15.8536	0.944691	0.127892	8.38355	5.13568e-17	8.22607e-15
FGD6	48.868	38.6065	59.1294	0.602335	0.0858701	8.37993	5.29595e-17	8.4301e-15
ARL4C	49.043	34.7895	63.2964	0.8452	0.10725	8.37562	5.49322e-17	8.69014e-15
LACTB	52.0202	31.8185	72.2218	1.15776	0.135276	8.37401	5.56882e-17	8.75569e-15
PRRC2A	4.72139	4.42865	5.01414	0.147766	0.303295	8.36769	5.87583e-17	9.18206e-15
CA2	208.255	267.019	149.49	-0.83267	0.0859472	-8.31783	8.95918e-17	1.39155e-14
SDR16C5	13.4691	6.54307	20.3951	1.50406	0.202078	8.27447	1.29033e-16	1.99208e-14
NUAK1	9.77626	5.87667	13.6759	1.09366	0.157961	8.24731	1.62003e-16	2.48612e-14
MARCKSL1	34.7751	21.0205	48.5297	1.16945	0.153227	8.21587	2.10632e-16	3.21314e-14
HOXC13	26.7865	37.2563	16.3166	-1.14354	0.138166	-8.21108	2.19211e-16	3.32422e-14
SOCS2	51.8931	36.6872	67.0991	0.853562	0.120986	8.20143	2.37546e-16	3.58108e-14
OAS3	54.6604	44.0541	65.2667	0.556624	0.0831347	8.19871	2.42988e-16	3.6417e-14
SCEL	20.1495	28.1733	12.1257	-1.15226	0.144633	-8.18892	2.6357e-16	3.9272e-14
MMP14	126.925	91.6179	162.232	0.817557	0.0889463	8.16205	3.29396e-16	4.87964e-14
NCOA7	83.8652	69.0135	98.7169	0.510207	0.0863709	8.11372	4.90926e-16	7.23072e-14
LUZP2	21.3347	28.391	14.2784	-0.943876	0.125652	-8.07881	6.53992e-16	9.57743e-14
SOAT1	67.6124	48.6829	86.5418	0.817222	0.0915473	8.06503	7.32155e-16	1.06612e-13
IL7R	68.3556	55.4887	81.2226	0.541573	0.10023	8.01876	1.06814e-15	1.54657e-13
PMAIP1	53.6629	35.0175	72.3083	1.02528	0.134306	8.01625	1.09026e-15	1.56973e-13
MPHOSPH6	191.565	144.433	238.697	0.720862	0.102479	8.00693	1.17606e-15	1.6838e-13
KRT5	1624.1	1954.99	1293.2	-0.595838	0.0683748	-7.97898	1.47549e-15	2.10076e-13
SLFN5	112.837	92.4211	133.253	0.523134	0.070698	7.97005	1.58614e-15	2.24583e-13
CSF2	8.59512	1.24165	15.9486	2.91854	0.470487	7.95495	1.79199e-15	2.52337e-13
IFNGR1	74.6831	53.8976	95.4688	0.81332	0.11337	7.948	1.89548e-15	2.65451e-13
ANXA3	162.095	119.959	204.231	0.762733	0.0965887	7.91725	2.42816e-15	3.38201e-13
SUCO	81.1215	65.4248	96.8182	0.558382	0.085247	7.89174	2.98e-15	4.12819e-13
SHROOM3	25.093	20.0938	30.0922	0.559731	0.0909625	7.83729	4.60368e-15	6.34318e-13
GPX3	31.9658	10.8135	53.118	2.19567	0.296495	7.82248	5.17936e-15	7.09821e-13
TRAF1	1.91732	0.616351	3.21828	1.38391	0.292698	7.78685	6.86983e-15	9.3649e-13
HRNR	1.43781	2.32675	0.548878	-1.10289	0.260495	-7.76769	7.99323e-15	1.08387e-12
IKBKE	24.3249	15.1368	33.513	1.09679	0.15246	7.75709	8.69011e-15	1.17216e-12
GBP3	61.2169	43.5869	78.847	0.840618	0.110819	7.75135	9.09227e-15	1.21998e-12
CCDC9B	70.015	53.5341	86.4959	0.682058	0.0913118	7.73981	9.95652e-15	1.32899e-12
ANKRD1	26.4604	16.2304	36.6904	1.12924	0.1608	7.73604	1.02562e-14	1.36189e-12
MAP2K6	8.78145	11.5466	6.01631	-0.838513	0.181432	-7.7304	1.07209e-14	1.41627e-12
UAP1	142.439	97.7896	187.088	0.928972	0.0932628	7.72962	1.0787e-14	1.41769e-12
SEMA5A	18.9909	24.5635	13.4183	-0.826184	0.0970169	-7.71262	1.23264e-14	1.61174e-12
ZMIZ2	39.3126	30.0003	48.6249	0.678783	0.105887	7.70763	1.28178e-14	1.66748e-12
UPK3BL1	37.9756	53.392	22.5591	-1.20711	0.153879	-7.70479	1.31057e-14	1.69632e-12
MXRA5	30.3194	37.4484	23.1904	-0.668489	0.0820545	-7.69955	1.36545e-14	1.75848e-12
PARP8	54.9263	35.6656	74.1869	1.03605	0.129695	7.69296	1.43771e-14	1.84229e-12
TNFSF15	9.83709	6.50637	13.1678	0.916428	0.140608	7.69142	1.45509e-14	1.85528e-12
SAA1	19.7723	5.74836	33.7961	2.36632	0.342696	7.68918	1.48077e-14	1.87867e-12
MSANTD3	127.495	97.3914	157.599	0.688776	0.0943825	7.67309	1.67904e-14	2.11973e-12
ITGB1	449.495	371.475	527.516	0.504804	0.0706388	7.66274	1.82014e-14	2.28031e-12
LACC1	9.85387	5.70434	14.0034	1.16212	0.167229	7.66246	1.82403e-14	2.28031e-12
CD82	48.8478	31.0995	66.5961	1.07439	0.140983	7.63827	2.20153e-14	2.73887e-12
DCUN1D3	19.7841	13.4382	26.1301	0.910008	0.120958	7.6235	2.46885e-14	3.0566e-12
HSPA5	336.419	279.906	392.933	0.487864	0.0723101	7.6112	2.71556e-14	3.34588e-12
OLFML2A	21.038	27.0011	15.0748	-0.800681	0.105087	-7.59009	3.19683e-14	3.92002e-12
THBS1	407.303	342.743	471.863	0.460092	0.0754588	7.56948	3.74727e-14	4.5731e-12
MMP1	33.4074	9.70297	57.1118	2.44082	0.335741	7.56318	3.93335e-14	4.77744e-12
AMIGO2	39.1767	28.0105	50.3429	0.82359	0.120194	7.56242	3.9563e-14	4.78264e-12
TRIO	86.615	68.4851	104.745	0.605814	0.0822024	7.54906	4.384e-14	5.27479e-12
SAMD4A	17.7143	12.9613	22.4674	0.749225	0.126446	7.54489	4.52662e-14	5.42094e-12
BLZF1	56.5007	42.7443	70.257	0.703937	0.107814	7.5082	5.99444e-14	7.14537e-12
PANX1	44.8663	33.7231	56.0094	0.715304	0.106156	7.45194	9.19767e-14	1.09129e-11
MACC1	184.042	154.46	213.623	0.465261	0.0715832	7.44693	9.55372e-14	1.12831e-11
MMP13	20.8943	12.6104	29.1783	1.1488	0.16606	7.43954	1.01033e-13	1.18775e-11
OAS2	23.2745	16.1445	30.4045	0.873219	0.139428	7.394	1.42477e-13	1.66731e-11
MSMO1	52.5393	37.74	67.3386	0.818877	0.113036	7.39313	1.43414e-13	1.67064e-11
CAP1	342.576	275.858	409.293	0.567507	0.0754161	7.35097	1.96777e-13	2.27162e-11
MAOA	23.1731	15.4815	30.8648	0.951116	0.124917	7.34577	2.04578e-13	2.35109e-11
IL1RN	174.822	139.168	210.476	0.593337	0.086187	7.32881	2.32203e-13	2.65665e-11
CELSR2	11.3714	14.6389	8.10393	-0.780577	0.109309	-7.32813	2.33385e-13	2.65831e-11
ZFP36L1	91.0917	73.5164	108.667	0.557501	0.0847962	7.32305	2.42393e-13	2.7487e-11
PRR9	7.79424	2.39579	13.1927	2.06333	0.347034	7.3128	2.6163e-13	2.95377e-11
ACSL4	35.2226	27.4958	42.9494	0.625097	0.111864	7.3108	2.65553e-13	2.98491e-11
HIST1H3I	572.623	734.174	411.072	-0.835188	0.107083	-7.30712	2.72928e-13	3.05441e-11
CACNG4	35.3109	45.4916	25.1303	-0.831249	0.109728	-7.28867	3.13041e-13	3.48809e-11
SLC9A7	16.9503	11.6634	22.237	0.875756	0.109773	7.26298	3.78667e-13	4.20107e-11
TNFAIP2	82.8383	56.2933	109.383	0.946084	0.120466	7.26116	3.83774e-13	4.23938e-11
NFKB1	51.9298	40.2108	63.6488	0.649601	0.0974256	7.25508	4.01433e-13	4.41542e-11
SAV1	40.4356	30.3376	50.5337	0.717624	0.114354	7.25304	4.07512e-13	4.46313e-11
ABCA12	4.8776	2.91537	6.83983	1.00167	0.159803	7.23342	4.70976e-13	5.13625e-11
LCN2	72.5868	46.6103	98.5634	1.06434	0.156983	7.22042	5.18259e-13	5.62794e-11
DCBLD2	195.006	160.353	229.658	0.51553	0.0785207	7.21874	5.24708e-13	5.67393e-11
GPRC5B	3.13223	0.777223	5.48724	1.86798	0.349464	7.20219	5.92546e-13	6.38058e-11
LIF	6.55408	3.01561	10.0925	1.4659	0.250761	7.19644	6.18053e-13	6.62739e-11
PICALM	254.209	199.23	309.188	0.631487	0.0794317	7.17025	7.48632e-13	7.99414e-11
ZBED2	51.2582	38.2273	64.2891	0.734984	0.112687	7.15511	8.3608e-13	8.8909e-11
TRAF3	24.3559	16.3728	32.3389	0.940378	0.132227	7.15412	8.4212e-13	8.91812e-11
FLNB	151.249	128.456	174.043	0.435253	0.0728994	7.14869	8.76111e-13	9.23991e-11
PHLDA1	147.818	79.4124	216.224	1.43369	0.209743	7.11629	1.10871e-12	1.16451e-10
SMAD6	18.2682	24.2242	12.3124	-0.92204	0.127017	-7.11451	1.12312e-12	1.17483e-10
PLXDC2	29.4564	35.498	23.4148	-0.580061	0.100859	-7.08745	1.3661e-12	1.42319e-10
DSE	67.514	54.8264	80.2016	0.540561	0.085196	7.08379	1.40266e-12	1.45536e-10
LAMC2	420.772	207.879	633.664	1.60333	0.236197	7.07896	1.45245e-12	1.50094e-10
IFIH1	19.094	13.6206	24.5674	0.8063	0.139192	7.06543	1.6012e-12	1.64802e-10
KRT18	656.661	547.54	765.783	0.483221	0.0748391	7.05649	1.70766e-12	1.75056e-10
DNMBP	29.7094	23.6899	35.7287	0.572986	0.0938205	7.05078	1.77921e-12	1.81663e-10
TMEM154	62.6176	51.5438	73.6916	0.507426	0.0934533	7.01618	2.2801e-12	2.31882e-10
TINCR	16.9431	22.7231	11.1631	-0.963788	0.1652	-6.99756	2.6046e-12	2.63837e-10
LYN	33.4674	26.3158	40.619	0.607507	0.111941	6.98591	2.83014e-12	2.85555e-10
MMD	8.06419	3.94088	12.1875	1.41633	0.246261	6.97893	2.97427e-12	2.9892e-10
DLG1	238.372	196.459	280.284	0.510473	0.0763006	6.9552	3.52064e-12	3.52449e-10
IVL	17.9598	25.1725	10.7471	-1.15575	0.170372	-6.9481	3.70241e-12	3.69204e-10
FGFBP1	188.227	151.84	224.613	0.561827	0.0897715	6.94674	3.73825e-12	3.71333e-10
LCP1	3.78947	1.38166	6.19728	1.59548	0.277687	6.93506	4.06058e-12	4.01793e-10
SACS	6.68825	5.09218	8.28432	0.607838	0.12358	6.92994	4.21015e-12	4.14991e-10
NCEH1	39.3571	30.5767	48.1375	0.637964	0.0983929	6.92572	4.3376e-12	4.25916e-10
TMEM171	14.2284	7.3815	21.0753	1.39715	0.231407	6.923	4.42165e-12	4.32512e-10
DRAP1	303.772	243.364	364.18	0.579571	0.0937016	6.91697	4.61412e-12	4.49622e-10
ICAM1	11.261	7.49828	15.0238	0.914974	0.184166	6.9137	4.72183e-12	4.58375e-10
RAP1B	215.129	177.117	253.141	0.512808	0.0810186	6.90551	5.00244e-12	4.83784e-10
MT2A	355.761	271.418	440.104	0.695294	0.107795	6.89738	5.29721e-12	5.10364e-10
HAS2	4.3869	2.29738	6.47642	1.18103	0.225161	6.87837	6.05415e-12	5.79935e-10
PAPSS2	16.6682	22.889	10.4474	-1.06133	0.148536	-6.87812	6.06456e-12	5.79935e-10
HLA-B	82.6445	55.955	109.334	0.953983	0.128608	6.87432	6.22865e-12	5.93412e-10
TNFRSF10A	32.6087	24.6177	40.5998	0.699438	0.122041	6.86364	6.71291e-12	6.37179e-10
FOXQ1	27.0596	36.0053	18.1138	-0.953119	0.135845	-6.8571	7.02733e-12	6.64563e-10
JAG2	43.4185	53.5175	33.3195	-0.667689	0.105283	-6.85095	7.3359e-12	6.91192e-10
TMSB10	3296.24	2786.55	3805.93	0.449635	0.0751873	6.82569	8.75058e-12	8.19069e-10
CFB	3.95959	1.60723	6.31194	1.48774	0.345686	6.82558	8.75702e-12	8.19069e-10
ARID5B	22.4006	28.2349	16.5664	-0.734871	0.100041	-6.8149	9.43272e-12	8.79061e-10
RPSAP52	29.8259	17.5766	42.0752	1.21338	0.198573	6.7912	1.11206e-11	1.0326e-09
EPB41L2	89.7727	70.8645	108.681	0.609963	0.0896826	6.78349	1.17308e-11	1.08533e-09
IER3	30.9113	19.4871	42.3355	1.08084	0.174086	6.77465	1.2471e-11	1.14967e-09
IL36G	3.42936	0.172566	6.68615	2.71259	0.740828	6.76052	1.37495e-11	1.26298e-09
PRDM1	3.17897	1.37696	4.98098	1.33126	0.397496	6.75862	1.39312e-11	1.2751e-09
ACTN1	151.701	124.323	179.078	0.522965	0.0774126	6.75531	1.42527e-11	1.29989e-09
STAT3	78.0654	61.6492	94.4816	0.607927	0.087672	6.75049	1.47347e-11	1.33908e-09
PIK3C2B	19.9929	26.6703	13.3155	-0.950755	0.117635	-6.73101	1.68494e-11	1.52585e-09
PCSK5	29.2703	35.5719	22.9687	-0.609587	0.102766	-6.71653	1.86101e-11	1.67936e-09
HIST1H3B	1090.89	1357.76	824.029	-0.719769	0.100301	-6.71351	1.89994e-11	1.70848e-09
VEGFA	54.0094	28.0394	79.9794	1.47954	0.238961	6.69624	2.13848e-11	1.91626e-09
SLC3A2	334.012	400.37	267.656	-0.579174	0.0908703	-6.69094	2.21736e-11	1.98001e-09
GSK3B	91.6206	74.4223	108.819	0.542066	0.0783301	6.68174	2.36123e-11	2.09456e-09
SPPL2A	86.9211	69.7752	104.067	0.569994	0.091357	6.68169	2.36198e-11	2.09456e-09
ETV6	22.0157	17.2171	26.8144	0.610536	0.10778	6.67837	2.4161e-11	2.13517e-09
CTSH	262.247	321.453	203.042	-0.660226	0.0903916	-6.64675	2.99634e-11	2.63884e-09
METTL7A	2.6755	4.38936	0.961646	-1.45805	0.312724	-6.64572	3.01735e-11	2.64824e-09
NMNAT2	13.7052	10.4983	16.9122	0.639524	0.1475	6.63997	3.13742e-11	2.74423e-09
ANXA5	233.258	195.081	271.435	0.47446	0.0834008	6.63155	3.32188e-11	2.89569e-09
PTPN12	99.6315	81.6484	117.615	0.521221	0.0912874	6.63086	3.33726e-11	2.89923e-09
MTSS1L	36.0132	45.3871	26.6392	-0.747009	0.115428	-6.60138	4.07358e-11	3.52695e-09
CYLD	38.0731	28.7793	47.367	0.699713	0.104328	6.59192	4.34172e-11	3.74645e-09
VEGFC	9.98438	5.47632	14.4924	1.25832	0.222835	6.58289	4.61399e-11	3.96803e-09
HLA-A	93.7361	74.4368	113.035	0.596144	0.100448	6.57398	4.89875e-11	4.19884e-09
ITSN2	31.894	25.7789	38.0091	0.542711	0.102091	6.55145	5.69796e-11	4.86758e-09
ANTXR1	45.241	38.5253	51.9567	0.422038	0.090352	6.54371	6.00109e-11	5.1095e-09
MUC1	15.3362	10.6039	20.0684	0.860474	0.246991	6.53891	6.19706e-11	5.25888e-09
ASS1	254.962	211.488	298.435	0.494864	0.0865139	6.53397	6.40486e-11	5.41729e-09
RAB3IP	75.0083	50.4226	99.594	0.96807	0.102632	6.52148	6.96156e-11	5.86878e-09
RXRA	42.9926	52.8606	33.1246	-0.658417	0.0881932	-6.49684	8.20256e-11	6.8923e-09
LRRC8A	85.1468	71.8134	98.4802	0.450206	0.0818814	6.48561	8.8376e-11	7.40163e-09
MAP3K8	33.1862	23.5253	42.8471	0.838209	0.161142	6.45966	1.04941e-10	8.76032e-09
KRT14	1236.9	1425.4	1048.4	-0.442818	0.0715477	-6.45069	1.11339e-10	9.26429e-09
ERAP1	80.3949	71.0182	89.7716	0.33388	0.0852554	6.43928	1.20044e-10	9.95625e-09
IL23A	7.06546	2.09948	12.0314	2.0719	0.410194	6.43318	1.24963e-10	1.03308e-08
GATA6	10.836	7.2649	14.4071	0.898526	0.163338	6.43231	1.25679e-10	1.03566e-08
IDI1	103.334	84.9096	121.759	0.514938	0.0949352	6.42894	1.28497e-10	1.05549e-08
SEMA3A	89.4543	72.1664	106.742	0.558329	0.0850771	6.42576	1.31209e-10	1.07432e-08
UACA	64.3241	53.8586	74.7896	0.466282	0.0926567	6.41152	1.44076e-10	1.17591e-08
TINAGL1	146.517	120.697	172.337	0.510282	0.0924699	6.38346	1.73129e-10	1.40856e-08
TICAM1	12.522	8.03589	17.0082	0.994911	0.182508	6.38152	1.75338e-10	1.42201e-08
CDH3	288.743	243.648	333.837	0.452751	0.0746656	6.35861	2.03592e-10	1.64595e-08
IL1R2	4.53883	1.23838	7.83928	1.98147	0.430133	6.34101	2.28271e-10	1.83966e-08
TOM1L2	102.188	124.028	80.3482	-0.62007	0.0846113	-6.33945	2.30583e-10	1.85247e-08
CKAP4	120.294	101.823	138.764	0.442833	0.0813781	6.33694	2.34366e-10	1.87508e-08
EMP1	505.73	446.666	564.793	0.33785	0.0783788	6.33662	2.34861e-10	1.87508e-08
HIST1H2BE	388.026	490.226	285.825	-0.776212	0.112053	-6.33503	2.37289e-10	1.88858e-08
FAM102B	6.10507	8.20522	4.00492	-0.879104	0.174693	-6.32987	2.45371e-10	1.94687e-08
PHLDB2	204.065	177.377	230.752	0.377651	0.0781923	6.32	2.61555e-10	2.06887e-08
HIVEP1	23.0262	18.5724	27.4799	0.541126	0.115548	6.28755	3.22515e-10	2.5432e-08
COL12A1	30.7195	24.6411	36.798	0.55985	0.0860804	6.25714	3.92113e-10	3.08253e-08
EGFR	225.25	200.351	250.149	0.318834	0.0705398	6.23763	4.44248e-10	3.48171e-08
HYOU1	94.5135	78.7464	110.281	0.48071	0.0859122	6.2271	4.75141e-10	3.71247e-08
MXD1	19.7996	14.2943	25.305	0.782336	0.129177	6.22352	4.86136e-10	3.78684e-08
SIX4	15.3095	11.7714	18.8475	0.636044	0.124641	6.21664	5.07902e-10	3.9444e-08
RNF19B	38.7633	29.8836	47.6429	0.655387	0.117236	6.20522	5.46204e-10	4.22904e-08
MDK	146.268	184.498	108.038	-0.766569	0.11553	-6.19813	5.7139e-10	4.41071e-08
PPP1R18	29.0982	22.0615	36.135	0.687291	0.122416	6.19657	5.77075e-10	4.44123e-08
CSF1	7.16032	3.93498	10.3857	1.2061	0.233404	6.18527	6.19952e-10	4.75195e-08
SPAG9	116.347	97.6116	135.083	0.464657	0.0767777	6.18497	6.21157e-10	4.75195e-08
NT5C2	183.154	158.344	207.965	0.391121	0.0811968	6.18441	6.23343e-10	4.75448e-08
LAMB3	206.902	177.254	236.55	0.414304	0.0826681	6.17753	6.51133e-10	4.95171e-08
HIST1H4B	734.749	908.345	561.153	-0.693865	0.104066	-6.17068	6.79951e-10	5.15555e-08
PRRG1	21.4285	15.865	26.992	0.730987	0.123389	6.15709	7.4094e-10	5.60142e-08
FOXD1	25.6839	17.7116	33.6561	0.889178	0.177951	6.1527	7.61748e-10	5.74179e-08
OGFRL1	6.86853	4.63922	9.09784	0.840479	0.151688	6.14966	7.76499e-10	5.83581e-08
NEFL	239.093	278.243	199.942	-0.474741	0.070897	-6.12797	8.90065e-10	6.66976e-08
HSD17B2	9.71263	3.46341	15.9619	1.92608	0.196261	6.11936	9.39499e-10	7.01967e-08
ASAP2	55.3865	45.1309	65.642	0.530701	0.0849581	6.09571	1.08955e-09	8.11713e-08
KRT80	41.6874	50.9314	32.4435	-0.63488	0.0974128	-6.07538	1.23694e-09	9.18852e-08
CDH2	42.2028	34.538	49.8676	0.517385	0.0985261	6.06848	1.29129e-09	9.56452e-08
NOTCH3	3.60415	4.71652	2.49179	-0.711172	0.236673	-6.0673	1.3008e-09	9.60721e-08
FNDC3B	47.7049	40.3712	55.0387	0.437798	0.0896792	6.04605	1.48437e-09	1.09315e-07
SFN	669.817	571.017	768.616	0.428082	0.0808271	6.03732	1.56692e-09	1.15063e-07
NECAP2	31.3957	22.474	40.3174	0.815686	0.152388	6.03518	1.58785e-09	1.16028e-07
AQP3	26.8989	35.5748	18.2231	-0.928015	0.153029	-6.03505	1.58912e-09	1.16028e-07
EFHD2	63.322	51.3725	75.2715	0.542334	0.10161	6.03341	1.6054e-09	1.16884e-07
GALNT5	124.831	107.892	141.769	0.390785	0.0719992	6.02985	1.64113e-09	1.19147e-07
SMURF2	62.7006	52.05	73.3512	0.487004	0.0973878	6.0202	1.74199e-09	1.25916e-07
MX1	32.4744	26.5428	38.4061	0.516742	0.161344	6.02	1.74419e-09	1.25916e-07
DAPP1	25.6466	18.8353	32.4579	0.754277	0.141983	6.01681	1.77889e-09	1.28038e-07
SLC31A2	39.7853	29.2466	50.324	0.762859	0.145617	6.01638	1.78358e-09	1.28038e-07
S100A9	10.7061	2.41106	19.0012	2.55179	0.505567	6.01274	1.82417e-09	1.30586e-07
NAMPTP1	8.8131	5.3204	12.3058	1.07397	0.210111	6.01076	1.84656e-09	1.31821e-07
DUSP5	6.14002	3.00923	9.27081	1.35715	0.276501	6.01	1.85521e-09	1.3207e-07
RASSF3	35.7122	29.033	42.3913	0.530857	0.107395	6.00806	1.87757e-09	1.33292e-07
UBD	12.5905	0.087729	25.0933	4.58429	1.45143	6.00289	1.93836e-09	1.37227e-07
IRAK2	1.01849	0.200474	1.83651	1.24051	0.544186	5.99327	2.05662e-09	1.45198e-07
KIAA0040	57.5974	48.9851	66.2096	0.427169	0.095021	5.98999	2.09855e-09	1.47752e-07
KIF3C	15.4026	10.0355	20.7698	0.980176	0.145982	5.98857	2.11689e-09	1.48559e-07
GRAMD2B	53.192	41.2876	65.0965	0.644338	0.112332	5.98821	2.1216e-09	1.48559e-07
GATAD2B	7.6659	10.0928	5.23904	-0.830221	0.15859	-5.9858	2.1533e-09	1.50367e-07
ENC1	34.7183	28.5201	40.9166	0.505827	0.110422	5.98489	2.16534e-09	1.50797e-07
SNX10	22.9201	16.1706	29.6696	0.836867	0.158068	5.96917	2.3847e-09	1.65623e-07
CNTNAP1	6.92566	5.21107	8.64025	0.634229	0.213535	5.96301	2.47633e-09	1.71523e-07
HIST1H1D	637.552	764.811	510.293	-0.58284	0.0879491	-5.9518	2.65206e-09	1.832e-07
PPFIBP2	10.4453	15.046	5.84455	-1.22919	0.250242	-5.94368	2.78686e-09	1.91994e-07
ATP2B1	32.007	25.0656	38.9485	0.615999	0.110946	5.92379	3.14611e-09	2.16162e-07
TKT	209.375	247.59	171.16	-0.530025	0.0799378	-5.91744	3.26988e-09	2.24065e-07
LAMA5	45.9618	56.2492	35.6743	-0.642484	0.0920134	-5.90937	3.4341e-09	2.34691e-07
A2ML1	3.44847	2.1368	4.76014	0.876807	0.312904	5.90445	3.53815e-09	2.41159e-07
ESM1	1.47411	0.152219	2.796	1.72007	0.792003	5.89508	3.74497e-09	2.54578e-07
CCNL1	116.46	96.1792	136.741	0.503239	0.0927639	5.89249	3.80412e-09	2.57915e-07
SLC2A6	7.89667	4.31009	11.4832	1.23318	0.245193	5.88211	4.05065e-09	2.73905e-07
FAM129A	109.398	97.1277	121.668	0.322027	0.0725764	5.88042	4.0923e-09	2.75993e-07
IGFN1	0.572074	0.246996	0.897153	0.60538	0.447201	5.87225	4.29913e-09	2.89182e-07
PRNP	255.191	220.754	289.629	0.390219	0.0766587	5.86897	4.385e-09	2.94185e-07
NEBL	8.92234	11.873	5.97167	-0.884773	0.218328	-5.86314	4.54204e-09	3.03925e-07
TAB3	36.6424	30.4106	42.8742	0.48212	0.0876542	5.86139	4.59015e-09	3.06344e-07
GCH1	12.1403	8.07853	16.2021	0.922055	0.172689	5.85075	4.89349e-09	3.25741e-07
AIDA	100.415	86.6705	114.159	0.393465	0.0834304	5.84758	4.98765e-09	3.31149e-07
TMCC3	43.4564	32.5495	54.3633	0.72264	0.102039	5.84484	5.07058e-09	3.35785e-07
SESN3	2.99355	4.15294	1.83416	-0.862473	0.209859	-5.83857	5.26514e-09	3.47771e-07
HIVEP2	9.26139	9.03103	9.49175	0.0647856	0.140913	5.83112	5.50564e-09	3.62721e-07
INPP4B	68.6093	59.1239	78.0946	0.395641	0.0897678	5.81971	5.89482e-09	3.87365e-07
SOX4	7.34711	5.29603	9.39819	0.723817	0.15258	5.80584	6.40437e-09	4.19773e-07
CXCL6	6.71804	3.40048	10.0356	1.32643	0.300326	5.8033	6.5023e-09	4.25104e-07
NFKBIZ	48.9539	31.9852	65.9225	1.02067	0.131741	5.80057	6.60881e-09	4.30968e-07
CANX	239.106	209.274	268.938	0.360361	0.0838824	5.79151	6.97578e-09	4.53745e-07
CAB39	86.0128	73.7202	98.3053	0.410371	0.0838578	5.7908	7.005e-09	4.54491e-07
BTG3	38.0151	27.2313	48.7988	0.818813	0.155484	5.78802	7.12206e-09	4.6092e-07
JUN	10.2308	6.90151	13.5601	0.88182	0.179113	5.78166	7.39655e-09	4.77478e-07
RAPH1	17.4486	14.3129	20.5843	0.495235	0.108606	5.77651	7.62648e-09	4.89325e-07
KLHL5	20.4327	15.1491	25.7163	0.726266	0.146168	5.77637	7.63272e-09	4.89325e-07
TMBIM1	135.983	116.7	155.266	0.408896	0.0901597	5.77627	7.63735e-09	4.89325e-07
EPN3	29.6332	38.1679	21.0983	-0.825735	0.137546	-5.76494	8.16885e-09	5.22073e-07
SAMD9L	17.5845	13.7771	21.3919	0.599611	0.124992	5.75171	8.83429e-09	5.63197e-07
IRF1	62.9946	47.6133	78.376	0.707353	0.112429	5.74812	9.02396e-09	5.73861e-07
RPS17	1709.24	2021.84	1396.63	-0.533395	0.0825502	-5.74358	9.26972e-09	5.8803e-07
ISY1-RAB43	9.20114	6.63682	11.7654	0.7412	0.154352	5.74028	9.45181e-09	5.98101e-07
FRMD4B	53.9945	47.5583	60.4306	0.339242	0.103018	5.73315	9.85811e-09	6.22275e-07
LYST	27.7444	23.9202	31.5686	0.386163	0.0953072	5.73037	1.00213e-08	6.31021e-07
MLKL	41.7323	33.5114	49.9532	0.562098	0.116233	5.72888	1.01098e-08	6.35036e-07
TNFAIP1	46.643	38.3646	54.9215	0.506505	0.10024	5.72552	1.03116e-08	6.46128e-07
NUAK2	8.19475	5.47286	10.9167	0.880505	0.184806	5.72205	1.05245e-08	6.57855e-07
PKM	1634.47	1399.38	1869.57	0.417661	0.0706775	5.72023	1.06379e-08	6.63327e-07
IL6	4.58554	0.780799	8.39028	2.39864	0.597381	5.71875	1.0731e-08	6.67508e-07
PDCD1LG2	2.78314	1.04669	4.51959	1.43127	0.380299	5.70321	1.17573e-08	7.29581e-07
LFNG	7.67154	11.4063	3.93673	-1.32945	0.262221	-5.69466	1.2362e-08	7.65251e-07
CALR	438.654	379.709	497.599	0.38919	0.0797011	5.69071	1.26514e-08	7.81278e-07
TPM4	473.775	412.017	535.533	0.377467	0.0693761	5.67354	1.39876e-08	8.61716e-07
CASP4	192.69	158.483	226.898	0.514978	0.092291	5.66375	1.48104e-08	9.10217e-07
LYRM1	67.2939	52.8687	81.7191	0.618773	0.121642	5.66242	1.49256e-08	9.15102e-07
SFT2D2	95.0309	110.193	79.8688	-0.459412	0.0696842	-5.64941	1.61003e-08	9.84768e-07
GPC1	37.0468	43.8133	30.2803	-0.518673	0.116418	-5.6426	1.67504e-08	1.02209e-06
EREG	14.724	11.4598	17.9881	0.607815	0.145082	5.63366	1.76423e-08	1.07396e-06
RBBP8	159.423	140.871	177.975	0.335173	0.0818538	5.61106	2.01094e-08	1.22124e-06
ANKLE2	89.6718	75.7776	103.566	0.445656	0.0837713	5.60618	2.06842e-08	1.25318e-06
MMP10	4.13775	1.49661	6.77888	1.63959	0.435527	5.6051	2.08131e-08	1.25801e-06
HIST1H4D	843.627	1045.92	641.335	-0.704755	0.119913	-5.6037	2.09826e-08	1.26528e-06
SPRR2A	10.4087	2.91345	17.9039	2.27217	0.46937	5.59764	2.17289e-08	1.3072e-06
PFN1	627.344	552.088	702.6	0.347245	0.0729715	5.59691	2.18204e-08	1.30963e-06
CYB5R1	64.4696	52.563	76.3762	0.530654	0.117647	5.59304	2.23131e-08	1.33607e-06
CARD6	9.60295	6.33354	12.8724	0.91963	0.189767	5.57311	2.50232e-08	1.49486e-06
TMEM123	278.259	227.443	329.075	0.53096	0.0803747	5.57243	2.51207e-08	1.49719e-06
KRR1	102.025	80.4625	123.587	0.612939	0.0930847	5.5693	2.55759e-08	1.52078e-06
BNIP3L	38.0287	28.8457	47.2118	0.691862	0.12564	5.56717	2.58916e-08	1.536e-06
SAT1	103.471	81.0047	125.936	0.630328	0.123039	5.5609	2.68385e-08	1.58849e-06
SMAD3	84.2779	72.7186	95.8372	0.393533	0.0906901	5.5585	2.72099e-08	1.6046e-06
ELF3	38.4539	28.4737	48.434	0.746077	0.132081	5.55834	2.72359e-08	1.6046e-06
PTPRE	11.2041	8.54476	13.8634	0.638979	0.168483	5.55503	2.77565e-08	1.63152e-06
NDRG1	47.735	35.9584	59.5116	0.711309	0.114771	5.55455	2.78335e-08	1.6323e-06
UGCG	85.1381	71.6208	98.6555	0.456567	0.0915312	5.55378	2.79563e-08	1.63576e-06
SLC8B1	30.7379	23.3026	38.1731	0.688748	0.136079	5.55281	2.81118e-08	1.63888e-06
PMEPA1	25.6587	21.0618	30.2556	0.502567	0.122037	5.55265	2.81375e-08	1.63888e-06
CTSC	153.292	125.859	180.726	0.518545	0.0865899	5.55194	2.82516e-08	1.6413e-06
XDH	17.2749	12.9461	21.6037	0.696692	0.13782	5.5516	2.83071e-08	1.6413e-06
ANXA8L1	370.35	321.873	418.827	0.378828	0.0771426	5.54699	2.90637e-08	1.68137e-06
N4BP3	2.86827	1.73859	3.99795	0.867899	0.227166	5.54581	2.92595e-08	1.68888e-06
WASHC4	60.0089	49.2878	70.73	0.512367	0.0950063	5.5378	3.06298e-08	1.764e-06
PNPLA8	23.5425	16.6201	30.465	0.836524	0.137539	5.52547	3.28601e-08	1.88455e-06
WNT4	5.32287	2.50316	8.14257	1.38394	0.282416	5.52542	3.28701e-08	1.88455e-06
ITPR2	19.1334	15.9344	22.3324	0.462375	0.0984087	5.52236	3.34477e-08	1.91339e-06
AC116533.1	1445.43	1173.22	1717.64	0.549569	0.107086	5.50732	3.64347e-08	2.07962e-06
PLEK2	48.3682	33.9605	62.7759	0.867288	0.165092	5.50657	3.65899e-08	2.08383e-06
SPRR1A	23.7427	2.42139	45.0641	3.75099	0.792035	5.50577	3.67554e-08	2.08862e-06
WWC1	60.906	48.1024	73.7097	0.605503	0.103193	5.50386	3.71562e-08	2.10673e-06
HR	36.0366	43.4076	28.6655	-0.58202	0.105887	-5.50284	3.73718e-08	2.11427e-06
BMP7	10.5407	14.2165	6.86481	-0.952157	0.190349	-5.49351	3.94017e-08	2.2242e-06
CALU	192.801	167.182	218.419	0.383668	0.0768247	5.48892	4.04408e-08	2.27784e-06
PARP14	40.6679	34.4643	46.8715	0.432798	0.0823038	5.48685	4.09155e-08	2.29952e-06
HIST1H1B	1100.94	1281.2	920.676	-0.476296	0.074931	-5.48158	4.2155e-08	2.364e-06
ZC3H12A	12.2623	8.22793	16.2966	0.90641	0.196394	5.47801	4.30147e-08	2.40694e-06
MYH9	196.393	178.47	214.315	0.262702	0.0701856	5.47206	4.44829e-08	2.48368e-06
CAVIN3	77.0182	59.5939	94.4424	0.655457	0.127382	5.4585	4.80165e-08	2.67514e-06
VEZT	114.89	99.5002	130.28	0.385444	0.0925645	5.44554	5.16483e-08	2.87124e-06
CDV3	276.285	241.289	311.281	0.366118	0.0738464	5.439	5.35812e-08	2.97225e-06
BCAT1	23.3358	27.4332	19.2384	-0.490482	0.104113	-5.43303	5.54055e-08	3.06681e-06
FP565260.3	4.44114	2.57659	6.3057	1.03044	0.26498	5.43002	5.63469e-08	3.11219e-06
CEP170	44.211	38.5896	49.8323	0.360622	0.126759	5.42805	5.69725e-08	3.13998e-06
HIST1H2BN	133.501	162.549	104.454	-0.633109	0.11334	-5.4232	5.8543e-08	3.21961e-06
MAST4	38.3621	33.0622	43.662	0.390874	0.0988305	5.42228	5.88425e-08	3.22915e-06
GABARAPL1	57.4449	45.4899	69.4	0.598658	0.120827	5.41679	6.06789e-08	3.32282e-06
SNX9	23.4691	19.0111	27.9272	0.531627	0.113516	5.41298	6.19834e-08	3.38702e-06
TMEM63C	4.12802	6.13861	2.11741	-1.19529	0.35699	-5.40274	6.56293e-08	3.57861e-06
ADGRF1	55.2752	45.6529	64.8975	0.498254	0.0964882	5.39598	6.81499e-08	3.70817e-06
GALNT3	127.333	107.965	146.701	0.43881	0.0869103	5.38788	7.12951e-08	3.8629e-06
MSN	197.007	174	220.014	0.336786	0.074121	5.38237	7.35109e-08	3.97455e-06
HIST2H2BE	223.815	261.801	185.829	-0.492252	0.0808852	-5.38082	7.41454e-08	4.00042e-06
SH3TC2	14.5778	10.2405	18.9152	0.825159	0.156095	5.37098	7.83116e-08	4.21632e-06
TMEM87B	50.3036	40.0325	60.5747	0.585571	0.104532	5.36366	8.15503e-08	4.38024e-06
MDC1	0.950514	1.55476	0.346274	-0.924213	0.406668	-5.36334	8.1698e-08	4.38024e-06
TPT1	3507.45	3118.93	3895.97	0.320837	0.069576	5.35397	8.60465e-08	4.60376e-06
RARG	68.5105	82.4479	54.5731	-0.586488	0.108589	-5.34949	8.82039e-08	4.70936e-06
BDNF	4.70911	6.63331	2.78492	-1.01204	0.223988	-5.34732	8.9266e-08	4.75615e-06
AFDN	67.0498	57.2604	76.8391	0.417979	0.0891002	5.34378	9.10295e-08	4.84005e-06
RIMKLB	42.1635	32.7334	51.5936	0.640707	0.112224	5.34035	9.27649e-08	4.92211e-06
NEDD4	97.8115	91.0927	104.53	0.196501	0.0886418	5.33721	9.43874e-08	4.99785e-06
SMURF1	36.1561	30.3915	41.9207	0.451298	0.0966046	5.32252	1.02337e-07	5.40762e-06
CRYBG2	6.12641	8.81555	3.43727	-1.1454	0.220052	-5.32202	1.02621e-07	5.41144e-06
MAP2K3	53.8257	42.7149	64.9365	0.592952	0.122288	5.31985	1.03853e-07	5.46519e-06
ABR	36.3099	26.8676	45.7522	0.746448	0.113347	5.31489	1.06719e-07	5.60231e-06
HIST1H2BI	702.797	855.393	550.201	-0.635696	0.109816	-5.31459	1.06896e-07	5.60231e-06
APOBEC3B	52.1714	40.9887	63.3541	0.616031	0.12737	5.31215	1.08341e-07	5.66643e-06
SLC41A1	48.617	38.9659	58.2681	0.568488	0.101213	5.30606	1.1202e-07	5.84692e-06
IKZF2	15.8578	20.0617	11.6539	-0.735043	0.124275	-5.29115	1.21549e-07	6.3314e-06
RRBP1	114.434	97.8021	131.065	0.418634	0.079078	5.28739	1.24074e-07	6.44983e-06
PEA15	335.065	292.787	377.344	0.364926	0.0758562	5.26819	1.37778e-07	7.1333e-06
TRIM27	7.57648	5.17059	9.98236	0.831707	0.354125	5.26579	1.39589e-07	7.21247e-06
FOXN1	2.51816	4.15125	0.885061	-1.45031	0.374201	-5.26529	1.3997e-07	7.21763e-06
TARSL2	20.0823	15.4443	24.7203	0.645317	0.156412	5.26451	1.40564e-07	7.23367e-06
C15orf48	9.00302	2.76993	15.2361	2.10659	0.450313	5.24347	1.57585e-07	8.09338e-06
TYMP	7.90559	4.31899	11.4922	1.2318	0.270833	5.23663	1.63536e-07	8.38223e-06
TMEM200A	3.35615	1.77116	4.94114	1.10025	0.300534	5.23343	1.66395e-07	8.51174e-06
ZNF114	23.7014	18.347	29.0558	0.63553	0.163327	5.2314	1.68235e-07	8.5887e-06
RNASE7	4.90792	1.82822	7.98763	1.66805	0.403322	5.22996	1.6955e-07	8.63862e-06
SLC12A2	49.1882	41.4685	56.9079	0.447368	0.0862969	5.22691	1.72371e-07	8.76493e-06
DHRS3	53.0101	66.1642	39.856	-0.717143	0.124234	-5.22584	1.73367e-07	8.7981e-06
ADAMTS6	7.50592	5.71308	9.29875	0.617423	0.204544	5.22341	1.75658e-07	8.89677e-06
IFI16	228.951	202.071	255.83	0.338826	0.0804246	5.22265	1.76385e-07	8.91594e-06
RHBDL2	20.7479	14.022	27.4737	0.922556	0.186306	5.2201	1.78828e-07	9.02164e-06
RICTOR	32.6701	28.3887	36.9515	0.368897	0.0905217	5.21884	1.80043e-07	9.06511e-06
ZNF267	30.9945	25.0091	36.9798	0.546216	0.126519	5.21419	1.84627e-07	9.27767e-06
KIF20A	72.8453	86.2938	59.3969	-0.531403	0.0902387	-5.1928	2.07156e-07	1.03894e-05
ADGRF4	12.5797	9.29495	15.8644	0.712043	0.160709	5.1893	2.1109e-07	1.0566e-05
LDHA	1984.82	1748.98	2220.66	0.344296	0.0721367	5.18792	2.12654e-07	1.06236e-05
SERPINB10	3.42698	1.14588	5.70808	1.64433	0.450269	5.18417	2.16979e-07	1.08185e-05
SNAP23	74.0943	52.9707	95.2178	0.834127	0.113381	5.17125	2.32531e-07	1.15714e-05
CXorf49B	7.17256	1.38141	12.9637	2.55179	0.609275	5.17009	2.33976e-07	1.16208e-05
HIF1A	98.7752	84.5335	113.017	0.414687	0.0872961	5.16914	2.35175e-07	1.16578e-05
MEGF9	19.4241	23.4413	15.4069	-0.575015	0.104809	-5.16864	2.35806e-07	1.16665e-05
TDRD7	25.7889	21.5078	30.0699	0.465093	0.119125	5.16688	2.38036e-07	1.17541e-05
ITGA1	7.55697	5.79068	9.32325	0.60427	0.167795	5.16568	2.39561e-07	1.18067e-05
ALDH3A2	113.835	132.237	95.433	-0.466391	0.0877556	-5.1589	2.48398e-07	1.22187e-05
CASK	54.1415	65.2096	43.0734	-0.587132	0.095359	-5.15696	2.50992e-07	1.23226e-05
BCAR3	61.5337	52.9312	70.1363	0.399466	0.106013	5.15303	2.56309e-07	1.25596e-05
EPB41L5	24.903	18.4886	31.3174	0.729684	0.137341	5.15248	2.5707e-07	1.25729e-05
KLK13	10.0315	15.2676	4.79543	-1.48901	0.340509	-5.1519	2.5786e-07	1.25875e-05
PDIA3	404.881	362.671	447.091	0.301156	0.0714325	5.15081	2.59358e-07	1.26365e-05
KLK7	18.3831	24.4247	12.3415	-0.93031	0.176975	-5.13873	2.76603e-07	1.34512e-05
TAP1	19.9596	14.4672	25.4521	0.77417	0.171904	5.13794	2.77763e-07	1.3482e-05
DUSP4	12.0497	9.54398	14.5554	0.560995	0.131762	5.13469	2.82602e-07	1.3691e-05
GJB3	49.0729	39.6026	58.5433	0.552366	0.1221	5.13289	2.85333e-07	1.37972e-05
PITPNM3	8.33305	10.2063	6.45979	-0.587104	0.145061	-5.13149	2.87461e-07	1.38739e-05
RECQL	72.5085	62.5613	82.4557	0.392861	0.0952641	5.12603	2.95909e-07	1.42548e-05
ANKRD11	117.468	107.138	127.798	0.252243	0.0790419	5.11977	3.05911e-07	1.4709e-05
HIST1H4J	1289.81	1520.76	1058.86	-0.521858	0.0931889	-5.11576	3.1248e-07	1.49967e-05
PTAFR	10.9363	8.10004	13.7725	0.698968	0.162918	5.11058	3.21171e-07	1.5385e-05
MYH16	5.11782	4.18327	6.05237	0.444246	0.249678	5.10974	3.22604e-07	1.54248e-05
ADAMTS1	32.1879	25.6952	38.6807	0.57186	0.116738	5.10625	3.28616e-07	1.5683e-05
ZMIZ1	23.612	28.1005	19.1236	-0.532156	0.0954288	-5.10447	3.3173e-07	1.58022e-05
BTG1	24.0617	18.9458	29.1776	0.597395	0.116916	5.10124	3.37437e-07	1.60442e-05
KRT1	3.50246	5.55391	1.451	-1.41898	0.350926	-5.09671	3.45614e-07	1.64026e-05
MYL12A	196.999	161.995	232.002	0.515515	0.104304	5.09348	3.51551e-07	1.66535e-05
GPR176	2.69064	1.38241	3.99886	1.06917	0.311597	5.09248	3.53412e-07	1.67108e-05
LIMA1	248.36	222.631	274.089	0.298775	0.0708663	5.0877	3.62423e-07	1.71053e-05
EFNA1	60.0576	47.256	72.8591	0.614068	0.132985	5.08465	3.68302e-07	1.73508e-05
MYO1E	279.614	238.438	320.79	0.42647	0.0778823	5.08163	3.74215e-07	1.7597e-05
CHRM3	5.19595	6.89222	3.49966	-0.810614	0.219951	-5.07724	3.82954e-07	1.7975e-05
CMTM6	71.7075	63.0806	80.3344	0.343977	0.0866165	5.07579	3.85894e-07	1.80799e-05
ALPPL2	1.48432	2.59006	0.378588	-1.38082	0.528916	-5.07289	3.91812e-07	1.83236e-05
SLFN11	54.3805	46.3023	62.4588	0.423911	0.0949609	5.07199	3.93684e-07	1.83704e-05
SLC41A2	21.6792	15.8593	27.4992	0.757374	0.17334	5.07172	3.94245e-07	1.83704e-05
HSP90B1	485.259	442.885	527.633	0.252079	0.0699703	5.07137	3.94968e-07	1.83707e-05
HIST1H2BH	103.974	122.998	84.9506	-0.528737	0.093619	-5.06709	4.03939e-07	1.87539e-05
PHGDH	75.5397	89.6875	61.3918	-0.539546	0.118936	-5.06038	4.1843e-07	1.93751e-05
HIST2H4A	1805.65	2101.52	1509.79	-0.476821	0.0807699	-5.05968	4.19961e-07	1.93751e-05
SERPINE1	22.5747	17.6545	27.495	0.611189	0.137424	5.05965	4.20026e-07	1.93751e-05
ID4	6.98578	9.95519	4.01637	-1.1269	0.248627	-5.05951	4.20343e-07	1.93751e-05
NET1	298.542	264.736	332.349	0.327038	0.0711735	5.05401	4.32634e-07	1.99058e-05
MSI2	43.5233	51.3578	35.6888	-0.513065	0.11562	-5.05077	4.40042e-07	2.02104e-05
CTNNAL1	175.654	155.948	195.359	0.323211	0.0798008	5.04295	4.58415e-07	2.10165e-05
B4GALT1	42.8872	36.5275	49.2469	0.421083	0.096598	5.03935	4.67127e-07	2.13777e-05
PDE4DIP	70.7496	59.6532	81.846	0.449847	0.0882859	5.03528	4.77144e-07	2.17972e-05
DLX5	4.94879	7.9543	1.94328	-1.60516	0.390043	-5.03419	4.7988e-07	2.18342e-05
SNN	15.6288	19.7773	11.4802	-0.735365	0.143667	-5.03401	4.80321e-07	2.18342e-05
CCDC71L	11.8986	9.00399	14.7932	0.658727	0.178072	5.03394	4.8051e-07	2.18342e-05
STARD4	21.3035	17.0986	25.5084	0.550565	0.136573	5.02735	4.97294e-07	2.25569e-05
CLDN12	36.2916	31.4037	41.1793	0.380376	0.121719	5.02573	5.01519e-07	2.27084e-05
EXT2	76.6483	64.8808	88.4158	0.440673	0.100375	5.02468	5.0427e-07	2.27926e-05
WASHC2A	64.685	58.4825	70.8875	0.273276	0.0988627	5.02173	5.12093e-07	2.31055e-05
SYT14	18.5473	15.1137	21.9809	0.512151	0.115393	5.0169	5.25107e-07	2.3638e-05
STON2	51.575	62.0881	41.062	-0.58485	0.108968	-5.01667	5.25739e-07	2.3638e-05
SLC28A3	0.506991	0.076946	0.937036	0.846904	1.03776	5.01242	5.37504e-07	2.41246e-05
BCAM	54.619	65.7931	43.4449	-0.587681	0.0982063	-5.01201	5.38651e-07	2.41338e-05
ARHGEF2	86.3063	70.2311	102.381	0.537397	0.0946759	5.01058	5.42669e-07	2.42292e-05
CYP51A1	100.101	87.6889	112.514	0.356046	0.0858563	5.01058	5.42672e-07	2.42292e-05
MBOAT2	55.9029	43.9519	67.854	0.615158	0.103071	5.00593	5.55943e-07	2.47786e-05
GCLC	108.106	124.171	92.0415	-0.427954	0.088674	-5.00327	5.63647e-07	2.50461e-05
HIST2H2AA4	1056.12	1223.55	888.697	-0.460867	0.0791292	-5.00319	5.639e-07	2.50461e-05
TOB1	63.4526	53.7299	73.1753	0.438611	0.101785	5.00232	5.66447e-07	2.51157e-05
ZSWIM4	3.3965	1.93675	4.85626	0.995759	0.265771	4.99795	5.79432e-07	2.56471e-05
LENG1	3.24196	5.94925	0.534675	-2.17892	0.673876	-4.99746	5.80909e-07	2.56682e-05
PNPO	55.0165	63.5282	46.5048	-0.441859	0.098703	-4.98583	6.16954e-07	2.72139e-05
RAB11FIP1	37.1153	31.455	42.7756	0.431685	0.0924647	4.97865	6.40287e-07	2.81946e-05
HIST1H3G	50.5365	61.4159	39.6572	-0.618403	0.116192	-4.97646	6.47573e-07	2.84666e-05
CD55	18.9176	13.5115	24.3237	0.803292	0.188532	4.9708	6.66765e-07	2.926e-05
NOTCH1	15.8695	18.95	12.789	-0.532871	0.0989003	-4.96733	6.78796e-07	2.97371e-05
CD83	2.54283	1.05618	4.02948	1.29044	0.401569	4.9617	6.98783e-07	3.05604e-05
SH3BGRL3	115.967	99.585	132.349	0.406786	0.0965704	4.96086	7.01831e-07	3.06415e-05
GOLGA7B	2.34204	1.36868	3.31541	0.865417	0.260306	4.95813	7.11745e-07	3.10214e-05
FAT2	64.9564	74.1136	55.7992	-0.403203	0.0697442	-4.95597	7.19695e-07	3.13147e-05
RHOU	3.13435	4.506	1.7627	-0.994926	0.259956	-4.95455	7.24967e-07	3.14906e-05
FILIP1L	8.14087	5.39949	10.8823	0.89278	0.22774	4.94605	7.57347e-07	3.28414e-05
MVP	111.829	91.4809	132.178	0.526123	0.10083	4.94569	7.58727e-07	3.28457e-05
NEURL3	2.99261	0.968039	5.01718	1.61233	0.493053	4.94524	7.60485e-07	3.28663e-05
EMP2	61.7321	72.8638	50.6003	-0.517487	0.0847064	-4.94391	7.65729e-07	3.30372e-05
HIST1H4C	784.108	942.96	625.256	-0.591973	0.110232	-4.94028	7.801e-07	3.36007e-05
OSBPL7	15.2592	19.9692	10.5491	-0.860496	0.173331	-4.9341	8.0521e-07	3.4624e-05
HIST1H1E	801.597	924.451	678.744	-0.445164	0.0772648	-4.9274	8.33323e-07	3.57729e-05
TPM3	1043.99	923.705	1164.28	0.333606	0.0669569	4.92178	8.57622e-07	3.67544e-05
HDGF	509.839	454.09	565.589	0.316151	0.0701398	4.92006	8.65189e-07	3.70168e-05
RRAGC	46.4199	39.3113	53.5284	0.435825	0.109741	4.91965	8.67001e-07	3.70325e-05
CCND2	108.175	95.2023	121.147	0.344481	0.0800686	4.91606	8.83013e-07	3.76537e-05
STAP2	64.5228	49.4464	79.5991	0.676011	0.139217	4.90912	9.14881e-07	3.89478e-05
SPRR2E	3.82247	0.482003	7.16293	2.46154	0.807085	4.90252	9.46147e-07	4.0212e-05
LRCH2	0.576905	1.02315	0.130657	-0.839445	0.595782	-4.90199	9.48689e-07	4.02533e-05
DAG1	74.3062	85.5348	63.0776	-0.433459	0.0809346	-4.90064	9.55245e-07	4.04645e-05
BTG2	32.8358	26.9855	38.6861	0.503956	0.118657	4.89461	9.85032e-07	4.16574e-05
MCL1	226.98	201.473	252.486	0.324177	0.0760434	4.89403	9.87907e-07	4.17102e-05
TEAD1	82.8739	74.441	91.3069	0.291091	0.0765104	4.89267	9.94791e-07	4.19317e-05
SLC9A9	11.64	8.58723	14.6928	0.710911	0.238308	4.88832	1.01699e-06	4.2797e-05
HIST2H2BF	339.817	391.961	287.673	-0.444952	0.0858133	-4.88527	1.03288e-06	4.33947e-05
SCD	568.657	644.221	493.094	-0.385007	0.0674469	-4.88398	1.03963e-06	4.36068e-05
CHST15	35.9905	30.4787	41.5024	0.433168	0.101934	4.87931	1.06457e-06	4.45796e-05
FLG	9.61872	11.5566	7.68084	-0.532538	0.113739	-4.8781	1.07115e-06	4.47821e-05
HIST1H4E	220.165	256.173	184.157	-0.473987	0.0855622	-4.87539	1.08594e-06	4.53264e-05
LRG1	2.09196	0.685552	3.49837	1.41618	0.447393	4.86469	1.14638e-06	4.77714e-05
MYH15	1.24989	0.542058	1.95772	0.939628	0.376624	4.86281	1.15729e-06	4.81477e-05
LRRC8C	11.9798	10.0161	13.9436	0.439918	0.119335	4.86205	1.16178e-06	4.82561e-05
AMOT	4.84337	3.25671	6.43002	0.803627	0.200809	4.85971	1.17556e-06	4.87495e-05
FGF5	1.63968	0.879559	2.39981	0.855058	0.361586	4.85629	1.19603e-06	4.95184e-05
AC106886.5	10.7888	9.17522	12.4024	0.397436	0.101762	4.85463	1.20612e-06	4.98557e-05
KLF11	6.76028	4.67987	8.8407	0.792904	0.199965	4.8517	1.22408e-06	5.05165e-05
NABP1	60.7825	48.8783	72.6868	0.562995	0.103158	4.84972	1.23637e-06	5.09418e-05
PAPPA	1.50715	0.833694	2.18061	0.794553	0.268487	4.84858	1.24349e-06	5.11527e-05
PIEZO1	60.0132	49.6467	70.3798	0.495048	0.0885066	4.84764	1.24938e-06	5.13126e-05
ANKRD33B	14.4736	12.2819	16.6654	0.411466	0.104439	4.84673	1.25515e-06	5.14671e-05
NANOS1	5.71149	8.54514	2.87784	-1.29951	0.263009	-4.84436	1.27021e-06	5.20014e-05
AC270285.2	125.772	106.889	144.655	0.433006	0.102949	4.83865	1.30722e-06	5.34312e-05
PIK3IP1	6.44206	3.91011	8.97402	1.02242	0.264493	4.83617	1.32367e-06	5.40175e-05
PDIA6	176.365	156.494	196.237	0.324638	0.0818729	4.83486	1.33237e-06	5.42862e-05
F2RL1	38.6937	32.539	44.8484	0.45103	0.108175	4.83332	1.34276e-06	5.46225e-05
SCRN1	92.2136	83.2489	101.178	0.278357	0.0805096	4.82615	1.39195e-06	5.6534e-05
ITGAV	70.81	47.125	94.4951	0.988639	0.217722	4.8229	1.41487e-06	5.7374e-05
IRF9	30.076	17.8475	42.3045	1.20015	0.222684	4.82239	1.41852e-06	5.74308e-05
SH3BP4	35.0942	31.9504	38.238	0.251956	0.101516	4.81722	1.45574e-06	5.88448e-05
HIST1H4I	76.8822	94.3371	59.4273	-0.657835	0.127247	-4.81035	1.50664e-06	6.07334e-05
SLC29A3	15.5906	20.1366	11.0445	-0.811377	0.175654	-4.81028	1.5072e-06	6.07334e-05
ZNF251	4.31927	3.19914	5.4394	0.616834	0.594761	4.80347	1.55936e-06	6.27369e-05
TXNDC9	83.249	69.9303	96.5677	0.460002	0.110628	4.80088	1.57972e-06	6.34561e-05
HIST1H4A	197.216	263.228	131.204	-0.999018	0.200683	-4.79982	1.58807e-06	6.36918e-05
TMPRSS11E	3.14588	4.97523	1.31655	-1.36702	0.387617	-4.79105	1.65914e-06	6.64383e-05
CCDC82	25.1465	17.7974	32.4956	0.833438	0.127553	4.78356	1.72217e-06	6.88545e-05
PNP	83.3542	69.0417	97.6668	0.494352	0.112506	4.77852	1.76592e-06	7.04937e-05
CMAS	82.4491	69.7749	95.1232	0.441648	0.103498	4.77559	1.79182e-06	7.14164e-05
CDCP1	40.9205	36.3593	45.4817	0.315193	0.0921229	4.77413	1.80488e-06	7.18178e-05
FAT3	2.89811	3.83857	1.95765	-0.710125	0.191337	-4.77384	1.8075e-06	7.18178e-05
SLC9A3R1	96.6238	110.977	82.2711	-0.427308	0.099338	-4.77305	1.8146e-06	7.19885e-05
FN1	20.4932	16.3518	24.6347	0.56301	0.1166	4.76997	1.84255e-06	7.29845e-05
RASA2	18.0426	15.3095	20.7756	0.417003	0.135754	4.75885	1.94701e-06	7.70029e-05
BID	54.876	45.2061	64.5459	0.504421	0.124386	4.75209	2.01323e-06	7.94993e-05
ABCC5	50.6384	58.511	42.7658	-0.443352	0.0930502	-4.75151	2.01899e-06	7.9604e-05
DKK1	388.239	344.817	431.661	0.323227	0.0886231	4.74702	2.06434e-06	8.1267e-05
HOXC12	10.468	13.5077	7.42839	-0.78349	0.169317	-4.74341	2.10151e-06	8.26036e-05
LTBP3	18.599	23.4071	13.791	-0.722581	0.157822	-4.74265	2.10944e-06	8.27883e-05
MSANTD3-TMEFF1	4.84139	2.67182	7.01096	1.12548	0.307331	4.74105	2.12612e-06	8.33139e-05
GSN	61.7199	72.8807	50.5592	-0.518965	0.0997912	-4.74075	2.12933e-06	8.33139e-05
NECAB1	1.022	0.482091	1.56191	0.789583	0.590816	4.73021	2.24284e-06	8.7621e-05
CSTA	238.594	202.468	274.72	0.438402	0.106577	4.72607	2.28909e-06	8.9292e-05
CYR61	34.4693	27.3171	41.6216	0.589911	0.134812	4.71814	2.38013e-06	9.27022e-05
KCNK1	66.0506	58.4772	73.624	0.327303	0.109793	4.70903	2.489e-06	9.67951e-05
PXDN	10.024	7.04685	13.0012	0.79905	0.157233	4.70304	2.56321e-06	9.95304e-05
BOD1L1	18.7511	16.4746	21.0276	0.334053	0.0993861	4.70184	2.57823e-06	9.99619e-05
LSR	98.1136	83.2297	112.998	0.4366	0.0974285	4.70121	2.58628e-06	0.000100123
IL4R	73.2151	61.7605	84.6697	0.448928	0.109982	4.69746	2.63418e-06	0.000101769
HUWE1	175.947	155.74	196.155	0.330957	0.0685942	4.69726	2.63676e-06	0.000101769
NPC1	92.3551	86.0416	98.6686	0.195434	0.0889291	4.69658	2.64548e-06	0.000101953
MAFF	9.07643	6.14875	12.0041	0.863204	0.213873	4.69554	2.65907e-06	0.000102322
ANKRD12	27.7162	23.7098	31.7225	0.405199	0.119393	4.69468	2.67025e-06	0.000102599
NIPAL1	15.1215	12.5838	17.6593	0.458013	0.132697	4.69381	2.68165e-06	0.000102882
HS3ST1	4.87084	3.8529	5.88878	0.505401	0.19303	4.69345	2.68635e-06	0.000102908
GOLGB1	28.8238	25.7605	31.8869	0.297407	0.0990852	4.69269	2.69641e-06	0.000102986
GNL1	3.72792	1.66867	5.78717	1.34669	0.647963	4.69139	2.71351e-06	0.000103485
ARRDC3	27.3503	35.4796	19.221	-0.851234	0.149743	-4.6903	2.72798e-06	0.000103882
FGFR3	4.31942	6.13277	2.50606	-1.02461	0.251729	-4.68904	2.74489e-06	0.000104371
WARS	154.215	132.927	175.503	0.398246	0.0954585	4.68822	2.75586e-06	0.000104633
ANXA8	535.213	481.544	588.882	0.289766	0.0740884	4.68749	2.76581e-06	0.000104855
SERPINE2	20.4322	14.7395	26.1249	0.785224	0.162108	4.68405	2.81257e-06	0.000106471
ERMP1	28.3697	33.6029	23.1365	-0.519676	0.102474	-4.67218	2.98022e-06	0.00011265
HMGN2	585.142	675.58	494.704	-0.448781	0.0849211	-4.67159	2.98877e-06	0.000112807
ANO1	194.942	175.025	214.858	0.294306	0.0785006	4.66884	3.02904e-06	0.000114159
SAMD11	2.19389	3.82555	0.562222	-1.62709	0.54271	-4.66766	3.04648e-06	0.000114648
CCDC85B	14.9561	10.2988	19.6134	0.867403	0.212247	4.66712	3.05455e-06	0.000114783
PTPRZ1	9.36338	11.744	6.98276	-0.674859	0.176594	-4.66384	3.10366e-06	0.000116458
NRAS	35.5836	30.6879	40.4793	0.38846	0.0986044	4.65949	3.16994e-06	0.000118771
C12orf29	58.2664	45.2195	71.3133	0.645761	0.122571	4.65917	3.17483e-06	0.00011878
SLC25A24	86.5212	76.1395	96.903	0.343883	0.0856098	4.65187	3.28935e-06	0.000122886
CLU	117.327	135.744	98.9093	-0.452787	0.111212	-4.64399	3.41738e-06	0.000127483
IRF2	36.8961	32.2981	41.4941	0.351827	0.137134	4.64186	3.45281e-06	0.000128617
ITGA6	449.241	412.964	485.519	0.232994	0.0707072	4.64037	3.4778e-06	0.00012936
WBP2	53.756	43.8276	63.6844	0.529029	0.116746	4.63971	3.48899e-06	0.000129588
HIST1H2BD	678.384	805.332	551.435	-0.545569	0.0978536	-4.63835	3.51207e-06	0.000130257
GSDME	41.8661	34.5385	49.1938	0.498125	0.124048	4.63783	3.52092e-06	0.000130396
BCL2L1	77.3041	65.9828	88.6255	0.420118	0.101791	4.63249	3.61289e-06	0.000133609
PITPNB	112.927	100.513	125.341	0.315661	0.0872939	4.6287	3.67961e-06	0.00013588
SLC6A8	19.0741	22.789	15.3591	-0.5402	0.140251	-4.62496	3.74663e-06	0.000138156
SOD2	187.928	100.889	274.966	1.43749	0.253833	4.61774	3.87934e-06	0.000142844
CDC42BPG	8.31615	10.3236	6.30874	-0.631635	0.162721	-4.61477	3.93531e-06	0.000144698
DNAJC3	34.3999	29.8712	38.9286	0.371165	0.0914786	4.60748	4.07583e-06	0.00014965
RNF213	152.895	137.909	167.881	0.281872	0.0699682	4.60312	4.16209e-06	0.000152598
KLF4	20.7678	15.8155	25.7202	0.668143	0.162943	4.59165	4.39763e-06	0.000161003
GLB1L2	19.267	24.1679	14.366	-0.711843	0.136349	-4.58739	4.48831e-06	0.000164089
FLII	230.641	202.356	258.926	0.354093	0.0798427	4.58365	4.56938e-06	0.000166653
SAMD9	91.0187	82.4313	99.6063	0.27006	0.0739724	4.58327	4.57767e-06	0.000166653
GSR	99.6682	113.827	85.5095	-0.408532	0.0854787	-4.58325	4.57796e-06	0.000166653
LPIN1	34.1742	28.425	39.9234	0.475884	0.110116	4.57994	4.65116e-06	0.000169078
BCR	86.5585	75.2197	97.8972	0.375766	0.0914397	4.57927	4.66602e-06	0.000169378
HIST2H3D	90.6568	124.823	56.4911	-1.12998	0.238499	-4.5769	4.71909e-06	0.000171062
PTTG1IP	96.459	84.6539	108.264	0.351226	0.0913092	4.56856	4.91079e-06	0.00017776
TLR2	4.21887	2.57372	5.86401	0.941625	0.323084	4.56642	4.96121e-06	0.000179331
CTSD	289.861	326.389	253.333	-0.364292	0.0802143	-4.56592	4.97309e-06	0.000179508
VNN1	1.87379	0.840023	2.90755	1.08654	0.406235	4.56554	4.98206e-06	0.000179579
IFNAR1	24.9731	22.1018	27.8442	0.320275	0.10179	4.56421	5.01384e-06	0.00018047
MTUS2	7.57151	10.797	4.34603	-1.14188	0.229683	-4.56356	5.02926e-06	0.000180771
IFNAR2	24.092	18.1676	30.0164	0.694364	0.158053	4.56285	5.04645e-06	0.000181135
PTPRK	102.601	89.9574	115.245	0.3539	0.0800051	4.56213	5.06385e-06	0.000181336
BTBD10	73.5463	62.8721	84.2204	0.416014	0.102098	4.5618	5.07163e-06	0.000181336
RNF152	38.5438	36.0881	40.9995	0.179416	0.0884205	4.56173	5.07327e-06	0.000181336
HIST1H2AI	497.064	590.259	403.87	-0.546333	0.108396	-4.56041	5.10541e-06	0.00018223
ITGB1P1	59.9507	43.0735	76.8279	0.820378	0.198041	4.55998	5.11587e-06	0.00018235
AL356234.1	0.805643	0.026782	1.58451	1.33176	1.31656	4.55923	5.13425e-06	0.000182751
DNAJC10	81.1104	70.8649	91.356	0.361918	0.0851339	4.55732	5.18109e-06	0.000184162
TP53I11	6.84936	9.91266	3.78606	-1.18909	0.269201	-4.55558	5.22424e-06	0.000185439
SH3RF2	41.0591	35.9964	46.1218	0.34901	0.108412	4.54442	5.50854e-06	0.00019526
FRMD6	97.9966	87.2344	108.759	0.314925	0.0897854	4.54177	5.5783e-06	0.00019746
AP1S3	92.374	109.227	75.5216	-0.526532	0.115096	-4.53945	5.64003e-06	0.000199369
EPHA4	4.11135	5.75734	2.46535	-0.963458	0.356351	-4.52856	5.93873e-06	0.000209639
STAT2	48.7472	42.0419	55.4526	0.391297	0.108622	4.52638	6.00018e-06	0.000211517
GABRP	130.792	106.698	154.886	0.533489	0.139552	4.52293	6.09881e-06	0.000214698
PSTPIP2	47.1643	41.186	53.1426	0.36	0.10664	4.5191	6.21028e-06	0.000218322
XBP1	52.7516	44.2458	61.2573	0.460458	0.119289	4.51468	6.34115e-06	0.000222096
SPINK5	30.1367	37.854	22.4195	-0.730353	0.152596	-4.51464	6.34239e-06	0.000222096
SLCO3A1	85.7994	73.4613	98.1376	0.41294	0.0898526	4.5146	6.34361e-06	0.000222096
ASAP3	17.9723	22.133	13.8117	-0.643215	0.185151	-4.51097	6.45326e-06	0.000225626
AGPS	70.262	78.068	62.456	-0.317338	0.0850859	-4.5105	6.4676e-06	0.00022582
SMIM11B	6.9406	2.15051	11.7307	2.01465	0.408621	4.50984	6.48755e-06	0.000226208
SVIL	185.75	178.718	192.782	0.108704	0.0744281	4.50954	6.49697e-06	0.000226229
SLMAP	52.3317	45.618	59.0453	0.365163	0.0950832	4.50783	6.54933e-06	0.000227742
LGALS8	188.669	175.213	202.126	0.205055	0.0787906	4.50497	6.63814e-06	0.000230518
PML	45.4607	40.7325	50.1889	0.294658	0.106163	4.50458	6.65048e-06	0.000230634
CDK17	41.1485	36.8824	45.4146	0.293049	0.118509	4.49532	6.94668e-06	0.00024058
HECW2	1.68172	2.38655	0.976892	-0.776585	0.331608	-4.49031	7.11201e-06	0.000245731
NAIP	0.798687	1.28543	0.311945	-0.800759	0.458175	-4.49023	7.11459e-06	0.000245731
IL13RA2	2.80197	0.904698	4.69925	1.58121	0.581361	4.48564	7.26939e-06	0.00025074
RAB6A	112.835	100.332	125.337	0.318187	0.082571	4.48226	7.38553e-06	0.000254404
MT1X	206.138	258.238	154.038	-0.741648	0.144519	-4.48003	7.4633e-06	0.000256738
RGS20	43.4257	34.8488	52.0027	0.56414	0.154077	4.47943	7.48432e-06	0.000257116
MSC	2.00347	0.470747	3.5362	1.62493	0.694146	4.47699	7.57041e-06	0.000259725
B4GALT6	16.8589	12.8222	20.8956	0.663659	0.170016	4.47207	7.74661e-06	0.000265415
PTHLH	165.825	191.314	140.337	-0.444321	0.0921071	-4.46621	7.96162e-06	0.000272417
ITGA4	31.0293	38.1187	23.9399	-0.649401	0.109722	-4.46446	8.02723e-06	0.000274296
PDLIM1	351.577	402.357	300.796	-0.418484	0.0795101	-4.45782	8.2796e-06	0.000282211
HIST1H2BM	505.843	607.069	404.616	-0.584122	0.11872	-4.45779	8.28089e-06	0.000282211
NUP153	40.1986	35.5726	44.8246	0.325358	0.0875827	4.45248	8.48855e-06	0.000288904
STK10	43.7621	33.6283	53.8959	0.664743	0.105297	4.45056	8.56473e-06	0.00029111
CMTM3	14.1822	11.3557	17.0087	0.543521	0.217456	4.44879	8.63574e-06	0.000293135
ARHGAP25	7.08849	4.4838	9.69318	0.963444	0.271603	4.44753	8.68643e-06	0.000294465
FAM84B	85.6469	75.6191	95.6746	0.335433	0.0893467	4.44135	8.93957e-06	0.000302647
SERPINB7	323.418	283.843	362.994	0.353748	0.081542	4.43919	9.02999e-06	0.000305304
P4HA1	35.7492	30.0966	41.4019	0.44737	0.120727	4.433	9.29316e-06	0.000313788
BAZ1A	56.704	50.1217	63.2863	0.330576	0.0853552	4.43191	9.34041e-06	0.000314968
NEURL1B	2.02028	2.84876	1.19182	-0.812266	0.264794	-4.43151	9.35769e-06	0.000315136
PRDM8	4.00094	2.02778	5.9741	1.20375	0.339468	4.42451	9.66612e-06	0.000325096
FSD1L	6.46873	5.02896	7.90849	0.563272	0.217458	4.42322	9.72388e-06	0.00032661
TMEM173	16.0955	12.0148	20.1762	0.702291	0.186673	4.41691	1.0012e-05	0.000335847
HIST1H2AM	584.656	694.696	474.616	-0.548658	0.113067	-4.4125	1.02183e-05	0.000342321
BDKRB2	10.0867	8.05185	12.1216	0.535659	0.148512	4.4122	1.02327e-05	0.000342354
FAM3C2	62.056	46.3963	77.7156	0.731878	0.182706	4.40457	1.05993e-05	0.000354159
EPHB3	11.879	14.9036	8.85431	-0.690527	0.162385	-4.40156	1.07475e-05	0.000358642
AMOTL2	68.8804	61.1245	76.6364	0.321572	0.0952381	4.39886	1.08821e-05	0.00036266
TARS	330.551	291.726	369.377	0.339444	0.0773274	4.39491	1.10817e-05	0.000368835
FAS	23.2427	18.0922	28.3933	0.622508	0.160147	4.39055	1.13064e-05	0.000375824
ARHGEF3	39.5514	34.7584	44.3445	0.342647	0.105133	4.38959	1.13564e-05	0.000376996
C10orf55	1.7505	0.722465	2.77853	1.13335	0.460685	4.37811	1.19714e-05	0.0003969
HIST1H1C	1623.6	1837.81	1409.4	-0.382664	0.0726168	-4.37722	1.20204e-05	0.000398009
NUB1	131.088	113.198	148.978	0.393218	0.0949358	4.37127	1.23526e-05	0.000408481
TAX1BP1	171.924	156.065	187.782	0.265359	0.0784563	4.37008	1.242e-05	0.000410179
AC241556.4	15.9247	18.7606	13.0887	-0.488092	0.105175	-4.36734	1.25769e-05	0.000414828
TBC1D2	67.3926	58.6822	76.103	0.369486	0.0993058	4.36675	1.26107e-05	0.000415406
GADD45B	23.9933	18.1176	29.869	0.691255	0.189444	4.36497	1.27137e-05	0.000418264
INAFM2	39.4445	31.9674	46.9216	0.539635	0.125295	4.36232	1.28688e-05	0.000422639
ARF4	144.443	126.814	162.071	0.351453	0.0946671	4.36214	1.28797e-05	0.000422639
NUMB	60.1982	53.4804	66.9159	0.318012	0.103886	4.35806	1.31218e-05	0.000430032
ERBIN	97.6702	85.9249	109.415	0.345102	0.0806931	4.35752	1.31544e-05	0.00043055
HEPHL1	1.15484	0.58088	1.7288	0.787539	0.374881	4.3541	1.33614e-05	0.000436768
SLC43A3	145.049	132.077	158.021	0.256956	0.0842131	4.35069	1.35709e-05	0.000443051
DIEXF	21.8634	18.6467	25.0801	0.408665	0.0963657	4.34752	1.37688e-05	0.000448941
STAT6	110.743	99.3492	122.136	0.295229	0.0857227	4.34691	1.3807e-05	0.000449614
COTL1	340.824	306.988	374.659	0.286545	0.0800379	4.34293	1.40598e-05	0.000457263
SPRY4	4.75096	3.33286	6.16904	0.72646	0.238522	4.34222	1.41049e-05	0.00045815
TRIM47	37.4535	29.9627	44.9443	0.569355	0.148872	4.33756	1.44073e-05	0.00046738
E2F2	16.4801	20.3905	12.5697	-0.656578	0.134154	-4.33698	1.44455e-05	0.000467584
KLK6	2.95889	4.72164	1.19615	-1.38145	0.487835	-4.33691	1.44501e-05	0.000467584
ATP6V1B1	1.61826	2.75305	0.483482	-1.33907	0.748353	-4.32813	1.50382e-05	0.000486001
TAF4B	9.85034	7.93253	11.7682	0.51541	0.152523	4.32756	1.50769e-05	0.000486638
PPFIBP1	102.283	94.6502	109.915	0.213621	0.0825123	4.32138	1.5506e-05	0.000499858
ACTR3	202.14	183.561	220.719	0.264635	0.0762628	4.31882	1.56865e-05	0.000505041
BHLHE40	26.1562	21.0069	31.3056	0.553826	0.144034	4.31756	1.57764e-05	0.0005073
CPEB2	6.25742	4.61111	7.90374	0.666126	0.203955	4.31309	1.60988e-05	0.000517016
PDIA4	140.633	126.854	154.413	0.28161	0.0791186	4.31209	1.61719e-05	0.000518714
ATP2B4	43.4312	39.4764	47.386	0.257507	0.0847189	4.30843	1.6442e-05	0.000526567
C1S	5.94768	4.84573	7.04964	0.46154	0.363355	4.30821	1.64578e-05	0.000526567
CYSTM1	31.142	24.3987	37.8852	0.614462	0.172667	4.30764	1.65007e-05	0.000527282
CEBPB	20.9106	15.9872	25.8339	0.659609	0.17294	4.30639	1.65942e-05	0.00052961
PATL1	50.3446	44.3873	56.3019	0.336296	0.0916065	4.30483	1.67113e-05	0.000532683
RAB27B	35.4913	33.2058	37.7767	0.180951	0.0892044	4.30415	1.67625e-05	0.000533651
MYLK	15.478	20.1902	10.7657	-0.848814	0.131964	-4.29767	1.72606e-05	0.000548827
CLIC4	50.9648	44.9835	56.946	0.333593	0.0915422	4.29124	1.77681e-05	0.000564265
SBDS	182.775	163.151	202.399	0.309285	0.0852765	4.28677	1.81288e-05	0.000574814
SP100	58.3717	49.8817	66.8618	0.415453	0.111594	4.28657	1.81452e-05	0.000574814
HMGA1	139.007	124.398	153.615	0.30216	0.0859084	4.28416	1.83431e-05	0.000580365
TRIM6	5.69507	7.91711	3.47303	-0.995323	0.241435	-4.28143	1.85695e-05	0.000586804
SYDE2	8.04316	10.0826	6.00366	-0.662122	0.1714	-4.27731	1.89162e-05	0.000597024
TRIB1	17.9433	14.5596	21.327	0.520977	0.142654	4.27311	1.92767e-05	0.000607653
CCBE1	7.69364	5.24753	10.1397	0.83436	0.177901	4.27087	1.94708e-05	0.000613019
TANK	67.9379	59.1915	76.6843	0.368063	0.137738	4.26549	1.99465e-05	0.000627226
SETBP1	8.44578	6.85901	10.0326	0.489347	0.132418	4.26197	2.02629e-05	0.000636395
SBNO2	2.84981	1.85619	3.84344	0.761942	0.366917	4.25733	2.06882e-05	0.000648955
ATP2C1	148.445	130.358	166.532	0.350933	0.0790699	4.25462	2.09401e-05	0.000656056
NINJ1	15.3259	10.1909	20.461	0.939385	0.22726	4.25105	2.12768e-05	0.000665789
SLC39A1	154.805	137.441	172.168	0.322905	0.0885747	4.25066	2.13145e-05	0.000666156
FAM136A	80.8765	70.3047	91.4483	0.374649	0.101346	4.24972	2.14038e-05	0.000668132
SWAP70	60.2064	54.1491	66.2638	0.286491	0.0857211	4.24774	2.1594e-05	0.000673248
ACP6	30.3534	36.6065	24.1004	-0.583272	0.138129	-4.24705	2.16604e-05	0.0006745
MAP7D1	86.2889	76.5637	96.014	0.322811	0.0907866	4.24262	2.20922e-05	0.000686616
GRIP1	70.0455	92.4381	47.6529	-0.941484	0.124595	-4.24251	2.21031e-05	0.000686616
MKL2	42.8633	48.8741	36.8524	-0.397904	0.093998	-4.24051	2.23016e-05	0.000691942
DLX3	8.40205	10.9408	5.86331	-0.798924	0.218582	-4.23653	2.26998e-05	0.000703446
RAB43	4.62877	3.02878	6.22875	0.843404	0.315587	4.23062	2.33051e-05	0.00071979
RAC1	514.51	461.476	567.545	0.297898	0.0711957	4.23058	2.3309e-05	0.00071979
OASL	5.64915	3.89116	7.40714	0.781438	0.244352	4.23056	2.33114e-05	0.00071979
LOX	1.76744	0.884425	2.65046	0.953952	0.405928	4.22852	2.3523e-05	0.000725448
TPST1	19.4538	15.1768	23.7309	0.612388	0.205962	4.22108	2.43139e-05	0.000748938
ATF5	16.6171	12.5573	20.677	0.677087	0.181839	4.21984	2.44473e-05	0.000752144
GNA15	28.9573	23.5758	34.3387	0.524013	0.142529	4.21798	2.465e-05	0.00075747
SLC44A3-AS1	34.6168	26.4533	42.7805	0.67331	0.170468	4.21273	2.52308e-05	0.000773468
KTN1	227.873	214.108	241.637	0.173732	0.0705901	4.21272	2.5231e-05	0.000773468
HSD11B1	2.17575	0.582503	3.769	1.59148	0.654044	4.20862	2.56939e-05	0.000786718
MFHAS1	19.9452	16.6567	23.2338	0.456802	0.114275	4.20778	2.57888e-05	0.00078868
RAB8B	17.3935	13.9628	20.8242	0.544544	0.166723	4.20102	2.65712e-05	0.000811641
HIST1H2AL	367.856	444.725	290.986	-0.610255	0.134557	-4.19486	2.73036e-05	0.00083302
ATP8A1	3.57535	5.90196	1.24874	-1.61789	0.331581	-4.19202	2.76479e-05	0.000842521
ATP5MC3	241.436	284.038	198.835	-0.512342	0.0980903	-4.18933	2.79773e-05	0.000851548
RAB7A	255.935	225.802	286.069	0.339967	0.0757746	4.18352	2.87031e-05	0.000872602
CERS6	16.5576	19.395	13.7203	-0.47041	0.104655	-4.18206	2.88883e-05	0.000877191
NRG4	25.6889	34.7916	16.5863	-1.02517	0.22961	-4.17823	2.93785e-05	0.000890552
HIST2H2AB	659.637	772.753	546.521	-0.498957	0.106529	-4.17808	2.93978e-05	0.000890552
BCAP29	88.0791	74.5191	101.639	0.442665	0.107317	4.17699	2.95391e-05	0.000893777
RNF6	60.4709	52.901	68.0407	0.357134	0.0943972	4.17579	2.96949e-05	0.000897429
HIST1H2AH	411.239	494.735	327.744	-0.592603	0.131145	-4.17253	3.01229e-05	0.000909294
CALM1	436.954	396.093	477.814	0.269988	0.0726368	4.16302	3.14068e-05	0.000946934
EEF1A2	64.5941	72.0199	57.1682	-0.32806	0.120856	-4.16126	3.16503e-05	0.000953155
TNFRSF21	70.2444	62.6959	77.7929	0.306865	0.0892026	4.16082	3.17106e-05	0.000953848
CXXC5	42.8016	49.786	35.8172	-0.464051	0.133148	-4.1566	3.23013e-05	0.000970479
SPTLC2	34.7466	30.7509	38.7424	0.32388	0.0921105	4.15515	3.2508e-05	0.000975544
ECE1	22.0454	18.7976	25.2933	0.409371	0.122109	4.15351	3.27408e-05	0.000981382
NLRP1	4.26098	3.0837	5.43827	0.656797	0.216214	4.15035	3.31962e-05	0.000993869
GJB4	3.49559	2.07525	4.91592	0.9439	0.311951	4.14531	3.39351e-05	0.0010148
CREB1	55.484	49.1283	61.8396	0.32605	0.106282	4.1424	3.4369e-05	0.00102658
ARL6IP5	67.5126	59.4019	75.6233	0.343188	0.103549	4.13938	3.48241e-05	0.00103897
PPIB	470.656	428.227	513.085	0.260266	0.0784568	4.13865	3.49359e-05	0.00104109
RBMS1	57.4026	51.993	62.8122	0.268032	0.100895	4.13575	3.53805e-05	0.00105311
KRT6A	710.857	791.901	629.812	-0.329929	0.0727639	-4.13498	3.54992e-05	0.00105542
HIST1H3H	64.3584	78.0161	50.7007	-0.611965	0.137904	-4.13143	3.60519e-05	0.00107061
NMU	229.719	270.014	189.424	-0.509146	0.110971	-4.12811	3.65755e-05	0.0010849
NBN	42.8639	35.479	50.2488	0.490453	0.105602	4.11787	3.82384e-05	0.00113292
HLA-C	91.6072	76.0144	107.2	0.4905	0.131102	4.11665	3.84427e-05	0.00113725
DNTTIP2	77.9327	69.6703	86.1951	0.303144	0.0918895	4.11646	3.84732e-05	0.00113725
ITGBL1	52.3985	46.0505	58.7465	0.344643	0.0984871	4.11595	3.85591e-05	0.00113847
MBOAT7	21.6041	26.117	17.0911	-0.58392	0.164389	-4.1137	3.89375e-05	0.00114832
CDH11	2.85517	1.4207	4.28965	1.12775	0.448252	4.11252	3.91365e-05	0.00115286
BZW1P2	89.1199	73.7803	104.46	0.495958	0.138074	4.11095	3.94039e-05	0.00115941
CCND1	331.179	305.157	357.201	0.226498	0.0738601	4.10958	3.96384e-05	0.00116497
SULF2	61.2219	54.7861	67.6578	0.29952	0.0976911	4.10829	3.98597e-05	0.00117013
FAM114A1	22.8394	17.6697	28.0091	0.635811	0.156106	4.10777	3.99492e-05	0.00117142
DOCK4	3.38915	2.28942	4.48888	0.738679	0.299146	4.1069	4.00996e-05	0.00117448
SMIM11A	14.2688	20.6091	7.92843	-1.27516	0.30464	-4.10311	4.07637e-05	0.00119257
MAZ	104.406	114.081	94.7319	-0.265577	0.0979387	-4.10212	4.09376e-05	0.00119629
PHLPP1	25.4157	29.5384	21.293	-0.454031	0.111288	-4.10145	4.10565e-05	0.00119708
N4BP1	78.073	68.075	88.0709	0.366792	0.0900881	4.10144	4.1058e-05	0.00119708
RAC2	25.8116	20.0071	31.616	0.634699	0.172465	4.09611	4.20145e-05	0.00122358
PTP4A1	84.3335	74.4246	94.2424	0.336567	0.105485	4.09567	4.20944e-05	0.00122451
BAHCC1	5.66479	4.8773	6.45228	0.342527	0.163805	4.09456	4.22975e-05	0.00122903
ZBTB1	36.0534	32.0329	40.0739	0.31432	0.111341	4.09271	4.26353e-05	0.00123744
FAM49A	11.3555	14.6615	8.04953	-0.791303	0.177566	-4.0905	4.30443e-05	0.0012479
WDR34	47.0276	56.3366	37.7186	-0.566433	0.12573	-4.08841	4.34343e-05	0.00125778
TMED7	72.0746	64.5392	79.6099	0.298598	0.0891526	4.08341	4.43798e-05	0.00128371
CEBPA	2.48875	3.74703	1.23046	-1.08968	0.383858	-4.07945	4.51431e-05	0.00130431
CNN3	86.1374	71.8311	100.444	0.478053	0.109341	4.07818	4.53906e-05	0.00130999
FBXL3	35.8732	31.42	40.3263	0.350176	0.106439	4.07552	4.59123e-05	0.00132355
KIAA1522	41.6172	48.4812	34.7533	-0.468806	0.0929944	-4.0721	4.65913e-05	0.00134162
P3H2	139.727	122.108	157.347	0.363165	0.0908559	4.06777	4.74651e-05	0.00136525
CAPZA1	200.416	184.605	216.226	0.226961	0.0783998	4.05784	4.95284e-05	0.001423
GANC	45.386	38.2446	52.5275	0.447785	0.118977	4.05517	5.00972e-05	0.00143773
TRPM7	55.4649	49.565	61.3648	0.302593	0.0864455	4.05456	5.02295e-05	0.00143991
THSD4	18.1832	16.6771	19.6893	0.227007	0.109113	4.05284	5.06e-05	0.00144891
DUSP9	4.93174	7.0152	2.84829	-1.05852	0.298604	-4.05195	5.07931e-05	0.00145282
OGT	85.1863	74.763	95.6095	0.350672	0.0783367	4.05017	5.118e-05	0.00146225
KRT7	1137.27	1280.89	993.648	-0.366015	0.0795404	-4.04931	5.1369e-05	0.00146602
WASHC2C	43.6602	34.8499	52.4705	0.576772	0.0991083	4.04882	5.14766e-05	0.00146745
SDC1	97.8791	111.805	83.9527	-0.409107	0.091081	-4.04733	5.18043e-05	0.00147515
ABCA1	2.22454	1.57536	2.87373	0.588954	0.218214	4.04645	5.20012e-05	0.00147912
TMEM52B	8.40095	4.13504	12.6669	1.41223	0.380419	4.0433	5.27049e-05	0.00149715
HIST4H4	412.339	482.409	342.269	-0.493903	0.104525	-4.04309	5.2752e-05	0.00149715
HSPA1A	79.9698	91.3399	68.5998	-0.407871	0.0917287	-4.03887	5.37104e-05	0.00152267
TOP2A	177.889	197.075	158.704	-0.310646	0.0717687	-4.03634	5.42926e-05	0.00153747
HSPD1P11	9.45814	13.2564	5.65982	-1.09806	0.283567	-4.03581	5.44148e-05	0.00153923
GOLT1B	55.0111	42.6705	67.3517	0.646317	0.117901	4.03488	5.46298e-05	0.00154361
CDK6	44.6039	40.3784	48.8295	0.268122	0.0764744	4.03336	5.49861e-05	0.00155096
IGSF9	6.66476	8.67709	4.65242	-0.775705	0.20159	-4.03325	5.50111e-05	0.00155096
SPTLC3	39.4162	47.5848	31.2477	-0.591309	0.123908	-4.03291	5.50912e-05	0.00155151
TNF	0.657418	0.0430405	1.2718	1.12304	1.28235	4.03158	5.54035e-05	0.0015586
CCDC93	45.5641	41.3704	49.7578	0.260573	0.101983	4.0266	5.65893e-05	0.00159021
PROM2	39.1158	45.2617	32.97	-0.445556	0.099301	-4.02629	5.66637e-05	0.00159056
NCAPD2	106.431	120.389	92.4732	-0.377019	0.0760679	-4.02477	5.7031e-05	0.00159911
SELENOS	64.8958	53.7058	76.0858	0.494774	0.136617	4.02314	5.74279e-05	0.00160713
VSIR	19.5387	23.79	15.2873	-0.606003	0.140675	-4.02308	5.74423e-05	0.00160713
ADM	32.1683	26.2388	38.0977	0.521416	0.140382	4.02125	5.78893e-05	0.00161787
FZD6	44.0387	51.194	36.8834	-0.46232	0.0993044	-4.021	5.79525e-05	0.00161787
ITPR3	27.1622	24.4637	29.8607	0.277331	0.0862505	4.01364	5.97892e-05	0.00166733
YWHAZ	885.821	808.88	962.762	0.25097	0.067863	4.00365	6.2373e-05	0.00173749
SHMT1	57.4026	66.9174	47.8877	-0.474308	0.106554	-4.0008	6.31275e-05	0.0017566
TXNIP	41.0033	48.8145	33.1921	-0.542904	0.123847	-4.00009	6.3318e-05	0.00175999
RAET1L	10.4302	6.39825	14.462	1.06347	0.310738	3.98961	6.61816e-05	0.0018376
AMPD3	13.6502	9.83878	17.4616	0.768325	0.184289	3.98756	6.67564e-05	0.00185155
STEAP1	18.8687	13.8749	23.8624	0.741089	0.211734	3.98334	6.79537e-05	0.00188272
DTX4	24.8559	29.0393	20.6726	-0.470985	0.129106	-3.98284	6.80967e-05	0.00188465
BCL2L2-PABPN1	19.5845	14.4341	24.7349	0.737605	0.248893	3.97653	6.99293e-05	0.00193328
RPS29	823.451	983.377	663.525	-0.566887	0.11994	-3.97595	7.00975e-05	0.00193584
ID2	81.0025	94.9672	67.0378	-0.496206	0.122666	-3.97429	7.05904e-05	0.00194735
CD2AP	39.2584	36.1831	42.3338	0.220844	0.0945525	3.97287	7.10113e-05	0.00195625
SPECC1	68.811	61.8441	75.7779	0.288913	0.0938705	3.97269	7.10656e-05	0.00195625
HIST1H2AG	67.3684	78.2652	56.4716	-0.463838	0.103874	-3.97118	7.15164e-05	0.00196655
TPP1	66.8863	59.1292	74.6434	0.331147	0.0884595	3.96805	7.24633e-05	0.00199045
PIK3CD	2.56598	1.37433	3.75764	1.00273	0.314332	3.96768	7.25768e-05	0.00199143
CAPRIN2	39.0783	32.2558	45.9008	0.496008	0.122509	3.96738	7.26666e-05	0.00199176
GSTO1	169.398	145.671	193.125	0.404402	0.119509	3.96506	7.33785e-05	0.00200913
LIG4	9.25627	7.34529	11.1672	0.543969	0.165312	3.96342	7.38839e-05	0.00202081
PDE8A	39.8063	36.5386	43.074	0.231557	0.123329	3.96174	7.44048e-05	0.00203289
RBMS2	58.6198	54.4211	62.8184	0.203538	0.0883522	3.9575	7.57392e-05	0.00206714
CACNB1	7.57978	4.48983	10.6697	1.08794	0.320016	3.95303	7.71688e-05	0.00210392
CD63	499.416	445.486	553.346	0.312172	0.0865074	3.94975	7.82314e-05	0.00213062
DDX60	12.7553	10.7292	14.7814	0.428131	0.149349	3.94888	7.85166e-05	0.00213612
TCEAL8	66.5483	56.1852	76.9113	0.446192	0.127746	3.94664	7.92564e-05	0.00215396
FBP1	24.8364	31.2628	18.41	-0.733069	0.183715	-3.94545	7.96511e-05	0.00216239
SERPINB3	2.3742	0.987853	3.76054	1.25991	0.488763	3.94192	8.08334e-05	0.00219217
FKBP15	58.6195	53.5276	63.7114	0.247033	0.0865462	3.93856	8.19735e-05	0.00222074
SEPT5	3.61618	5.49991	1.73245	-1.25022	0.472279	-3.93688	8.25484e-05	0.00223395
AKAP12	4.15762	3.1852	5.13005	0.550604	0.178356	3.93643	8.27026e-05	0.00223576
GOLGA4	40.955	36.7709	45.1392	0.28872	0.0908321	3.92991	8.49772e-05	0.00229483
CYTH1	35.8531	28.3508	43.3553	0.595707	0.129452	3.92909	8.52679e-05	0.00230026
GALNT7	46.7315	52.9658	40.4972	-0.379031	0.0947063	-3.92802	8.56474e-05	0.00230807
PDGFB	4.89762	3.38638	6.40885	0.75622	0.286404	3.91982	8.86159e-05	0.00238555
HIST3H2BB	44.0468	52.2369	35.8566	-0.530504	0.124635	-3.91942	8.87641e-05	0.00238664
ECPAS	143.6	131.034	156.165	0.25137	0.0725053	3.9192	8.88426e-05	0.00238664
LRP10	21.3786	19.1349	23.6224	0.290277	0.1069	3.91495	9.04218e-05	0.00242652
TUBB6	73.3265	64.2832	82.3698	0.352813	0.114498	3.91131	9.1798e-05	0.00246088
TAF7	76.1869	68.12	84.2537	0.30266	0.0946775	3.91058	9.20737e-05	0.00246569
CAMK2N1	120.792	104.055	137.529	0.39905	0.090622	3.90976	9.23875e-05	0.00247151
AL031777.3	201.245	231.819	170.672	-0.439554	0.0995694	-3.90814	9.30092e-05	0.00248555
ABCC3	44.9667	39.1566	50.7767	0.366665	0.105639	3.90407	9.4588e-05	0.00252511
EEA1	38.1681	35.3732	40.9629	0.206239	0.087758	3.90345	9.48326e-05	0.002529
TFE3	21.3064	17.6261	24.9866	0.480438	0.133156	3.90271	9.51221e-05	0.00253409
FER	36.3346	31.318	41.3511	0.390063	0.101063	3.89961	9.63478e-05	0.00256407
MITD1	74.4872	62.4352	86.5392	0.464648	0.133023	3.89848	9.67966e-05	0.00257334
SGPL1	53.0832	46.6707	59.4958	0.343734	0.0932379	3.89638	9.76395e-05	0.00259261
TNFAIP8	46.1993	39.6181	52.7804	0.404956	0.119541	3.89618	9.77235e-05	0.00259261
PMM2	320.702	259.662	381.743	0.554196	0.0898979	3.89531	9.80738e-05	0.00259921
JAK1	41.3804	37.0859	45.675	0.293393	0.092931	3.89097	9.98451e-05	0.00264342
PAQR7	17.1267	20.6327	13.6206	-0.565203	0.138381	-3.89051	0.000100034	0.00264568
SIPA1L1	45.6416	42.0658	49.2174	0.221648	0.0990068	3.88876	0.000100759	0.00266212
PLS3	327.152	299.57	354.735	0.2431	0.0767284	3.88389	0.000102799	0.00271322
P2RY2	22.6405	27.2476	18.0333	-0.569599	0.139011	-3.88218	0.000103526	0.0027296
OSBPL8	62.7998	56.4194	69.1803	0.289526	0.0893939	3.88114	0.000103969	0.00273846
GDF6	0.588806	1.01841	0.159202	-0.800088	0.679375	-3.88078	0.000104122	0.00273968
CRIM1	73.0563	67.635	78.4776	0.211605	0.0824882	3.88022	0.000104364	0.00274323
CPA4	12.1974	15.3029	9.09193	-0.691926	0.240053	-3.87952	0.000104663	0.00274825
RASA4	15.4575	20.5162	10.3988	-0.916541	0.175703	-3.87545	0.000106428	0.00279174
KDSR	119.037	106.062	132.012	0.313109	0.0907067	3.87427	0.000106946	0.00280248
HIST1H4H	630.182	733.449	526.913	-0.476362	0.107784	-3.87301	0.000107499	0.00281409
ATF3	5.58192	2.99388	8.16995	1.19912	0.365538	3.87085	0.000108455	0.0028362
LPCAT3	53.0998	60.3158	45.8837	-0.387172	0.122565	-3.86862	0.000109455	0.00285944
ZNF318	11.2587	9.8833	12.6341	0.325098	0.116219	3.86641	0.000110449	0.00288248
UBASH3B	12.772	11.3191	14.2248	0.305526	0.125117	3.85751	0.000114546	0.00298331
FRRS1	24.9777	29.8676	20.0877	-0.549692	0.147767	-3.85664	0.000114957	0.00299097
ATRX	68.1834	64.8991	71.4677	0.13708	0.0880931	3.85576	0.000115369	0.00299867
FKBP1A	355.318	322.935	387.7	0.262955	0.0810788	3.8535	0.000116439	0.0030234
PFKP	197.892	173.962	221.822	0.348857	0.0813151	3.85225	0.000117038	0.00303589
CALM2	833.151	764.995	901.307	0.236282	0.071956	3.851	0.000117638	0.00304835
EIF5A2	13.8383	9.78805	17.8886	0.808082	0.175949	3.84523	0.000120441	0.00311784
SDC4	161.388	146.738	176.037	0.261005	0.0829692	3.84485	0.000120626	0.00311949
ANO6	75.0865	69.1059	81.067	0.227267	0.0802252	3.84408	0.000121005	0.00312612
NRP1	40.0006	35.3479	44.6533	0.328847	0.10407	3.84333	0.000121376	0.00313255
EFNB1	21.0325	17.8494	24.2156	0.419802	0.129163	3.84143	0.00012232	0.00315375
CTSL	115.618	100.427	130.809	0.377999	0.107535	3.84049	0.000122789	0.00316264
TPBG	16.7548	13.8867	19.6227	0.470208	0.14047	3.83734	0.000124377	0.00320033
OCLN	110.671	96.6299	124.712	0.364728	0.0848627	3.83573	0.000125194	0.00321812
ESPL1	15.4221	18.9046	11.9396	-0.621305	0.125159	-3.83466	0.000125737	0.00322885
ICOSLG	5.44337	4.44639	6.44035	0.450072	0.210356	3.83439	0.000125877	0.0032292
DUOX1	33.2256	34.8058	31.6455	-0.133307	0.138981	-3.82958	0.00012836	0.0032896
NAP1L1	655.029	599.524	710.534	0.24471	0.0698527	3.82315	0.000131758	0.00337331
IDH1	106.336	120.463	92.2085	-0.381989	0.0896311	-3.82166	0.000132558	0.00339043
WNT10A	34.9887	42.1519	27.8255	-0.582076	0.134359	-3.82093	0.000132952	0.00339709
SETX	46.9115	43.9374	49.8856	0.179344	0.0772547	3.82036	0.000133255	0.00340144
TMOD3	124.638	114.628	134.648	0.230377	0.0720324	3.81979	0.000133565	0.00340597
CHCHD10	129.29	165.695	92.8847	-0.828248	0.185453	-3.81749	0.000134817	0.00343448
IL20RA	3.23291	4.48346	1.98236	-0.87863	0.32785	-3.81602	0.000135624	0.00345162
SH2D5	3.72395	2.21259	5.23529	0.956719	0.330203	3.81284	0.000137381	0.00349286
ABCB6	11.6174	14.2377	8.99705	-0.60807	0.204473	-3.81061	0.000138623	0.00352094
MYO1C	95.0757	82.1834	107.968	0.389536	0.0859074	3.809	0.00013953	0.00354048
NUP210	11.6529	13.5249	9.78091	-0.43005	0.126787	-3.80872	0.000139686	0.00354092
KCTD11	10.8653	8.40943	13.3211	0.605963	0.187291	3.80845	0.000139839	0.00354131
DIS3	42.6173	37.3152	47.9194	0.352488	0.0920345	3.80642	0.000140994	0.00356703
TSPAN14	40.3187	47.2899	33.3474	-0.491522	0.0959743	-3.79824	0.000145728	0.00368316
SCARB1	21.2917	25.1247	17.4585	-0.501128	0.140439	-3.79734	0.000146256	0.00369285
LY6E	80.773	96.6374	64.9086	-0.566967	0.132594	-3.79696	0.000146482	0.00369493
JAG1	54.7317	64.4536	45.0097	-0.508536	0.0921231	-3.7962	0.000146931	0.0037026
ATP5MC2	152.986	181.381	124.59	-0.538244	0.128023	-3.79583	0.000147151	0.00370451
TCF20	30.6174	27.8975	33.3372	0.248827	0.0924115	3.7952	0.000147527	0.00371033
ABCA5	22.4317	20.0318	24.8316	0.296558	0.149902	3.79291	0.000148893	0.00374101
MARCH4	2.11076	1.33773	2.88379	0.732355	0.317344	3.79024	0.000150504	0.00377583
SKP2	49.1495	56.6773	41.6217	-0.436418	0.0998473	-3.79012	0.000150574	0.00377583
PPP1R12B	24.6678	28.5887	20.7469	-0.444237	0.123566	-3.78938	0.000151022	0.00378336
DUSP7	24.9277	21.495	28.3605	0.384272	0.121382	3.78619	0.000152977	0.0038286
CREG2	37.8376	42.2768	33.3984	-0.331254	0.135034	-3.78322	0.000154813	0.00387078
TGFB1	25.49	21.5542	29.4257	0.431891	0.138499	3.77829	0.000157912	0.00394441
FUT3	6.85347	4.58439	9.12255	0.858101	0.367656	3.77557	0.000159643	0.00398378
MPZL1	228.255	207.495	249.014	0.261999	0.0775865	3.77489	0.000160077	0.00399071
STAT5A	1.1972	0.5937	1.80069	0.813402	0.614325	3.77224	0.000161788	0.00402945
ETV3	36.0196	32.5862	39.453	0.268376	0.0962456	3.76987	0.000163332	0.00406395
ADCY7	29.0196	35.132	22.9073	-0.595829	0.11517	-3.76467	0.000166766	0.00414538
HIST1H4L	322.005	393.194	250.815	-0.646542	0.161182	-3.75898	0.000170604	0.00423667
HERC2P2	2.54929	0.263016	4.83556	2.208	0.746167	3.75797	0.000171297	0.00424977
ABCF1	7.60902	5.90295	9.31508	0.579471	0.240353	3.75697	0.000171984	0.00426268
FEZ2	71.3427	62.8137	79.8718	0.34177	0.116036	3.75588	0.000172734	0.00427713
ITCH	96.7534	88.8654	104.641	0.23334	0.0803091	3.75195	0.000175467	0.00434061
RASSF8	15.7227	12.9541	18.4914	0.482145	0.138857	3.74908	0.000177485	0.00438629
SPC25	16.0435	21.0684	11.0187	-0.876701	0.228625	-3.74047	0.000183679	0.00453499
HIST1H2BG	149.724	170.776	128.672	-0.405666	0.0931535	-3.7394	0.000184458	0.00454311
SCNN1A	20.0087	25.0202	14.9973	-0.701804	0.204707	-3.73932	0.00018452	0.00454311
EIF5B	67.8576	62.5579	73.1573	0.222517	0.0815382	3.73929	0.000184539	0.00454311
IRF2BP2	81.3214	74.3842	88.2585	0.243726	0.0948189	3.73901	0.000184745	0.00454381
MORC3	30.0775	25.3303	34.8248	0.44423	0.112046	3.7384	0.000185194	0.00455047
INSIG2	29.6885	25.4198	33.9572	0.40397	0.145062	3.73547	0.000187362	0.00459935
TRIM37	38.8636	34.9381	42.7891	0.285056	0.102685	3.73422	0.000188297	0.00461786
EHD4	22.6316	20.1061	25.1571	0.309543	0.107993	3.73329	0.000188997	0.00463061
EPHB2	5.93619	7.68673	4.18564	-0.744291	0.189803	-3.73238	0.000189681	0.00464292
OAS1	34.9146	29.7329	40.0962	0.419223	0.14586	3.73017	0.000191347	0.00467924
THRB	12.5858	15.7927	9.37899	-0.694163	0.153209	-3.72621	0.000194379	0.00474886
STK4	48.279	41.8627	54.6954	0.377837	0.0888225	3.72354	0.000196449	0.00479484
GPNMB	619.732	690.149	549.317	-0.328734	0.0732154	-3.72316	0.000196744	0.00479748
DNAJB6	193.432	175.869	210.994	0.261338	0.084037	3.72292	0.000196934	0.00479755
SLC22A5	18.9174	21.0099	16.8249	-0.304255	0.134314	-3.72178	0.000197823	0.00481435
PHF11	23.6937	19.1882	28.1992	0.53242	0.20283	3.72156	0.000197999	0.00481435
LYPD1	15.8932	19.6578	12.1286	-0.653979	0.193806	-3.7187	0.000200253	0.00486453
PSMD2	290.756	270.44	311.072	0.201243	0.0785721	3.71763	0.000201104	0.00488057
AFAP1L2	75.1012	69.2673	80.9352	0.22163	0.0893571	3.70919	0.000207923	0.00504129
PYROXD1	35.3166	32.0528	38.5804	0.260012	0.133259	3.70774	0.000209114	0.00506538
EHBP1L1	37.3066	34.4555	40.1576	0.215151	0.101236	3.70728	0.000209498	0.00506988
TLR6	2.37611	1.48573	3.26649	0.77938	0.330581	3.70601	0.000210547	0.00508897
IL6R	9.50575	11.6179	7.39365	-0.588096	0.166787	-3.70585	0.000210684	0.00508897
ZNF641	9.98671	7.54942	12.424	0.650916	0.180661	3.70345	0.000212691	0.00513261
TMEFF1	0.515009	0.102184	0.927833	0.806614	0.882995	3.69901	0.000216441	0.0052182
ABTB2	5.10008	4.00504	6.19512	0.523637	0.193575	3.69573	0.000219259	0.00528117
FAM107B	39.7856	32.4159	47.1552	0.527157	0.130403	3.69527	0.000219652	0.00528567
SH3KBP1	5.67319	3.69509	7.65128	0.881759	0.245661	3.69419	0.000220585	0.00530315
NEDD9	5.19116	4.45765	5.92467	0.343468	0.239505	3.6887	0.000225406	0.00541396
TWF1	162.177	146.779	177.575	0.27309	0.0846427	3.68746	0.000226505	0.00543527
GFPT1	34.6739	31.8742	37.4735	0.226909	0.0873949	3.68615	0.000227669	0.00545809
ADAM23	31.3841	35.2999	27.4683	-0.350612	0.123755	-3.6856	0.000228161	0.00546477
SDR42E1	22.6309	19.9735	25.2883	0.32585	0.112598	3.68483	0.000228852	0.00547621
SELENOW	100.131	120.507	79.7558	-0.589396	0.136505	-3.68426	0.000229365	0.00548336
GCLM	61.5601	55.2161	67.904	0.293604	0.0933049	3.68262	0.000230851	0.00551374
DPYSL2	48.022	44.1546	51.8894	0.228107	0.0900306	3.68145	0.000231915	0.00553401
CGAS	9.13909	7.31309	10.9651	0.525376	0.203877	3.67888	0.000234261	0.00558478
DNTTIP1	50.7503	41.3441	60.1564	0.530342	0.145555	3.67668	0.000236292	0.00562798
OSTM1	26.4283	21.4638	31.3929	0.528079	0.144839	3.67587	0.000237041	0.0056363
SEPT7	428.18	397.073	459.286	0.209499	0.0758235	3.67583	0.000237082	0.0056363
TRIM21	23.9668	19.9282	28.0053	0.470862	0.157535	3.67426	0.000238538	0.00566567
STAC	37.9215	45.9936	29.8494	-0.607224	0.126063	-3.67367	0.00023909	0.00567351
TRNP1	38.5207	32.272	44.7695	0.460078	0.136835	3.67245	0.000240237	0.00569546
YWHAH	131.248	116.291	146.204	0.327729	0.0999202	3.66937	0.000243149	0.00575916
DOCK9	48.0692	43.0969	53.0415	0.293392	0.0929554	3.66712	0.000245295	0.00580464
FLI1	3.10391	2.12611	4.08171	0.700946	0.329078	3.66484	0.000247497	0.00585134
ACAP3	13.1974	15.4576	10.9372	-0.463294	0.201864	-3.66323	0.000249057	0.0058815
CBX5	110.165	116.788	103.541	-0.17213	0.0725508	-3.66305	0.000249232	0.0058815
DENND5B	4.87364	6.27348	3.47381	-0.701144	0.228368	-3.66259	0.000249681	0.00588667
ZNF365	28.5647	24.6366	32.4927	0.385639	0.115099	3.65859	0.000253602	0.00597363
TMEM50A	93.1693	80.5496	105.789	0.389012	0.100159	3.65644	0.000255747	0.00601863
G3BP1	280.801	260.709	300.894	0.206084	0.0718548	3.65193	0.000260275	0.00611956
PSEN1	48.8796	43.2235	54.5358	0.328604	0.109347	3.64752	0.000264784	0.00621988
LYRM7	16.9145	21.4553	12.3738	-0.747647	0.130473	-3.64605	0.000266304	0.00624986
KRT8	759.223	684.303	834.144	0.285282	0.0757508	3.64493	0.000267463	0.0062671
TBK1	45.096	40.0717	50.1202	0.31575	0.110771	3.64487	0.000267528	0.0062671
PSMC6	176.189	156.001	196.377	0.330176	0.0894449	3.64373	0.000268712	0.00628909
HIST1H1A	70.8694	88.8165	52.9224	-0.736095	0.189401	-3.64256	0.000269937	0.006312
NUCKS1	287.437	313.291	261.584	-0.259325	0.066971	-3.6397	0.000272958	0.00637681
ADGRL2	14.4802	12.4028	16.5577	0.389569	0.147229	3.63687	0.000275966	0.00644123
ALDH3B1	7.67638	9.65445	5.69832	-0.669584	0.260668	-3.63491	0.000278075	0.00648113
ZNF608	1.10252	1.85065	0.354388	-1.07365	0.601523	-3.63481	0.000278182	0.00648113
NBPF9	60.7336	55.3076	66.1596	0.254264	0.0931485	3.63301	0.000280133	0.00652065
CCL5	2.3829	0.953947	3.81184	1.3002	0.572025	3.6293	0.000284186	0.006609
KIAA0513	4.97031	6.30575	3.63487	-0.656505	0.201284	-3.62751	0.000286165	0.006649
UBE2D3	218.907	192.614	245.201	0.346653	0.0838892	3.62633	0.000287475	0.00667337
DYRK2	44.3696	51.7544	36.9849	-0.473867	0.0937428	-3.62336	0.000290797	0.0067444
CLIP4	91.4107	87.7807	95.0406	0.113398	0.0919388	3.62217	0.000292146	0.00676955
DUS4L	27.0347	23.5004	30.5691	0.365706	0.156133	3.62143	0.000292975	0.00678263
B3GNT5	26.4728	23.246	29.6996	0.340475	0.121044	3.62072	0.000293786	0.00679526
PSMC1	370.505	331.236	409.774	0.306133	0.0853883	3.61761	0.000297331	0.00687104
UBA6	53.465	49.5489	57.3811	0.207822	0.0984201	3.61194	0.000303912	0.00701269
MAFG	18.0846	15.6273	20.542	0.373603	0.119879	3.61186	0.000304007	0.00701269
RP2	16.5397	14.08	18.9993	0.407317	0.136011	3.60993	0.000306281	0.00705462
HMGCR	99.8191	90.4592	109.179	0.268649	0.0855226	3.60985	0.000306375	0.00705462
RPL36AL	303.449	273.928	332.969	0.280665	0.0964937	3.60803	0.000308529	0.00709622
LRCH3	35.9468	30.797	41.0965	0.404807	0.119821	3.60786	0.000308736	0.00709622
GNB1	165.849	145.68	186.017	0.350492	0.0792672	3.60748	0.000309188	0.00710024
HIST1H2AB	217.188	267.675	166.701	-0.679971	0.179027	-3.59881	0.000319679	0.00733459
ZNF562	31.3568	27.2915	35.4221	0.364448	0.102764	3.59822	0.000320408	0.00734473
JMJD1C	44.064	42.2062	45.9219	0.119025	0.0888076	3.59767	0.00032108	0.00735357
PLCE1	5.92248	7.0485	4.79645	-0.473552	0.148176	-3.59541	0.000323881	0.00741109
FDPS	351.339	324.209	378.467	0.222607	0.0862696	3.59247	0.000327562	0.00748864
CD274	4.31543	2.44552	6.18532	1.06033	0.353312	3.58931	0.000331558	0.00757323
CCNF	24.1236	28.175	20.0722	-0.469392	0.112267	-3.58892	0.000332056	0.00757785
SRPK1	80.1733	71.165	89.1816	0.321533	0.0880445	3.58343	0.000339118	0.00773213
NUDCD1	39.02	34.0999	43.9402	0.356542	0.114153	3.58279	0.000339943	0.00774406
C5orf15	46.736	40.9728	52.4992	0.350061	0.124637	3.58153	0.000341583	0.00777449
AC241585.2	42.6456	32.2311	53.0601	0.70203	0.195973	3.5808	0.000342539	0.00778934
IDS	53.0239	48.1264	57.9213	0.262288	0.0888898	3.58008	0.000343483	0.00780388
PHLDA2	39.8685	31.1099	48.6271	0.62811	0.200329	3.57931	0.000344507	0.00782022
CHD3	55.2041	64.5923	45.816	-0.486526	0.0858367	-3.57441	0.000351015	0.00795463
ULBP2	12.9846	9.46914	16.5001	0.74122	0.242749	3.57439	0.000351049	0.00795463
NR2F1	9.03142	11.6704	6.39243	-0.777341	0.18998	-3.5735	0.000352244	0.00795929
KLK8	79.8918	96.3313	63.4524	-0.594671	0.184181	-3.5735	0.000352248	0.00795929
HIST1H2BO	476.731	555.104	398.359	-0.477668	0.119036	-3.57336	0.000352436	0.00795929
HLA-F	4.89515	3.11259	6.67772	0.900631	0.60219	3.57331	0.000352497	0.00795929
AP000295.1	4.67774	3.24232	6.11315	0.745638	0.250606	3.57307	0.000352823	0.00795963
SMN2	78.3484	71.694	85.0029	0.242549	0.126218	3.56769	0.000360136	0.00811748
ACBD3	60.7105	55.3976	66.0234	0.249032	0.0931227	3.56712	0.00036092	0.00812799
SSR3	200.932	185.499	216.366	0.220962	0.0772952	3.56676	0.000361424	0.00813219
ZNF362	28.5582	37.3674	19.749	-0.886843	0.18039	-3.56458	0.000364437	0.00819281
C3orf52	34.4492	30.2568	38.6416	0.342849	0.127547	3.56304	0.000366583	0.00823383
NUDT15	61.1787	54.5279	67.8295	0.309814	0.105438	3.56052	0.000370127	0.00830614
ATP6V1D	81.7481	69.3303	94.166	0.436302	0.112916	3.55734	0.000374629	0.00839982
BDP1	18.0075	16.1398	19.8752	0.28444	0.0954609	3.55632	0.000376089	0.00842518
NOTCH2	35.4954	33.6519	37.3388	0.145871	0.0824958	3.55519	0.000377712	0.00845416
CXCL10	0.484648	0	0.969297	0.977681	1.96013	3.55354	0.000380086	0.00849539
TRIM8	43.4196	35.8083	51.031	0.49934	0.121858	3.55345	0.000380218	0.00849539
BCL3	5.75709	3.79552	7.71867	0.862421	0.331132	3.55316	0.000380633	0.00849726
PDXK	153.634	161.662	145.606	-0.149938	0.0813232	-3.54313	0.000395414	0.00881955
GSTO2	60.041	69.4103	50.6717	-0.446413	0.128063	-3.54239	0.000396519	0.00883651
CPEB4	4.10529	2.49682	5.71377	0.94108	0.233808	3.53764	0.00040372	0.00898916
NFE2L2	100.627	92.605	108.649	0.228235	0.0895182	3.53667	0.000405199	0.00901427
IGF2R	49.9263	46.2332	53.6195	0.209614	0.075615	3.53531	0.000407299	0.00905007
PCLAF	184.091	211.417	156.767	-0.429105	0.109549	-3.53517	0.000407514	0.00905007
DLX6	2.73204	4.10618	1.35789	-1.11475	0.407199	-3.53404	0.000409263	0.00908103
TBC1D3K	0.60227	1.11709	0.087447	-0.961139	0.996331	-3.53076	0.000414366	0.00918631
PTPRB	19.6185	17.3762	21.8607	0.31503	0.106184	3.52708	0.000420167	0.00930077
MYO1D	33.6787	29.5738	37.7837	0.343155	0.102317	3.52703	0.000420255	0.00930077
KRT3	1.28852	2.07065	0.506382	-1.02746	0.579408	-3.5264	0.000421257	0.00931491
MAL2	568.754	535.702	601.807	0.167574	0.0672711	3.52503	0.000423439	0.00935508
NTAN1	45.955	36.0814	55.8287	0.615927	0.168927	3.52454	0.000424222	0.00936431
CDH1	214.732	200.976	228.488	0.184235	0.070417	3.52334	0.000426141	0.00939858
BSCL2	52.3702	63.7379	41.0025	-0.624133	0.195087	-3.52138	0.000429303	0.00946016
AC275440.1	3.55529	1.02534	6.08524	1.80666	0.754606	3.5205	0.000430739	0.00948366
MCFD2	117.759	106.689	128.829	0.269747	0.0796481	3.51971	0.000432024	0.00950378
SLC10A6	1.57754	0.589499	2.56559	1.16557	0.688546	3.51575	0.000438517	0.00963834
LRP1	25.0725	28.7675	21.3774	-0.411698	0.0839513	-3.51134	0.000445847	0.00979106
ELOVL7	6.8807	4.92419	8.83721	0.731631	0.199538	3.51106	0.000446325	0.00979317
ZNF217	43.6196	41.4203	45.819	0.142341	0.0895183	3.51006	0.000448012	0.00982178
PSMB7	702.023	650.573	753.472	0.21154	0.0810272	3.50325	0.000459619	0.0100599
ITGAM	0.511145	0.173766	0.848524	0.655228	0.95641	3.50323	0.00045966	0.0100599
CCNG2	14.7858	12.1578	17.4139	0.484877	0.171757	3.503	0.000460058	0.01006
USP15	92.3704	82.0288	102.712	0.320899	0.0932023	3.50226	0.000461331	0.0100703
FOXN2	26.5497	23.9868	29.1126	0.269204	0.120626	3.50208	0.000461641	0.0100703
SEMA6D	2.70429	4.10001	1.30857	-1.1435	0.504987	-3.50204	0.000461707	0.0100703
SLC12A6	26.2131	30.1349	22.2913	-0.418747	0.107336	-3.49943	0.000466261	0.010161
TMED7-TICAM2	5.55415	4.44006	6.66824	0.495271	0.236246	3.49614	0.000472047	0.0102784
SMC6	56.3227	51.666	60.9794	0.234919	0.0892513	3.49526	0.000473596	0.0103033
B4GALT5	49.6519	45.4499	53.8539	0.23992	0.0870016	3.49143	0.000480451	0.0104436
C5	31.1763	36.861	25.4916	-0.515182	0.112016	-3.4899	0.000483203	0.0104945
BACH1	47.0984	39.7803	54.4164	0.442438	0.106169	3.48522	0.000491725	0.0106706
NAGK	48.3295	38.7766	57.8823	0.565914	0.154549	3.4815	0.00049862	0.010811
CYP26B1	11.4698	8.93484	14.0048	0.59486	0.179289	3.48062	0.000500256	0.0108351
UXS1	42.2381	33.9624	50.514	0.559161	0.139501	3.48045	0.000500574	0.0108351
DNAJC2	80.3171	74.439	86.1953	0.208939	0.100177	3.4792	0.000502919	0.0108766
RSAD2	5.1574	3.8289	6.48588	0.632477	0.313434	3.47585	0.000509246	0.0110042
PCDH18	0.725409	1.08618	0.364633	-0.612354	0.542061	-3.47408	0.000512613	0.0110676
GCC2	25.1457	23.5271	26.7643	0.178852	0.147771	3.47251	0.000515622	0.0111232
ANK1	2.25269	2.77106	1.73432	-0.463785	0.252486	-3.47195	0.000516688	0.0111368
PHLPP2	22.9486	27.6202	18.2769	-0.570157	0.102491	-3.47013	0.000520214	0.0112034
PSMD13	208.679	192.714	224.644	0.22012	0.0898034	3.46956	0.000521312	0.0112176
TMTC2	6.00695	4.84274	7.17116	0.483896	0.186061	3.46925	0.000521906	0.0112188
ZNF165	13.839	11.0755	16.6025	0.543697	0.185392	3.46908	0.000522243	0.0112188
ADORA2BP1	2.31117	0.615577	4.00676	1.63183	0.794417	3.46883	0.000522739	0.0112201
ARHGAP26	18.7373	15.9529	21.5217	0.409784	0.144381	3.46285	0.000534485	0.0114626
MBOAT1	26.691	32.048	21.3341	-0.565318	0.151978	-3.46234	0.000535503	0.0114748
TRIM44	40.8043	39.6721	41.9365	0.0781651	0.0805441	3.46089	0.000538389	0.011527
KLHL13	16.3913	19.3956	13.3869	-0.503506	0.153868	-3.46018	0.000539809	0.0115478
RTN4	361.317	334.315	388.318	0.215432	0.0773196	3.45621	0.000547829	0.0117096
PAK6	29.3521	36.0046	22.6996	-0.64284	0.129338	-3.45575	0.000548754	0.0117196
ROCK1	58.5362	56.4963	60.5761	0.0989038	0.0864959	3.45356	0.000553236	0.0118054
EIF2S3	246.916	230.653	263.178	0.189551	0.0738451	3.45138	0.000557727	0.0118914
ARHGAP35	40.8419	46.2413	35.4425	-0.374427	0.0813406	-3.44863	0.000563431	0.0120011
WIPI1	10.3809	7.40053	13.3613	0.773628	0.273244	3.44845	0.000563812	0.0120011
HIST1H2AE	763.629	860.167	667.091	-0.366248	0.0877345	-3.44795	0.000564862	0.0120028
NCR3LG1	10.7893	9.09777	12.4808	0.416864	0.128019	3.4478	0.000565175	0.0120028
ESF1	43.3943	39.0981	47.6906	0.280111	0.100236	3.44774	0.000565293	0.0120028
RPS6KA2	10.3926	7.65977	13.1255	0.705901	0.184487	3.44747	0.000565864	0.0120049
SEC24D	30.0902	27.6133	32.5671	0.230367	0.113517	3.44535	0.000570311	0.0120893
KIF18B	21.9395	25.7915	18.0875	-0.489147	0.125459	-3.44401	0.00057316	0.0121396
AKAP13	90.0266	87.5523	92.5008	0.0784497	0.0779047	3.44316	0.00057495	0.0121675
VCL	109.32	102.206	116.434	0.186321	0.0760196	3.44182	0.000577809	0.0122179
DTX3L	54.4717	49.4834	59.4601	0.260175	0.0819677	3.44	0.000581721	0.0122905
PPIF	119.964	107.198	132.73	0.305644	0.0933451	3.4395	0.000582792	0.012303
ASAP1	53.2101	49.4156	57.0046	0.202299	0.0964152	3.43915	0.000583539	0.0123086
MFSD1	67.3301	61.1792	73.481	0.260439	0.110272	3.43407	0.000594589	0.0125313
RFTN1	6.40245	4.9033	7.9016	0.592542	0.292428	3.43329	0.000596299	0.0125571
SEMA4B	36.1082	32.2176	39.9987	0.303628	0.123353	3.43281	0.000597371	0.0125693
CHAC1	1.86359	0.630799	3.09638	1.32877	0.623063	3.43151	0.000600224	0.012619
CTSV	48.0165	56.0689	39.9641	-0.478346	0.131572	-3.43041	0.000602666	0.0126599
ZBTB7B	23.6754	28.6856	18.6651	-0.594132	0.151675	-3.42786	0.000608353	0.0127689
STK3	63.9592	58.3421	69.5764	0.25013	0.103816	3.42757	0.000609016	0.0127724
SMTN	9.0644	6.98485	11.144	0.604901	0.215937	3.42725	0.000609726	0.0127768
TNS4	83.425	77.8287	89.0214	0.191547	0.0839628	3.42681	0.00061071	0.0127807
PPT1	150.15	168.036	132.264	-0.343043	0.0844694	-3.42672	0.000610908	0.0127807
CAMKK1	9.00796	11.0352	6.98072	-0.592669	0.180467	-3.42588	0.000612816	0.0128014
CHD2	140.196	137.316	143.076	0.058862	0.0857191	3.42584	0.000612899	0.0128014
MARCKS	149.906	138.807	161.005	0.212602	0.0791038	3.42128	0.000623269	0.0130074
C1GALT1	36.9735	32.752	41.1949	0.322094	0.125756	3.42061	0.000624806	0.0130289
PNRC1	25.7774	22.6835	28.8713	0.334883	0.16111	3.4201	0.00062599	0.013043
NXT2	17.1393	14.5857	19.6928	0.408906	0.162939	3.41854	0.000629591	0.0131074
TBX3	12.2212	10.7215	13.721	0.328714	0.156094	3.41491	0.000638038	0.0132724
SPAG1	30.874	26.799	34.949	0.370921	0.114418	3.41373	0.00064081	0.0133193
STXBP3	39.9086	36.1449	43.6724	0.266218	0.131337	3.41081	0.00064771	0.0134518
HHEX	3.54661	2.0308	5.06241	1.00019	0.411062	3.40698	0.000656868	0.0136309
MEF2C	8.78255	11.6071	5.95799	-0.857494	0.279428	-3.40635	0.000658365	0.013651
BUB1B	65.1539	71.2217	59.086	-0.265403	0.0935725	-3.40523	0.000661084	0.0136962
PRRG4	41.6249	46.7411	36.5088	-0.348001	0.0874513	-3.40331	0.000665753	0.0137818
SGMS2	14.2776	11.8568	16.6984	0.461082	0.148461	3.40216	0.000668561	0.0138288
PELI1	11.8611	9.7339	13.9884	0.481667	0.175655	3.39896	0.000676436	0.0139804
LZTS2	19.8699	24.2605	15.4794	-0.616227	0.156138	-3.3964	0.000682794	0.0141004
MPPED2	6.38828	9.31709	3.45946	-1.2101	0.288685	-3.39182	0.000694289	0.0143263
TVP23B	70.3149	64.4309	76.199	0.238611	0.113565	3.39131	0.000695594	0.0143417
CDH4	4.57271	3.62079	5.52464	0.497759	0.189689	3.38746	0.000705418	0.0145093
SPOPL	11.8138	10.2125	13.415	0.362457	0.145462	3.38737	0.000705664	0.0145093
TRAP1	138.635	153.81	123.46	-0.314817	0.0916389	-3.38724	0.000705989	0.0145093
TLE1	44.2595	37.4323	51.0866	0.438591	0.117562	3.38636	0.000708272	0.0145446
HRK	10.0015	12.221	7.782	-0.590214	0.2073	-3.38214	0.000719231	0.0147578
RIOK3	83.2478	76.3254	90.1703	0.237622	0.0902695	3.37404	0.000740726	0.0151867
PIK3CA	25.7692	25.0251	26.5132	0.0802229	0.11262	3.37294	0.000743688	0.0152352
KLHDC7B	0.297147	0.0374385	0.556855	0.585609	1.1502	3.37251	0.00074486	0.015247
FOXO3	22.331	20.6824	23.9794	0.204214	0.0961465	3.37169	0.000747098	0.0152806
SYNJ2	23.0026	21.1122	24.8929	0.227714	0.10648	3.37024	0.000751036	0.0153375
VPS26A	129.93	118.091	141.77	0.26164	0.0871189	3.37022	0.000751075	0.0153375
ZMYND15	2.39671	1.45503	3.33839	0.821417	0.40861	3.36914	0.000754044	0.0153859
SLC25A43	30.4374	26.6727	34.2022	0.3472	0.120215	3.36683	0.000760374	0.0155027
SASH1	15.8086	18.6747	12.9425	-0.496856	0.120493	-3.36324	0.000770343	0.0156935
SORBS1	2.32282	1.63033	3.01532	0.610272	0.297976	3.36153	0.000775114	0.0157759
WNT7A	11.8152	9.67067	13.9597	0.487435	0.19678	3.36135	0.000775621	0.0157759
PRRC2C	228.39	212.01	244.769	0.206385	0.0728866	3.35982	0.000779942	0.0158431
ZNF292	24.9015	24.7076	25.0953	0.0215951	0.121938	3.35974	0.000780161	0.0158431
ST6GALNAC5	18.232	15.3248	21.1392	0.439533	0.160405	3.35778	0.000785702	0.015943
IRX2	28.1166	32.828	23.4051	-0.471034	0.127996	-3.3571	0.000787635	0.0159696
TP63	101.686	95.1979	108.174	0.182553	0.0796926	3.35489	0.000793965	0.0160852
MYC	60.1085	54.2137	66.0033	0.279206	0.106107	3.35431	0.000795632	0.0161062
DAPK1	44.3763	50.1874	38.5652	-0.371558	0.0981063	-3.35101	0.000805165	0.0162799
MYO1B	310.282	295.717	324.848	0.135109	0.0688818	3.3509	0.000805485	0.0162799
CMPK1	124.602	113.115	136.089	0.264636	0.0869562	3.35067	0.00080616	0.0162807
ARMCX1	4.77377	3.24564	6.3019	0.782291	0.303564	3.34926	0.000810267	0.0163508
VSNL1	81.7422	92.2467	71.2378	-0.3683	0.108702	-3.34746	0.00081556	0.0164447
SERPINB4	1.54598	0.774218	2.31773	0.903016	0.655497	3.3466	0.000818101	0.0164829
SOX12	4.42593	5.58253	3.26932	-0.624634	0.212667	-3.34516	0.000822339	0.0165553
PDCD5	169.85	148.828	190.871	0.356829	0.129582	3.34459	0.000824053	0.0165768
TRIM59	39.9915	45.7689	34.2139	-0.409404	0.112169	-3.34384	0.000826261	0.0166082
TAF13	73.8295	63.3083	84.3508	0.4084	0.145793	3.34193	0.00083197	0.0167098
BBC3	2.17102	0.776743	3.5653	1.36148	0.604639	3.3399	0.000838092	0.0168196
LINC00869	39.199	24.7792	53.6188	1.08319	0.244348	3.33898	0.000840852	0.0168618
PDCD10	135.756	119.965	151.548	0.334684	0.112705	3.337	0.000846879	0.0169694
FAM83D	39.26	45.2587	33.2613	-0.433143	0.116153	-3.33648	0.000848464	0.0169878
DNAJB11	110.925	100.874	120.976	0.259811	0.0950835	3.3361	0.000849622	0.0169978
CHMP4B	107.875	98.2668	117.483	0.255298	0.0956463	3.33531	0.00085204	0.0170224
TMEM265	30.9866	16.9279	45.0452	1.36084	0.430795	3.33527	0.000852181	0.0170224
C3orf67	9.85841	7.60213	12.1147	0.60842	0.218575	3.33369	0.000857008	0.0171054
HIST1H2BK	576.423	660.354	492.493	-0.422393	0.111015	-3.33199	0.000862272	0.0171971
DIAPH1	194.319	180.452	208.187	0.205209	0.0712344	3.33168	0.00086324	0.0172031
IRS2	2.91949	2.31993	3.51905	0.444865	0.197784	3.33114	0.000864904	0.0172228
PPP3CA	34.108	31.8195	36.3964	0.188346	0.104719	3.3287	0.000872529	0.0173565
KBTBD2	44.2288	40.0027	48.4549	0.270393	0.105827	3.32856	0.000872974	0.0173565
NMI	50.5372	44.0682	57.0062	0.364099	0.123877	3.32683	0.000878406	0.0174456
FUT2	8.65657	7.49606	9.81707	0.348444	0.2408	3.3267	0.000878815	0.0174456
TRIM29	219.091	236.106	202.077	-0.223502	0.0765742	-3.32512	0.000883805	0.0175311
APOL6	20.6129	18.9312	22.2947	0.22497	0.0885955	3.32381	0.000887955	0.0175998
CDRT1	27.0448	22.0219	32.0677	0.522414	0.17328	3.32194	0.000893926	0.0177044
SLC25A37	27.3085	24.7487	29.8683	0.261626	0.117936	3.32031	0.000899174	0.0177821
IGFL1	3.78822	1.43987	6.13657	1.54843	0.646852	3.32029	0.000899236	0.0177821
CANT1	47.6955	41.7698	53.6213	0.352874	0.104814	3.31985	0.000900665	0.0177966
GAN	9.65914	11.5821	7.73623	-0.526283	0.111271	-3.31847	0.000905126	0.017871
AL139300.1	7.53055	5.7344	9.3267	0.616757	0.226262	3.31784	0.000907175	0.0178977
NBPF14	67.5465	61.1199	73.9732	0.271319	0.0851726	3.31493	0.000916661	0.0180709
ETV5	12.689	9.73804	15.64	0.63192	0.193842	3.31283	0.000923562	0.018193
ARHGDIA	225.564	204.103	247.024	0.274125	0.0819972	3.31158	0.000927707	0.0182606
CAT	44.9902	52.0508	37.9296	-0.446506	0.11724	-3.30959	0.000934324	0.0183626
TRAM1	165.631	151.578	179.684	0.243913	0.0840434	3.30763	0.000940892	0.0184641
C1QTNF1	2.23745	1.09874	3.37616	1.06014	0.498393	3.30742	0.000941609	0.0184641
MGLL	6.10074	3.92369	8.27778	0.914038	0.223397	3.3074	0.00094165	0.0184641
ARPC3	404.314	374.599	434.028	0.211913	0.0867506	3.30646	0.000944828	0.0185123
PLSCR1	111.43	99.7748	123.086	0.300205	0.112929	3.30561	0.000947688	0.0185541
ZBED1	5.86302	3.96558	7.76046	0.819044	0.218748	3.30086	0.000963905	0.0188572
PTPN3	39.5639	38.4113	40.7163	0.0820018	0.0913933	3.29969	0.000967926	0.0189214
TLE3	13.6446	17.9038	9.38536	-0.864129	0.158485	-3.29899	0.000970323	0.0189287
EFL1	41.0715	35.4564	46.6866	0.38741	0.117205	3.29898	0.000970359	0.0189287
RELA	37.8376	32.8413	42.834	0.373266	0.119314	3.29894	0.000970513	0.0189287
ADTRP	12.6732	8.84657	16.4999	0.829654	0.298747	3.2977	0.000974786	0.0189976
UFM1	64.2695	58.5401	69.9989	0.253933	0.1019	3.29582	0.000981359	0.0191111
ARL1	108.308	92.4244	124.191	0.42226	0.101459	3.2953	0.000983176	0.019132
SLC9A1	25.5735	22.0017	29.1453	0.390193	0.117537	3.29182	0.000995408	0.0193553
USP12	25.179	22.6101	27.7479	0.284055	0.114716	3.29116	0.000997741	0.0193719
STK17A	76.2177	70.2597	82.1757	0.223077	0.0921167	3.29115	0.000997772	0.0193719
MYL12B	238.349	218.476	258.223	0.240134	0.097985	3.29061	0.000999695	0.0193945
GRN	46.9143	40.8839	52.9449	0.365091	0.118788	3.28682	0.00101324	0.0196425
PTP4A2	378.748	347.026	410.471	0.241596	0.0766006	3.28582	0.00101685	0.0196976
FCHO2	25.6837	23.3231	28.0443	0.255922	0.123169	3.28354	0.00102512	0.0198428
DCHS1	0.281316	0.133061	0.429571	0.335357	0.531869	3.28068	0.00103556	0.0200297
TSEN34	26.0339	32.3792	19.6885	-0.690119	0.168423	-3.27874	0.0010427	0.0201526
EIF4G2	805.899	742.555	869.244	0.22698	0.0673778	3.27721	0.00104837	0.0202468
BRCA2	19.2246	18.5739	19.8752	0.0928551	0.099017	3.27307	0.00106385	0.0205304
GLUL	72.4438	82.5525	62.3351	-0.39968	0.091954	-3.27216	0.0010673	0.0205815
SERPINB5	982.862	924.87	1040.85	0.170271	0.0738812	3.26983	0.00107611	0.0207357
HIST2H2AC	1726.13	1926.75	1525.52	-0.336676	0.0888224	-3.2693	0.00107813	0.020759
USP32	42.2935	39.6664	44.9206	0.175302	0.0956552	3.26625	0.00108981	0.0209683
SLPI	91.7795	75.7458	107.813	0.503695	0.172533	3.25548	0.00113199	0.0217634
NSUN2	113.965	107.139	120.79	0.171502	0.0822712	3.25508	0.00113359	0.0217778
BIRC5	84.4487	96.3426	72.5548	-0.404251	0.0950556	-3.24938	0.00115658	0.0222029
ZBTB10	2.18333	1.55208	2.81458	0.579848	0.282402	3.24832	0.0011609	0.0222692
HNRNPA1P33	202.957	178.405	227.51	0.349034	0.127444	3.2479	0.00116259	0.0222849
ABI1	66.2596	59.9757	72.5435	0.270364	0.0927598	3.24739	0.00116467	0.0223075
AOC1	1.09308	1.70365	0.482508	-0.866871	0.68962	-3.24719	0.00116551	0.0223075
DYNLT3	23.8701	20.3501	27.3901	0.411142	0.152069	3.24528	0.00117337	0.0224411
COG5	42.8987	39.7923	46.0052	0.204524	0.110193	3.24406	0.00117839	0.0225202
UBE2Z	65.3956	59.224	71.5671	0.268979	0.0998601	3.24272	0.00118393	0.0225955
SLC47A2	1.73948	2.51641	0.962547	-0.841376	0.484377	-3.24269	0.00118409	0.0225955
NEK7	58.6296	56.973	60.2863	0.0801823	0.0996087	3.24081	0.00119191	0.0227198
HLA-E	15.1406	12.9444	17.3368	0.39506	0.163612	3.2407	0.00119238	0.0227198
MED13L	28.0667	26.8055	29.328	0.125283	0.0898968	3.24032	0.00119396	0.0227332
IFFO2	21.7086	19.0621	24.3551	0.337803	0.111759	3.23951	0.00119736	0.0227809
NBPF20	27.4809	24.5635	30.3982	0.296594	0.120718	3.23876	0.00120052	0.0228241
AL022318.4	0.219632	0.439264	0	-0.525331	2.02428	-3.23854	0.00120144	0.0228247
BNC1	46.2934	42.4268	50.16	0.236431	0.0920523	3.23774	0.00120482	0.0228719
IFI44	12.4554	8.72508	16.1856	0.821423	0.297263	3.23555	0.00121407	0.0230285
HIST1H2BC	643.871	721.735	566.009	-0.350095	0.0878165	-3.23537	0.00121486	0.0230285
SEMA7A	5.30544	3.87234	6.73854	0.667448	0.249852	3.23411	0.00122024	0.0231134
PSMD14	155.827	144.051	167.603	0.217074	0.0882283	3.23227	0.0012281	0.0232296
AAED1	25.7909	22.4764	29.1055	0.35881	0.132664	3.23225	0.00122819	0.0232296
AL049629.2	9.05617	4.7861	13.3262	1.308	0.4883	3.22978	0.00123887	0.0234143
ACER3	32.1464	28.9065	35.3862	0.282934	0.105667	3.22688	0.00125148	0.0236352
ZNF518A	13.1485	12.8717	13.4253	0.0564619	0.144988	3.22485	0.00126037	0.0237856
COL13A1	4.36596	2.74431	5.98761	0.900096	0.339512	3.22358	0.001266	0.0238742
HIST1H2AJ	553.522	632.402	474.642	-0.413244	0.111334	-3.22175	0.00127411	0.0240095
APOBEC3C	32.8299	29.1929	36.4668	0.311401	0.116108	3.21724	0.00129429	0.0243719
BACE2	75.63	66.9372	84.3229	0.328731	0.100839	3.21378	0.00131002	0.0246498
CDH8	6.34424	7.49794	5.19054	-0.457049	0.280274	-3.21315	0.00131286	0.0246852
S100A14	776.736	861.544	691.927	-0.315897	0.080984	-3.21153	0.00132029	0.0248004
FAM177A1	61.4939	51.4746	71.5132	0.466627	0.132947	3.21139	0.00132092	0.0248004
WASL	47.7237	43.9901	51.4573	0.221534	0.088842	3.20997	0.0013275	0.0249057
ARHGAP23	52.6009	58.4477	46.754	-0.315999	0.082039	-3.20853	0.00133417	0.0250124
CCNC	107.621	102.831	112.41	0.127308	0.0984361	3.20695	0.00134152	0.0251319
YAP1	108.429	101.468	115.39	0.183801	0.0813374	3.20634	0.00134435	0.0251362
HACD2	105.212	116.207	94.2161	-0.299787	0.0779141	-3.20627	0.00134468	0.0251362
CD164	123.061	113.966	132.156	0.211904	0.0819775	3.20627	0.00134469	0.0251362
TSPAN5	14.0795	12.3977	15.7613	0.323154	0.166879	3.2042	0.00135438	0.0252989
EIF2A	156.559	148.673	164.445	0.144529	0.0885066	3.20053	0.00137177	0.0256051
SMCR8	19.78	18.0889	21.4712	0.235344	0.0959031	3.19907	0.00137872	0.025716
MARCO	8.76181	4.69024	12.8334	1.28159	0.42692	3.19806	0.00138356	0.0257876
BMP4	18.0328	22.6502	13.4154	-0.714237	0.205175	-3.19637	0.00139169	0.0259202
DOCK10	17.2678	16.3133	18.2223	0.150908	0.125022	3.19538	0.00139648	0.0259905
FGF2	3.85914	2.99411	4.72417	0.519194	0.205103	3.19161	0.00141482	0.0262937
DENND2C	19.8686	17.1686	22.5687	0.375418	0.113159	3.1884	0.00143062	0.0265489
UQCRH	375.106	426.602	323.61	-0.397561	0.102621	-3.18604	0.00144232	0.0267467
YPEL5	27.6895	24.3651	31.0138	0.335844	0.142449	3.1831	0.00145707	0.0270005
C6orf62	66.2695	61.852	70.687	0.189753	0.0855403	3.18225	0.00146134	0.0270601
IFIT5	32.5947	29.4072	35.7823	0.274599	0.108418	3.18042	0.0014706	0.0272119
SULT1A3	27.6418	34.2455	21.038	-0.677442	0.211388	-3.17965	0.00147455	0.0272653
MATN2	66.0957	76.3521	55.8393	-0.444553	0.0991512	-3.1782	0.00148192	0.0273751
ARHGEF40	12.4639	10.0277	14.9	0.527889	0.15724	3.17786	0.00148368	0.0273751
NCOR2	56.9074	63.8458	49.9689	-0.347395	0.0935808	-3.17785	0.00148369	0.0273751
PDE4D	25.7449	24.6155	26.8742	0.121911	0.130814	3.17453	0.00150078	0.0276631
TNFRSF1B	1.44832	0.85865	2.03798	0.708857	0.414609	3.1744	0.00150146	0.0276631
PCDH1	94.7336	88.1913	101.276	0.197493	0.0830024	3.17298	0.00150884	0.0277791
LPAR1	47.8239	44.1753	51.4725	0.216026	0.100058	3.16952	0.00152689	0.0280913
PARVA	28.8808	26.1288	31.6329	0.266502	0.106692	3.16817	0.00153404	0.0282025
GPR37L1	1.02103	0.653037	1.38902	0.5313	0.361239	3.16576	0.00154678	0.0284164
FAM83A	5126.62	6947.81	3305.43	-1.07149	0.31758	-3.16344	0.00155914	0.028623
EIF2S2	177.319	166.043	188.595	0.182693	0.0770348	3.16318	0.00156058	0.0286288
RFK	59.7314	53.2194	66.2434	0.310585	0.110629	3.16122	0.00157109	0.028798
BMP1	34.1709	38.1611	30.1807	-0.328768	0.116853	-3.16092	0.0015727	0.028798
COPB1	139.838	129.39	150.286	0.21445	0.0869839	3.16084	0.00157317	0.028798
ENAH	138.173	150.344	126.003	-0.252964	0.0787426	-3.15717	0.00159307	0.0291263
SRSF5	203.935	191.657	216.214	0.173075	0.0847749	3.15712	0.00159338	0.0291263
SPAG5	72.3871	83.1264	61.6479	-0.425292	0.0903875	-3.1562	0.00159838	0.0291968
DDX24	64.5627	51.636	77.4894	0.576448	0.132964	3.1559	0.00160006	0.0292067
MED13	66.1596	60.5111	71.8082	0.243254	0.0786079	3.15369	0.0016122	0.0294075
TP73	1.84685	2.57106	1.12265	-0.750489	0.337134	-3.15209	0.00162104	0.0295476
C20orf27	34.6337	41.6998	27.5678	-0.57984	0.173584	-3.15011	0.00163209	0.0297278
ALDH7A1	86.5349	99.0497	74.0202	-0.415366	0.109216	-3.1487	0.00164	0.0298508
TBC1D15	40.3705	36.4588	44.2822	0.273643	0.127211	3.14807	0.00164351	0.0298935
ACOT9	76.0742	67.285	84.8633	0.330473	0.118645	3.14619	0.00165414	0.0300654
MYO6	27.4499	24.9751	29.9246	0.251626	0.0974321	3.14493	0.00166127	0.0301736
GTF2H1	92.9343	86.3393	99.5293	0.202913	0.0949527	3.14382	0.00166759	0.0302665
SERINC1	49.4115	44.9949	53.828	0.25344	0.100837	3.14362	0.00166874	0.0302665
WTAP	112.024	102.158	121.891	0.252522	0.0965151	3.14075	0.00168518	0.0305429
PROSER2	20.7853	17.5927	23.9779	0.425916	0.163339	3.14029	0.00168778	0.0305686
ROR1	7.3223	6.35346	8.29114	0.337433	0.18265	3.13887	0.00169599	0.0306955
KIF5B	112.551	105.695	119.406	0.174419	0.0746758	3.13733	0.00170494	0.0308357
ACTR2	284.116	266.527	301.705	0.17823	0.0710503	3.13632	0.00171082	0.0309202
SPCS3	55.2556	51.0339	59.4773	0.216942	0.0941672	3.13456	0.00172114	0.0310849
KIAA1109	17.3746	15.9857	18.7635	0.218518	0.10378	3.13302	0.00173019	0.0312263
CRIP2	25.4367	30.2182	20.6552	-0.527672	0.185688	-3.1324	0.00173383	0.03127
SCARA3	25.379	29.0738	21.6843	-0.406813	0.123343	-3.13208	0.00173571	0.0312818
KIAA1671	27.2405	30.5861	23.895	-0.343434	0.0865111	-3.13126	0.00174057	0.0313475
KRT19	365.704	404.197	327.209	-0.304008	0.0812107	-3.12814	0.00175918	0.0316562
OSBPL2	66.8191	59.1203	74.5179	0.328967	0.100521	3.12797	0.00176019	0.0316562
USO1	43.8952	40.08	47.7103	0.24579	0.101692	3.12712	0.00176527	0.0317254
PHB2	232.084	259.505	204.665	-0.341016	0.0868158	-3.12664	0.00176815	0.0317548
USP53	19.0297	15.7614	22.298	0.475062	0.13583	3.12602	0.00177192	0.0318003
ACKR3	3.8873	5.22126	2.55335	-0.808029	0.376608	-3.12538	0.00177574	0.0318465
APOBEC3F	8.84295	8.03078	9.65511	0.238622	0.248024	3.124	0.00178409	0.0319739
BZW1	274.4	253.488	295.312	0.219519	0.0798894	3.12265	0.00179228	0.0320983
TRIP4	34.1768	31.8122	36.5414	0.194248	0.144333	3.12206	0.0017959	0.0321406
SLC20A2	79.4529	73.0431	85.8626	0.230369	0.0979292	3.11761	0.00182322	0.0325839
CFLAR	26.7261	21.7612	31.6911	0.522322	0.118613	3.11669	0.00182893	0.0326633
ACACA	40.0332	44.0932	35.9733	-0.286426	0.0847715	-3.11393	0.00184611	0.0329294
HIST1H3A	124.643	155.116	94.1706	-0.71403	0.225976	-3.11389	0.0018464	0.0329294
ERN1	13.4619	13.2889	13.6349	0.034513	0.190557	3.11016	0.00186987	0.0333248
LDLRAP1	23.4682	26.6816	20.2549	-0.381133	0.154048	-3.10903	0.00187702	0.0334289
CHMP2B	48.6232	44.1086	53.1378	0.263235	0.110322	3.10846	0.00188065	0.0334704
TPP2	62.4479	59.1758	65.7199	0.148934	0.0917096	3.10802	0.00188348	0.0334881
RTKN	63.8154	57.7289	69.9018	0.271749	0.118953	3.10786	0.00188446	0.0334881
HAP1	5.35261	7.10462	3.6006	-0.816923	0.285582	-3.10769	0.00188557	0.0334881
HEY1	5.27729	6.8956	3.65897	-0.761037	0.29043	-3.10707	0.00188952	0.033504
IFT57	42.4584	38.5104	46.4062	0.262843	0.127578	3.10704	0.00188971	0.033504
ZDHHC2	7.1816	4.28292	10.0803	1.06859	0.220524	3.10693	0.00189039	0.033504
BRAT1	15.9823	18.565	13.3996	-0.442241	0.168097	-3.10599	0.0018964	0.0335875
OR2I1P	0.558862	0.280768	0.836955	0.520307	0.563377	3.10481	0.00190402	0.033699
CCDC125	8.76927	11.0718	6.46675	-0.693086	0.209219	-3.10374	0.00191094	0.0337981
HIST1H4F	104.407	135.097	73.7173	-0.865122	0.269461	-3.10045	0.00193225	0.0341515
SEMA3D	35.0258	40.1752	29.8762	-0.41528	0.0993682	-3.09711	0.00195415	0.0345147
KCTD9	76.7122	74.0084	79.416	0.10043	0.094078	3.09466	0.0019704	0.0347778
MT-ND5	4134.15	3881.33	4386.97	0.176629	0.0742305	3.09387	0.00197562	0.0348267
APC	25.5905	24.9096	26.2714	0.0738994	0.0952782	3.09383	0.00197589	0.0348267
MYOF	652.648	624.73	680.567	0.123315	0.0648967	3.09357	0.00197765	0.0348339
LMTK2	20.5789	18.5256	22.6323	0.275393	0.0957044	3.09299	0.00198153	0.0348637
SOCS1	1.59763	0.57841	2.61685	1.19626	0.721187	3.09286	0.00198235	0.0348637
IQGAP1	333.44	305.623	361.257	0.240552	0.0670918	3.09257	0.00198435	0.0348637
GPX2	120.636	137.266	104.005	-0.396982	0.115069	-3.0925	0.00198479	0.0348637
PLK3	10.1379	7.98818	12.2877	0.56399	0.267418	3.09044	0.00199857	0.0350818
OCIAD2	93.3952	76.8174	109.973	0.512043	0.136582	3.08998	0.00200169	0.0351125
ADAM9	125.581	117.969	133.194	0.173735	0.0838929	3.08931	0.00200625	0.0351451
RCAN3	24.3659	21.948	26.7838	0.27587	0.106556	3.0893	0.00200629	0.0351451
HIST1H2BL	344.123	394.965	293.28	-0.428183	0.120545	-3.08877	0.0020099	0.0351842
FASN	100.666	113.574	87.7589	-0.368316	0.076359	-3.08808	0.00201458	0.035242
DBP	11.2315	13.4229	9.04007	-0.522593	0.21788	-3.08667	0.0020241	0.0353791
FDFT1	68.6002	61.7015	75.4989	0.286941	0.113031	3.08652	0.00202517	0.0353791
SEMA3F	8.0839	10.4345	5.73327	-0.764017	0.212181	-3.08454	0.00203867	0.0355906
WNT7B	3.90369	4.92683	2.88056	-0.610995	0.261631	-3.08109	0.00206242	0.0359808
GABPB1	43.9213	37.9541	49.8884	0.385562	0.126961	3.08026	0.0020682	0.036057
NADSYN1	59.3963	67.9629	50.8297	-0.41204	0.114841	-3.07731	0.0020888	0.0363914
C3orf58	19.8077	17.618	21.9974	0.30477	0.133843	3.07531	0.00210285	0.0366113
GALNT4	4.90234	3.9852	5.81949	0.452014	0.193927	3.07446	0.00210883	0.0366806
RAB9A	35.3511	30.7713	39.931	0.365468	0.151984	3.07434	0.00210969	0.0366806
ESCO1	19.0052	17.7022	20.3082	0.188197	0.119354	3.07219	0.00212493	0.0369204
AGFG1	59.556	54.7212	64.3909	0.230865	0.0984855	3.07077	0.00213509	0.0370719
C11orf68	14.3734	11.3362	17.4106	0.577633	0.219743	3.06988	0.00214144	0.0371569
C5AR2	1.39729	0.987305	1.80727	0.498354	0.302794	3.0696	0.00214345	0.0371667
SLC5A1	0.717365	0.316666	1.11806	0.685856	0.533117	3.06933	0.0021454	0.0371754
ST3GAL4	29.5035	35.7548	23.2522	-0.59982	0.177903	-3.0682	0.00215349	0.0372904
CHST11	13.5122	11.465	15.5594	0.409768	0.135389	3.0659	0.00217015	0.0375533
SLX1B	68.274	80.301	56.2471	-0.506072	0.148762	-3.06443	0.00218086	0.0377133
SRFBP1	25.0199	21.899	28.1408	0.347753	0.132524	3.06377	0.0021857	0.0377715
MAP3K13	43.058	36.8714	49.2446	0.40786	0.123613	3.05998	0.0022135	0.0382234
HSPA1B	34.5095	39.5688	29.4502	-0.413919	0.119647	-3.0597	0.00221555	0.0382234
GATA2	17.5977	21.1152	14.0801	-0.552388	0.179324	-3.0596	0.00221633	0.0382234
CYP4F3	11.9568	14.2248	9.68878	-0.510329	0.177681	-3.05783	0.00222949	0.0384246
RIF1	44.9271	42.5497	47.3044	0.149492	0.0796188	3.0576	0.00223114	0.0384273
PIR	95.6851	108.468	82.9027	-0.383713	0.119842	-3.05553	0.00224661	0.0386495
ZBTB12	0.88799	0.390523	1.38546	0.778638	1.00009	3.05547	0.00224706	0.0386495
DLD	189.229	177.452	201.006	0.178859	0.083969	3.05301	0.00226558	0.0389206
TLN2	2.50247	3.56956	1.43538	-0.907913	0.314071	-3.05297	0.00226586	0.0389206
TLNRD1	6.93091	5.76384	8.09798	0.427703	0.18013	3.05112	0.00227986	0.0391085
TRAF7	44.3928	50.3278	38.4579	-0.379428	0.0992976	-3.04917	0.00229476	0.0393378
CDKN3	176.261	201.676	150.845	-0.416571	0.117555	-3.04809	0.00230299	0.0394526
LGALSL	18.7138	16.5317	20.8957	0.320681	0.13619	3.04755	0.00230715	0.0394975
TPRA1	26.7407	22.601	30.8805	0.433829	0.170927	3.04676	0.00231325	0.0395754
MTSS1	5.57441	4.10841	7.04042	0.654397	0.306892	3.04561	0.00232208	0.0397
PLPPR5	0.458038	0.180535	0.735541	0.555944	0.74478	3.04451	0.00233062	0.0398194
ZFP91	98.0981	92.3496	103.847	0.167562	0.0749125	3.04302	0.0023422	0.0399905
SLC7A8	29.7019	33.7704	25.6334	-0.384625	0.129151	-3.04211	0.00234927	0.0400847
GPD2	107.011	98.7695	115.253	0.220596	0.0796589	3.04105	0.00235754	0.0401696
RB1	60.7823	57.3048	64.2597	0.162579	0.0884153	3.04093	0.00235849	0.0401696
IL27RA	3.58723	2.58478	4.58969	0.640884	0.291097	3.04087	0.00235895	0.0401696
PRRC2B	171.796	181.825	161.767	-0.16766	0.0731521	-3.03993	0.00236633	0.0402685
EDAR	1.75753	2.41082	1.10424	-0.696823	0.351064	-3.03502	0.0024052	0.0409028
PPIL4	35.547	31.3778	39.7161	0.330594	0.126791	3.03428	0.00241113	0.0409765
SDCBP2	5.50886	3.63712	7.38061	0.853828	0.348244	3.03366	0.00241606	0.04103
SLC7A1	127.344	140.696	113.993	-0.301253	0.0702185	-3.03348	0.00241748	0.04103
RCN1	132.368	123.421	141.316	0.193874	0.0827753	3.03307	0.00242077	0.0410585
TNFRSF6B	0.513714	0.0192385	1.00819	0.978403	1.85014	3.02956	0.00244913	0.0415121
EPHX1	19.9587	24.8727	15.0446	-0.689346	0.185666	-3.02912	0.00245266	0.0415445
LGALS7B	12.7406	19.2586	6.2226	-1.48795	0.556077	-3.02716	0.0024686	0.0417868
CMPK2	10.4439	8.49983	12.388	0.494972	0.221688	3.02696	0.0024703	0.041788
C12orf75	260.921	241.044	280.797	0.219384	0.0957379	3.02491	0.00248706	0.0420437
CITED4	12.9615	9.82073	16.1022	0.660384	0.2525	3.02188	0.00251211	0.0424392
ZNF33B	20.8889	19.2366	22.5413	0.218224	0.141157	3.02155	0.00251487	0.042458
TBC1D23	40.7428	36.9911	44.4945	0.26003	0.109064	3.02056	0.0025231	0.0425689
GPR156	1.20281	0.688248	1.71737	0.686685	0.448075	3.01964	0.00253076	0.0426699
AKR1B10	2.54197	3.96959	1.11436	-1.23291	0.555931	-3.01551	0.00256546	0.0432265
DDN	1.592	2.23596	0.948052	-0.732159	0.393765	-3.01512	0.00256878	0.0432541
RASA4B	2.10375	2.90324	1.30427	-0.760361	0.417758	-3.01281	0.00258841	0.043556
RFC5	63.0647	72.3047	53.8248	-0.419077	0.11001	-3.01199	0.00259543	0.0436226
ATP1B3	283.909	317.841	249.976	-0.345293	0.0783651	-3.01195	0.00259578	0.0436226
CRIP1	251.023	288.876	213.17	-0.436679	0.131305	-3.01031	0.00260979	0.0438295
EEF1A1	4940.84	4532.93	5348.74	0.238708	0.0766681	3.01001	0.00261239	0.0438444
SLC16A9	2.07241	1.39666	2.74817	0.645159	0.335707	3.00871	0.00262362	0.044004
ACTB	4919.03	4605.28	5232.78	0.184251	0.0669674	3.00782	0.00263129	0.044089
USP6NL	21.2666	19.3494	23.1838	0.249058	0.111487	3.00772	0.00263213	0.044089
RDH10	23.3528	27.2704	19.4352	-0.468232	0.131791	-3.00454	0.00265985	0.0445242
FLNA	230.043	208.499	251.588	0.269843	0.0749103	3.00432	0.00266177	0.0445273
RAB32	39.7972	34.0733	45.5213	0.407519	0.159184	3.00308	0.00267263	0.0446798
FAM160A1	27.1197	23.9493	30.2902	0.326712	0.129161	3.00219	0.00268042	0.0447808
ERGIC2	139.127	124.347	153.907	0.305475	0.0986924	3.00125	0.00268871	0.0448901
APCDD1	3.49117	4.81025	2.17209	-0.87317	0.354184	-3.00084	0.00269236	0.0449217
CYP1A1	3.59084	4.49748	2.68421	-0.577415	0.377458	-3.00034	0.00269675	0.0449658
TRIM36	3.54718	2.73923	4.35513	0.518182	0.3308	2.99986	0.00270107	0.0450085
CYP26A1	1.14571	1.99391	0.297512	-1.20628	0.854784	-2.99679	0.00272843	0.0454348
SMIM15	67.2857	60.4417	74.1296	0.290162	0.0968676	2.99249	0.0027671	0.0460489
MALT1	27.0434	25.0554	29.0315	0.204894	0.104576	2.9913	0.00277795	0.0461994
GSDMC	10.5577	8.21292	12.9024	0.59361	0.23635	2.99103	0.00278035	0.0462093
ECI1	33.7969	40.5568	27.0371	-0.567746	0.173688	-2.99083	0.00278221	0.0462103
GULP1	33.7018	30.8633	36.5403	0.236543	0.140514	2.99027	0.00278736	0.0462658
ZBTB7A	24.416	22.3718	26.4601	0.232571	0.102628	2.99003	0.00278951	0.0462716
LST1	0.459338	0.902111	0.016564	-0.9039	1.71697	-2.98759	0.00281187	0.0466123
OTUD4	31.1397	30.5123	31.7671	0.0563329	0.102129	2.98589	0.00282755	0.0468419
TRIP10	54.7102	50.1611	59.2593	0.236135	0.113909	2.98404	0.00284467	0.0470951
B3GNT3	9.62879	7.66108	11.5965	0.540403	0.217634	2.9805	0.00287778	0.0476124
MOCS2	90.2596	82.6466	97.8727	0.241265	0.106455	2.97977	0.00288469	0.047696
EIF2AK4	62.4896	59.0493	65.93	0.156503	0.0830094	2.97957	0.00288656	0.0476961
BNIP3	12.234	10.0628	14.4052	0.477705	0.172698	2.97931	0.00288895	0.0477048
INCENP	119.999	132.107	107.891	-0.289707	0.0996085	-2.97663	0.00291433	0.0480931
PIP4K2A	45.3717	39.7	51.0433	0.354682	0.123526	2.97635	0.00291698	0.0481058
THRAP3	173.153	164.116	182.19	0.149857	0.0736341	2.97318	0.00294734	0.0485752
SMC3	76.9547	72.1108	81.7985	0.17952	0.0824084	2.97156	0.00296292	0.0488007
DNAH5	2.11004	1.52616	2.69391	0.5482	0.324622	2.97122	0.00296618	0.0488229
CD68	12.6721	8.74601	16.5982	0.852545	0.274616	2.96812	0.00299632	0.0492874
NDUFA10	117.652	131.468	103.836	-0.337504	0.0995461	-2.96786	0.0029988	0.0492965
H2AFX	70.4376	80.0062	60.869	-0.388815	0.113563	-2.96703	0.00300689	0.0493977
SYBU	26.2447	31.1502	21.3392	-0.52525	0.149752	-2.96617	0.00301538	0.0495031
ERLEC1	41.2739	37.4211	45.1267	0.263701	0.116933	2.96598	0.00301717	0.0495031
EFR3A	31.3609	29.2371	33.4848	0.189641	0.101565	2.96361	0.00304053	0.049854
CDCA2	44.2336	48.7251	39.7422	-0.28745	0.100074	-2.96342	0.00304244	0.049854
PPP4R1	84.6384	71.3144	97.9624	0.452598	0.10295	2.96228	0.00305374	0.0500072
NRBF2	23.037	19.8148	26.2593	0.389142	0.15866	2.95951	0.00308125	0.0504255
CYP24A1	1.84036	0.840116	2.84059	1.06153	0.582922	2.95913	0.00308507	0.0504558
NECTIN1	94.9128	104.312	85.5135	-0.283672	0.0779703	-2.95843	0.00309209	0.0505383
LPCAT1	13.2162	10.9027	15.5297	0.473767	0.217642	2.95681	0.00310844	0.0507424
HK2	20.5241	19.4067	21.6415	0.14993	0.1085	2.9568	0.00310854	0.0507424
HIST1H2BF	104.491	118.766	90.2168	-0.39284	0.112837	-2.95147	0.00316261	0.0515922
NCK1	59.1762	48.5698	69.7826	0.513932	0.134641	2.94987	0.00317907	0.0518277
HERPUD2	45.8387	40.2001	51.4773	0.349046	0.111839	2.94898	0.00318823	0.0519441
SLC44A4	1.38075	0.685832	2.07567	0.867442	0.549521	2.94865	0.00319165	0.0519557
NUP62	49.8349	46.0084	53.6614	0.217604	0.110289	2.94852	0.003193	0.0519557
ACSL3	184.738	206.139	163.338	-0.333937	0.0774631	-2.94798	0.00319855	0.0519848
C1orf116	102.502	97.8255	107.179	0.130466	0.075548	2.94795	0.00319884	0.0519848
MAP2K1	69.2269	63.4622	74.9917	0.23739	0.102985	2.94702	0.00320855	0.0521094
PPDPF	91.8621	109.516	74.2083	-0.555292	0.152737	-2.9467	0.00321181	0.0521293
SOST	0.972188	1.55973	0.384645	-0.886475	0.670887	-2.9454	0.00322539	0.0523166
KRT6B	0.463977	0.12676	0.801193	0.676773	0.987141	2.94471	0.00323256	0.0523998
PTGS1	3.23288	4.13866	2.32709	-0.627129	0.280917	-2.94444	0.00323537	0.0524121
RTEL1	11.2183	13.1372	9.29936	-0.456942	0.257893	-2.94409	0.00323905	0.052431
NSFL1C	153.633	143.388	163.879	0.191452	0.0912764	2.94394	0.00324063	0.052431
GGT1	9.40228	6.83916	11.9654	0.725896	0.291858	2.94342	0.00324606	0.0524858
HMOX2	150.746	135.273	166.22	0.295249	0.105596	2.94316	0.00324879	0.0524969
IGHE	0.294904	0.579924	0.009883	-0.645667	2.13048	-2.94244	0.00325635	0.0525858
CGN	22.3455	20.7718	23.9191	0.194794	0.117374	2.94151	0.00326613	0.0527105
AC022384.1	2.9909	1.87471	4.1071	0.829086	0.419498	2.9411	0.00327045	0.052747
TOP1	101.503	95.4246	107.581	0.171298	0.0786459	2.93927	0.00328985	0.0530266
STX6	46.6947	43.4128	49.9764	0.198854	0.0941535	2.93621	0.00332252	0.0535195
ZHX2	6.05374	4.90247	7.20502	0.475187	0.219432	2.93461	0.00333969	0.0537623
WWC2	17.9056	16.9279	18.8833	0.149343	0.122436	2.93249	0.00336256	0.0540966
SLC35F2	38.1393	35.5671	40.7115	0.189897	0.110343	2.93198	0.00336805	0.0541366
LMNA	419.018	438.449	399.587	-0.133582	0.0792381	-2.93187	0.00336928	0.0541366
HADH	35.1688	40.6925	29.6452	-0.444127	0.131056	-2.93097	0.00337901	0.0542589
DAP3	292.969	278.677	307.26	0.140388	0.0852549	2.92659	0.00342702	0.054981
STYK1	6.7067	5.10881	8.3046	0.607052	0.296902	2.92648	0.00342827	0.054981
CTTN	272.606	256.568	288.644	0.169325	0.0742021	2.92521	0.00344222	0.0551702
RNF169	23.063	21.3752	24.7508	0.202719	0.0924054	2.92438	0.00345148	0.0552841
WBP4	19.32	16.8869	21.753	0.347149	0.145019	2.92199	0.00347803	0.0556746
CSRP1	141.687	130.274	153.1	0.231291	0.0854294	2.92124	0.00348645	0.0557577
SERTAD2	26.7999	24.6535	28.9464	0.223227	0.101669	2.92084	0.00349089	0.0557577
UTRN	58.0258	63.4633	52.5881	-0.266565	0.0899223	-2.92076	0.00349177	0.0557577
TYSND1	16.9617	19.7054	14.2181	-0.444219	0.142804	-2.92066	0.00349292	0.0557577
PARP4	72.8335	69.2352	76.4318	0.140733	0.0784681	2.92055	0.00349411	0.0557577
SLC9B2	5.77817	3.72003	7.83631	0.90465	0.377904	2.91922	0.00350905	0.0559613
FAM46B	5.45284	7.00742	3.89826	-0.709069	0.270878	-2.91826	0.00351988	0.0560991
CD99	57.4633	51.1282	63.7985	0.313895	0.140473	2.91723	0.00353151	0.0562495
HELZ2	9.20951	6.78883	11.6302	0.6974	0.161041	2.91573	0.00354855	0.0564858
RTTN	37.3605	44.7589	29.9621	-0.563553	0.114916	-2.90987	0.00361579	0.0575205
AC244669.1	42.4292	31.6456	53.2129	0.73175	0.272406	2.90843	0.00363248	0.0577502
PITPNM2	9.46834	11.6565	7.28012	-0.61216	0.182859	-2.90716	0.00364727	0.0579493
SLC20A1	210.727	198.786	222.669	0.162917	0.0786752	2.90651	0.00365486	0.058034
UCHL3	203.04	186.303	219.778	0.237223	0.102294	2.90621	0.00365835	0.0580534
TONSL	4.70674	5.77987	3.63361	-0.54912	0.199416	-2.90589	0.00366214	0.0580775
LPXN	6.25874	4.09425	8.42323	0.887352	0.35179	2.9021	0.0037067	0.058721
KIF11	67.534	74.4257	60.6424	-0.291132	0.0837428	-2.90205	0.0037073	0.058721
CASP1	47.7851	40.6204	54.9499	0.426846	0.156399	2.89954	0.0037371	0.0591565
ALG2	51.1643	46.0294	56.2993	0.284957	0.11848	2.89933	0.00373962	0.0591599
GALNT6	20.2342	17.3746	23.0938	0.390945	0.140414	2.8981	0.00375436	0.0593565
MIB1	32.682	36.1198	29.2441	-0.29554	0.0870784	-2.89762	0.00376009	0.0594103
TECR	90.0626	101.347	78.7786	-0.359388	0.117484	-2.89679	0.00377003	0.0595307
HIST1H2BJ	460.014	514.655	405.373	-0.343602	0.104814	-2.89576	0.00378242	0.0596895
RACGAP1	140.033	149.45	130.616	-0.192949	0.082951	-2.89509	0.00379056	0.0597811
KLHL21	19.8107	17.6491	21.9723	0.300792	0.138542	2.89471	0.00379509	0.0598159
TLR1	0.58662	0.190939	0.982302	0.735078	0.986666	2.893	0.00381576	0.0601047
PRODH	2.87931	3.7953	1.96331	-0.694413	0.422258	-2.89211	0.00382668	0.0602044
TMED5	49.9647	44.8361	55.0934	0.291347	0.100861	2.8921	0.00382679	0.0602044
PRELID3B	159.353	148.379	170.327	0.19778	0.0892315	2.89049	0.00384636	0.0604752
SSBP3	55.2586	62.6823	47.8349	-0.382983	0.127452	-2.8903	0.00384879	0.0604762
ERF	38.1339	45.7281	30.5396	-0.567126	0.157592	-2.89003	0.00385208	0.0604908
RNF227	4.9058	3.72096	6.09065	0.586838	0.264232	2.88927	0.00386135	0.0605993
ANXA9	5.59829	7.37627	3.82031	-0.797181	0.307386	-2.88787	0.00387857	0.0608323
ALAS1	33.5309	29.9857	37.0761	0.297281	0.128469	2.88743	0.00388402	0.0608805
SRP54	71.9755	67.1097	76.8413	0.192677	0.103189	2.88656	0.00389473	0.061011
CPNE8	7.737	6.43719	9.03681	0.432471	0.221496	2.88318	0.00393677	0.0616149
COPS2	182.708	169.8	195.615	0.203065	0.0834977	2.88308	0.00393809	0.0616149
EXOC6	23.9076	20.8392	26.976	0.35727	0.131299	2.88177	0.00395446	0.0618333
RAP2B	41.1564	38.6771	43.6356	0.169885	0.0806505	2.8811	0.00396284	0.0619017
REEP4	31.1475	36.5923	25.7028	-0.493449	0.149612	-2.88075	0.00396736	0.0619017
RNF43	6.67575	5.19965	8.15185	0.561877	0.194026	2.88071	0.00396785	0.0619017
KLC1	113.125	105.376	120.874	0.196224	0.0916503	2.88066	0.00396849	0.0619017
TK1	92.5398	102.455	82.6242	-0.307018	0.108762	-2.8786	0.00399448	0.0622692
USP14	88.4789	82.5453	94.4125	0.19162	0.0901347	2.87784	0.00400407	0.0623808
TGIF1	37.718	32.2722	43.1638	0.408549	0.159507	2.8772	0.00401225	0.0624533
SGTB	13.7254	11.4861	15.9648	0.442217	0.144368	2.87709	0.0040136	0.0624533
SREK1IP1	16.7377	15.087	18.3883	0.269287	0.132575	2.87591	0.0040286	0.0626444
PSMC2	334.398	310.091	358.705	0.209478	0.0818586	2.87574	0.00403077	0.0626444
ETFB	70.7661	81.6246	59.9075	-0.439951	0.136	-2.87508	0.0040392	0.0627374
LGALS3	248.303	276.063	220.543	-0.322624	0.0932693	-2.87429	0.00404937	0.0628572
ATP5F1B	793.892	874.801	712.984	-0.294712	0.0813987	-2.87279	0.00406865	0.0631183
MTURN	4.40062	3.74927	5.05196	0.349694	0.241568	2.87232	0.00407469	0.0631737
NSFP1	5.43925	3.67397	7.20453	0.811771	0.395637	2.872	0.00407881	0.0631993
VARS	9.21688	10.9767	7.45707	-0.502001	0.173674	-2.87127	0.00408831	0.0633083
ABAT	6.98703	8.29902	5.67505	-0.4783	0.217921	-2.87051	0.00409814	0.0634222
SMO	11.5711	13.7316	9.41057	-0.500864	0.181627	-2.86973	0.00410819	0.0635063
ACOX1	30.1941	27.1582	33.23	0.281704	0.112454	2.86971	0.00410853	0.0635063
ERP44	48.4919	45.2867	51.6972	0.187127	0.0871392	2.86912	0.0041162	0.0635848
CCNB1	318.906	351.459	286.353	-0.294629	0.0782258	-2.86893	0.00411857	0.0635848
SEC14L1	61.3252	56.6603	65.99	0.216368	0.105275	2.86779	0.00413349	0.0637768
CASP8AP2	19.3219	17.9019	20.7418	0.201936	0.112878	2.8673	0.00413993	0.0638377
TM7SF3	56.8984	64.2462	49.5507	-0.368162	0.109993	-2.86652	0.00415007	0.0639555
OLA1	249.745	228.184	271.307	0.248731	0.0823365	2.86485	0.00417213	0.0641886
CDK1	172.493	190.501	154.484	-0.300586	0.0873871	-2.86467	0.0041745	0.0641886
TAF1D	356.272	327.952	384.591	0.229192	0.0782159	2.86461	0.00417518	0.0641886
SERINC3	62.659	59.107	66.2111	0.161165	0.0894882	2.86461	0.00417521	0.0641886
SIPA1L2	1.47886	1.88699	1.07072	-0.479436	0.342004	-2.86327	0.00419289	0.0644148
OSBPL3	78.1077	73.1642	83.0512	0.180545	0.08745	2.86312	0.00419495	0.0644148
ITPRIP	7.92496	6.93313	8.91679	0.321983	0.158011	2.86145	0.00421708	0.0647158
ARL6IP1	297.171	327.034	267.307	-0.289966	0.0743929	-2.86008	0.00423535	0.0649258
HPDL	3.67102	5.13066	2.21138	-0.932847	0.403509	-2.86002	0.00423616	0.0649258
ANKRD50	6.21462	7.05675	5.37248	-0.338344	0.141478	-2.85832	0.00425897	0.0651671
EPHA2	25.6181	23.9587	27.2776	0.180117	0.124019	2.8583	0.00425921	0.0651671
PSMD12	224.321	207.375	241.268	0.217419	0.0772808	2.8571	0.00427525	0.0653271
EXPH5	23.8869	27.2919	20.482	-0.397264	0.101148	-2.85708	0.00427562	0.0653271
PTK6	12.2283	10.3995	14.057	0.401461	0.170312	2.85691	0.0042779	0.0653271
SHISA5	37.5851	42.5009	32.6692	-0.369614	0.13853	-2.85676	0.00427986	0.0653271
SSH1	40.2943	38.3753	42.2133	0.134183	0.08829	2.85578	0.00429318	0.0654914
FAM162A	62.5945	72.4107	52.7781	-0.448971	0.146282	-2.85509	0.0043024	0.0655931
STEAP4	14.1015	12.1851	16.018	0.368163	0.129344	2.85428	0.00431342	0.065722
HMGB2	181.602	200.469	162.736	-0.299187	0.0927897	-2.85168	0.00434884	0.0662222
ZDHHC23	20.8358	17.7895	23.8821	0.405182	0.12496	2.85124	0.00435496	0.0662761
SNCG	72.857	86.3507	59.3633	-0.533148	0.16197	-2.84926	0.00438217	0.0666476
PATJ	54.819	55.4826	54.1555	-0.0343005	0.0894415	2.84899	0.00438577	0.0666476
MRPL24	160.277	179.736	140.817	-0.349848	0.118092	-2.84889	0.00438717	0.0666476
COMT	127.636	142.745	112.528	-0.340475	0.112434	-2.84558	0.00443309	0.0673052
SMN1	13.4412	15.6645	11.218	-0.447776	0.268786	-2.8443	0.00445094	0.0675362
NUMA1	88.2043	98.349	78.0597	-0.329564	0.0810735	-2.844	0.00445505	0.0675586
NBPF15	26.4022	24.4687	28.3357	0.203935	0.12208	2.84194	0.00448396	0.0679567
FAM167A	1.64932	1.09357	2.20507	0.61439	0.371195	2.83954	0.00451783	0.0684296
DDAH2	0.201441	0	0.402882	0.488394	2.21476	2.83928	0.00452157	0.0684459
MIOS	57.7354	53.4858	61.9851	0.209129	0.105505	2.83556	0.0045745	0.0692062
NDUFS8	90.1135	105.384	74.8427	-0.488202	0.143205	-2.83515	0.00458049	0.0692559
NLK	12.6883	11.6682	13.7085	0.215444	0.158455	2.83406	0.00459613	0.0694514
ARCN1	166.915	154.345	179.485	0.216398	0.0750913	2.83252	0.00461831	0.0697454
DDX52	43.8294	41.7351	45.9237	0.134895	0.0980746	2.83132	0.00463557	0.0699648
RAB29	24.6174	21.9892	27.2456	0.297067	0.140745	2.83052	0.0046472	0.0700991
DUSP11	58.8909	52.1611	65.6208	0.325603	0.122487	2.82918	0.00466671	0.070352
MGAT2	23.9152	21.0993	26.7311	0.327507	0.14095	2.82793	0.00468502	0.0705832
FAM83F	5.48641	5.98617	4.98665	-0.222754	0.144695	-2.82761	0.0046897	0.0705832
LRP12	13.5597	11.731	15.3884	0.364324	0.147377	2.82757	0.00469031	0.0705832
SFR1	33.0602	28.2125	37.9079	0.41348	0.161726	2.82542	0.00472183	0.0710159
LHFPL6	16.9442	14.3583	19.5299	0.418707	0.175814	2.82454	0.00473481	0.0711694
EIF3M	566.917	529.408	604.427	0.190849	0.0769528	2.81948	0.00481017	0.0722596
ANKRD22	23.8569	20.3245	27.3892	0.412827	0.171094	2.81815	0.00483007	0.0725161
CEP290	18.6289	18.538	18.7197	0.0133511	0.112547	2.81768	0.00483714	0.0725798
HIST1H2AC	99.8989	111.712	88.0863	-0.33936	0.100632	-2.81632	0.00485775	0.0728463
SPART	107.19	98.1864	116.194	0.240685	0.0900821	2.81577	0.00486602	0.0729276
GABRQ	0.5303	0.784524	0.276075	-0.483827	0.514282	-2.81534	0.00487249	0.072982
SCFD1	72.3208	66.4026	78.239	0.233408	0.110375	2.81448	0.00488569	0.073137
C22orf15	0.672115	1.07807	0.266157	-0.714789	1.45037	-2.81413	0.00489093	0.0731726
UQCRC2	356.709	394.008	319.411	-0.301958	0.0848745	-2.81241	0.00491711	0.0735214
MAPK15	0.484227	0.968454	0	-0.977063	2.18563	-2.81127	0.00493458	0.0737227
PRKACA	44.4511	50.0572	38.845	-0.357716	0.112746	-2.81116	0.00493632	0.0737227
CEBPZ	103.864	97.1868	110.541	0.183974	0.0867415	2.81088	0.00494062	0.0737439
PIK3C2A	38.7042	36.762	40.6463	0.141255	0.0924483	2.81021	0.00495084	0.0738534
STAG2	85.9934	81.8982	90.0887	0.135931	0.0828596	2.80864	0.00497515	0.0741728
PPP4R2	30.9382	28.7621	33.1143	0.1969	0.111148	2.80746	0.00499339	0.0744015
GTPBP4	115.346	113.025	117.667	0.0575749	0.0845	2.80687	0.00500247	0.0744934
FAM171B	8.36424	9.72301	7.00547	-0.421652	0.147355	-2.80306	0.00506199	0.0753271
ACLY	132.099	126.611	137.586	0.119029	0.0789989	2.80278	0.00506637	0.0753271
ZC3H11A	103.778	98.8239	108.733	0.13654	0.0770605	2.80273	0.00506727	0.0753271
CD70	10.4691	7.47192	13.4663	0.771931	0.348052	2.80155	0.00508578	0.0755585
RALGDS	14.2894	16.3679	12.2108	-0.394705	0.161794	-2.80128	0.00509006	0.0755782
STC2	15.4248	11.1274	19.7222	0.772907	0.17584	2.80087	0.00509651	0.0756302
HIST1H2AD	231.19	269.855	192.525	-0.484997	0.154372	-2.80012	0.00510843	0.0757632
METTL9	2.32872	3.3045	1.35294	-0.871383	0.333945	-2.799	0.00512609	0.0759812
HPS5	31.2486	29.2459	33.2513	0.179419	0.109502	2.79646	0.00516655	0.0765366
FGF14	1.29262	0.980013	1.60523	0.395904	0.25521	2.79595	0.00517466	0.0766125
HIC2	5.07348	5.98778	4.15918	-0.43769	0.167826	-2.79573	0.00517821	0.0766208
LAMP3	1.81428	1.07086	2.5577	0.780711	0.403272	2.7948	0.00519311	0.0767958
PGAP1	6.14993	7.26628	5.03358	-0.454223	0.185936	-2.79462	0.00519603	0.0767958
SLC38A2	499.498	431.835	567.161	0.392483	0.165523	2.79426	0.00520184	0.0768373
JPH1	13.8861	12.3466	15.4257	0.299488	0.141031	2.79372	0.00521055	0.076887
TNPO1	176.053	169.812	182.294	0.101746	0.0737806	2.79365	0.00521167	0.076887
SPHK1	20.6398	17.5426	23.7371	0.415833	0.17383	2.79349	0.00521421	0.076887
DCXR	34.5305	41.162	27.8991	-0.544919	0.209916	-2.79323	0.00521851	0.0769062
TEP1	17.8355	13.9228	21.7481	0.608236	0.131248	2.79095	0.00525536	0.0774048
HIST1H3J	192.161	227.131	157.19	-0.5282	0.170067	-2.79047	0.00526314	0.0774748
TANC2	16.6633	20.1504	13.1761	-0.577233	0.120456	-2.78835	0.0052977	0.0779389
ASPH	193.678	185.159	202.198	0.126355	0.0762765	2.78667	0.0053252	0.0782985
CAMSAP2	61.0221	56.5311	65.513	0.209294	0.0805138	2.78572	0.00534093	0.0784398
ZSCAN31	6.19721	9.11693	3.2775	-1.24193	0.397523	-2.7854	0.00534609	0.0784706
RPS2	2105.45	2290.14	1920.77	-0.253637	0.0692378	-2.78472	0.00535741	0.0785917
RBM19	34.8184	32.9517	36.6851	0.150513	0.107278	2.78394	0.00537033	0.0787361
SLC25A10	12.3193	15.4244	9.21432	-0.685243	0.22741	-2.78351	0.00537743	0.0787952
GABRA3	2.7822	3.78136	1.78306	-0.78075	0.343343	-2.78299	0.00538612	0.0788321
RNF13	80.6926	77.0743	84.3108	0.12788	0.107341	2.78296	0.00538654	0.0788321
HEXB	188.794	178.785	198.804	0.152309	0.0850903	2.7828	0.00538918	0.0788321
STX7	33.096	29.8748	36.3171	0.273407	0.115166	2.78242	0.00539554	0.0788802
RIN1	9.75754	11.4335	8.08163	-0.453204	0.213218	-2.78133	0.00541367	0.0791001
GPSM2	50.8506	58.1466	43.5545	-0.408722	0.102396	-2.78099	0.00541927	0.0791368
MAP3K4	47.3085	59.5892	35.0277	-0.749957	0.111717	-2.78039	0.00542931	0.0792382
ANXA7	150.12	139.814	160.426	0.197087	0.0927167	2.7801	0.00543416	0.0792426
DAB2IP	21.7911	24.2832	19.2991	-0.31677	0.106498	-2.78001	0.00543579	0.0792426
CSNK1G3	42.6269	39.5603	45.6934	0.20315	0.113843	2.77808	0.0054682	0.0796697
NEU1	7.96582	6.4791	9.45253	0.482916	0.228938	2.77781	0.00547268	0.0796897
RSU1	54.4233	48.2513	60.5952	0.322656	0.103665	2.77692	0.0054877	0.079863
MTRF1L	37.3879	34.5265	40.2494	0.215478	0.110097	2.77638	0.00549681	0.0799502
SH3GLB2	56.7766	62.7952	50.758	-0.301665	0.12176	-2.77488	0.00552212	0.0802728
SLC27A4	26.8813	30.6961	23.0664	-0.397282	0.128832	-2.77445	0.00552948	0.0803342
FPGS	62.4512	55.2611	69.6412	0.328373	0.127556	2.77005	0.00560483	0.0813828
ABCA13	0.528602	0.376433	0.680771	0.28819	0.37545	2.76865	0.00562893	0.0816727
MREG	27.142	25.1564	29.1276	0.203924	0.148736	2.76852	0.00563117	0.0816727
TIPARP	55.7933	51.4349	60.1517	0.221866	0.0945494	2.76625	0.00567044	0.0821958
CCDC50	93.6303	88.558	98.7026	0.154807	0.0847831	2.76459	0.00569947	0.0825698
NDST1	39.8877	45.0245	34.751	-0.364422	0.0876643	-2.76322	0.00572342	0.08287
SLC38A1	173.264	164.002	182.526	0.153497	0.0707717	2.76218	0.00574166	0.0830871
ERICH1	36.8549	33.8712	39.8387	0.227901	0.157614	2.76135	0.00575629	0.0832517
MOB4	44.5517	39.7359	49.3674	0.306191	0.130827	2.75995	0.00578104	0.0835314
MAPRE2	59.3802	52.9188	65.8416	0.309958	0.106063	2.75989	0.00578214	0.0835314
DCUN1D1	64.2349	60.0146	68.4552	0.186927	0.0916605	2.75968	0.00578583	0.0835376
DDR1	58.1804	55.3331	61.0277	0.13893	0.102569	2.75894	0.00579888	0.0836789
SERPINH1	90.3103	100.872	79.7484	-0.335256	0.0963613	-2.75864	0.00580432	0.0837102
AL162417.1	0.086383	0.172766	0	-0.229915	2.20859	-2.75775	0.00582001	0.0838893
CCDC85A	4.07158	5.07371	3.06944	-0.577745	0.240398	-2.7572	0.00582982	0.0839834
MAP1LC3B	51.992	48.2255	55.7587	0.205436	0.10564	2.7547	0.00587468	0.0845821
DEGS1	54.3146	49.8668	58.7624	0.232514	0.115167	2.75437	0.00588053	0.0846189
EGFL8	0.133583	0.267167	0	-0.341607	2.20947	-2.75086	0.00594387	0.0854479
PLPP2	20.227	23.7648	16.6892	-0.485425	0.183747	-2.75081	0.00594481	0.0854479
PAN2	17.9401	22.4116	13.4686	-0.694298	0.16829	-2.74996	0.00596024	0.0856217
PPM1L	1.66421	2.06975	1.25867	-0.442645	0.270829	-2.74879	0.00598165	0.0858811
IFT122	22.2156	26.6957	17.7354	-0.563895	0.191445	-2.74815	0.00599322	0.085999
ZNF638	103.943	101.01	106.876	0.0806496	0.0852099	2.745	0.00605108	0.0867807
MPPED1	2.75638	4.04582	1.46694	-1.03236	0.403951	-2.74454	0.0060596	0.0868542
ARHGAP12	40.5052	35.9304	45.0799	0.31933	0.104318	2.74419	0.00606598	0.0868971
AGFG2	13.3788	16.0827	10.6748	-0.549128	0.181448	-2.74302	0.00608765	0.0871589
SPC24	29.6043	36.5079	22.7006	-0.662271	0.15485	-2.74207	0.00610533	0.0873631
TRIP11	32.2087	31.0566	33.3608	0.10014	0.101399	2.74137	0.00611832	0.0875002
CROT	40.763	47.6388	33.8873	-0.479409	0.129377	-2.73917	0.00615942	0.0880388
C15orf41	55.6331	64.4084	46.8578	-0.45072	0.123591	-2.73898	0.00616294	0.08804
CTU2	9.67516	11.5411	7.80928	-0.509563	0.277288	-2.73819	0.00617785	0.0882038
PLEKHA5	31.3618	28.7583	33.9653	0.232632	0.10804	2.73796	0.00618222	0.0882171
TJP1	76.6392	72.8131	80.4654	0.14231	0.074921	2.73713	0.00619772	0.088389
SS18	130.954	127.763	134.145	0.0697898	0.0843955	2.73657	0.00620843	0.0884926
LRRC59	156.107	148.119	164.096	0.14685	0.0791216	2.73554	0.00622778	0.088719
TKFC	19.219	22.5099	15.9281	-0.473851	0.181067	-2.73463	0.00624505	0.0889156
GALM	9.11967	10.314	7.92532	-0.342137	0.263802	-2.73186	0.00629786	0.0895927
HSPBP1	33.0583	39.2403	26.8761	-0.529612	0.156276	-2.73177	0.00629959	0.0895927
RHBDD2	54.622	63.0644	46.1797	-0.441358	0.150602	-2.73083	0.0063176	0.0897989
TMX3	64.7879	58.7035	70.8723	0.267621	0.103497	2.7295	0.00634314	0.0901075
ACSS2	35.7349	31.6519	39.818	0.322039	0.138225	2.72933	0.00634634	0.0901075
ODC1	45.0767	50.7621	39.3914	-0.357851	0.120956	-2.72799	0.00637218	0.0904242
FMNL2	16.7432	15.4727	18.0138	0.20697	0.121983	2.7265	0.00640107	0.090784
YWHAG	271.356	257.777	284.936	0.143983	0.0754481	2.72521	0.00642605	0.0910143
COX5B	146.863	167.632	126.094	-0.407992	0.127251	-2.72513	0.0064276	0.0910143
RAD54L	19.5827	21.5124	17.6531	-0.271308	0.163553	-2.72452	0.00643942	0.0910828
C7orf50	61.8812	68.2356	55.5267	-0.29258	0.146435	-2.7245	0.00643991	0.0910828
LPP	29.8248	32.1956	27.4539	-0.222363	0.101432	-2.72398	0.00645	0.0911752
SGK1	20.6128	17.7524	23.4732	0.384124	0.154055	2.72346	0.00646016	0.0912233
CNTRL	33.9318	38.2925	29.5711	-0.362085	0.102806	-2.72344	0.00646053	0.0912233
KIAA1147	11.6558	10.5945	12.7172	0.242557	0.116375	2.72297	0.00646987	0.0912809
NT5C3A	116.058	108.138	123.977	0.195502	0.100674	2.72287	0.00647172	0.0912809
MANF	60.3304	53.0583	67.6024	0.343741	0.147357	2.7204	0.00652029	0.0918598
TRIM28	175.292	188.345	162.238	-0.214036	0.0958228	-2.72035	0.0065213	0.0918598
CXCL5	0.351085	0.089621	0.612549	0.565517	1.03979	2.72024	0.00652352	0.0918598
AURKA	94.8946	105.846	83.9432	-0.330963	0.0959412	-2.71949	0.00653824	0.0920085
TPD52L2	93.2969	86.9365	99.6572	0.194915	0.0929266	2.71926	0.00654283	0.0920085
ATP1B1	122.025	112.038	132.012	0.234749	0.0870399	2.71916	0.00654485	0.0920085
CFAP57	3.75614	3.01959	4.4927	0.450469	0.269922	2.71841	0.00655965	0.0921659
AHNAK2	65.2374	67.5101	62.9646	-0.099043	0.0807055	-2.71796	0.00656868	0.0921935
DLL1	8.15798	6.61383	9.70214	0.491206	0.217643	2.71795	0.0065688	0.0921935
RRAS	18.2289	14.7586	21.6992	0.526502	0.245765	2.71691	0.00658936	0.0924313
CDKN2C	9.01548	11.0554	6.97556	-0.596021	0.239835	-2.71656	0.00659638	0.0924792
RNF26	27.8571	31.6486	24.0657	-0.381309	0.123238	-2.71578	0.00661192	0.0926464
KIF2C	51.9151	58.3411	45.4892	-0.352136	0.110058	-2.71448	0.00663801	0.0929612
KDM7A	2.82378	2.2506	3.39697	0.435808	0.206177	2.71393	0.00664898	0.0930639
WDR47	27.2132	25.1055	29.3209	0.215964	0.112639	2.71328	0.0066621	0.0931461
SERTAD4	18.0437	15.2353	20.8522	0.428649	0.146396	2.71328	0.00666212	0.0931461
SNAPC1	15.0277	13.0375	17.0179	0.360144	0.164254	2.71297	0.00666835	0.0931823
DLGAP4	33.6747	30.7087	36.6407	0.247412	0.119646	2.71271	0.00667346	0.0932014
PTPRU	18.2278	19.7968	16.6588	-0.235974	0.124587	-2.71254	0.00667698	0.0932014
SLC39A10	15.5775	13.5452	17.6097	0.355511	0.132857	2.71187	0.0066905	0.0933392
CXCL3	0.818947	0.302259	1.33563	0.842798	1.12016	2.71101	0.00670787	0.0935306
SMIM10L1	9.42284	8.27243	10.5732	0.319773	0.150288	2.70612	0.00680741	0.0948669
CRABP2	141.445	158.558	124.332	-0.34832	0.107339	-2.70136	0.00690567	0.0961329
IVNS1ABP	75.1121	81.3457	68.8786	-0.236844	0.0892659	-2.70136	0.00690575	0.0961329
AKT3	38.4455	31.4425	45.4487	0.517754	0.109453	2.70108	0.00691151	0.0961608
ZC3H7B	18.0551	16.5674	19.5429	0.225743	0.1103	2.69882	0.00695852	0.0967623
PKP3	71.8749	78.5351	65.2147	-0.264439	0.10571	-2.69837	0.00696794	0.0968274
FAM214B	2.61585	2.04718	3.18451	0.45758	0.354635	2.69813	0.00697304	0.0968274
FAM3C	77.0431	71.387	82.6992	0.209482	0.101145	2.69806	0.00697454	0.0968274
ZMYM3	8.12654	9.23586	7.01722	-0.352459	0.161589	-2.69727	0.00699116	0.0970057
SPRR2F	0.97402	0.093615	1.85442	1.3841	1.75107	2.69653	0.00700657	0.0971669
FOXM1	118.75	131.431	106.069	-0.306712	0.0819001	-2.69616	0.00701433	0.0971983
BRD4	61.4265	56.6289	66.2242	0.222188	0.088179	2.69606	0.00701642	0.0971983
POMP	214.111	199.309	228.913	0.198864	0.0967865	2.69587	0.0070206	0.0972037
LRCH1	15.4392	14.4329	16.4457	0.176863	0.137222	2.69544	0.00702961	0.0972759
GNPTAB	42.176	41.1148	43.2371	0.0709311	0.0941444	2.69468	0.00704569	0.0974458
APLF	3.10947	2.47719	3.74175	0.447499	0.305386	2.69228	0.00709659	0.0980439
GFOD1	8.50955	7.95392	9.06518	0.168782	0.135136	2.69183	0.00710613	0.0981227
GNAI2	59.4873	54.8507	64.1239	0.22161	0.103014	2.6916	0.00711112	0.0981388
PGM3	24.8863	22.0852	27.6873	0.313444	0.130636	2.69013	0.00714238	0.0985172
STARD13	22.8839	21.3035	24.4643	0.191209	0.132114	2.68807	0.00718661	0.0990739
ACAT2	47.1331	41.1133	53.1529	0.36276	0.110536	2.68628	0.00722523	0.0995527
FGD3	2.18588	3.04072	1.33105	-0.793632	0.470425	-2.68375	0.00728018	0.100215
GAB2	11.5157	10.2489	12.7826	0.293059	0.137197	2.68371	0.00728109	0.100215
WDR44	17.5409	16.064	19.0177	0.230324	0.126742	2.68294	0.00729783	0.100391
RBBP8NL	1.07884	1.60539	0.552297	-0.747094	0.549999	-2.68146	0.00733018	0.100782
HSPB1	250.551	279.961	221.141	-0.338892	0.0948321	-2.67982	0.00736611	0.10116
CLOCK	42.7497	39.7358	45.7638	0.199095	0.0890615	2.67971	0.00736864	0.10116
PAK2	83.7113	79.8204	87.6022	0.132624	0.0773507	2.67959	0.00737131	0.10116
GARS	237.264	221.868	252.661	0.186713	0.0870929	2.67949	0.00737343	0.10116
DGCR2	42.221	47.8147	36.6272	-0.375541	0.106672	-2.6788	0.0073886	0.101314
LRRC75A	53.6896	59.9164	47.4629	-0.32995	0.105419	-2.6778	0.00741075	0.101482
NDUFS3	125.413	140.964	109.862	-0.356754	0.131776	-2.67758	0.00741572	0.101482
STAT1	75.5979	71.3528	79.8431	0.160076	0.0898282	2.67755	0.00741624	0.101482
FJX1	21.7117	17.8783	25.5452	0.491729	0.176524	2.67753	0.00741675	0.101482
GGH	61.2664	55.5297	67.0031	0.26659	0.131389	2.67697	0.00742905	0.101596
CDC42SE2	43.7584	48.2719	39.2448	-0.291964	0.100335	-2.67636	0.00744268	0.101729
SAA4	1.24629	0.235703	2.25689	1.39816	1.22655	2.67564	0.00745872	0.101893
ATP5MC1	151.265	173.298	129.232	-0.420482	0.138849	-2.67524	0.00746754	0.10196
MACO1	15.7867	14.0537	17.5197	0.298946	0.134445	2.67349	0.00750661	0.102438
EPHX2	24.6387	27.7015	21.5759	-0.346339	0.227622	-2.67303	0.007517	0.102526
DDX21	178.77	170.622	186.918	0.130869	0.0717944	2.67105	0.00756139	0.103076
RNF149	67.6961	64.612	70.7802	0.129625	0.113163	2.66928	0.00760151	0.103568
NPIPB4	145.19	162.159	128.222	-0.336422	0.153901	-2.66901	0.00760756	0.103595
TMEM131L	6.65261	8.28322	5.022	-0.624385	0.212531	-2.66829	0.00762375	0.103761
VPS37A	44.3603	40.8447	47.876	0.224085	0.124322	2.66704	0.00765225	0.104093
SNTB2	22.5475	25.0526	20.0424	-0.308125	0.0889567	-2.66667	0.00766068	0.104153
ARL8B	48.3216	45.7043	50.9389	0.153259	0.111353	2.66613	0.00767291	0.104264
SPTBN2	5.81674	7.44236	4.19112	-0.701601	0.207346	-2.66555	0.00768635	0.104391
TOM1L1	67.6048	62.4132	72.7964	0.218768	0.11327	2.66511	0.00769627	0.10447
BMF	1.45288	1.84081	1.06496	-0.460185	0.526851	-2.66463	0.00770732	0.104539
LCE1C	1.06016	0.10148	2.01885	1.45456	1.63542	2.66452	0.00770973	0.104539
ACTRT3	5.13658	3.82747	6.44569	0.625137	0.303702	2.66436	0.00771359	0.104539
OAT	277.008	258.389	295.627	0.19353	0.0880022	2.66413	0.00771881	0.104555
CDR2L	21.0234	23.8488	18.1979	-0.372228	0.124229	-2.66358	0.0077315	0.104671
S100A8	3.66803	1.20883	6.12723	1.69006	0.900624	2.66286	0.00774802	0.10484
CORO2A	14.1358	16.0058	12.2659	-0.35831	0.122579	-2.66248	0.0077568	0.104903
SMARCA1	18.1519	16.3696	19.9342	0.269305	0.127996	2.66165	0.00777581	0.105105
ADGRG6	35.024	33.962	36.086	0.085089	0.0973954	2.66006	0.00781278	0.105549
MTHFD2	96.6339	88.189	105.079	0.250199	0.105871	2.65973	0.00782043	0.10555
PLEKHF2	28.5565	32.5078	24.6052	-0.388058	0.129212	-2.6597	0.00782111	0.10555
SLC39A13	9.50461	7.80326	11.206	0.471475	0.22591	2.65928	0.00783067	0.105623
ABHD4	48.0524	56.5266	39.5781	-0.503529	0.132379	-2.65904	0.00783646	0.105646
FLOT1	22.785	26.1212	19.4489	-0.407401	0.189026	-2.65814	0.00785725	0.10587
LAPTM4B	92.74	102.198	83.2825	-0.292104	0.0886362	-2.65729	0.00787715	0.106083
GCSHP5	30.624	39.6723	21.5756	-0.849279	0.307008	-2.65476	0.00793646	0.106825
RIPK3	4.18511	2.65126	5.71896	0.879843	0.407911	2.65415	0.00795088	0.106958
AP1AR	16.5597	15.3814	17.7379	0.193896	0.170341	2.65398	0.00795481	0.106958
PTK7	21.7266	24.076	19.3772	-0.299355	0.132926	-2.65381	0.00795885	0.106958
CCNB2	115.746	128.736	102.757	-0.322372	0.096016	-2.65353	0.00796543	0.106986
HSD17B12	157.064	145.424	168.704	0.212864	0.0859099	2.65337	0.00796926	0.106986
BX276092.5	8.19054	1.44464	14.9364	2.70463	1.55224	2.65216	0.00799793	0.107315
SPATS2L	214.131	195.754	232.508	0.247079	0.0807036	2.64915	0.00806946	0.108218
MUC20	2.29093	4.29571	0.286156	-2.04176	1.00773	-2.64891	0.0080751	0.108237
DUSP1	4.20894	2.98692	5.43095	0.68976	0.34273	2.64871	0.00808005	0.108246
SNAPC4	14.8026	11.8951	17.7102	0.537002	0.17191	2.64805	0.00809572	0.108318
CASP3	33.5924	30.5313	36.6536	0.255999	0.128977	2.64802	0.00809653	0.108318
IFT172	17.7327	19.4728	15.9925	-0.268806	0.167628	-2.64795	0.00809807	0.108318
TRIM6-TRIM34	0.090474	0.180948	0	-0.239945	2.25641	-2.64663	0.00812984	0.108686
SPRED1	18.3781	18.5656	18.1906	-0.0279196	0.115147	2.64583	0.00814902	0.108886
PARP12	36.8376	33.1544	40.5208	0.281763	0.14587	2.6448	0.00817402	0.109089
POLD2	96.1153	107.832	84.3985	-0.34982	0.10737	-2.64455	0.00818003	0.109089
ST3GAL6	17.5808	13.9403	21.2213	0.572731	0.262426	2.64447	0.00818179	0.109089
DDX3X	251.745	237.707	265.784	0.160429	0.069853	2.64435	0.0081848	0.109089
GLRX	24.229	29.2882	19.1697	-0.586566	0.204075	-2.64432	0.00818551	0.109089
DNAJB4	17.0136	19.3417	14.6857	-0.374991	0.175759	-2.64316	0.00821352	0.109405
MPP2	2.43806	3.18717	1.68894	-0.638937	0.307084	-2.64171	0.00824876	0.109768
PARD6B	17.0648	14.4311	19.6987	0.4237	0.141347	2.64156	0.00825253	0.109768
KLK11	8.90006	12.1144	5.68567	-0.972014	0.354835	-2.64149	0.00825427	0.109768
UQCR10	116.122	131.947	100.297	-0.392258	0.130432	-2.64134	0.00825788	0.109768
ACADVL	138.366	133.44	143.292	0.102039	0.0938545	2.64072	0.00827295	0.109911
GNAI3	9.54957	8.99485	10.1043	0.151859	0.0856736	2.63773	0.00834639	0.110811
NOCT	8.66555	6.50985	10.8212	0.654527	0.25629	2.63761	0.0083493	0.110811
EIF3E	358.433	341.397	375.469	0.136861	0.0812197	2.6359	0.00839135	0.111311
FAR2	20.4419	18.2959	22.5879	0.289753	0.165023	2.63484	0.00841766	0.111603
FANCD2	23.9956	27.5539	20.4373	-0.413561	0.122616	-2.63303	0.00846264	0.112141
TXNDC17	386.254	431.394	341.114	-0.337871	0.109611	-2.63269	0.0084712	0.112177
SCYL2	71.8569	69.8128	73.901	0.0809748	0.0896922	2.63257	0.00847408	0.112177
NPEPPS	167.197	157.635	176.76	0.16422	0.0759688	2.63059	0.0085237	0.112775
AMOTL1	112.608	106.684	118.531	0.150568	0.0757859	2.62991	0.0085407	0.112942
PTPN1	54.892	51.8952	57.8889	0.15486	0.090444	2.62918	0.00855911	0.113127
KCNJ15	24.099	22.2797	25.9183	0.209515	0.127932	2.62806	0.00858726	0.11344
CCDC34	44.6595	50.7604	38.5585	-0.387862	0.139141	-2.6276	0.00859893	0.113482
WDR36	47.3343	43.3105	51.358	0.240761	0.091629	2.62759	0.00859923	0.113482
CHMP1B	22.4315	20.3785	24.4844	0.253454	0.135408	2.62691	0.00861648	0.113651
UBQLN1	208.58	199.888	217.272	0.119736	0.0720825	2.62588	0.00864244	0.113934
UQCRQ	294.413	337.038	251.788	-0.41926	0.121339	-2.62074	0.008774	0.115609
TFG	192.512	181.419	203.604	0.165574	0.0836724	2.61916	0.0088147	0.116021
SLC25A11	35.7683	41.0037	30.5328	-0.413667	0.138412	-2.61915	0.00881498	0.116021
BCL10	27.5945	25.1828	30.0061	0.24393	0.125412	2.619	0.00881886	0.116021
TMEM237	24.4235	28.4063	20.4408	-0.455772	0.156974	-2.61845	0.00883297	0.116147
HSDL2	58.1358	64.7732	51.4983	-0.325229	0.0960328	-2.61448	0.00893635	0.117447
PARD6G	16.7833	19.3559	14.2106	-0.420369	0.160781	-2.61385	0.00895287	0.117603
TRIB2	2.85425	1.94485	3.76364	0.693872	0.345367	2.6131	0.00897249	0.117801
PITRM1	101.949	95.6928	108.205	0.175559	0.0867843	2.61279	0.00898076	0.117849
GCSH	76.8247	87.4256	66.224	-0.395488	0.125468	-2.61158	0.00901241	0.118204
SLCO4A1	19.4677	16.8676	22.0679	0.368541	0.201847	2.61015	0.00905037	0.118641
PADI3	0.197025	0.363198	0.030851	-0.40316	1.33091	-2.60977	0.00906022	0.118709
XRCC4	35.4809	31.3291	39.6326	0.329802	0.146634	2.60951	0.00906721	0.11874
KRCC1	40.3618	36.4833	44.2403	0.271362	0.129879	2.60922	0.00907493	0.11878
BTBD11	16.7675	19.744	13.7911	-0.487966	0.136196	-2.60807	0.00910554	0.119089
IL18	261.627	247.427	275.828	0.156168	0.086052	2.60798	0.0091078	0.119089
RAB18	117.247	104.236	130.257	0.318765	0.0975375	2.60616	0.00915628	0.119662
PARD3	54.9716	49.3558	60.5876	0.290482	0.0996083	2.60577	0.00916678	0.119738
NBPF8	4.66384	3.9562	5.37149	0.362398	0.192833	2.60521	0.00918182	0.119873
FNDC3A	24.1568	22.5888	25.7248	0.180074	0.104109	2.60468	0.00919595	0.119997
LSM4	122.007	136.979	107.036	-0.352937	0.116346	-2.60381	0.00921934	0.120241
TSC22D1	48.1658	44.0039	52.3276	0.244832	0.109686	2.60263	0.00925104	0.120593
LY6G5C	0.431387	0.862773	0	-0.897452	2.27853	-2.6008	0.00930062	0.121124
ZNFX1	35.1238	32.2413	38.0063	0.230731	0.0878756	2.60078	0.00930122	0.121124
S100A4	37.4411	46.9997	27.8824	-0.732834	0.268747	-2.60041	0.00931111	0.121191
APP	181.737	172.772	190.702	0.141678	0.0767375	2.59928	0.00934206	0.121532
EVC	12.7634	11.3602	14.1666	0.295191	0.139739	2.59909	0.00934723	0.121538
RALGPS2	78.0871	69.639	86.535	0.309395	0.0842106	2.59881	0.00935473	0.121573
STRIP2	48.0618	45.5956	50.5281	0.145167	0.099239	2.59813	0.00937341	0.121693
FOXJ3	32.3319	29.6998	34.9641	0.228329	0.101958	2.59813	0.00937341	0.121693
ECT2	106.994	99.8415	114.147	0.191381	0.0850336	2.59661	0.00941492	0.12217
SRGAP2	61.672	59.4725	63.8713	0.101301	0.0936961	2.59599	0.00943187	0.122328
CAPZA2	153.248	138.506	167.989	0.276597	0.0955925	2.59549	0.00944553	0.122443
SLC12A7	5.15642	3.80161	6.51122	0.645528	0.232624	2.59471	0.00946698	0.122659
ATF7IP	45.0666	48.4793	41.6539	-0.214149	0.0927251	-2.59351	0.00950006	0.123026
PSMA4	645.771	617.601	673.942	0.125754	0.0769281	2.59314	0.00951029	0.12308
PKP2	73.7881	70.7806	76.7956	0.116097	0.0869607	2.59302	0.00951386	0.12308
TPD52L1	91.8891	103.975	79.8032	-0.377562	0.117289	-2.59132	0.00956078	0.123624
SHANK3	0.286425	0.036995	0.535855	0.566633	2.10557	2.58771	0.00966154	0.124864
INPPL1	43.9373	50.3956	37.479	-0.417572	0.117131	-2.58704	0.00968046	0.125046
FTH1	6409.3	6962.03	5856.56	-0.249415	0.0717476	-2.5865	0.00969555	0.125178
GJB5	32.4749	28.3779	36.5718	0.354919	0.166206	2.58598	0.00971022	0.125304
C2CD3	45.474	49.892	41.056	-0.27513	0.100953	-2.58491	0.00974048	0.125458
HAPLN3	2.16981	1.4197	2.91992	0.695991	0.563251	2.58488	0.00974118	0.125458
TTC14	20.7303	19.9754	21.4852	0.100271	0.131503	2.58486	0.00974173	0.125458
CCNDBP1	37.0408	33.5391	40.5426	0.266361	0.1423	2.58461	0.0097488	0.125486
CDC42EP5	18.123	12.2142	24.0319	0.921684	0.474897	2.58321	0.00978853	0.125934
FOXI1	0.268342	0.0531135	0.483571	0.494413	1.30003	2.58275	0.00980156	0.126038
CALB1	78.1054	64.3965	91.8144	0.505136	0.180374	2.58105	0.00984989	0.126533
SOCS3	2.83754	2.054	3.62109	0.597533	0.339342	2.58074	0.00985878	0.126584
CCZ1	122.508	116.452	128.565	0.141605	0.0908197	2.58014	0.00987589	0.12674
ACTG1	1695.1	1491.59	1898.6	0.347878	0.0807086	2.57996	0.00988129	0.126746
ATP6V1E1	216.547	204.925	228.169	0.154289	0.0880482	2.579	0.00990859	0.127032
SLC25A36	78.9906	73.7343	84.2469	0.189877	0.0960837	2.5787	0.00991741	0.127082
KCNS3	15.3947	13.7615	17.0279	0.288387	0.179581	2.57825	0.00993029	0.127183
DYNC1LI1	31.3967	28.9052	33.8882	0.222341	0.131063	2.57755	0.00995041	0.127377
SLITRK6	1.59374	2.08262	1.10486	-0.550432	0.391753	-2.57642	0.00998299	0.12765
FYB1	27.7872	24.7461	30.8284	0.305961	0.117571	2.57631	0.00998619	0.12765
CHP1	88.4959	95.4296	81.5623	-0.223993	0.0866491	-2.57622	0.00998865	0.12765
PKMYT1	55.7041	63.386	48.0222	-0.39331	0.154565	-2.57612	0.00999167	0.12765
PBK	84.2903	92.8431	75.7374	-0.290321	0.0977801	-2.57541	0.010012	0.127846
CORO1C	201.058	184.862	217.254	0.231777	0.0753962	2.57207	0.0101091	0.129022
ARSI	9.31453	10.7368	7.89227	-0.400414	0.189891	-2.57162	0.0101224	0.129128
ZNF703	10.9548	12.7671	9.14242	-0.440822	0.165184	-2.57016	0.0101653	0.12961
RAI14	30.1759	27.5952	32.7565	0.239397	0.11239	2.56862	0.0102103	0.130077
ATP11A	36.8805	40.5067	33.2543	-0.277059	0.10485	-2.56856	0.0102121	0.130077
VSIG10	59.8184	66.4703	53.1664	-0.316854	0.0968358	-2.56812	0.0102252	0.13018
LPIN2	3.5162	2.84024	4.19215	0.435134	0.232814	2.56715	0.0102538	0.130479
TRAM2	12.4406	11.4086	13.4726	0.221973	0.116566	2.5667	0.0102671	0.130583
NALCN	22.2714	20.1528	24.3899	0.263406	0.139717	2.56586	0.0102921	0.130794
AK4	46.016	50.3619	41.6701	-0.267475	0.0927365	-2.5658	0.0102939	0.130794
[truncated: 22,799 more rows]

## Sheet: All genes Untreated vs IFNG_TNF
Symbol	ExpMean	Exp Unstimulated	Exp IFN+TNF	log2FC	lfcSE	Stat	p-value	padj
CFH	70.6336	8.2631	133.004	3.85464	0.114915	39.53	0	0
IL32	722.87	1.23432	1444.51	9.33752	0.215958	45.365	0	0
CD74	319.227	2.26532	636.188	7.60835	0.18195	47.6973	0	0
ICAM1	125.153	7.49828	242.808	4.84243	0.10696	51.5216	0	0
CCL2	1273.27	22.8906	2523.66	6.7235	0.102902	67.0872	0	0
OAS2	136.28	16.1445	256.414	3.90827	0.0950326	45.1217	0	0
GBP1	510.867	6.7484	1014.99	7.03476	0.0992968	76.9367	0	0
IFIT3	376.589	51.5336	701.644	3.74148	0.0932247	41.7025	0	0
IFIT2	282.592	38.012	527.173	3.75902	0.0998111	38.9521	0	0
IRF1	404.789	47.6133	761.965	3.9722	0.089637	44.8497	0	0
C3	121.089	26.305	215.874	2.98962	0.102166	40.3772	0	0
TRIM22	170.295	19.2711	321.318	3.99099	0.0961103	44.1481	0	0
WARS	2221.83	132.927	4310.73	5.00875	0.0855202	61.0221	0	0
GBP5	86.1397	0.706466	171.573	6.66005	0.168973	43.6597	0	0
MX1	145.158	26.5428	263.772	3.26501	0.106329	40.5524	0	0
C1R	74.527	4.66953	144.385	4.6805	0.127095	41.8256	0	0
GBP2	145.025	4.24712	285.802	5.77238	0.120003	51.6841	0	0
GBP4	277.249	7.75613	546.741	5.96706	0.0882534	68.2715	0	0
CTSS	451.155	5.84772	896.462	7.03408	0.108987	65.9629	0	0
PARP14	184.208	34.4643	333.951	3.23951	0.0789942	41.6319	0	0
SAMD9L	139.777	13.7771	265.777	4.1742	0.0872361	50.0232	0	0
C1S	110.329	4.84573	215.813	5.21292	0.152687	46.7447	0	0
SERPINB2	1791.67	204.087	3379.24	4.04282	0.0901994	46.9431	0	0
OR2I1P	75.6521	0.280768	151.024	6.89114	0.205178	45.7114	0	0
KRT17	830.255	155.415	1505.1	3.26736	0.0878961	37.9928	0	0
SECTM1	155.81	20.3188	291.3	3.77726	0.103763	37.7007	0	4.80603e-308
PLAU	196.125	32.2966	359.954	3.43836	0.0959822	37.2456	1.24923e-303	1.19607e-300
SP110	120.476	16.7659	224.186	3.66393	0.105531	36.6682	2.34888e-294	2.16861e-291
SOD2	634.595	100.889	1168.3	3.52057	0.0863019	36.551	1.72219e-292	1.53519e-289
STAT1	318.166	71.3528	564.979	2.96763	0.0837026	36.0355	2.32902e-284	2.00692e-281
OAS3	194.325	44.0541	344.596	2.93935	0.0880251	35.3174	3.16988e-273	2.64338e-270
APOL3	107.645	11.8671	203.423	3.9898	0.127641	34.7503	1.37239e-264	1.10868e-261
XAF1	105.376	18.434	192.318	3.31432	0.104451	34.7076	6.05341e-264	4.74202e-261
LAP3	182.203	31.645	332.762	3.35389	0.101931	33.8092	1.44622e-250	1.0996e-247
GBP3	186.634	43.5869	329.68	2.89075	0.0931401	33.6796	1.15126e-248	8.50324e-246
TAP1	80.6447	12.2439	149.046	3.50199	0.11266	32.9928	1.02994e-238	7.39584e-236
CIITA	43.4296	4.31393	82.5452	3.97471	0.112489	31.6978	1.66493e-220	1.16325e-217
IFIH1	75.2873	13.6206	136.954	3.23811	0.112441	31.6113	2.58513e-219	1.75864e-216
HAPLN3	48.8302	1.4197	96.2406	5.32866	0.218331	31.2292	4.2839e-214	2.83957e-211
CMPK2	73.7262	8.49983	138.952	3.88089	0.136335	30.9998	5.43095e-211	3.42428e-208
OAS1	142.358	29.7329	254.984	3.0582	0.105747	30.7032	5.15212e-207	3.17113e-204
DDX58	47.7637	9.45735	86.0701	3.05766	0.109086	30.2439	6.27065e-201	3.76983e-198
CD274	30.2837	2.44552	58.1218	4.10089	0.168825	30.0629	1.48188e-198	8.70637e-196
RNF213	416.933	137.909	695.958	2.32694	0.081982	29.946	4.96558e-197	2.85256e-194
LACTB	146.389	31.8185	260.96	2.99676	0.10486	29.8312	1.53925e-195	8.65028e-193
SERPINB1	264.181	61.8235	466.538	2.8957	0.102236	28.7975	2.3056e-182	1.26813e-179
EPSTI1	104.536	18.1658	190.907	3.3238	0.113943	28.7518	8.60755e-182	4.6357e-179
DRAM1	111.157	40.1255	182.188	2.15522	0.100414	28.7385	1.25956e-181	6.64507e-179
UBE2L6	296.717	87.51	505.925	2.51786	0.0929488	28.1936	7.00453e-175	3.62148e-172
APOL2	99.9802	22.1249	177.835	2.95111	0.109699	27.838	1.50529e-170	7.63005e-168
APOL1	54.8202	7.2141	102.426	3.65435	0.139784	27.7626	1.22754e-169	6.10253e-167
DDX60	48.532	10.7292	86.3347	2.89646	0.112536	27.4699	4.01752e-166	1.95956e-163
ITGB6	50.8417	14.209	87.4744	2.54033	0.100211	27.1861	9.48014e-163	4.53836e-160
ANTXR2	66.7813	9.25706	124.305	3.61076	0.129808	27.1384	3.46778e-162	1.62992e-159
APOL6	51.6195	18.9312	84.3079	2.09765	0.0838345	27.0182	9.04047e-161	4.17331e-158
B2M	5503.53	2056.36	8950.7	2.12137	0.0800706	26.9621	4.11103e-160	1.86446e-157
SAMHD1	175.161	61.8206	288.5	2.20426	0.0868696	26.7603	9.3648e-158	4.17395e-155
NCF2	155.127	51.7487	258.506	2.29856	0.0931153	26.4663	2.36876e-154	1.03788e-151
IFITM1	308.683	72.2378	545.129	2.89858	0.118296	26.2702	4.198e-152	1.80871e-149
OPTN	188.093	67.4044	308.783	2.17909	0.0890242	26.0261	2.50576e-149	1.06191e-146
SP100	156.331	49.8817	262.781	2.37412	0.0990104	25.9987	5.12914e-149	2.12097e-146
LAMP3	19.6404	1.07086	38.2099	4.24291	0.190468	25.9984	5.1689e-149	2.12097e-146
ZNF114	75.4665	18.347	132.586	2.78758	0.12098	25.9877	6.82092e-149	2.75512e-146
SLFN5	210.799	92.4211	329.178	1.82142	0.0777966	25.7333	4.95918e-146	1.9723e-143
STAT2	133.382	42.0419	224.723	2.39074	0.098969	25.7031	1.07883e-145	4.22557e-143
STEAP4	43.8449	12.1851	75.5048	2.53665	0.104129	25.6589	3.36238e-145	1.29733e-142
GRAMD2B	130.486	41.2876	219.684	2.38368	0.0986262	25.4831	3.03129e-143	1.15238e-140
ETS1	106.528	36.5481	176.507	2.24107	0.0940794	25.327	1.61249e-141	6.04124e-139
INPP1	203.477	63.3384	343.616	2.42124	0.0999205	25.3132	2.28644e-141	8.44382e-139
IFI35	74.6838	10.9601	138.407	3.54301	0.155145	25.0374	2.39195e-138	8.70906e-136
IFI16	493.455	202.071	784.839	1.95225	0.0852407	24.7633	2.22855e-135	8.00141e-133
HLA-B	204.931	55.955	353.907	2.63955	0.109224	24.7133	7.69118e-135	2.72363e-132
IL1B	120.464	26.4157	214.513	2.9747	0.132029	24.487	2.03294e-132	7.00715e-130
HBEGF	59.5729	12.597	106.549	2.98363	0.131647	24.3601	4.53543e-131	1.5427e-128
KRT13	287.587	491.96	83.2143	-2.54933	0.0986875	-24.3111	1.49641e-130	5.02385e-128
IL18BP	40.3844	3.86354	76.9052	4.00164	0.165299	24.1046	2.2349e-128	7.40699e-126
RNF19B	90.2371	29.8836	150.59	2.29526	0.101759	24.0751	4.56232e-128	1.49292e-125
PDCD1LG2	17.8242	1.04669	34.6018	4.12058	0.214822	24.0251	1.52185e-127	4.91765e-125
DTX3L	115.761	49.4834	182.038	1.85826	0.0823407	23.7788	5.53884e-125	1.76771e-122
NAV3	74.2083	31.7171	116.7	1.84699	0.107693	23.613	2.83248e-123	8.92957e-121
HLA-A	191.605	74.4368	308.774	2.03788	0.0929866	23.325	2.47211e-120	7.69957e-118
PRDM1	15.8061	1.37696	30.2353	3.71598	0.23653	23.2803	7.02159e-120	2.16089e-117
RIPK2	68.7498	20.2141	117.285	2.47918	0.121176	23.1504	1.44165e-118	4.3845e-116
ISG20	57.2595	11.3287	103.19	3.07913	0.189949	23.0944	5.27644e-118	1.58606e-115
KRT15	342.895	560.994	124.796	-2.15946	0.0916219	-22.9988	4.79132e-117	1.42368e-114
RALA	360.171	132.226	588.116	2.14468	0.0838293	22.9335	2.15506e-116	6.33074e-114
MSRB1	94.3819	28.0697	160.694	2.47568	0.116479	22.6743	8.03168e-114	2.33289e-111
PLSCR1	295.503	99.7748	491.231	2.2882	0.105303	22.3468	1.29769e-110	3.7274e-108
TMEM173	47.5907	12.0148	83.1667	2.6931	0.13321	22.2704	7.15883e-110	2.03366e-107
SAMD9	192.353	82.4313	302.276	1.86197	0.0900687	22.2229	2.06301e-109	5.79684e-107
LAMC2	489.837	207.879	771.794	1.88742	0.0905911	22.1345	1.47044e-108	4.08734e-106
PTGS2	31.6177	8.36533	54.8701	2.57667	0.126398	22.0352	1.32332e-107	3.63926e-105
PMAIP1	119.386	35.0175	203.755	2.50713	0.119044	21.9731	5.20449e-107	1.41622e-104
CASP1	129.942	40.6204	219.263	2.40387	0.11755	21.9296	1.35521e-106	3.64933e-104
ASS1	478.63	211.488	745.773	1.81329	0.0895199	21.8138	1.71512e-105	4.57087e-103
NFKBIA	163.306	51.3475	275.265	2.39986	0.114319	21.7734	4.14817e-105	1.09423e-102
FAM84A	74.7708	31.3256	118.216	1.88283	0.0943338	21.679	3.23824e-104	8.45572e-102
TNIP1	159.285	58.5239	260.047	2.13277	0.09912	21.5322	7.7812e-103	2.01152e-100
SEMA5A	13.5383	24.5635	2.51312	-2.86326	0.133502	-21.5059	1.37114e-102	3.50943e-100
KRT4	43.0508	78.7145	7.3872	-3.24858	0.148042	-21.4769	2.55969e-102	6.48731e-100
XDH	34.3646	12.9461	55.7831	2.02559	0.113384	21.4472	4.84589e-102	1.21622e-99
MUC16	13.6741	6.47792	20.8703	1.54826	0.083454	21.4229	8.175e-102	2.03204e-99
TNFSF10	87.5275	26.4605	148.595	2.44563	0.131617	21.2533	3.07525e-100	7.57128e-98
PML	99.2998	40.7325	157.867	1.92858	0.103974	21.2127	7.29257e-100	1.77849e-97
IFI44	59.2325	8.72508	109.74	3.50932	0.180789	21.107	6.85201e-99	1.65543e-96
KLF6	75.6382	29.7229	121.553	1.99603	0.102289	20.9549	1.69458e-97	4.05617e-95
IDO1	540.754	0.56841	1080.94	9.4301	0.618445	20.9423	2.20763e-97	5.23574e-95
NEFL	176.871	278.243	75.4981	-1.86803	0.0846014	-20.8815	7.88413e-97	1.85284e-94
HIST1H1D	460.408	764.811	156.005	-2.28618	0.103542	-20.8579	1.29278e-96	3.01078e-94
CDKN1A	56.3537	14.5319	98.1756	2.67475	0.134617	20.8467	1.63328e-96	3.7698e-94
CYP27B1	29.7616	4.54017	54.983	3.33699	0.180113	20.8016	4.18483e-96	9.57362e-94
MLKL	86.498	33.5114	139.484	2.02527	0.104125	20.7506	1.20962e-95	2.74297e-93
PARP9	90.273	38.7321	141.814	1.84576	0.0906539	20.7344	1.69634e-95	3.81323e-93
ITGA5	30.5704	8.73793	52.4029	2.45523	0.137011	20.6869	4.54737e-95	1.0134e-92
COL27A1	19.3209	6.11339	32.5284	2.23677	0.131732	20.6723	6.14614e-95	1.35798e-92
TRIM69	44.804	12.3343	77.2737	2.55339	0.133707	20.6617	7.66356e-95	1.6789e-92
CD47	357.885	152.905	562.865	1.87331	0.0855307	20.58	4.14556e-94	9.00563e-92
ZNF267	66.3033	25.0091	107.597	2.0619	0.108201	20.5434	8.81048e-94	1.898e-91
HLA-E	62.0447	21.6356	102.454	2.19232	0.113356	20.3512	4.53285e-92	9.68419e-90
PTAFR	26.5085	8.10004	44.917	2.33508	0.126514	20.3299	7.00134e-92	1.48354e-89
ACKR4	15.6828	1.39438	29.9712	3.6932	0.251116	20.2437	4.04082e-91	8.49262e-89
PEG10	9.60653	17.3458	1.86721	-2.67773	0.164066	-20.1123	5.75832e-90	1.20047e-87
NRG1	236.798	114.165	359.432	1.64603	0.0858277	20.0749	1.22257e-89	2.52837e-87
HIST1H3B	813.816	1357.76	269.876	-2.32658	0.109466	-20.0544	1.84673e-89	3.78888e-87
HIST1H1B	804.152	1281.2	327.098	-1.96643	0.0923681	-19.9033	3.80752e-88	7.75025e-86
NAMPT	440.524	191.469	689.578	1.84318	0.0941384	19.8796	6.10608e-88	1.23319e-85
NLRC5	85.5162	28.4433	142.589	2.28593	0.119231	19.8306	1.62208e-87	3.25057e-85
HDAC9	125.304	50.9633	199.645	1.94908	0.102608	19.7698	5.42441e-87	1.07866e-84
CASP4	326.185	158.483	493.887	1.63369	0.0903359	19.7604	6.5332e-87	1.28924e-84
RHOBTB3	250.447	386.803	114.091	-1.75254	0.0863759	-19.7021	2.06796e-86	4.04991e-84
BATF2	33.4829	0.114409	66.8513	5.92803	0.479093	19.6532	5.43133e-86	1.05568e-83
PARP8	96.5228	35.6656	157.38	2.11089	0.116982	19.6197	1.04961e-85	2.02488e-83
RHBDF2	80.6641	24.9883	136.34	2.40182	0.126427	19.5481	4.27905e-85	8.1939e-83
CTSC	282.535	125.859	439.212	1.79498	0.0886569	19.5397	5.04932e-85	9.5978e-83
ZNF704	30.5264	48.4111	12.6416	-1.85683	0.105914	-19.5305	6.04e-85	1.13971e-82
SOCS3	13.6321	2.054	25.2103	3.10136	0.191104	19.5111	8.83954e-85	1.65588e-82
TNFAIP8	100.382	39.6181	161.145	1.99709	0.105062	19.5103	8.97087e-85	1.66839e-82
TNFRSF1B	8.61122	0.85865	16.3638	3.22376	0.224039	19.3928	8.88521e-84	1.64065e-81
NAV2	12.4941	5.59659	19.3916	1.62819	0.120141	19.3372	2.6119e-83	4.78867e-81
SQOR	122.2	52.1835	192.215	1.86116	0.104237	19.2763	8.49954e-83	1.54734e-80
CFB	12.9959	1.60723	24.3846	3.28336	0.230208	19.2239	2.33571e-82	4.22242e-80
MARCKSL1	71.8315	21.0205	122.642	2.48926	0.138003	19.1879	4.67382e-82	8.39048e-80
PLAUR	77.3186	26.7686	127.868	2.21437	0.133133	19.1239	1.5962e-81	2.84575e-79
IFI6	43.08	3.71197	82.448	4.14648	0.241266	19.0267	1.02527e-80	1.81536e-78
VEGFC	26.6519	5.47632	47.8275	2.91445	0.169725	18.9938	1.91831e-80	3.37348e-78
XRN1	63.4116	27.2531	99.5701	1.83172	0.105697	18.947	4.67532e-80	8.16632e-78
DSG4	10.1261	18.871	1.38133	-3.06082	0.192608	-18.9226	7.42643e-80	1.28846e-77
PARP12	93.3649	33.1544	153.576	2.17817	0.121608	18.9191	7.93294e-80	1.36716e-77
INHBA	14.1212	3.54708	24.6954	2.4985	0.169294	18.8371	3.75e-79	6.41995e-77
NUB1	228.113	113.198	343.029	1.59099	0.0919827	18.7051	4.50195e-78	7.65658e-76
FMNL2	34.8191	15.4727	54.1656	1.74369	0.106841	18.6715	8.45246e-78	1.42813e-75
NT5E	66.6401	29.1877	104.093	1.79963	0.0998898	18.6384	1.56948e-77	2.63459e-75
HIST1H2BH	75.0203	122.998	27.0425	-2.14463	0.111425	-18.5805	4.61879e-77	7.70326e-75
ZNFX1	64.7007	32.2413	97.1603	1.56216	0.0906819	18.5783	4.8111e-77	7.97256e-75
HIST1H1C	1203	1837.81	568.197	-1.69177	0.0847381	-18.3937	1.47592e-75	2.43019e-73
CXCL8	45.4911	10.6381	80.344	2.80518	0.168265	18.3912	1.54422e-75	2.52656e-73
PTHLH	116.587	191.314	41.8606	-2.16573	0.114342	-18.3658	2.46718e-75	4.01126e-73
NDRG1	83.4802	35.9584	131.002	1.83659	0.104569	18.2404	2.46551e-74	3.98349e-72
IL6ST	123.933	56.6517	191.214	1.73727	0.0965854	18.2138	4.01281e-74	6.44318e-72
ADAM8	55.5777	19.2483	91.9071	2.19798	0.129239	18.2087	4.40423e-74	7.02801e-72
FLG	6.75594	11.5566	1.95528	-2.08708	0.134597	-18.2037	4.81986e-74	7.64406e-72
RND3	357.154	175.935	538.372	1.60806	0.0963418	18.1833	7.00464e-74	1.10413e-71
CPNE8	22.871	6.43719	39.3048	2.43812	0.152556	18.1356	1.66933e-73	2.61539e-71
IFI30	121.228	45.9969	196.459	2.07092	0.122286	18.1047	2.92731e-73	4.55867e-71
TDRD7	46.9055	21.5078	72.3032	1.70345	0.107294	18.0256	1.22742e-72	1.90001e-70
HELZ2	25.898	6.78883	45.0071	2.56238	0.141867	17.9748	3.06887e-72	4.72223e-70
DUSP6	95.6067	42.0444	149.169	1.80269	0.109831	17.9727	3.18716e-72	4.87523e-70
ITGA2	136.745	78.0192	195.47	1.31404	0.0795143	17.8755	1.8294e-71	2.78187e-69
PSMB9	154.11	54.3901	253.83	2.20184	0.13072	17.8084	6.08737e-71	9.20261e-69
NT5C3A	219.899	108.138	331.661	1.60789	0.0949647	17.7279	2.55583e-70	3.84133e-68
ITGA6	696.005	412.964	979.048	1.24335	0.0747014	17.6614	8.31002e-70	1.24175e-67
TRAF3IP3	43.3904	13.1251	73.6557	2.40199	0.13702	17.6124	1.97849e-69	2.90603e-67
STON1	8.1236	14.5082	1.73905	-2.50128	0.183261	-17.563	4.73061e-69	6.90909e-67
TRIM21	52.7912	19.9282	85.6542	2.04982	0.126773	17.5604	4.95461e-69	7.1956e-67
CCL5	18.2386	0.953947	35.5234	4.22436	0.303773	17.4785	2.09009e-68	3.01848e-66
KDM7A	7.7264	2.2506	13.2022	2.12734	0.148868	17.4355	4.43823e-68	6.37403e-66
F2RL1	67.129	32.539	101.719	1.61479	0.100625	17.4217	5.64435e-68	8.06145e-66
HIST1H4E	163.678	256.173	71.1827	-1.83301	0.0995415	-17.3672	1.46157e-67	2.07599e-65
UGDH	89.7642	40.9289	138.6	1.73528	0.103327	17.3513	1.92729e-67	2.72254e-65
MUC1	29.222	10.6039	47.8402	2.07346	0.187035	17.3086	4.05383e-67	5.69541e-65
VEGFA	67.695	28.0394	107.35	1.89962	0.12416	17.1884	3.24311e-66	4.53177e-64
AKAP2	102.57	55.5358	149.605	1.41353	0.0918833	17.1584	5.4376e-66	7.55739e-64
ARNTL2	178.502	93.3176	263.685	1.48868	0.0897464	17.1303	8.82018e-66	1.21931e-63
KLF7	49.0643	24.6523	73.4762	1.53769	0.0986928	17.1215	1.0262e-65	1.41108e-63
CSF1	15.1966	3.93498	26.4581	2.47612	0.177418	17.0823	2.01143e-65	2.75119e-63
HIST2H4A	1401.57	2101.52	701.612	-1.58132	0.0841982	-16.9198	3.21265e-64	4.37106e-62
GSAP	26.6456	8.6564	44.6348	2.24058	0.146609	16.9074	3.96611e-64	5.36795e-62
PDP1	86.325	43.9641	128.686	1.52818	0.0969071	16.8939	4.98847e-64	6.7165e-62
TAPBP	53.1799	25.7787	80.581	1.60714	0.102444	16.8827	6.03179e-64	8.07916e-62
C1orf74	41.681	20.7201	62.6419	1.55095	0.101197	16.8659	8.01774e-64	1.06838e-61
LYPD5	18.706	5.02862	32.3834	2.46923	0.168775	16.8656	8.05953e-64	1.06845e-61
DDX60L	37.8058	18.4254	57.1862	1.58273	0.120077	16.6904	1.5395e-62	2.03049e-60
FYB1	51.2597	24.7461	77.7733	1.61336	0.105046	16.6877	1.60923e-62	2.11169e-60
HIST1H1E	610.797	924.451	297.142	-1.63415	0.0904994	-16.6517	2.94222e-62	3.84138e-60
BNIP3	31.5534	10.0628	53.044	2.28842	0.141293	16.6317	4.10467e-62	5.33215e-60
RFX5	114.812	51.7921	177.833	1.76021	0.103882	16.5709	1.1314e-61	1.46239e-59
CDCP1	68.8906	36.3593	101.422	1.45498	0.101217	16.4977	3.81329e-61	4.90435e-59
SCEL	15.6748	28.1733	3.17625	-2.80437	0.183898	-16.4966	3.8812e-61	4.96697e-59
RAPH1	28.1203	14.3129	41.9278	1.48716	0.10308	16.4359	1.05758e-60	1.34017e-58
LMO7	169.491	91.5108	247.472	1.42539	0.0885409	16.3345	5.60817e-60	7.07203e-58
IL1A	65.9606	4.38363	127.537	4.57747	0.304686	16.2962	1.04971e-59	1.31728e-57
HIST1H3I	443.272	734.174	152.369	-2.26108	0.130908	-16.2731	1.53135e-59	1.91241e-57
PTPRS	22.8763	37.6431	8.10957	-2.08476	0.121058	-16.2679	1.66767e-59	2.07264e-57
LAMA3	395.238	235.717	554.759	1.2313	0.0813143	16.2408	2.59317e-59	3.20747e-57
HIST1H4C	583.541	942.96	224.122	-2.06802	0.119579	-16.2135	4.04607e-59	4.98071e-57
TNFAIP3	259.16	21.6861	496.635	4.45521	0.288171	16.1277	1.63081e-58	1.99802e-56
OSMR	73.2181	40.1566	106.279	1.38218	0.0965042	16.1211	1.81252e-58	2.21016e-56
HIST1H4B	552.432	908.345	196.519	-2.20283	0.129586	-16.0728	3.95788e-58	4.80353e-56
HCAR2	90.115	46.3415	133.888	1.51059	0.102691	16.0532	5.42978e-58	6.55913e-56
ERAP2	50.4115	24.7464	76.0766	1.58192	0.126857	16.0505	5.67271e-58	6.82071e-56
MCUB	43.4013	18.028	68.7746	1.87458	0.128871	16.0493	5.7791e-58	6.91646e-56
SCD	449.892	644.221	255.563	-1.33048	0.0764472	-16.0104	1.08035e-57	1.28702e-55
PTPN12	138.403	81.6484	195.157	1.24695	0.0947353	15.9861	1.59704e-57	1.89381e-55
NFKB2	75.5445	31.265	119.824	1.90486	0.129512	15.9705	2.05158e-57	2.42171e-55
LDLR	115.37	68.3405	162.399	1.23663	0.0976815	15.9376	3.47249e-57	4.08033e-55
CEACAM6	9.04284	1.54833	16.5373	2.78281	0.236079	15.9358	3.57373e-57	4.1803e-55
TRANK1	8.67889	3.00549	14.3523	1.93841	0.159016	15.92	4.60306e-57	5.36008e-55
BACH1	84.6222	39.7803	129.464	1.67771	0.107442	15.9091	5.47571e-57	6.34764e-55
HIST2H2BF	265.513	391.961	139.065	-1.48828	0.0893123	-15.8948	6.89023e-57	7.95175e-55
HSD17B2	25.5841	3.46341	47.7049	3.44785	0.159988	15.8626	1.15062e-56	1.32198e-54
PARD3	93.7979	49.3558	138.24	1.46735	0.0955012	15.8214	2.21559e-56	2.53431e-54
MACF1	90.5332	58.8558	122.21	1.04156	0.0813867	15.7683	5.13884e-56	5.85217e-54
KRT6A	1282.02	791.901	1772.14	1.1611	0.0787457	15.7544	6.40163e-56	7.25827e-54
AC005515.1	42.5148	0.0791325	84.9504	6.31556	0.6097	15.7513	6.73246e-56	7.60003e-54
HLA-C	159.703	76.0144	243.391	1.66599	0.115732	15.6882	1.82112e-55	2.04686e-53
ARHGAP31	4.40187	1.1839	7.61984	1.98075	0.174087	15.6776	2.15288e-55	2.40927e-53
HIST1H2AI	356.861	590.259	123.462	-2.24808	0.136563	-15.5777	1.03152e-54	1.14939e-52
IL7R	93.0361	55.4887	130.583	1.21994	0.0972557	15.5745	1.08507e-54	1.20386e-52
HLA-DQB1	22.6234	6.07983	39.1671	2.50423	0.177992	15.5473	1.65963e-54	1.83346e-52
MT2A	494.45	271.418	717.481	1.39913	0.0983597	15.5403	1.84976e-54	2.03481e-52
MET	97.8375	58.5674	137.107	1.2132	0.0850816	15.5226	2.44028e-54	2.67304e-52
ATF3	17.1964	2.99388	31.3989	3.02008	0.235311	15.5114	2.90656e-54	3.17035e-52
SLC7A5	367.223	534.021	200.424	-1.40936	0.0839852	-15.5042	3.24746e-54	3.52732e-52
GBP1P1	12.4985	0.991699	24.0053	3.65016	0.299345	15.4869	4.25093e-54	4.59551e-52
PHF11	52.5249	19.1882	85.8616	2.10521	0.153265	15.4867	4.26646e-54	4.59551e-52
TFPI2	91.1467	39.0374	143.256	1.84921	0.122501	15.4849	4.38748e-54	4.70626e-52
ETV7	24.9778	6.53972	43.4158	2.55849	0.191386	15.4696	5.56188e-54	5.94133e-52
STAT3	108.449	61.6492	155.25	1.31848	0.0904281	15.4314	1.00635e-53	1.07058e-51
FAS	44.2927	18.0922	70.4931	1.90483	0.132014	15.4013	1.60295e-53	1.69134e-51
TRAFD1	181.541	98.4691	264.613	1.417	0.0955791	15.4008	1.61535e-53	1.6975e-51
HIST1H3F	416.453	682.957	149.949	-2.17984	0.133321	-15.3979	1.69195e-53	1.7708e-51
NINJ1	39.4412	10.1909	68.6915	2.63865	0.175838	15.339	4.19654e-53	4.37439e-51
MPZL2	193.348	118.862	267.834	1.16535	0.088118	15.3306	4.7742e-53	4.95654e-51
GJB2	49.801	21.0357	78.5665	1.85232	0.131952	15.2998	7.67013e-53	7.93122e-51
ERO1A	152.067	84.4287	219.705	1.36933	0.0916367	15.2699	1.21427e-52	1.2506e-50
LGMN	54.8633	25.0037	84.7228	1.72097	0.133108	15.2253	2.40217e-52	2.46423e-50
CACNG4	27.8213	45.4916	10.151	-2.0598	0.135312	-15.2174	2.71296e-52	2.77205e-50
RAPGEFL1	26.0019	43.5255	8.47838	-2.23192	0.151582	-15.2034	3.35712e-52	3.41673e-50
HIST1H2BI	528.026	855.393	200.659	-2.08636	0.129174	-15.1845	4.47636e-52	4.53797e-50
UNC5B	10.8894	17.9044	3.87453	-1.95538	0.137955	-15.1588	6.62428e-52	6.68923e-50
SLC9A7	26.0008	11.6634	40.3382	1.70681	0.106728	15.1383	9.05384e-52	9.10703e-50
NEURL3	11.846	0.968039	22.724	3.59152	0.311687	15.1076	1.44351e-51	1.44636e-49
CYLD	58.8003	28.7793	88.8213	1.59275	0.102277	15.1062	1.47378e-51	1.47099e-49
NUDCD1	68.2352	34.0999	102.371	1.55829	0.110635	15.0976	1.67879e-51	1.66917e-49
GSDMC	27.6606	8.21292	47.1084	2.38456	0.170608	15.0942	1.76706e-51	1.75021e-49
IRF9	66.9977	17.8475	116.148	2.63589	0.172573	15.0571	3.10113e-51	3.05982e-49
SERPINE1	39.0875	17.6545	60.5205	1.72155	0.125582	15.0251	5.02578e-51	4.93998e-49
SPRR1B	62.6717	13.0698	112.274	3.00914	0.215055	15.014	5.94617e-51	5.82251e-49
PBX1	42.3259	66.0726	18.5791	-1.77641	0.132109	-14.9486	1.59067e-50	1.55171e-48
HIST1H4D	640.953	1045.92	235.986	-2.14328	0.135377	-14.9403	1.80194e-50	1.7512e-48
HIST2H2AC	1264.38	1926.75	602.014	-1.67665	0.103726	-14.8903	3.81139e-50	3.69019e-48
HIST1H3G	38.1507	61.4159	14.8856	-1.9742	0.129944	-14.8692	5.21985e-50	5.03501e-48
SLC31A2	67.443	29.2466	105.639	1.8179	0.133872	14.8596	6.03121e-50	5.79602e-48
HIST1H2AE	556.801	860.167	253.435	-1.759	0.109549	-14.8441	7.59811e-50	7.27477e-48
MXD1	31.5196	14.2943	48.7448	1.70155	0.115671	14.8354	8.65229e-50	8.25352e-48
ILK	135.315	73.8539	196.776	1.40172	0.101944	14.8263	9.90067e-50	9.40964e-48
PPP1R15A	62.9351	27.5218	98.3483	1.80043	0.131439	14.8011	1.44053e-49	1.36407e-47
FGD6	62.4022	38.6065	86.198	1.13856	0.09033	14.7901	1.6963e-49	1.6004e-47
TMEM171	27.1553	7.3815	46.9291	2.51562	0.190525	14.7826	1.89808e-49	1.78426e-47
HIST1H4J	989.956	1520.76	459.158	-1.72554	0.107887	-14.7718	2.22716e-49	2.08602e-47
FST	564.547	329.433	799.66	1.27683	0.095931	14.7347	3.86061e-49	3.60291e-47
HIST1H2AM	428.2	694.696	161.703	-2.09621	0.13364	-14.7277	4.27824e-49	3.9783e-47
CTSH	211.118	321.453	100.783	-1.66359	0.105811	-14.6717	9.78772e-49	9.0689e-47
LYN	50.749	26.3158	75.1822	1.47972	0.110171	14.6483	1.38046e-48	1.27451e-46
JAK2	9.80226	3.04456	16.56	2.11823	0.174111	14.6417	1.5228e-48	1.40092e-46
LGALS8	248.395	175.213	321.577	0.872325	0.0843681	14.627	1.88814e-48	1.73086e-46
RSAD2	43.5851	3.8289	83.3412	4.12647	0.351562	14.606	2.57335e-48	2.35066e-46
SERPINB8	71.0662	37.8505	104.282	1.43825	0.106904	14.5919	3.16063e-48	2.87696e-46
OTUD4	52.7517	30.5123	74.9912	1.26992	0.0998842	14.5644	4.72954e-48	4.28994e-46
IGFBP3	810.056	497.743	1122.37	1.17147	0.0882987	14.5321	7.58555e-48	6.84946e-46
MAST4	55.6799	33.0622	78.2976	1.2191	0.0955571	14.5319	7.60433e-48	6.84946e-46
LUZP2	17.1163	28.391	5.84169	-2.10295	0.150536	-14.4839	1.53061e-47	1.37388e-45
CLDN1	191.013	111.608	270.418	1.26921	0.0901717	14.4823	1.5671e-47	1.40177e-45
TYMP	18.6916	4.31899	33.0641	2.67903	0.205528	14.4767	1.70066e-47	1.51599e-45
ID3	143.246	223.825	62.6673	-1.82018	0.119152	-14.4746	1.75293e-47	1.55721e-45
RP2	29.2632	14.08	44.4464	1.59153	0.12227	14.4717	1.82863e-47	1.61891e-45
GABARAPL1	83.1235	45.4899	120.757	1.38902	0.10639	14.4416	2.83247e-47	2.49905e-45
ANXA3	221.465	119.959	322.971	1.42135	0.102053	14.434	3.16153e-47	2.77989e-45
AL031777.3	143.095	231.819	54.3706	-2.07202	0.134023	-14.4029	4.96325e-47	4.34932e-45
HIST1H2BM	368.664	607.069	130.258	-2.21183	0.145202	-14.356	9.77633e-47	8.5381e-45
ZC3H12C	22.5598	11.5352	33.5844	1.46414	0.114377	14.3547	9.95439e-47	8.66434e-45
NUAK2	14.6708	5.47286	23.8687	1.94186	0.155985	14.3287	1.44871e-46	1.25673e-44
CTSB	249.359	152.381	346.338	1.17922	0.0893316	14.3138	1.79544e-46	1.5523e-44
ZNF488	18.1449	29.8985	6.39128	-2.06364	0.147767	-14.3102	1.8907e-46	1.62921e-44
HIST2H2BE	181.35	261.801	100.899	-1.36683	0.0883036	-14.2848	2.72041e-46	2.33639e-44
RNF152	55.9633	36.0881	75.8385	1.05087	0.0914282	14.2524	4.3325e-46	3.70859e-44
ELK3	55.2885	31.5588	79.0182	1.29728	0.10791	14.1809	1.20216e-45	1.02565e-43
HOXC13	22.0249	37.2563	6.79347	-2.29536	0.165644	-14.1654	1.50011e-45	1.27564e-43
HIVEP2	13.8759	9.03103	18.7208	0.975252	0.130758	14.1491	1.89131e-45	1.60302e-43
OLFML2A	17.2781	27.0011	7.55499	-1.71065	0.120693	-14.1375	2.22994e-45	1.88386e-43
ERAP1	108.969	71.0182	146.919	1.03838	0.0901305	14.1045	3.56504e-45	3.00195e-43
EPB41L1	113.117	163.41	62.8241	-1.36512	0.0926953	-14.0948	4.08586e-45	3.42934e-43
HIST1H2BC	476.591	721.735	231.447	-1.63656	0.105976	-14.0922	4.24388e-45	3.55044e-43
OASL	12.7097	3.89116	21.5282	2.20349	0.188101	14.0845	4.72801e-45	3.94271e-43
CCNL1	177.538	96.1792	258.897	1.41922	0.106948	14.0571	6.96909e-45	5.79286e-43
ALPP	17.271	29.6723	4.86975	-2.38556	0.1784	-13.9559	2.89799e-44	2.39348e-42
PRRG1	32.1223	15.865	48.3798	1.54989	0.120153	13.9534	3.00055e-44	2.47029e-42
FERMT1	135.745	84.2722	187.218	1.14226	0.0901182	13.9015	6.20057e-44	5.0886e-42
SOAT1	88.4597	48.6829	128.237	1.37919	0.0965531	13.8334	1.60237e-43	1.31085e-41
GBP6	38.7848	20.3866	57.1829	1.44388	0.116136	13.7874	3.03403e-43	2.47422e-41
GABRE	80.0048	121.235	38.7746	-1.61974	0.116422	-13.6603	1.75319e-42	1.42521e-40
BLZF1	80.8129	42.7443	118.882	1.45444	0.11464	13.6461	2.13064e-42	1.72662e-40
OGFRL1	10.386	4.63922	16.1327	1.60318	0.138831	13.6358	2.45186e-42	1.98072e-40
HIF1A	139.371	84.5335	194.208	1.19045	0.0943843	13.6254	2.82927e-42	2.27849e-40
TNFAIP1	65.7925	38.3646	93.2204	1.25914	0.0991328	13.6185	3.1071e-42	2.49446e-40
IFI27	41.0366	4.55028	77.5229	3.82248	0.268527	13.607	3.6368e-42	2.91068e-40
HIST1H4H	461.568	733.449	189.686	-1.94546	0.120862	-13.6029	3.84973e-42	3.07159e-40
IL6	18.7374	0.780799	36.6941	4.40374	0.415929	13.5673	6.25537e-42	4.97562e-40
HIST1H2BE	305.767	490.226	121.309	-2.00585	0.129431	-13.5602	6.89882e-42	5.47059e-40
ACSL5	8.47024	2.31318	14.6273	2.23778	0.232153	13.5544	7.46518e-42	5.9016e-40
PSMB8	61.8093	22.3229	101.296	2.13292	0.163914	13.4899	1.79259e-41	1.41281e-39
CARD11	49.3887	26.9068	71.8706	1.38472	0.112242	13.4832	1.96401e-41	1.54321e-39
HSPA5	414.021	279.906	548.136	0.967079	0.0804774	13.4601	2.68517e-41	2.10347e-39
HIST2H2AB	495.282	772.753	217.811	-1.82218	0.125849	-13.445	3.29489e-41	2.5733e-39
CDK18	44.2148	23.7327	64.6969	1.40941	0.127479	13.4313	3.96379e-41	3.08639e-39
HIST1H2BN	102.892	162.549	43.2352	-1.88646	0.134747	-13.4091	5.3517e-41	4.15456e-39
SLFN11	75.7906	46.3023	105.279	1.16788	0.0961653	13.3952	6.45441e-41	4.99313e-39
IVL	14.2554	25.1725	3.3382	-2.59288	0.209327	-13.395	6.47054e-41	4.99313e-39
STARD4	34.6023	17.0986	52.1059	1.55299	0.135449	13.3936	6.58785e-41	5.06853e-39
RALGPS2	124.622	69.639	179.605	1.3543	0.0897694	13.3909	6.83829e-41	5.2456e-39
SEC24A	36.467	21.1745	51.7594	1.25052	0.106795	13.3873	7.1728e-41	5.48592e-39
CFLAR	48.4402	21.7612	75.1192	1.74169	0.106796	13.3752	8.43748e-41	6.43414e-39
WASHC4	80.5999	49.2878	111.912	1.16692	0.0940951	13.3663	9.5188e-41	7.23737e-39
CASP8	91.2916	53.8537	128.73	1.24185	0.103235	13.3607	1.02598e-40	7.77787e-39
ETV6	29.8372	17.2171	42.4572	1.2543	0.107417	13.3526	1.14358e-40	8.64403e-39
CD24	340.209	476.14	204.279	-1.21683	0.0848253	-13.3218	1.72892e-40	1.30304e-38
HAS3	80.6225	46.36	114.885	1.29095	0.103539	13.2816	2.95947e-40	2.22399e-38
CD59	307.743	189.144	426.343	1.1683	0.0873105	13.2352	5.49394e-40	4.11664e-38
EDNRA	4.84705	0.363917	9.33019	2.92104	0.394738	13.1632	1.42947e-39	1.06801e-37
SP140L	32.051	13.2148	50.8872	1.86799	0.152476	13.1545	1.60264e-39	1.19394e-37
NOCT	22.0083	6.50985	37.5068	2.35826	0.189712	13.1455	1.80533e-39	1.34108e-37
HIST1H2AG	49.5675	78.2652	20.8697	-1.85775	0.137806	-13.1299	2.21882e-39	1.64352e-37
IFITM3	586.035	364.102	807.969	1.14778	0.0973856	13.1222	2.45817e-39	1.81561e-37
SLC12A7	10.1221	3.80161	16.4426	1.86102	0.174233	13.0906	3.72493e-39	2.7434e-37
SLC15A3	27.0775	7.25287	46.9022	2.53712	0.210682	13.0606	5.53063e-39	4.06171e-37
PPA1	570.15	379.801	760.499	0.999803	0.0867073	13.042	7.05684e-39	5.16788e-37
SDCBP	153.285	94.8702	211.7	1.14967	0.101098	13.0397	7.27233e-39	5.31065e-37
UBA6	89.7047	49.5489	129.861	1.37228	0.102383	13.0359	7.64128e-39	5.56436e-37
NT5C2	230.779	158.344	303.214	0.932944	0.0865814	12.9609	2.03854e-38	1.47734e-36
CNTN1	77.4931	106.668	48.3186	-1.12638	0.0907551	-12.9608	2.0402e-38	1.47734e-36
SREBF1	78.8965	119.471	38.3214	-1.6153	0.120005	-12.9535	2.24543e-38	1.62141e-36
TARSL2	29.2584	15.4443	43.0724	1.42229	0.139739	12.9321	2.96645e-38	2.13609e-36
BIRC3	49.3566	9.28295	89.4303	3.13655	0.277738	12.9286	3.10253e-38	2.22788e-36
TMSB10	4074.84	2786.55	5363.14	0.944352	0.0839706	12.8937	4.88152e-38	3.49563e-36
PTER	46.1994	26.1273	66.2714	1.31025	0.113439	12.8926	4.95706e-38	3.53992e-36
GANC	69.1545	38.2446	100.064	1.36471	0.112611	12.8889	5.1961e-38	3.70039e-36
RTP4	28.6409	11.0512	46.2306	1.97054	0.169362	12.8841	5.53265e-38	3.92924e-36
HIST2H3C	229.701	331.708	127.695	-1.37031	0.097874	-12.8836	5.56897e-38	3.94421e-36
HIST1H2BF	74.9288	118.766	31.0921	-1.89992	0.140755	-12.8818	5.69774e-38	4.02438e-36
CXCL16	126.313	74.1705	178.457	1.2554	0.101291	12.8752	6.2053e-38	4.37093e-36
IL31RA	4.93609	0.43002	9.44217	2.86831	0.352782	12.8644	7.1381e-38	5.01432e-36
LGALS3BP	148.965	88.5435	209.386	1.23238	0.104707	12.8554	8.02583e-38	5.62265e-36
RNF114	92.6412	54.0643	131.218	1.26373	0.108937	12.8277	1.14676e-37	8.01215e-36
CEACAM1	9.76451	3.63278	15.8963	1.86675	0.25874	12.8074	1.49057e-37	1.03862e-35
TMEM132A	69.644	32.914	106.374	1.66269	0.135706	12.7846	1.99867e-37	1.38891e-35
PSMB10	79.8599	39.1653	120.555	1.59758	0.138692	12.7473	3.22755e-37	2.23687e-35
SAA2	36.6966	7.44907	65.9441	2.98609	0.258965	12.735	3.77755e-37	2.61106e-35
SLC10A6	8.13852	0.589499	15.6875	3.39213	0.401341	12.7191	4.62922e-37	3.1912e-35
KLK5	68.7004	105.507	31.8943	-1.69503	0.128611	-12.6949	6.31036e-37	4.33854e-35
AKAP12	7.48715	3.1852	11.7891	1.61155	0.150979	12.6926	6.4989e-37	4.45632e-35
IRF2	63.7563	32.2981	95.2144	1.53082	0.125968	12.6832	7.3236e-37	5.00853e-35
MORC3	43.2456	25.3303	61.1609	1.23928	0.109443	12.6344	1.36505e-36	9.3108e-35
SH3KBP1	12.6613	3.69509	21.6276	2.26886	0.190206	12.5943	2.27003e-36	1.54428e-34
ITPKC	17.8501	7.99159	27.7087	1.67484	0.152345	12.5893	2.41876e-36	1.64114e-34
GSDMB	21.0376	5.34143	36.7338	2.57298	0.200046	12.5796	2.73582e-36	1.85141e-34
SDCBP2	15.2372	3.63712	26.8372	2.58571	0.236921	12.5658	3.25705e-36	2.19838e-34
GALNT3	163.118	107.965	218.271	1.00885	0.093304	12.5237	5.54089e-36	3.73015e-34
CD82	65.4275	31.0995	99.7555	1.65024	0.135266	12.4976	7.69686e-36	5.16809e-34
SMG1	151.063	123.472	178.655	0.529404	0.0797897	12.4668	1.1335e-35	7.59122e-34
HIST1H2BG	116.577	170.776	62.3772	-1.4385	0.107285	-12.448	1.43319e-35	9.5735e-34
NMI	77.8801	44.0682	111.692	1.3222	0.115427	12.4235	1.94847e-35	1.2982e-33
CBX5	89.5989	116.788	62.4094	-0.893431	0.0869185	-12.3815	3.29038e-35	2.18662e-33
PSME1	298.925	190.429	407.421	1.09325	0.0981486	12.3596	4.32487e-35	2.86672e-33
TRAF1	3.31083	0.616351	6.0053	2.11571	0.252652	12.3545	4.60455e-35	3.0443e-33
HIST2H2AA3	623.482	912.36	334.603	-1.44443	0.108082	-12.3486	4.95545e-35	3.26794e-33
MCL1	304.461	201.473	407.449	1.01243	0.0879256	12.3477	5.01389e-35	3.29807e-33
AIM2	8.20106	0.275611	16.1265	3.74697	0.552857	12.3466	5.08121e-35	3.33387e-33
HIST1H2AL	273.798	444.725	102.872	-2.10135	0.16043	-12.3393	5.56532e-35	3.64226e-33
NABP1	81.5486	48.8783	114.219	1.2079	0.10049	12.3332	6.00238e-35	3.91837e-33
CARD6	14.698	6.33354	23.0625	1.7142	0.166622	12.3255	6.60367e-35	4.30004e-33
VSNL1	146.769	92.2467	201.292	1.11731	0.102867	12.2791	1.17304e-34	7.61918e-33
NIPAL4	19.4274	8.63603	30.2188	1.6959	0.155729	12.2733	1.25975e-34	8.16186e-33
GPD2	150.05	98.7695	201.329	1.02004	0.0859181	12.2727	1.26894e-34	8.20085e-33
ADRB2	21.4634	10.8375	32.0893	1.483	0.136606	12.2681	1.34415e-34	8.66523e-33
MPHOSPH6	241.436	144.433	338.439	1.2228	0.111651	12.244	1.80988e-34	1.16386e-32
NFE2L3	72.147	47.7573	96.5367	1.00033	0.109824	12.2354	2.01017e-34	1.28945e-32
MMP13	6.75335	12.6104	0.896296	-2.84345	0.312591	-12.196	3.26437e-34	2.08879e-32
TAP2	17.3533	7.6033	27.1034	1.70778	0.145725	12.158	5.20365e-34	3.32147e-32
CCDC68	7.67775	1.5807	13.7748	2.5173	0.258557	12.1517	5.61786e-34	3.57703e-32
HLA-F	32.3381	10.3862	54.2901	2.27973	0.233749	12.1505	5.70034e-34	3.62063e-32
MXRA5	53.6887	37.4484	69.9291	0.883454	0.083346	12.142	6.32875e-34	4.00991e-32
NMNAT2	17.7615	10.4983	25.0249	1.17848	0.141427	12.1034	1.01382e-33	6.40789e-32
HIST1H3H	48.6426	78.0161	19.2691	-1.96287	0.156812	-12.0997	1.05985e-33	6.68251e-32
GCH1	17.9175	8.07853	27.7565	1.66336	0.155961	12.0861	1.25148e-33	7.85244e-32
HIST1H2AB	155.627	267.675	43.5786	-2.59144	0.206497	-12.0613	1.69161e-33	1.05884e-31
PICALM	297.08	199.23	394.93	0.983589	0.0877034	12.0325	2.39772e-33	1.49719e-31
ADAR	255.632	175.719	335.545	0.92934	0.085506	12.0254	2.61228e-33	1.62723e-31
C1orf21	83.4921	51.0072	115.977	1.16944	0.107048	12.023	2.68902e-33	1.671e-31
STARD5	28.6358	14.0105	43.2611	1.56007	0.145414	12.0227	2.70023e-33	1.67395e-31
MAP3K8	45.801	23.5253	68.0767	1.49393	0.149773	12.012	3.07434e-33	1.90131e-31
C5orf15	70.235	40.9728	99.4972	1.25963	0.111415	12.0011	3.50578e-33	2.16296e-31
MAP2K6	6.97164	11.5466	2.39667	-1.8851	0.217256	-12.0004	3.53425e-33	2.17533e-31
PLXDC2	25.5667	35.498	15.6354	-1.13357	0.112546	-11.9998	3.55962e-33	2.18574e-31
BMP2	12.0144	5.00611	19.0226	1.73713	0.16938	11.9954	3.75584e-33	2.30076e-31
SMTNL1	7.44342	0.932393	13.9544	2.95211	0.336159	11.9935	3.84246e-33	2.34826e-31
LSR	128.902	83.2297	174.574	1.05968	0.102985	11.956	6.03699e-33	3.68072e-31
DUSP5	27.3308	3.00923	51.6523	3.7151	0.355534	11.917	9.65028e-33	5.86987e-31
HIST1H2AH	312.68	494.735	130.625	-1.91313	0.15021	-11.8942	1.26871e-32	7.69891e-31
ADGRF4	19.0253	9.29495	28.7557	1.53123	0.146761	11.8706	1.68286e-32	1.01644e-30
CAB39	111.725	73.7202	149.729	1.01239	0.0934333	11.8547	2.0349e-32	1.22335e-30
CYP1B1	21.4838	31.7293	11.2383	-1.41918	0.122581	-11.8288	2.76942e-32	1.66107e-30
BHLHE40	38.6335	21.0069	56.2601	1.37957	0.132219	11.8062	3.62514e-32	2.16929e-30
CEACAM5	6.08338	1.3613	10.8055	2.3218	0.272966	11.7993	3.93391e-32	2.34863e-30
CASP10	20.2157	9.2339	31.1974	1.65359	0.152228	11.7892	4.43773e-32	2.64331e-30
HIST1H2AC	73.3726	111.712	35.0336	-1.64522	0.132705	-11.7794	4.98452e-32	2.96218e-30
LAYN	18.6368	6.40284	30.8707	2.10608	0.1965	11.7576	6.45613e-32	3.82793e-30
ITSN2	39.1896	25.7789	52.6002	1.00114	0.105383	11.7333	8.60142e-32	5.08822e-30
HIST2H2AA4	874.974	1223.55	526.398	-1.21529	0.0918546	-11.7116	1.11155e-31	6.56044e-30
TMCC3	53.4478	32.5495	74.3461	1.16724	0.102859	11.673	1.75069e-31	1.03091e-29
IFIT5	48.0614	29.4072	66.7156	1.15508	0.111186	11.6542	2.18442e-31	1.2834e-29
USP15	133.421	82.0288	184.814	1.16217	0.096672	11.6446	2.44363e-31	1.43243e-29
P4HA1	50.8084	30.0966	71.5202	1.22163	0.117542	11.6429	2.49525e-31	1.45609e-29
HIST1H2BL	255.345	394.965	115.725	-1.76227	0.140345	-11.6407	2.55943e-31	1.49018e-29
BAZ1A	72.7919	50.1217	95.4621	0.916026	0.0909818	11.6342	2.76271e-31	1.60491e-29
MVP	134.639	91.4809	177.797	0.951091	0.0990441	11.6107	3.63731e-31	2.10826e-29
PPP1R18	38.5495	22.0615	55.0374	1.2809	0.127126	11.609	3.70899e-31	2.14499e-29
HS3ST1	8.32587	3.8529	12.7988	1.50763	0.166322	11.5793	5.24528e-31	3.02669e-29
AC241585.2	75.038	32.2311	117.845	1.83848	0.163308	11.5714	5.75197e-31	3.31167e-29
IFNGR2	56.0671	27.537	84.5972	1.58473	0.14341	11.5595	6.61095e-31	3.79777e-29
DLGAP4	52.8133	30.7087	74.9179	1.25956	0.114237	11.5556	6.91319e-31	3.96259e-29
MAFF	14.9342	6.14875	23.7196	1.78989	0.177766	11.551	7.29773e-31	4.17375e-29
ERRFI1	36.564	19.3163	53.8117	1.43184	0.135162	11.5335	8.94288e-31	5.10337e-29
IRF6	413.708	277.214	550.202	0.98639	0.0855943	11.5058	1.23404e-30	7.02667e-29
TPM4	568.306	412.017	724.595	0.812964	0.0778868	11.4852	1.56515e-30	8.89245e-29
LACC1	13.5623	5.70434	21.4203	1.74164	0.160323	11.46	2.09396e-30	1.18708e-28
TMBIM1	169.095	116.7	221.491	0.918639	0.094551	11.4459	2.46666e-30	1.39531e-28
CCND2	141.234	95.2023	187.267	0.968633	0.0942948	11.442	2.57844e-30	1.45535e-28
GOLM1	142.85	100.8	184.899	0.868778	0.0872112	11.432	2.89497e-30	1.63046e-28
DNAJA1	201.887	142.524	261.25	0.869648	0.0857467	11.4281	3.02604e-30	1.70057e-28
SFN	826.801	571.017	1082.59	0.921682	0.0909266	11.4237	3.18492e-30	1.78597e-28
FRMD4B	68.2594	47.5583	88.9605	0.889576	0.104446	11.4187	3.3723e-30	1.88695e-28
TMEM87B	68.4132	40.0325	96.7939	1.25298	0.108558	11.4092	3.76287e-30	2.10095e-28
VAV3	21.9647	35.2495	8.67982	-1.90491	0.174937	-11.4083	3.80104e-30	2.11769e-28
HMGA2	69.4757	46.5243	92.4271	0.975176	0.0973132	11.3982	4.26771e-30	2.36748e-28
SSTR2	3.89678	1.46776	6.3258	1.56978	0.202449	11.3978	4.28778e-30	2.37352e-28
KITLG	34.7065	50.5897	18.8233	-1.37989	0.121469	-11.3911	4.631e-30	2.55597e-28
TOP1	134.136	95.4246	172.847	0.850344	0.0850859	11.391	4.63714e-30	2.55597e-28
NUCB1	61.836	38.7968	84.8752	1.10959	0.111383	11.3309	9.22867e-30	5.07597e-28
DAPP1	34.2474	18.8353	49.6596	1.35276	0.132843	11.3236	1.00239e-29	5.50166e-28
TOM1L2	90.5747	124.028	57.1214	-1.10511	0.0993192	-11.3089	1.18606e-29	6.49592e-28
RELB	12.6484	3.40179	21.8951	2.37888	0.243188	11.3055	1.2321e-29	6.73382e-28
SAT1	135.522	81.0047	190.04	1.22009	0.118261	11.2868	1.52535e-29	8.31895e-28
ZC3HAV1	63.4025	39.7017	87.1033	1.11411	0.0914917	11.2863	1.53355e-29	8.34604e-28
HERC6	10.1626	3.92419	16.401	1.82121	0.197252	11.2799	1.64956e-29	8.95855e-28
DAG1	60.9198	85.5348	36.3048	-1.21392	0.0983312	-11.2698	1.84957e-29	1.00237e-27
PSME2	232.158	142.256	322.06	1.1732	0.111525	11.2585	2.10369e-29	1.13771e-27
ERMP1	22.9485	33.6029	12.294	-1.38012	0.117927	-11.2524	2.2542e-29	1.21656e-27
FNDC3A	34.3762	22.5888	46.1636	0.999572	0.109087	11.226	3.04028e-29	1.63738e-27
PCSK5	25.0085	35.5719	14.4451	-1.24359	0.131071	-11.2096	3.65656e-29	1.96519e-27
EDN1	7.13125	1.5048	12.7577	2.45747	0.285299	11.2058	3.82091e-29	2.04926e-27
SAMD4A	22.047	12.9613	31.1327	1.20261	0.12791	11.1963	4.25e-29	2.27467e-27
CKAP4	144.781	101.823	187.739	0.876227	0.0889232	11.1942	4.35129e-29	2.32088e-27
DOCK10	22.824	16.3133	29.3348	0.809097	0.11771	11.1942	4.35428e-29	2.32088e-27
IKBKE	32.7505	15.1368	50.3642	1.67041	0.150931	11.1339	8.57896e-29	4.56327e-27
USP43	13.9531	6.53351	21.3727	1.57035	0.16526	11.131	8.86559e-29	4.70605e-27
PRNP	307.942	220.754	395.129	0.83701	0.0857223	11.1224	9.75917e-29	5.16976e-27
MX2	14.397	6.52141	22.2726	1.62956	0.199312	11.1138	1.0754e-28	5.6851e-27
GPNMB	517.476	690.149	344.803	-0.999047	0.0776844	-11.0848	1.48699e-28	7.84494e-27
BTN3A3	16.2659	6.32414	26.2076	1.89328	0.186343	11.0656	1.84131e-28	9.69445e-27
BIRC2	64.4139	43.3704	85.4574	0.962389	0.102861	11.0323	2.66978e-28	1.40008e-26
TRIM5	48.2551	31.483	65.0271	1.02337	0.113004	11.0323	2.67007e-28	1.40008e-26
TJP2	216.676	158.288	275.063	0.793363	0.08795	11.0162	3.19393e-28	1.67138e-26
NAMPTP1	13.027	5.3204	20.7336	1.78184	0.189254	11.007	3.53767e-28	1.84752e-26
NEDD4L	159.18	102.681	215.679	1.0634	0.0931103	11.0043	3.64419e-28	1.89931e-26
NECAP2	41.0101	22.474	59.5462	1.36697	0.139794	10.9837	4.57815e-28	2.38128e-26
AC254813.2	6.14122	1.02638	11.2561	2.59651	0.414141	10.9603	5.92704e-28	3.0767e-26
ANKRD1	32.3834	16.2304	48.5364	1.52353	0.155932	10.923	8.94838e-28	4.63576e-26
HIST1H4A	147.586	263.228	31.9437	-3.00371	0.268904	-10.9182	9.43692e-28	4.87908e-26
HIST1H2BD	547.986	805.332	290.641	-1.46718	0.106237	-10.8686	1.62744e-27	8.39742e-26
EPN3	24.9717	38.1679	11.7753	-1.61631	0.16361	-10.8498	1.99883e-27	1.02932e-25
ISG15	38.7405	10.6825	66.7985	2.5369	0.253023	10.8426	2.16297e-27	1.11163e-25
AIDA	117.89	86.6705	149.109	0.775848	0.0891224	10.8089	3.12261e-27	1.60164e-25
KIF20A	61.2254	86.2938	36.157	-1.23224	0.105817	-10.7807	4.24529e-27	2.17317e-25
KRT80	35.4044	50.9314	19.8774	-1.31466	0.115938	-10.7802	4.2682e-27	2.18058e-25
UAP1	198.429	97.7896	299.069	1.60286	0.104992	10.7515	5.82944e-27	2.97233e-25
MSN	236.091	174	298.182	0.773666	0.0830434	10.7421	6.45751e-27	3.28608e-25
HEG1	19.4999	13.3946	25.6052	0.886186	0.1156	10.7401	6.59781e-27	3.34731e-25
ACE2	5.66775	1.94141	9.39409	1.82118	0.253699	10.74	6.60373e-27	3.34731e-25
HK1	140.887	103.965	177.81	0.76853	0.0853554	10.7041	9.73269e-27	4.92367e-25
SLC30A7	44.838	29.0411	60.6349	1.03681	0.106608	10.7008	1.00859e-26	5.09241e-25
GCLM	80.9336	55.2161	106.651	0.937305	0.096299	10.6868	1.17288e-26	5.91037e-25
UHMK1	90.429	66.8625	113.996	0.76089	0.0819366	10.644	1.86056e-26	9.35745e-25
ENKUR	3.38089	0.394614	6.36717	2.40125	0.41112	10.6428	1.88359e-26	9.45491e-25
FGFR2	21.1449	32.2383	10.0514	-1.58861	0.1472	-10.6353	2.0409e-26	1.02247e-24
MAP4K4	98.4894	66.4777	130.501	0.962591	0.0893184	10.6054	2.81406e-26	1.40709e-24
GPX3	42.9739	10.8135	75.1342	2.68811	0.274373	10.5992	3.00516e-26	1.49974e-24
AFF1	26.578	17.118	36.0381	1.03159	0.115116	10.5985	3.02697e-26	1.50771e-24
IFNAR2	34.2885	18.1676	50.4094	1.42336	0.145955	10.5847	3.51043e-26	1.74515e-24
CLDN12	45.8457	31.4037	60.2877	0.919437	0.121126	10.5813	3.63856e-26	1.80538e-24
HLA-DMA	13.71	3.95896	23.461	2.30237	0.303503	10.5623	4.45593e-26	2.20671e-24
TACSTD2	572.35	425.327	719.372	0.756782	0.0826448	10.5475	5.21837e-26	2.57935e-24
RDH10	19.0468	27.2704	10.8232	-1.25767	0.160642	-10.5307	6.23581e-26	3.07637e-24
CD44	1376.98	1008.91	1745.06	0.789874	0.0780506	10.5296	6.31039e-26	3.10724e-24
NCEH1	44.2733	30.5767	57.9699	0.901118	0.104013	10.5221	6.83477e-26	3.35904e-24
BRI3BP	28.529	39.4794	17.5785	-1.12355	0.100582	-10.5141	7.4379e-26	3.64852e-24
PANX1	51.9558	33.7231	70.1885	1.03575	0.111302	10.5077	7.96112e-26	3.89778e-24
MAN1A1	3.46913	1.0655	5.87276	1.7344	0.245563	10.4823	1.04168e-25	5.09042e-24
BASP1	51.439	30.5099	72.3681	1.21935	0.129183	10.468	1.21237e-25	5.9134e-24
MYL12A	242.901	161.995	323.807	0.994753	0.102506	10.4631	1.27619e-25	6.21296e-24
SIPA1L1	61.6185	42.0658	81.1713	0.932093	0.104319	10.4601	1.31747e-25	6.40184e-24
HIST4H4	333.09	482.409	183.77	-1.38751	0.113026	-10.4401	1.62702e-25	7.89119e-24
MAZ	86.2529	114.081	58.4248	-0.953514	0.108881	-10.4379	1.66433e-25	8.05705e-24
HEPHL1	2.43985	0.58088	4.29882	1.74494	0.287441	10.4203	2.00365e-25	9.68155e-24
PDGFRA	5.92146	0.953395	10.8895	2.60564	0.522728	10.4118	2.19017e-25	1.05473e-23
FAT3	2.19885	3.83857	0.559138	-1.63383	0.237224	-10.4118	2.19097e-25	1.05473e-23
JUN	14.4101	6.90151	21.9186	1.53632	0.171026	10.4039	2.38013e-25	1.14366e-23
HIST1H1A	52.4265	88.8165	16.0367	-2.39834	0.224752	-10.3975	2.54632e-25	1.22124e-23
FOXQ1	23.4537	36.0053	10.902	-1.63653	0.155075	-10.3689	3.43355e-25	1.64372e-23
HACD2	87.1488	116.207	58.0901	-0.988077	0.0901552	-10.3671	3.49927e-25	1.67208e-23
HIST1H2BJ	360.436	514.655	206.218	-1.31526	0.123991	-10.3603	3.7566e-25	1.79173e-23
MR1	46.7618	31.1997	62.324	0.975704	0.107673	10.3583	3.83528e-25	1.82589e-23
STOML1	12.2784	5.40762	19.1491	1.65285	0.183435	10.3543	3.99939e-25	1.90052e-23
SLFN12	33.1258	18.9614	47.2901	1.27452	0.143918	10.3531	4.05043e-25	1.92124e-23
PITPNM3	6.36093	10.2063	2.51554	-1.67249	0.172481	-10.3513	4.12747e-25	1.95399e-23
MEGF9	16.2564	23.4413	9.07146	-1.27905	0.121091	-10.3512	4.13458e-25	1.95399e-23
CALCOCO2	128.53	89.1522	167.907	0.905795	0.100299	10.3461	4.35873e-25	2.05616e-23
E2F2	13.0185	20.3905	5.64663	-1.68627	0.165457	-10.3397	4.65775e-25	2.19322e-23
NBN	55.5966	35.479	75.7142	1.07243	0.108457	10.3221	5.598e-25	2.63116e-23
CAP1	382.67	275.858	489.481	0.825047	0.0868101	10.3116	6.24651e-25	2.93065e-23
LINC00869	79.8273	24.7792	134.875	2.39801	0.199485	10.3104	6.32496e-25	2.96208e-23
SAA1	27.1668	5.74836	48.5852	2.8773	0.312703	10.3046	6.72034e-25	3.14155e-23
ZXDB	8.82317	4.77034	12.876	1.26586	0.149887	10.303	6.82877e-25	3.18647e-23
BCL2L14	9.78994	1.55288	18.027	2.89785	0.359912	10.2905	7.77893e-25	3.6233e-23
HR	29.9864	43.4076	16.5651	-1.3381	0.127736	-10.283	8.40297e-25	3.90693e-23
PRDM8	8.71512	2.02778	15.4024	2.43758	0.265918	10.2729	9.33106e-25	4.33065e-23
CCDC82	31.5521	17.7974	45.3068	1.30069	0.124096	10.2695	9.67087e-25	4.48032e-23
CCDC186	30.4725	19.562	41.383	1.0435	0.114924	10.2667	9.95449e-25	4.60346e-23
HIST1H4I	63.488	94.3371	32.6389	-1.50291	0.137689	-10.2559	1.11342e-24	5.13983e-23
CNDP2	171.645	114.978	228.312	0.983461	0.096295	10.2534	1.14205e-24	5.26259e-23
SLC9A9	16.1047	8.58723	23.6222	1.36077	0.205563	10.2475	1.21504e-24	5.58898e-23
BMP7	8.50737	14.2165	2.79819	-2.00226	0.240734	-10.2335	1.40322e-24	6.44311e-23
SHROOM3	29.6403	20.0938	39.1868	0.929904	0.10089	10.2332	1.40779e-24	6.45263e-23
UPK3BL1	33.6746	53.392	13.9571	-1.86257	0.179666	-10.2297	1.46002e-24	6.68019e-23
CCDC85B	23.1904	10.2988	36.0819	1.71454	0.188248	10.22	1.61364e-24	7.37002e-23
LIMA1	291.863	222.631	361.094	0.695241	0.0796331	10.2177	1.65281e-24	7.53559e-23
IL36G	7.49038	0.172566	14.8082	3.75293	0.628964	10.2151	1.69641e-24	7.72074e-23
ARHGAP25	11.8807	4.4838	19.2777	1.88664	0.225946	10.2055	1.87271e-24	8.50818e-23
OLR1	62.4645	43.1477	81.7813	0.906967	0.1143	10.2015	1.95269e-24	8.85597e-23
VEZT	141.088	99.5002	182.675	0.869958	0.0970358	10.197	2.04587e-24	9.26233e-23
SLC25A28	85.1799	51.2007	119.159	1.2028	0.138835	10.1888	2.22474e-24	1.00545e-22
TAB3	43.4151	30.4106	56.4197	0.870294	0.0932923	10.1865	2.27857e-24	1.02798e-22
NUCKS1	246.218	313.291	179.145	-0.802938	0.0780857	-10.175	2.56302e-24	1.1543e-22
BNIP3L	46.9676	28.8457	65.0896	1.1469	0.126499	10.1693	2.71747e-24	1.22173e-22
CFL2	87.2056	52.5977	121.814	1.19623	0.126203	10.1612	2.95484e-24	1.32614e-22
ITGB8	57.4124	40.9076	73.9172	0.838082	0.0986145	10.1573	3.07442e-24	1.37741e-22
TMED7-TICAM2	9.92458	4.44006	15.4091	1.5928	0.193247	10.1545	3.16473e-24	1.41542e-22
SETX	58.9908	43.9374	74.0443	0.739826	0.0868343	10.1453	3.4774e-24	1.55258e-22
MICAL2	78.4277	52.4446	104.411	0.979907	0.108957	10.1145	4.76372e-24	2.12322e-22
TNFRSF10B	48.52	31.9324	65.1076	1.00531	0.115561	10.1129	4.84438e-24	2.15546e-22
TNFSF15	11.2566	6.50637	16.0068	1.17992	0.14152	10.1093	5.02319e-24	2.22988e-22
EIF2AK2	132.708	83.1831	182.232	1.12207	0.0830439	10.1092	5.02889e-24	2.22988e-22
SNX9	29.2194	19.0111	39.4278	1.01455	0.115135	10.0841	6.49672e-24	2.8758e-22
BCAP29	117.653	74.5191	160.786	1.09918	0.110793	10.0784	6.88509e-24	3.0425e-22
PTPRE	15.1549	8.54476	21.765	1.25404	0.157891	10.0663	7.78383e-24	3.43378e-22
IFIT1	54.3021	32.7221	75.8821	1.18895	0.127248	10.0458	9.58921e-24	4.22301e-22
BBX	90.9193	61.2171	120.621	0.967015	0.0895521	10.0455	9.61988e-24	4.22931e-22
MTSS1L	32.3265	45.3871	19.2658	-1.19468	0.132562	-10.0347	1.07305e-23	4.70958e-22
SLC41A2	29.7864	15.8593	43.7135	1.40717	0.161557	10.0128	1.33849e-23	5.86463e-22
FAM49A	8.49773	14.6615	2.33401	-2.23189	0.220765	-10.0105	1.37124e-23	5.99796e-22
VPS13C	43.2166	30.8051	55.6281	0.832259	0.0943433	10.0092	1.3884e-23	6.06277e-22
MUC4	0.336175	0.032377	0.639973	0.667702	0.45573	10.0082	1.40242e-23	6.11364e-22
GCSH	57.6583	87.4256	27.8911	-1.61384	0.152346	-10.0054	1.44356e-23	6.28242e-22
PCYT1A	161.012	114.396	207.627	0.854336	0.0883453	10.003	1.47911e-23	6.42628e-22
EHBP1L1	52.4157	34.4555	70.3758	1.00943	0.102656	9.99971	1.52843e-23	6.62942e-22
PNPO	45.7184	63.5282	27.9085	-1.15844	0.113798	-9.97045	2.05305e-23	8.89e-22
CYB5R1	79.7087	52.563	106.855	1.00978	0.121362	9.96935	2.07593e-23	8.97407e-22
TMEM200A	5.53094	1.77116	9.29071	1.89278	0.25727	9.96309	2.21077e-23	9.54102e-22
ENC1	40.3422	28.5201	52.1645	0.848767	0.109176	9.9594	2.29454e-23	9.88601e-22
RAB43	9.41962	3.02878	15.8104	2.06094	0.255414	9.958	2.32688e-23	1.00087e-21
ARHGAP20	1.02399	0.0637975	1.98418	1.48811	0.542264	9.9576	2.33644e-23	1.00331e-21
NEK7	78.3895	56.973	99.806	0.798128	0.110531	9.95379	2.42765e-23	1.04075e-21
RAB27A	51.1413	26.5383	75.7443	1.47862	0.140896	9.95127	2.48985e-23	1.06565e-21
ZNF318	15.2522	9.8833	20.6212	0.990327	0.116919	9.89542	4.35782e-23	1.86205e-21
CSF2	11.8098	1.24165	22.3781	3.38252	0.434036	9.89064	4.57107e-23	1.94994e-21
LDHA	2356.05	1748.98	2963.12	0.760265	0.0856376	9.87293	5.45493e-23	2.32315e-21
SCN9A	7.96915	3.66679	12.2715	1.50783	0.195997	9.86609	5.83944e-23	2.48282e-21
HIST1H2AD	165.291	269.855	60.7261	-2.13357	0.206075	-9.84089	7.50469e-23	3.18561e-21
BST2	10.9503	0.105787	21.7949	4.36556	0.790549	9.83433	8.01002e-23	3.39454e-21
GALNT7	38.7083	52.9658	24.4508	-1.08433	0.113119	-9.83004	8.35817e-23	3.53629e-21
KLHL13	11.8675	19.3956	4.33926	-1.93355	0.18967	-9.81584	9.62336e-23	4.06492e-21
NUMB	77.586	53.4804	101.692	0.914506	0.108062	9.80437	1.07814e-22	4.54664e-21
SLC3A2	298.554	400.37	196.738	-1.02134	0.104068	-9.79379	1.19728e-22	5.04086e-21
RNF24	23.8209	15.3686	32.2734	1.02344	0.113155	9.78915	1.25342e-22	5.26865e-21
MAP2K3	68.6675	42.7149	94.62	1.12919	0.13357	9.78588	1.29461e-22	5.43294e-21
SQSTM1	393.597	290.027	497.166	0.775473	0.0904552	9.78314	1.3302e-22	5.57326e-21
CD40	9.39854	2.63782	16.1593	2.23784	0.301989	9.77807	1.3985e-22	5.84993e-21
BCAR3	76.8369	52.9312	100.743	0.915731	0.112098	9.75991	1.67308e-22	6.98722e-21
POMP	273.611	199.309	347.913	0.800642	0.0947906	9.75692	1.72306e-22	7.18433e-21
MYO6	35.7075	24.9751	46.44	0.868975	0.0998279	9.75508	1.75459e-22	7.30402e-21
HIST1H3J	140.178	227.131	53.2253	-2.07283	0.200333	-9.75024	1.84042e-22	7.64898e-21
DHX58	8.59131	2.34483	14.8378	2.24337	0.312695	9.72968	2.25306e-22	9.34893e-21
CELSR2	10.1341	14.6389	5.62939	-1.23819	0.12804	-9.72372	2.38901e-22	9.89715e-21
CREG2	29.0481	42.2768	15.8194	-1.36347	0.163158	-9.71889	2.50486e-22	1.03605e-20
CPA4	8.41422	15.3029	1.52554	-2.69046	0.322406	-9.70677	2.82142e-22	1.16512e-20
SLC29A3	12.3836	20.1366	4.63054	-1.9084	0.208926	-9.70572	2.85054e-22	1.17415e-20
HYOU1	109.908	78.7464	141.07	0.833106	0.0965486	9.70566	2.85237e-22	1.17415e-20
HLA-DPA1	5.28578	0.038865	10.5327	3.47265	0.642055	9.69878	3.05126e-22	1.25403e-20
NCOA3	55.4739	41.1281	69.8197	0.74937	0.0930062	9.67728	3.76604e-22	1.54533e-20
RAB8B	24.705	13.9628	35.447	1.28442	0.156275	9.66805	4.12151e-22	1.68851e-20
KARS	392.413	295.779	489.046	0.723527	0.0869654	9.66705	4.16218e-22	1.70248e-20
ETS2	73.463	48.7865	98.1394	0.993706	0.106531	9.66352	4.30806e-22	1.75936e-20
RRBP1	131.448	97.8021	165.095	0.74939	0.0855312	9.65144	4.84683e-22	1.97627e-20
IRAK2	1.92578	0.200474	3.65109	1.95396	0.447727	9.64038	5.39903e-22	2.19796e-20
ITPR2	22.3223	15.9344	28.7101	0.810997	0.102345	9.63921	5.46056e-22	2.21951e-20
RCN2	59.2811	85.5538	33.0085	-1.3477	0.12449	-9.63524	5.67584e-22	2.30339e-20
SORL1	41.4278	52.8634	29.9922	-0.797398	0.0896135	-9.62701	6.14923e-22	2.49159e-20
PAPSS2	14.6042	22.889	6.31944	-1.70654	0.171413	-9.62093	6.52394e-22	2.63929e-20
KRT18	752.847	547.54	958.154	0.806165	0.0951115	9.61911	6.64007e-22	2.68207e-20
TRPV6	6.88731	11.1393	2.6353	-1.73954	0.205537	-9.60823	7.38057e-22	2.97652e-20
TNFRSF10A	39.8935	24.6177	55.1694	1.13265	0.126787	9.60261	7.79463e-22	3.13861e-20
MATN2	54.5586	76.3521	32.7651	-1.19591	0.114111	-9.58974	8.83096e-22	3.54486e-20
NFKBIZ	59.832	31.9852	87.6787	1.42677	0.131371	9.58216	9.50358e-22	3.80895e-20
CEP170	10.073	5.92512	14.2209	1.13614	0.142611	9.57501	1.01852e-21	4.07582e-20
PSMA4	792.112	617.601	966.625	0.645439	0.083721	9.57184	1.05017e-21	4.19598e-20
SLC28A3	3.55948	0.076946	7.04202	2.90061	0.799876	9.56049	1.17198e-21	4.67543e-20
GLB1L2	15.8602	24.1679	7.55246	-1.55717	0.160768	-9.55763	1.20488e-21	4.79929e-20
PTCH1	33.234	48.9183	17.5497	-1.42817	0.132922	-9.54969	1.30081e-21	5.17344e-20
PCLAF	145.212	211.417	79.0076	-1.40869	0.124998	-9.54315	1.38556e-21	5.50203e-20
KCTD11	17.0667	8.40943	25.724	1.50596	0.178659	9.5306	1.56375e-21	6.20009e-20
KCNK1	80.5066	58.4772	102.536	0.799724	0.111059	9.528	1.60336e-21	6.34737e-20
VMP1	272.644	212.635	332.653	0.6432	0.0846272	9.46996	2.79953e-21	1.10659e-19
STX11	6.53611	1.55141	11.5208	2.29496	0.318678	9.45192	3.32664e-21	1.31293e-19
KLK7	15.0032	24.4247	5.58177	-1.94968	0.212342	-9.43925	3.75473e-21	1.47963e-19
USO1	56.227	40.08	72.3739	0.83683	0.101893	9.43704	3.83445e-21	1.50874e-19
ZBED2	56.8312	38.2273	75.4351	0.962376	0.115837	9.43149	4.04318e-21	1.58845e-19
SMAD6	16.9738	24.2242	9.72347	-1.23403	0.143556	-9.42509	4.29737e-21	1.68576e-19
LYST	32.7767	23.9202	41.6332	0.774659	0.104434	9.42467	4.31453e-21	1.68992e-19
KDSR	152.576	106.062	199.089	0.902185	0.0951163	9.41131	4.90013e-21	1.91639e-19
CDH1	254.571	200.976	308.166	0.614198	0.0788729	9.40139	5.38456e-21	2.10266e-19
SAV1	43.5999	30.3376	56.8622	0.884729	0.116816	9.39715	5.60605e-21	2.18585e-19
TNFSF14	2.4914	0.396259	4.58654	2.00039	0.370149	9.39145	5.91818e-21	2.30408e-19
VCPIP1	15.4407	10.6769	20.2046	0.86072	0.109621	9.38987	6.00762e-21	2.33538e-19
NCOA7	87.055	69.0135	105.097	0.599673	0.0980548	9.37171	7.1367e-21	2.77013e-19
GCA	15.0667	5.0923	25.041	2.09573	0.261125	9.371	7.1851e-21	2.78474e-19
GJB3	61.4175	39.6026	83.2323	1.0528	0.128034	9.35327	8.49788e-21	3.2886e-19
IL15RA	32.8886	18.0648	47.7122	1.35337	0.17146	9.34979	8.78211e-21	3.39352e-19
ACSL4	40.4752	27.4958	53.4547	0.934308	0.128582	9.34878	8.86616e-21	3.42088e-19
HMGN2	501.608	675.58	327.637	-1.04177	0.098726	-9.34834	8.90367e-21	3.43023e-19
CLUHP3	21.8934	12.4017	31.3851	1.27291	0.15031	9.34415	9.26337e-21	3.5635e-19
RAB31	30.5914	19.0608	42.1219	1.10404	0.12811	9.31445	1.2258e-20	4.70152e-19
UPP1	86.4504	54.2243	118.677	1.11576	0.133352	9.31014	1.27659e-20	4.88905e-19
FKBP1A	440.489	322.935	558.043	0.787255	0.0941441	9.30876	1.29333e-20	4.94585e-19
RRAGC	57.628	39.3113	75.9447	0.932638	0.112826	9.30634	1.3231e-20	5.0522e-19
IRF7	9.39263	3.12075	15.6645	2.0158	0.299874	9.30506	1.33911e-20	5.10579e-19
AC244669.1	78.054	31.6456	124.463	1.9423	0.219547	9.29418	1.48349e-20	5.64797e-19
SH3TC2	19.0535	10.2405	27.8665	1.36069	0.154057	9.28742	1.58079e-20	6.00957e-19
NPC1	109.598	86.0416	133.154	0.624108	0.0943316	9.27503	1.7757e-20	6.73085e-19
WNT10A	27.8595	42.1519	13.5671	-1.56671	0.161275	-9.27503	1.77573e-20	6.73085e-19
NCAPD2	90.9468	120.389	61.5041	-0.957621	0.0865407	-9.27154	1.83478e-20	6.94448e-19
LRP10	27.8834	19.1349	36.6319	0.902259	0.113336	9.26156	2.01474e-20	7.61447e-19
GVINP1	1.03319	0.215959	1.85043	1.22908	0.349878	9.25329	2.17679e-20	8.21492e-19
CLSTN3	35.1634	20.4977	49.8291	1.24147	0.166371	9.23744	2.5246e-20	9.51361e-19
MMD	9.41601	3.94088	14.8911	1.68538	0.236764	9.22822	2.75157e-20	1.03538e-18
SCRN1	107.085	83.2489	130.921	0.646944	0.0852551	9.22142	2.93179e-20	1.10159e-18
GSTO1	220.697	145.671	295.723	1.01653	0.123462	9.21144	3.21771e-20	1.20552e-18
SPAG9	135.468	97.6116	173.325	0.821949	0.0842368	9.20969	3.27079e-20	1.22253e-18
ITGA4	26.8618	38.1187	15.605	-1.23624	0.126521	-9.20963	3.27258e-20	1.22253e-18
MED13	78.492	60.5111	96.4729	0.664155	0.0893474	9.20872	3.30026e-20	1.2311e-18
ANKRD12	34.6352	23.7098	45.5607	0.914025	0.137999	9.20463	3.42862e-20	1.27713e-18
GAB1	18.124	12.3667	23.8812	0.896404	0.156074	9.20409	3.4459e-20	1.28172e-18
RBCK1	100.728	63.0323	138.424	1.12261	0.126206	9.20171	3.52306e-20	1.30854e-18
PNPLA8	26.6291	16.6201	36.638	1.09497	0.140683	9.19918	3.607e-20	1.3378e-18
TICAM1	16.172	8.03589	24.3081	1.48586	0.186423	9.19376	3.79361e-20	1.40499e-18
SOCS1	6.18396	0.57841	11.7895	3.01842	0.478371	9.17838	4.37635e-20	1.6185e-18
ELOVL7	10.9734	4.92419	17.0227	1.60513	0.1782	9.17675	4.443e-20	1.6408e-18
CD7	3.9606	0.386354	7.53485	2.62207	0.500049	9.16995	4.73225e-20	1.74513e-18
HIST1H2BO	381.952	555.104	208.799	-1.40634	0.139337	-9.16367	5.01634e-20	1.84726e-18
RRM2	185.229	240.793	129.665	-0.887905	0.0892165	-9.1612	5.13237e-20	1.88605e-18
LAMB3	235.198	177.254	293.142	0.722582	0.094468	9.16112	5.13627e-20	1.88605e-18
GOLGB1	36.9005	25.7605	48.0404	0.873863	0.116045	9.14758	5.8223e-20	2.13431e-18
HIST1H2BK	459.28	660.354	258.205	-1.35133	0.133856	-9.14746	5.82887e-20	2.13431e-18
NAGK	64.2991	38.7766	89.8217	1.19112	0.143642	9.14577	5.9204e-20	2.16476e-18
TCAF2	3.81837	1.35282	6.28392	1.63032	0.23615	9.13722	6.40783e-20	2.33967e-18
ACTN1	169.552	124.323	214.781	0.783911	0.0917727	9.13427	6.58505e-20	2.40099e-18
NRP1	48.2749	35.3479	61.2019	0.775088	0.106023	9.13001	6.84951e-20	2.4939e-18
ST5	97.6188	78.8391	116.398	0.556248	0.119986	9.12148	7.41045e-20	2.69434e-18
PHLDB2	234.651	177.377	291.925	0.7156	0.0862987	9.11728	7.70339e-20	2.79691e-18
RELA	50.2578	32.8413	67.6743	1.02099	0.126675	9.09479	9.47697e-20	3.43603e-18
GPC1	31.5735	43.8133	19.3337	-1.14005	0.128523	-9.09323	9.61427e-20	3.48093e-18
THSD1	11.2816	5.74127	16.8219	1.40255	0.18228	9.09076	9.83528e-20	3.55597e-18
FRMD3	3.87625	1.48791	6.26459	1.54595	0.249437	9.07328	1.15484e-19	4.16952e-18
HIST1H4L	249.018	393.194	104.841	-1.897	0.197151	-9.06985	1.19177e-19	4.29686e-18
TNKS2	39.4643	28.91	50.0185	0.770392	0.0993624	9.06647	1.22934e-19	4.42615e-18
NFAT5	75.1314	60.2585	90.0043	0.571023	0.0878867	9.05212	1.40214e-19	5.04128e-18
ABL2	74.5815	58.2343	90.9287	0.634083	0.0863702	9.05149	1.41034e-19	5.06371e-18
TINCR	15.0698	22.7231	7.41649	-1.495	0.186508	-9.0458	1.48569e-19	5.32686e-18
CALD1	47.9389	35.5001	60.3777	0.749816	0.113726	9.04205	1.53763e-19	5.50545e-18
RAP1B	237.486	177.117	297.854	0.746622	0.0934095	9.03718	1.60767e-19	5.74826e-18
FAM102B	5.37186	8.20522	2.5385	-1.37931	0.199496	-9.0319	1.68714e-19	6.02406e-18
GJB4	6.02783	2.07525	9.98041	1.83616	0.262098	9.02441	1.80663e-19	6.44181e-18
CLIP1	102.223	83.7388	120.708	0.522329	0.0850687	9.01917	1.89524e-19	6.74847e-18
PIK3C2A	49.3383	36.762	61.9147	0.736462	0.100775	9.01236	2.01676e-19	7.17128e-18
CDKN3	139.643	201.676	77.6108	-1.36638	0.130119	-8.99587	2.34372e-19	8.32245e-18
GIMAP2	10.2617	3.39211	17.1313	2.04549	0.305688	8.98506	2.58603e-19	9.17029e-18
CYTH1	48.1054	28.3508	67.8599	1.23027	0.129434	8.97912	2.72943e-19	9.66553e-18
AC245100.4	17.1281	6.04071	28.2154	2.05294	0.263045	8.97227	2.90473e-19	1.02722e-17
BCL2L1	91.0609	65.9828	116.139	0.806359	0.110271	8.96446	3.11802e-19	1.10115e-17
UBR1	41.7939	32.1337	51.4541	0.662753	0.104967	8.95413	3.42423e-19	1.20764e-17
YPEL5	38.5687	24.3651	52.7722	1.08401	0.134338	8.94687	3.65711e-19	1.28801e-17
TRIB2	5.59845	1.94485	9.25206	1.79965	0.265468	8.93016	4.25407e-19	1.49622e-17
GNA15	36.8402	23.5758	50.1046	1.05622	0.13512	8.92006	4.6603e-19	1.63687e-17
RICTOR	37.2676	28.3887	46.1465	0.681889	0.0975856	8.90036	5.56652e-19	1.95251e-17
CCNA2	50.0297	68.4676	31.5919	-1.09183	0.112582	-8.88951	6.13792e-19	2.15002e-17
SERPINB10	5.76272	1.14588	10.3796	2.4068	0.371908	8.8793	6.72821e-19	2.3536e-17
HSP90B1	551.041	442.885	659.197	0.572712	0.0793511	8.86335	7.76476e-19	2.71253e-17
ACACA	34.6873	44.0932	25.2814	-0.778866	0.0958781	-8.84709	8.98269e-19	3.13376e-17
BCL6	12.9455	5.79473	20.0964	1.63451	0.195226	8.84206	9.397e-19	3.27388e-17
KIAA0040	65.6006	48.9851	82.2161	0.735363	0.103059	8.83564	9.95229e-19	3.46267e-17
JAG2	38.9999	53.5175	24.4823	-1.09723	0.125262	-8.8242	1.1024e-18	3.83041e-17
MMP14	135.738	91.6179	179.858	0.965498	0.100689	8.81972	1.14745e-18	3.98158e-17
BCAT1	20.6789	27.4332	13.9245	-0.929887	0.127036	-8.81168	1.2328e-18	4.27199e-17
C1RL	40.4573	25.9089	55.0059	1.0575	0.15842	8.80483	1.31047e-18	4.53508e-17
RIOK3	99.6392	76.3254	122.953	0.68078	0.0948071	8.80121	1.35354e-18	4.67787e-17
B4GALT1	49.8844	36.5275	63.2413	0.775551	0.10233	8.79967	1.37219e-18	4.73597e-17
IFI44L	3.93434	0.462428	7.40625	2.5231	0.330277	8.79792	1.39381e-18	4.80417e-17
STOM	15.3325	7.83	22.835	1.4326	0.18118	8.79183	1.47144e-18	5.065e-17
DHFR	98.5089	125.231	71.7864	-0.794331	0.0997255	-8.78218	1.6033e-18	5.51157e-17
TGFB1	34.2779	21.5542	47.0016	1.08968	0.137306	8.76932	1.79743e-18	6.16251e-17
TLR3	15.3868	8.23634	22.5372	1.34955	0.17263	8.76544	1.86049e-18	6.37026e-17
BTG1	29.2268	18.9458	39.5078	1.02211	0.120911	8.76465	1.87353e-18	6.40644e-17
DHRS7	75.9801	49.2197	102.74	1.04666	0.127476	8.76281	1.9044e-18	6.50338e-17
ZMIZ2	41.2565	30.0003	52.5128	0.787604	0.115406	8.74993	2.13482e-18	7.28064e-17
MYD88	28.5518	18.4085	38.6951	1.03227	0.13585	8.74767	2.1781e-18	7.41845e-17
HIVEP1	25.2816	18.5724	31.9908	0.753245	0.121944	8.74256	2.27882e-18	7.75128e-17
GCC2	32.3537	23.5271	41.1802	0.782189	0.137113	8.73893	2.35327e-18	7.99401e-17
BHLHE41	9.51824	16.0956	2.94082	-2.11706	0.251085	-8.73368	2.46519e-18	8.36321e-17
FAT2	58.1594	74.1136	42.2053	-0.797865	0.0798702	-8.73318	2.47603e-18	8.38896e-17
CXCL1	68.1832	41.9909	94.3755	1.14959	0.144915	8.7161	2.87949e-18	9.74316e-17
GCLC	93.9526	124.171	63.7341	-0.951301	0.100073	-8.70622	3.1417e-18	1.06165e-16
SMG1P1	90.5001	64.8276	116.172	0.83187	0.102586	8.70575	3.15485e-18	1.0647e-16
LCP1	5.12251	1.38166	8.86336	2.05011	0.265004	8.70381	3.20926e-18	1.08165e-16
CD2AP	49.5363	36.1831	62.8895	0.780933	0.111175	8.69572	3.44641e-18	1.16007e-16
FAM78B	2.22109	0.300636	4.14154	1.98298	0.421661	8.69128	3.5838e-18	1.20474e-16
NR2F1	7.29603	11.6704	2.92165	-1.69193	0.233048	-8.69058	3.60589e-18	1.21059e-16
RNASE7	8.02506	1.82822	14.2219	2.42818	0.344686	8.67901	3.99232e-18	1.33859e-16
RAB3IP	81.3153	50.4226	112.208	1.1385	0.108468	8.6689	4.36321e-18	1.46105e-16
MSMO1	57.4798	37.74	77.2197	1.01371	0.127278	8.65865	4.77401e-18	1.59654e-16
AREG	37.837	20.878	54.7959	1.35068	0.176796	8.65732	4.82972e-18	1.61309e-16
CHD3	48.5037	64.5923	32.4151	-0.973024	0.0996382	-8.65009	5.14581e-18	1.71644e-16
WSB1	74.9386	52.2264	97.6509	0.89019	0.109403	8.64934	5.17962e-18	1.72549e-16
LY75	7.89819	4.44383	11.3526	1.18212	0.183429	8.6489	5.19967e-18	1.72994e-16
CASP7	42.4195	28.4561	56.3829	0.962057	0.125662	8.63217	6.01989e-18	2.00026e-16
MITD1	95.4713	62.4352	128.507	1.02968	0.129772	8.62873	6.20368e-18	2.05868e-16
HOXC12	8.6559	13.5077	3.8041	-1.59448	0.199038	-8.62036	6.67419e-18	2.21198e-16
AMOTL2	83.3607	61.1245	105.597	0.778933	0.109224	8.61916	6.74494e-18	2.23257e-16
DCUN1D3	21.2484	13.4382	29.0587	1.0579	0.126666	8.61102	7.24146e-18	2.39385e-16
MYO1G	2.4079	0.543915	4.27189	1.77173	0.372992	8.6029	7.77278e-18	2.56621e-16
GFPT1	42.9263	31.8742	53.9784	0.741909	0.0926391	8.60228	7.81456e-18	2.57671e-16
TEX29	7.96725	0.19565	15.7388	3.80733	0.773784	8.5989	8.0483e-18	2.6504e-16
PIK3C2B	18.1354	26.6703	9.60048	-1.38421	0.130438	-8.59754	8.14451e-18	2.67867e-16
PNRC1	34.9066	22.6835	47.1298	1.02305	0.151378	8.58903	8.77029e-18	2.88082e-16
CCL22	4.06484	1.26914	6.86052	1.79248	0.296363	8.58786	8.86069e-18	2.90682e-16
ACER3	43.3722	28.9065	57.8379	0.976285	0.107043	8.586	9.00526e-18	2.95051e-16
LIPA	261.407	301.332	221.482	-0.442448	0.0901876	-8.58325	9.22258e-18	3.01789e-16
HK2	27.3692	19.4067	35.3317	0.832184	0.117832	8.57589	9.8323e-18	3.21333e-16
PROM2	33.8246	45.2617	22.3877	-0.98407	0.115084	-8.57359	1.00308e-17	3.27407e-16
HIST3H2BB	37.3063	52.2369	22.3757	-1.18742	0.129433	-8.56749	1.05762e-17	3.44774e-16
NMU	193.787	270.014	117.561	-1.19274	0.125	-8.55955	1.13306e-17	3.68901e-16
EPB41L5	32.0721	18.4886	45.6557	1.25943	0.141379	8.53476	1.40446e-17	4.56687e-16
GNPTAB	52.4997	41.1148	63.8845	0.623547	0.0985262	8.53059	1.45602e-17	4.72859e-16
SDR16C5	13.5537	6.54307	20.5644	1.51542	0.206172	8.5292	1.47364e-17	4.77982e-16
C6orf62	81.5771	61.852	101.302	0.702806	0.0934432	8.52868	1.4803e-17	4.79538e-16
UNC119B	19.2338	27.1153	11.3521	-1.1866	0.136698	-8.51695	1.6381e-17	5.29995e-16
UACA	71.7928	53.8586	89.727	0.725814	0.0997263	8.51636	1.64651e-17	5.32049e-16
SLC37A3	31.1481	21.0002	41.2961	0.943006	0.138542	8.515	1.66594e-17	5.37656e-16
ABCC5	43.6418	58.511	28.7725	-0.999174	0.105639	-8.5114	1.71842e-17	5.539e-16
ATP13A3	143.608	111.509	175.708	0.651323	0.0872613	8.50525	1.81205e-17	5.83352e-16
CPEB2	9.2286	4.61111	13.8461	1.40373	0.188267	8.50475	1.81985e-17	5.85136e-16
ASAP1	63.0904	49.4156	76.7652	0.625256	0.0999798	8.48906	2.08314e-17	6.6896e-16
ZFP36L2	53.1421	38.2907	67.9934	0.812272	0.110466	8.48799	2.10246e-17	6.74326e-16
PKP4	80.8316	57.9488	103.715	0.828927	0.0971858	8.48469	2.16298e-17	6.92877e-16
NFKBIE	13.5958	5.18529	22.0064	1.89512	0.255944	8.47849	2.28134e-17	7.29886e-16
TGFA	100.543	42.5549	158.531	1.87293	0.234846	8.47521	2.34662e-17	7.49844e-16
C1orf68	8.83086	0.0872275	17.5745	4.0946	0.916062	8.47473	2.35616e-17	7.51963e-16
UGT1A6	236.943	307.596	166.291	-0.883362	0.096933	-8.47449	2.36114e-17	7.52624e-16
PELI1	16.4859	9.7339	23.2379	1.17509	0.161708	8.45054	2.89969e-17	9.23152e-16
HCAR3	10.8571	4.80156	16.9127	1.62647	0.229029	8.44392	3.06873e-17	9.75766e-16
RAB18	150.98	104.236	197.725	0.917141	0.102675	8.44018	3.16838e-17	1.00621e-15
C5	25.9806	36.861	15.1	-1.23365	0.130533	-8.43988	3.17669e-17	1.00761e-15
C15orf48	15.3706	2.76993	27.9713	2.94201	0.384224	8.43943	3.18876e-17	1.01021e-15
PHLDA1	183.986	79.4124	288.56	1.84837	0.232242	8.43427	3.33273e-17	1.05452e-15
ZFP36	24.6987	12.7927	36.6048	1.44702	0.185945	8.42981	3.46238e-17	1.0942e-15
PSAT1	127.579	170.333	84.826	-0.997317	0.106891	-8.41639	3.88265e-17	1.22552e-15
JUNB	73.7634	50.5134	97.0134	0.928032	0.124225	8.41493	3.93145e-17	1.23941e-15
TTBK2	20.0939	13.0427	27.1452	1.00307	0.117993	8.41282	4.00263e-17	1.26032e-15
KDM3A	49.5651	34.118	65.0121	0.910518	0.112066	8.41037	4.08714e-17	1.28536e-15
ODC1	36.062	50.7621	21.3618	-1.21086	0.142859	-8.4034	4.33734e-17	1.36239e-15
HSD11B1	5.63151	0.582503	10.6805	2.88382	0.495639	8.39734	4.56696e-17	1.43277e-15
BCAR1	12.7554	6.71483	18.796	1.3595	0.193364	8.3864	5.01249e-17	1.57064e-15
HMGB1	714.359	901.851	526.866	-0.774315	0.0804217	-8.38414	5.10991e-17	1.59923e-15
TGFBR1	56.8779	40.6669	73.0888	0.830355	0.105363	8.37836	5.36723e-17	1.67773e-15
FNBP4	166.469	123.117	209.821	0.764321	0.0991343	8.35929	6.3099e-17	1.97002e-15
PHLDA2	57.519	31.1099	83.9282	1.40322	0.185581	8.35679	6.44454e-17	2.00962e-15
NDC1	36.226	48.5343	23.9176	-0.99126	0.102478	-8.35579	6.49958e-17	2.02434e-15
HRNR	1.35979	2.32675	0.392831	-1.25609	0.298411	-8.35395	6.60187e-17	2.05373e-15
SPART	130.757	98.1864	163.328	0.728369	0.0964401	8.34774	6.95819e-17	2.16197e-15
CASK	49.5875	65.2096	33.9654	-0.92111	0.108139	-8.3448	7.1337e-17	2.21384e-15
ARHGEF2	96.7383	70.2311	123.246	0.802613	0.101017	8.34053	7.39563e-17	2.29238e-15
LRRFIP1	90.958	72.9536	108.963	0.57232	0.0911014	8.33218	7.93704e-17	2.45725e-15
ANKRD22	33.5226	20.3245	46.7206	1.1621	0.158292	8.32949	8.11917e-17	2.51063e-15
KHNYN	26.7546	17.8505	35.6587	0.959547	0.113244	8.32854	8.1844e-17	2.52778e-15
BIRC5	72.2485	96.3426	48.1544	-0.98575	0.108527	-8.32654	8.3241e-17	2.56786e-15
ARRDC3	25.1981	35.4796	14.9168	-1.19654	0.160358	-8.32552	8.3956e-17	2.58683e-15
MTRNR2L8	5.06203	9.72307	0.400991	-2.9362	0.539771	-8.32468	8.45564e-17	2.60222e-15
SEMA4B	43.144	32.2176	54.0703	0.729326	0.123687	8.3154	9.14415e-17	2.81077e-15
EML5	6.17165	8.76123	3.58206	-1.09107	0.167903	-8.30776	9.75279e-17	2.99429e-15
BDNF	4.0271	6.63331	1.4209	-1.65676	0.257304	-8.30337	1.01196e-16	3.10323e-15
UBD	1797.81	0.087729	3595.53	11.6911	1.95	8.30013	1.04e-16	3.18543e-15
COL17A1	440.098	345.568	534.626	0.628087	0.0825707	8.29726	1.06542e-16	3.25942e-15
DYRK4	78.4947	45.5864	111.403	1.2707	0.167057	8.29185	1.11496e-16	3.40697e-15
CDH3	314.325	243.648	385.002	0.657903	0.0871252	8.28406	1.19046e-16	3.63335e-15
CBR3	61.5053	40.0686	82.942	1.03136	0.141573	8.26967	1.34326e-16	4.09487e-15
RRM1	161.729	210.111	113.347	-0.88459	0.0867998	-8.26361	1.41336e-16	4.3035e-15
PPFIBP1	117.492	94.6502	140.333	0.563258	0.0885613	8.26031	1.453e-16	4.41899e-15
DUSP7	31.3807	21.495	41.2664	0.909909	0.127312	8.2502	1.58126e-16	4.80343e-15
AP000295.1	6.30903	3.24232	9.37575	1.29029	0.213767	8.23369	1.81533e-16	5.50251e-15
SERPINE2	27.2711	14.7395	39.8026	1.37427	0.164942	8.23367	1.81565e-16	5.50251e-15
THSD4	21.0224	16.6771	25.3679	0.576902	0.112016	8.2259	1.93729e-16	5.86428e-15
FBP1	20.3128	31.2628	9.36275	-1.63846	0.220574	-8.22533	1.94651e-16	5.88528e-15
HMGCS1	85.6419	62.8882	108.395	0.775931	0.106981	8.21743	2.07914e-16	6.27897e-15
CD68	20.435	8.74601	32.1239	1.76499	0.2262	8.21598	2.10432e-16	6.34758e-15
STAP2	77.7092	49.4464	105.972	1.08441	0.136292	8.21548	2.11319e-16	6.3669e-15
DIS3	50.2142	37.3152	63.1132	0.742705	0.0990627	8.20588	2.28909e-16	6.88886e-15
UBXN4	115.437	87.2634	143.61	0.712281	0.0924801	8.19737	2.45695e-16	7.38541e-15
RAB27B	44.4991	33.2058	55.7924	0.731457	0.095426	8.19276	2.55308e-16	7.66547e-15
CALR	479.865	379.709	580.021	0.609902	0.0889936	8.18146	2.80427e-16	8.40988e-15
EHD1	53.3336	36.0174	70.6498	0.952757	0.126734	8.16548	3.20159e-16	9.59032e-15
SLC2A6	10.1076	4.31009	15.9052	1.67065	0.240823	8.16124	3.31615e-16	9.92196e-15
ACTR3	233.05	183.561	282.539	0.619449	0.0846446	8.15922	3.37186e-16	1.0077e-14
AKR1C2	39.486	57.4505	21.5214	-1.37592	0.167747	-8.15121	3.60305e-16	1.07555e-14
DNAJC3	39.59	29.8712	49.3088	0.70455	0.0972718	8.14375	3.83216e-16	1.14262e-14
ATP1B3	248.288	317.841	178.734	-0.826976	0.0899554	-8.14339	3.8435e-16	1.14468e-14
CEBPB	27.0336	15.9872	38.0799	1.20198	0.167102	8.13213	4.21813e-16	1.25481e-14
MIB1	28.3588	36.1198	20.5977	-0.781313	0.0993128	-8.12882	4.33488e-16	1.28806e-14
ASB2	2.39228	0.259175	4.52538	2.1336	0.612258	8.12862	4.34209e-16	1.28872e-14
ESM1	2.51168	0.152219	4.87115	2.34923	0.692007	8.12661	4.41475e-16	1.30878e-14
BTN3A1	13.7411	7.5991	19.883	1.28007	0.191079	8.12348	4.52998e-16	1.3414e-14
MCM10	45.9529	62.0079	29.898	-1.02802	0.116444	-8.11788	4.74385e-16	1.402e-14
N4BP1	92.4815	68.075	116.888	0.771182	0.0983277	8.11784	4.74547e-16	1.402e-14
C19orf66	11.075	5.15813	16.9918	1.54678	0.234875	8.11703	4.77724e-16	1.40978e-14
LGALS9	19.559	8.93989	30.1781	1.64923	0.238826	8.11154	4.99834e-16	1.47334e-14
FBN2	24.0751	30.8681	17.2822	-0.801677	0.0957145	-8.10207	5.40326e-16	1.59089e-14
CYP24A1	4.19361	0.840116	7.5471	2.21564	0.414096	8.08493	6.22003e-16	1.82928e-14
MAOA	23.4987	15.4815	31.5159	0.980296	0.130537	8.0748	6.75885e-16	1.98549e-14
DYNLT1	255.091	190.088	320.094	0.748756	0.110367	8.06984	7.03893e-16	2.06542e-14
PDK1	13.972	7.62519	20.3188	1.3055	0.152862	8.06848	7.11784e-16	2.0862e-14
KLHDC7B	1.47628	0.0374385	2.91512	1.91603	0.792081	8.06334	7.42349e-16	2.17332e-14
PDIA3	445.052	362.671	527.432	0.539082	0.0815248	8.06299	7.44525e-16	2.17723e-14
AL049629.2	18.699	4.7861	32.612	2.53831	0.367113	8.05818	7.74419e-16	2.25946e-14
RMND5A	47.9398	58.6412	37.2384	-0.641287	0.101042	-8.05807	7.75056e-16	2.25946e-14
TMPRSS11E	2.56108	4.97523	0.146936	-2.38121	0.616836	-8.05804	7.75266e-16	2.25946e-14
PARP10	10.9273	5.14001	16.7145	1.52862	0.223975	8.05583	7.89418e-16	2.29811e-14
PFKP	238.034	173.962	302.106	0.792787	0.0948917	8.05039	8.25298e-16	2.39986e-14
TOP2A	155.78	197.075	114.484	-0.778354	0.0808683	-8.04294	8.77066e-16	2.54753e-14
HLA-DRB5	5.00665	0.0606085	9.95269	3.36832	0.929411	8.03923	9.04039e-16	2.62293e-14
BCAM	49.6701	65.7931	33.5472	-0.95113	0.115639	-8.02693	9.99404e-16	2.89637e-14
CERS6	14.2714	19.395	9.14786	-1.00704	0.122302	-8.02127	1.04658e-15	3.02968e-14
CFAP57	5.69269	3.01959	8.36579	1.22035	0.22665	8.01347	1.11512e-15	3.2245e-14
MITF	16.3516	22.7705	9.93284	-1.1205	0.182566	-8.01323	1.11732e-15	3.22724e-14
LMNB1	119.913	153.831	85.9963	-0.831665	0.0955424	-8.01027	1.14453e-15	3.30214e-14
TAOK3	64.4857	49.0765	79.8949	0.691914	0.102396	8.00788	1.16703e-15	3.36332e-14
PPFIBP2	9.21967	15.046	3.39333	-1.86883	0.284159	-8.00646	1.18061e-15	3.39866e-14
DLX5	4.05204	7.9543	0.149777	-2.96123	0.700879	-8.00607	1.18432e-15	3.40553e-14
CREB1	70.0535	49.1283	90.9787	0.875674	0.115296	7.98844	1.36662e-15	3.92539e-14
RIPK4	24.4995	33.5331	15.4659	-1.0685	0.126272	-7.98824	1.36884e-15	3.92739e-14
SELENOS	78.4741	53.7058	103.243	0.930179	0.131232	7.98631	1.39036e-15	3.98472e-14
SKP2	41.7811	56.6773	26.8849	-1.04852	0.115265	-7.98181	1.44205e-15	4.1283e-14
HERC3	17.8641	9.71269	26.0156	1.33447	0.156683	7.98084	1.4534e-15	4.15619e-14
SHMT1	49.5202	66.9174	32.123	-1.03595	0.121539	-7.97748	1.49356e-15	4.2663e-14
BTG3	41.8726	27.2313	56.5138	1.02661	0.153867	7.9767	1.50293e-15	4.28832e-14
AMPD3	16.8975	9.83878	23.9563	1.2032	0.176302	7.97272	1.55219e-15	4.424e-14
BZW1	339.796	253.488	426.103	0.746986	0.0913287	7.96832	1.60848e-15	4.57939e-14
PARP3	5.78093	1.4504	10.1115	2.18096	0.327948	7.96578	1.64182e-15	4.66917e-14
SPRY4	6.47757	3.33286	9.62228	1.2937	0.220668	7.9636	1.67099e-15	4.7469e-14
GUK1	140.214	99.6205	180.808	0.853487	0.12295	7.96205	1.69208e-15	4.80153e-14
PRRC2C	261.491	212.01	310.972	0.550495	0.0770379	7.9544	1.80004e-15	5.10227e-14
LYRM7	16.3514	21.4553	11.2476	-0.874558	0.149671	-7.95367	1.81063e-15	5.12669e-14
ANLN	268.212	331.99	204.435	-0.696797	0.0799532	-7.9528	1.82346e-15	5.15736e-14
CPEB4	5.25856	2.49682	8.02029	1.36713	0.208641	7.952	1.8353e-15	5.18518e-14
KRT1	2.96048	5.55391	0.367053	-2.26129	0.464323	-7.95077	1.85351e-15	5.23091e-14
AFDN	74.5088	57.2604	91.7572	0.670944	0.0933543	7.9456	1.93254e-15	5.448e-14
NRIP1	34.925	26.3795	43.4705	0.699753	0.111414	7.93972	2.02641e-15	5.7064e-14
FNDC3B	50.917	40.3712	61.4629	0.594374	0.0987859	7.93954	2.02936e-15	5.7085e-14
RASGRP3	7.83972	3.83779	11.8416	1.40841	0.332844	7.93871	2.04296e-15	5.74049e-14
CDK1	147.443	190.501	104.385	-0.861689	0.0973867	-7.93314	2.13677e-15	5.99758e-14
CARHSP1	78.1925	47.8718	108.513	1.16403	0.132562	7.92906	2.20814e-15	6.19117e-14
CRABP2	114.942	158.558	71.3257	-1.1415	0.132967	-7.91111	2.55098e-15	7.14468e-14
PAM	73.6732	53.8327	93.5138	0.785488	0.10888	7.91069	2.55976e-15	7.16152e-14
KLF4	50.3027	15.8155	84.79	2.35102	0.319133	7.91038	2.56601e-15	7.17122e-14
SNX10	26.2072	16.1706	36.2438	1.11706	0.160797	7.90205	2.74356e-15	7.65916e-14
PTGES3P1	16.572	0.329609	32.8143	4.66856	0.861574	7.89662	2.86579e-15	7.99176e-14
S100A2	1544.75	1241.32	1848.19	0.573862	0.0901644	7.89098	2.99812e-15	8.35176e-14
EXO1	55.5664	74.534	36.5988	-1.00644	0.115183	-7.88383	3.17502e-15	8.83502e-14
CHD2	154.393	137.316	171.471	0.318386	0.0914999	7.87476	3.41385e-15	9.4894e-14
SEMA3D	29.8849	40.1752	19.5946	-0.999511	0.114855	-7.85869	3.88162e-15	1.07781e-13
BDKRB2	12.5016	8.05185	16.9514	0.987812	0.146381	7.85442	4.01636e-15	1.11402e-13
LRRC8C	14.2896	10.0161	18.5632	0.828529	0.124432	7.8486	4.20707e-15	1.16567e-13
FAM168B	44.9019	57.7724	32.0316	-0.831293	0.0982567	-7.84529	4.31965e-15	1.19558e-13
MALT1	31.9993	25.0554	38.9432	0.616369	0.10727	7.84228	4.42454e-15	1.2233e-13
DGKG	13.5177	6.54271	20.4927	1.51069	0.191086	7.84015	4.50012e-15	1.24287e-13
BAZ2A	118.126	93.3371	142.915	0.609321	0.0881732	7.83043	4.86189e-15	1.34135e-13
PLOD2	47.694	34.0091	61.3788	0.833326	0.112833	7.83022	4.87028e-15	1.34224e-13
HIST1H3C	132.645	204.179	61.1112	-1.72396	0.205438	-7.82753	4.97528e-15	1.36971e-13
KRT8	874.459	684.303	1064.62	0.636872	0.0881468	7.81363	5.55657e-15	1.52812e-13
C18orf25	59.3015	45.3375	73.2654	0.68051	0.0953435	7.80983	5.72648e-15	1.57317e-13
ARF3	215.873	162.859	268.886	0.719891	0.0889414	7.80886	5.77058e-15	1.5836e-13
BUB1B	55.4202	71.2217	39.6187	-0.830288	0.108124	-7.80397	5.99914e-15	1.64458e-13
ZC3H12A	15.0987	8.22793	21.9695	1.31564	0.192802	7.80038	6.17203e-15	1.69018e-13
GADD45B	31.0071	18.1176	43.8967	1.23171	0.179447	7.79982	6.19958e-15	1.69593e-13
RAB24	11.6581	4.60649	18.7096	1.81373	0.26657	7.79497	6.44238e-15	1.76049e-13
TNFAIP2	82.0281	56.2933	107.763	0.924751	0.123008	7.78779	6.81913e-15	1.86147e-13
RTKN	77.3881	57.7289	97.0473	0.739406	0.120467	7.78593	6.9205e-15	1.88715e-13
SCARF1	3.16765	0.555272	5.78002	2.12412	0.404566	7.78169	7.15641e-15	1.94942e-13
MYH9	217.904	178.47	257.337	0.525508	0.086767	7.78069	7.2129e-15	1.96274e-13
FAM111A	72.2966	54.0178	90.5754	0.735061	0.0955658	7.77246	7.69765e-15	2.09245e-13
TSC22D2	60.0561	39.3329	80.7793	1.01978	0.126693	7.76937	7.8875e-15	2.1418e-13
FAM46A	6.19	3.55611	8.8239	1.10849	0.178812	7.76556	8.12878e-15	2.20501e-13
ANKLE2	97.9823	75.7776	120.187	0.658477	0.0937495	7.74613	9.47384e-15	2.56717e-13
RARS	220.693	173.742	267.644	0.620469	0.0883504	7.73391	1.04293e-14	2.82312e-13
ROCK2	47.4328	35.6733	59.1924	0.714853	0.103448	7.7282	1.09074e-14	2.94945e-13
ADGRE5	21.2944	13.7334	28.8554	1.0189	0.173012	7.72233	1.14224e-14	3.08548e-13
MYBL2	50.9534	67.5947	34.3122	-0.957931	0.112432	-7.71265	1.23234e-14	3.32538e-13
SEPHS2	61.7814	45.5375	78.0253	0.763921	0.11557	7.7097	1.26109e-14	3.39942e-13
RASA2	21.2297	15.3095	27.15	0.78742	0.141072	7.70165	1.34319e-14	3.61696e-13
WDR34	40.3021	56.3366	24.2675	-1.18217	0.144215	-7.69331	1.43379e-14	3.85692e-13
TMTC2	8.03522	4.84274	11.2277	1.06544	0.172782	7.69216	1.44668e-14	3.88754e-13
PSMA2	503.994	402.791	605.196	0.586174	0.0871121	7.69073	1.46299e-14	3.92729e-13
HAS2	4.72067	2.29738	7.14395	1.30441	0.226836	7.68939	1.47842e-14	3.9646e-13
COQ10B	29.0699	19.9443	38.1956	0.904137	0.149245	7.68469	1.5337e-14	4.10858e-13
GOLGA7B	3.0704	1.36868	4.77213	1.28502	0.240051	7.68426	1.53879e-14	4.11793e-13
HELB	8.44598	4.94086	11.9511	1.12433	0.137021	7.67784	1.61796e-14	4.32532e-13
LRRK1	84.9089	72.3027	97.515	0.426477	0.0796571	7.67736	1.62399e-14	4.33696e-13
PCDH7	41.2694	32.4405	50.0984	0.61168	0.101447	7.67649	1.63508e-14	4.36207e-13
PLSCR4	13.076	7.59762	18.5543	1.18548	0.186482	7.66743	1.75471e-14	4.67563e-13
SUCO	78.5361	65.4248	91.6474	0.48003	0.100701	7.66732	1.75623e-14	4.67563e-13
FOXN1	2.20378	4.15125	0.256315	-2.03573	0.488263	-7.66354	1.80871e-14	4.81038e-13
TNFRSF14	7.58393	2.7662	12.4017	1.83123	0.292744	7.65313	1.96149e-14	5.21135e-13
FEM1C	23.3521	17.3505	29.3536	0.726051	0.113834	7.64987	2.01181e-14	5.33955e-13
ANK1	1.66342	2.77106	0.555789	-1.27732	0.317176	-7.63962	2.17871e-14	5.7766e-13
TAX1BP1	191.963	156.065	227.861	0.543105	0.0870468	7.63515	2.2556e-14	5.97432e-13
NUDT3	7.37453	10.2285	4.52053	-1.02429	0.140137	-7.63296	2.2943e-14	6.07062e-13
NFE2L2	116.052	92.605	139.499	0.585897	0.100258	7.63229	2.30619e-14	6.09584e-13
FLOT2	43.1876	30.5119	55.8633	0.8516	0.13443	7.63014	2.34505e-14	6.19222e-13
DENND4A	23.781	17.1751	30.3869	0.788199	0.112834	7.62441	2.4516e-14	6.46039e-13
ERP44	56.9398	45.2867	68.593	0.588343	0.0931722	7.62423	2.45496e-14	6.46266e-13
PAICS	118.208	148.761	87.656	-0.756366	0.092838	-7.61582	2.62027e-14	6.89079e-13
SPHK1	27.4156	17.5426	37.2886	1.04607	0.167324	7.60792	2.78544e-14	7.31772e-13
VAMP8	246.94	186.054	307.827	0.723342	0.11219	7.60211	2.91348e-14	7.64633e-13
SLC8B1	35.2381	23.3026	47.1735	0.987125	0.143902	7.60064	2.9468e-14	7.72593e-13
HLA-DMB	3.33553	0.0937455	6.57731	2.79241	0.773882	7.60018	2.95712e-14	7.74515e-13
LAMC1	271.79	317.03	226.55	-0.482976	0.0799592	-7.58822	3.24327e-14	8.48601e-13
LRRN2	1.1056	0.193192	2.01801	1.33877	0.489249	7.58563	3.30884e-14	8.64882e-13
TMEM154	66.7758	51.5438	82.0078	0.659728	0.101749	7.58429	3.34325e-14	8.72993e-13
ARHGEF5	22.5578	17.0758	28.0399	0.683977	0.12081	7.58334	3.3677e-14	8.7849e-13
EHD4	26.4479	20.1061	32.7897	0.678924	0.111634	7.57369	3.62757e-14	9.45326e-13
RALB	114.798	91.6691	137.928	0.584172	0.0973772	7.57096	3.70466e-14	9.64442e-13
FKBP15	65.374	53.5276	77.2203	0.520557	0.0941224	7.57082	3.70885e-14	9.64562e-13
CSNK1G1	34.3197	26.3343	42.3052	0.663828	0.105023	7.56813	3.78639e-14	9.83738e-13
KRT16	11.3231	4.61475	18.0315	1.76109	0.287013	7.5673	3.81071e-14	9.89064e-13
CTDSP2	79.4644	60.6902	98.2387	0.685862	0.10353	7.56606	3.84716e-14	9.97521e-13
RPSAP52	31.8108	17.5766	46.0451	1.34056	0.203126	7.55641	4.14337e-14	1.07325e-12
NFKB1	52.4526	40.2108	64.6943	0.672746	0.107851	7.5557	4.16607e-14	1.07805e-12
RB1	71.9128	57.3048	86.5208	0.58601	0.0919062	7.54985	4.35752e-14	1.12646e-12
NXT2	22.1884	14.5857	29.791	0.982288	0.1559	7.54569	4.49886e-14	1.16184e-12
MMP9	1.70511	0.157216	3.25299	1.87782	0.593873	7.54545	4.50726e-14	1.16285e-12
PAPD5	20.1674	14.4491	25.8858	0.799322	0.124797	7.53814	4.76716e-14	1.22867e-12
ITPR3	30.8929	24.4637	37.3221	0.589735	0.0956751	7.52625	5.22167e-14	1.34448e-12
ARHGEF35	24.8626	16.7642	32.9611	0.93491	0.144762	7.52536	5.25753e-14	1.35236e-12
ITGB1	458.102	371.475	544.73	0.551042	0.0779816	7.52245	5.37596e-14	1.38145e-12
IFITM2	215.832	104.687	326.978	1.63381	0.156158	7.51725	5.59403e-14	1.43606e-12
CIT	41.6942	53.9494	29.4389	-0.852184	0.10218	-7.51705	5.60269e-14	1.43686e-12
PPP1R12A	114	86.807	141.194	0.695448	0.0917672	7.51562	5.6643e-14	1.45122e-12
AC137936.2	7.55135	1.51141	13.5913	2.53854	0.444467	7.51436	5.71896e-14	1.46377e-12
SRFBP1	32.4894	21.899	43.0797	0.94483	0.133613	7.50938	5.94084e-14	1.51906e-12
ZC3H7B	22.4034	16.5674	28.2394	0.735017	0.116923	7.5077	6.0175e-14	1.53714e-12
TKT	196.375	247.59	145.159	-0.766232	0.0931965	-7.50704	6.04784e-14	1.54336e-12
RASSF3	38.3454	29.033	47.6578	0.696121	0.115518	7.50678	6.05981e-14	1.54489e-12
HRK	8.18449	12.221	4.14794	-1.36077	0.257772	-7.50493	6.14608e-14	1.56534e-12
TRAP1	122.778	153.81	91.7455	-0.73915	0.102018	-7.50211	6.28002e-14	1.59788e-12
BMPR2	24.6568	19.2056	30.108	0.622533	0.103297	7.50176	6.29676e-14	1.60056e-12
ZBTB10	3.52449	1.55208	5.4969	1.34807	0.243652	7.50072	6.34675e-14	1.61169e-12
BCR	96.8859	75.2197	118.552	0.649402	0.101608	7.49704	6.52727e-14	1.6559e-12
SOX9	23.504	15.4733	31.5347	0.981847	0.151523	7.49165	6.80106e-14	1.72367e-12
WASHC2A	74.415	58.4825	90.3475	0.618901	0.106187	7.48484	7.16332e-14	1.8137e-12
DHRS3	48.0004	66.1642	29.8366	-1.12305	0.138496	-7.48139	7.35381e-14	1.86011e-12
FAM177A1	75.2941	51.4746	99.1136	0.931948	0.136477	7.47449	7.75063e-14	1.95857e-12
SDC1	87.4561	111.805	63.1068	-0.815288	0.0979766	-7.47307	7.83448e-14	1.97782e-12
MRPL24	131.214	179.736	82.6924	-1.11071	0.134235	-7.47095	7.96179e-14	2.008e-12
BOD1L1	21.2539	16.4746	26.0333	0.629478	0.106166	7.4615	8.55435e-14	2.15535e-12
CR1L	7.28124	0.176382	14.3861	3.7092	0.816826	7.4562	8.90539e-14	2.24161e-12
CCDC71L	15.1131	9.00399	21.2223	1.15143	0.177126	7.44955	9.36557e-14	2.35515e-12
STAC	33.1847	45.9936	20.3758	-1.13649	0.144276	-7.44498	9.69578e-14	2.43582e-12
GADD45A	73.1637	49.3513	96.9762	0.960402	0.146393	7.44346	9.80845e-14	2.46173e-12
PGK1	362.736	294.458	431.014	0.548127	0.0860996	7.43505	1.0453e-13	2.62096e-12
LIG4	11.4302	7.34529	15.5152	0.984756	0.158717	7.42968	1.08863e-13	2.72696e-12
STK3	74.5648	58.3421	90.7875	0.629242	0.107248	7.42584	1.12063e-13	2.80439e-12
RXRA	41.4466	52.8606	30.0326	-0.795447	0.0993721	-7.41724	1.19585e-13	2.98975e-12
ATP5MC2	130.22	181.381	79.0595	-1.18781	0.143273	-7.41673	1.20047e-13	2.99838e-12
STAT5A	2.21737	0.5937	3.84104	1.60294	0.480155	7.41374	1.22786e-13	3.06385e-12
AP1S3	79.9342	109.227	50.6419	-1.09386	0.136097	-7.41247	1.23966e-13	3.0903e-12
GLS	137.756	109.813	165.699	0.589118	0.102758	7.40693	1.29254e-13	3.21902e-12
MYH15	1.97353	0.542058	3.40499	1.51428	0.339305	7.40457	1.3158e-13	3.27381e-12
HNRNPA0	18.7385	24.2613	13.2157	-0.829449	0.103637	-7.39909	1.37117e-13	3.40829e-12
TBK1	54.215	40.0717	68.3584	0.755926	0.113517	7.39636	1.39968e-13	3.4758e-12
NOTCH3	3.68293	4.71652	2.64934	-0.647504	0.262837	-7.39227	1.44338e-13	3.58089e-12
UVRAG	38.2393	25.7874	50.6912	0.948361	0.133449	7.39147	1.45214e-13	3.59916e-12
DYNC1H1	316.626	252.881	380.372	0.587049	0.0844786	7.38975	1.47101e-13	3.64244e-12
MDGA1	18.3783	10.696	26.0605	1.21018	0.183392	7.38925	1.47655e-13	3.65267e-12
SLC25A37	33.5815	24.7487	42.4143	0.753669	0.119521	7.3883	1.48714e-13	3.67401e-12
IL18R1	8.58582	4.12894	13.0427	1.45309	0.322902	7.38822	1.48802e-13	3.67401e-12
SMURF1	39.026	30.3915	47.6604	0.632374	0.105668	7.38322	1.54508e-13	3.81125e-12
LAPTM4B	79.5358	102.198	56.8742	-0.834418	0.099445	-7.37814	1.60512e-13	3.95558e-12
CLIP4	106.552	87.7807	125.323	0.508793	0.10243	7.37506	1.64273e-13	4.0444e-12
EIF5A2	15.394	9.78805	21	1.02807	0.172738	7.37325	1.66523e-13	4.0959e-12
H2AFV	236.172	292.339	180.005	-0.696537	0.101838	-7.36722	1.74223e-13	4.28121e-12
HIST1H2BB	81.7031	133.499	29.9072	-2.12158	0.27489	-7.36619	1.75573e-13	4.31029e-12
RECQL	78.6432	62.5613	94.725	0.590746	0.105356	7.36161	1.81707e-13	4.45664e-12
SPINK5	26.6908	37.854	15.5275	-1.23319	0.168397	-7.36087	1.82719e-13	4.47722e-12
GSKIP	27.3614	17.6207	37.1021	1.03297	0.155174	7.35484	1.91159e-13	4.67959e-12
STON2	46.4982	62.0881	30.9082	-0.983441	0.118308	-7.34769	2.01665e-13	4.92746e-12
USP13	5.48069	8.47641	2.48496	-1.4432	0.216537	-7.34597	2.0428e-13	4.98663e-12
PDIA6	189.708	156.494	222.923	0.507707	0.0862957	7.34579	2.0455e-13	4.9885e-12
GGCT	305.659	389.209	222.108	-0.806502	0.0923854	-7.34542	2.05114e-13	4.99754e-12
PDIA4	155.831	126.854	184.807	0.539308	0.0899327	7.34472	2.06194e-13	5.01914e-12
ISY1-RAB43	10.2073	6.63682	13.7779	0.952392	0.158691	7.34447	2.06569e-13	5.02354e-12
BAK1	23.4195	15.1712	31.6678	1.01444	0.159262	7.34123	2.1164e-13	5.142e-12
ADAMTS6	8.59359	5.71308	11.4741	0.893889	0.209471	7.33612	2.19869e-13	5.33692e-12
CCNG2	19.036	12.1578	25.9142	1.03245	0.163052	7.33248	2.25939e-13	5.47912e-12
ANP32A	224.45	277.839	171.06	-0.696516	0.100985	-7.32694	2.3546e-13	5.70466e-12
CAT	38.2032	52.0508	24.3556	-1.06507	0.133858	-7.31764	2.52363e-13	6.10846e-12
CCNF	20.9207	28.175	13.6664	-0.992218	0.127588	-7.30963	2.67873e-13	6.47781e-12
TNS3	59.4742	78.1582	40.7903	-0.92157	0.100253	-7.30356	2.80251e-13	6.7708e-12
EPB41L2	91.241	70.8645	111.618	0.648081	0.0976703	7.30229	2.82919e-13	6.82889e-12
PLEK2	53.0677	33.9605	72.1749	1.06563	0.162487	7.29868	2.90614e-13	7.00808e-12
AL390728.4	82.1299	58.7724	105.487	0.833134	0.140637	7.29712	2.93996e-13	7.08302e-12
IARS	267.188	327.626	206.749	-0.661605	0.0846711	-7.29472	2.99289e-13	7.20384e-12
ANXA5	240.365	195.081	285.649	0.547833	0.0898896	7.29086	3.0798e-13	7.40612e-12
FOXN2	31.5685	23.9868	39.1502	0.684241	0.124052	7.28039	3.32869e-13	7.9972e-12
FAM83B	41.2992	31.528	51.0703	0.67878	0.111196	7.27052	3.58098e-13	8.59536e-12
TANK	76.9248	59.1915	94.6581	0.668327	0.136947	7.25115	4.13235e-13	9.90959e-12
MYLK	13.8013	20.1902	7.41235	-1.33282	0.151613	-7.24741	4.24815e-13	1.01778e-11
RNF169	26.8094	21.3752	32.2436	0.571176	0.0971107	7.24556	4.30647e-13	1.0308e-11
[truncated: 23,958 more rows]
