# Supplementary material
Source: Research Square preprint supplement (doi:10.21203/rs.3.rs-9531266/v1)
Supplement: Supplementary file 1 [file 570653f29e9b2498f2f6b031.docx]

**Supplementary Tables:**

The Supplementary Tables contain the details of the transcriptome datasets used for rea-analysis in this study, critical small molecules and chemicals with the concentration that are used in this study, antibodies used in the study with their dilutions, the sequences of the primer, siRNAs and the patient characteristics.

**Supplementary Table 1:** Details of the transcriptome data sets used in this study

| **GSE number** | **Disease** | **Case numbers** | **Analyzed for** | **Figure No.** | **Reference** |
| --- | --- | --- | --- | --- | --- |
| GSE98774 | Actinic Keratosis | Healthy-7, Patients-7 | Case vs control | Suppl. Fig. 1a-b | unpublished |
| GSE28315 | Epidermolysis Bullosa | Healthy-7, Patients-7 | Case vs control | Suppl. Fig. 1a-b | Hum Genet 2012 Mar;131(3):393-406. |
| GSE65127 | Vitiligo | Healthy-10, Patients-10 | Case vs control | Suppl. Fig. 1a-b | J Invest Dermatol 2015 Dec;135(12):3105-3114. |
| GSE108640 | Ichthyosis | Healthy-14, Patients-20 | Case vs control | Suppl. Fig. 1a-b | J Allergy Clin Immunol 2019 Feb;143(2):604-618 |
| GSE65914 | Erythematotelangiectatic Rosacea | Healthy-20, Patients-14 | Case vs control | Suppl. Fig. 1a-b | J Invest Dermatol 2015 Sep;135(9):2198-2208. |
| GSE95474 | Subacute Cutaneous Lupus Erythematosus | Healthy-5, Patients-5 | Case vs control | Suppl. Fig. 1a-b | J Invest Dermatol 2017 Jul;137(7):1484-1492. |
| GSE109248 | Acute Cutaneous Lupus Erythematosus | Healthy-14, Patients-7 | Case vs control | Suppl. Fig. 1a-b | J Clin Invest 2018 Jul 2;128(7):2966-2978 |
| GSE109248 | Chronic Cutaneous Lupus Erythematosus | Healthy-14, Patients-6 | Case vs control | Suppl. Fig. 1a-b | J Clin Invest 2018 Jul 2;128(7):2966-2978 |
| GSE95474 | Chronic Discoid Lupus Erythematosus | Healthy-5, Patients-6 | Case vs control | Suppl. Fig. 1a-b | J Invest Dermatol 2017 Jul;137(7):1484-1492. |
| GSE65914 | Phymatous Rosacea | Healthy-20, Patients-12 | Case vs control | Suppl. Fig. 1a-b | J Invest Dermatol 2015 Sep;135(9):2198-2208. |
| GSE65914 | Papulopustular Rosacea | Healthy-20, Patients-12 | Case vs control | Suppl. Fig. 1a-b | J Invest Dermatol 2015 Sep;135(9):2198-2208. |
| GSE53795 | Acne vulguris | Healthy-12, Patients-12 | Case vs control | Suppl. Fig. 1a-b | J Invest Dermatol 2015 Sep;135(9):2198-2208. |
| GSE148027 | Hidradentis Suppurativa | Healthy-8, Patients-18 | Case vs control | Suppl. Fig. 1a-b | J Invest Dermatol 2020 Dec;140(12):2421-2432.e10. |
| GSE32887 | Sarcoidosis | Healthy-5, Patients-15 | Case vs control | Suppl. Fig. 1a-b | J Am Acad Dermatol 2012 Jun;66(6):901-10, 910.e1-2 |
| GSE107361 | Atopic Dermatitis | Healthy-29, Patients-39 | Case vs control | Suppl. Fig. 1a-c | J Allergy Clin Immunol 2018 Jun;141(6):2094-2106. |
| GSE130403 | Lichen planus | Healthy-12, Patients-21 | Case vs control | Suppl. Fig. 1a-c | Sci Transl Med 2019 Sep 25;11(511) |
| GSE13355 | Psoriasis | Healthy-64, Patients-58 | Case vs control | Suppl. Fig. 1a-c, Fig. 1a and c | Nat Genet 2009 Feb;41(2):199-204. |
| GSE30999 | Psoriasis | Healthy-85, Patients-85 | Case vs control | Fig. 1b and c | J Invest Dermatol 2017 Feb;137(2):305-312. |
| GSE117239 | Psoriasis | Healthy-85, Patients-89 | Case vs control | Fig. 1c | J Allergy Clin Immunol 2019 May;143(5):1965-1969. |
| GSE54456 | Psoriasis | Healthy-82, Patients-92 | Case vs control | Fig. 1c | J Invest Dermatol 2014 Jul;134(7):1828-1838. |
| GSE14905 | Psoriasis | Healthy-21, Patients-33 | Case vs control | Fig. 1c | PLoS One 2008 Jul 16;3(7):e2737. |
| GSE41664 | Psoriasis | 38 each from lesional and non-lesional | Lesion over Non lesion | Fig. 1c | PLoS One 2013;8(1):e52242. |
| GSE53552 | Psoriasis | 25 from lesional and 24 non-lesional | Lesion over Non lesion | Fig. 1c | J Immunol 2014 Apr 15;192(8):3828-36. |
| GSE153007 | Psoriasis | Healthy-5, Patients-28 | Case vs control | Fig. 1c | J Allergy Clin Immunol 2012 Dec;130(6):1335-43.e5. |
| GSE41662 | Psoriasis | Healthy-24, Patients-24 | Lesion over Non lesion | Fig. 1c | PLoS One 2013;8(1):e52242. |
| GSE121212 | Psoriasis | Healthy-38, Patients-28 | Case vs control | Fig. 1c | J Invest Dermatol 2019 Jul;139(7):1480-1489. |
| GSE34248 | Psoriasis | 14 from lesional and 14 non-lesional | Lesion over Non lesion | Fig. 1c | PLoS One 2013;8(1):e52242. |
| GSE244679 | Psoriasis | 24 from lesional and 24 non-lesional | Lesion over Non lesion | Fig. 1d | Not accesible to public |
| GSE67853 | Psoriasis | 7 each from Small and 7 intermediate lesions | Lesion over Non lesion | Fig. 1e | J Invest Dermatol 2016 Jan;136(1):161-172. |
| GSE78097 | Psoriasis | 7 each from Small and 13 intermediate lesions | Lesion over Non lesion | Fig. 1e | J Invest Dermatol 2016 Nov;136(11):2173-2182. |
| GSE162183 | Psoriasis | Single cell RNA-Seq (n=3 controls and patients) | Case vs control | Suppl. Fig. 2 and Fig. 7a | Cell Death Dis 2021 May 6;12(5):450. |
| GSE20297 | HaCaT cells with IFNγ and TNFα | 3 replicate each for untreated and stimulated, 24 h | unstim vs stim | Fig. 2a, Suppl. Fig. 4a-b | Unpublished |
| GSE277914 | HaCaT cells with IFNγ and TNFα | 3 replicate each for untreated and stimulated, 48 h | unstim vs stim | Suppl. Fig. 4a-c | Stem Cell Res Ther 2025 May 14;16(1):243. |
| GSE7216 | HaCaT cells with IL19, IL20, IL22 | 3 replicate each for untreated and stimulated, 24 h | unstim vs stim | Fig.2a, Suppl. Fig. 7b | J Immunol 2007 Feb 15;178(4):2229-40. |
| GSE37361 | HaCaT cells with M5 | 2 replicate for controls and 3 stimulated, 24 h | unstim vs stim | Fig.2a, Suppl. Fig. 7b | Unpublished |
| GSE203409 | HaCaT cells with IFNγ, IL4 and IL13 | 3 replicate for controls and 6 stimulated, 24 h | unstim vs stim | Fig.2a, Suppl. Fig. 7b | Front Immunol 2022;13:884530 |
| GSE36287 | Primary keratinocytes with IFNγ, TNFα, IL17A, IL13, | 6 replicate for controls and 3 stimulated, 24 h | unstim vs stim | Fig.2a, Suppl. Fig. 7b | PLoS One 2012;7(3):e34594. |
| GSE117468 | Psoriasis (Brodalumab) | Before treatment-39, After treatment-23 | Before t/t vs after t/t | Suppl. Fig. 8a | J Allergy Clin Immunol 2020 Mar;145(3):922-932. |
| GSE106992 | Psoriasis (Ustekinumab) | Before treatment-39, After treatment-23 | Before t/t vs after t/t | Suppl. Fig. 8a | J Allergy Clin Immunol 2019 May;143(5):1965-1969. |
| GSE201827 | Psoriasis (Secukinumab) | Before treatment-65, After treatment-47 | Before t/t vs after t/t | Suppl. Fig. 8a | J Dermatol Sci 2023 Jan;109(1):12-21 |
| GSE85304 | Psoriasis (Adalimumab) | Before treatment-15, After treatment-15 | Before t/t vs after t/t | Suppl. Fig. 8a | Nature 2017 Jun 29;546(7660):662-666. |
| GSE252029 | Psoriasis (Guselkumab) | Before treatment-17, After treatment-12 | Before t/t vs after t/t | Suppl. Fig. 8a | JID Innov 2024 Sep;4(5):100287. |
| GSE69967 | Psoriasis (Tofacitinib) | Before treatment-9, After treatment-9 | Before t/t vs after t/t | Suppl. Fig. 8a | J Allergy Clin Immunol 2016 Apr;137(4):1079-1090. |
| GSE136757 | Psoriasis (PF-06700841) | Before treatment-17, After treatment-12 | Before t/t vs after t/t | Suppl. Fig. 8a | J Invest Dermatol 2020 Aug;140(8):1546-1555.e4 |
| GSE50614 | Psoriasis (SIRT2104) | Before treatment-2, After treatment-5 | Before t/t vs after t/t | Suppl. Fig. 8a | PLoS One 2015;10(11):e0142081. |

**Supplementary Table 2:** Details of the important chemicals used in the study

| **Compound name** | **Company** | **Cat no** | **Concentration used** |
| --- | --- | --- | --- |
| Dulbecco's Modified Eagle Medium | HiMedia | AL068A | - |
| Foetal Bovine Serum | Corning | 35-010-CV | 10% (v/v) |
| Penicillin-Streptamycin | HiMedia | A001 | 1% (v/v) |
| Gentamicin | HiMedia | A005 | 20 µg/mL |
| HEPES | HiMedia | TCL021 | 10 mM |
| RPMI-1640 | HiMedia | AL028 | - |
| L-Alanyl-L-Glutamine | HiMedia | TCL030 | 2 mM |
| Sodium Pyruvate | HiMedia | TCL015 | 1 mM |
| Recombinant Human IFNβ | ABclonal | RP02774 | 50 ng/mL |
| Recombinant Human IFNγ | ABclonal | RP01038 | 50 ng/mL |
| Recombinant Human IFNλ3 | ABclonal | RP00219 | 50 ng/mL |
| Recombinant Human TNFα | ABclonal | RP00993 | 50 ng/mL |
| Cycloheximide | Sisco Research Laboratories | 66-81-9 | 50µg/mL |
| Birinapant (SMAC mimetic) | BLD Pharm | 1260251-31-7 | 100 nM |
| Lipopolysaccharide (LPS),E. Coli O111:B4 | Sigma Aldrich | LPS25 | 1µg/mL |
| ATP disodium salt | Sisco Research Laboratories | 34369-07-8 | 5 mM |
| Z-VAD-FMK | BLD Pharm | 634911-81-2 | 50 µM |
| VX 765 | Apex Bio | 273404-37-8 | 50 µM |
| Ac-LEVD-CHO | Apex Bio | 402832-01-3 | 50 µM |
| Ac-YVAD-CHO | Apex Bio | 143313-51-3 | 50 µM |
| Z-DEVD | Apex Bio | 210344-95-9 | 50 µM |
| Z-IETD | Apex Bio | 210344-98-2 | 50 µM |
| Nec-1 | Apex Bio | 4311-88-0 | 50 µM |
| Upadacitinib | BLD Pharm | 1310726-60-3 | 1 µM |
| Baricitinib | MedChemExpress | 1187594-09-7 | 3 µM |
| Thiazolyl Blue Tetrazolium Bromide (MTT) | Sisco Research Laboratories | 298-93-1 | 0.5 mg/mL |
| Dimethyl Sulphoxide | HiMedia | MB058 | - |
| DAPI dihydrochloride | HiMedia | MB097 | 1 ug/mL |
| GSK872 | BLD Pharm | 2703752-81-0 | 5 µM |
| Necrosulfonamide | MedChemExpress | 1360614-48-7 | 5 µM |
| Bay11-7082 | Apex Bio | 19542-67-7 | 3 µM |
| TRIzol | Ambion | 15596018 | - |
| ABScript II cDNA First-Strand Synthesis Kit | ABclonal | RK20400 | - |
| Genious 2X SYBR Green Fast qPCR Mix | ABclonal | RK21204 | - |
| Tris EDTA | Sigma Aldrich | 93302 |  |
| DPBS | Sigma Aldrich | D5652 | - |
| Apoptosis-necrosis assay kit | MedChemExpress | MCE CAT-HY-K1070 | - |
| Zombie Red™ Fixable Viability Kit | Biolegend | 423109 | - |
| BCA protein assay kit | Takara | T9300A | - |
| Protease and Phosphatase Inhibitor cocktail | Sigma Aldrich | PPC1010-1ML | - |
| siRNA transfection reagent | MedChemExpress | HY-K2017 | - |
| Aminogualidine | BLD Pharm | BD113987 | 0.5 mM |
| L-NAME Dihydrochloride | Cayman Chemical | 80210 | 5 µM |
| Sulphanilamide | Sisco Research Laboratories | 65404 | - |
| N-1-NAPHTHYL ETHYLENE DIAMINE DIHYDROCHLORIDE | Loba chemie | 04805 | - |

**Supplementary Table 3:** Details of the antibodies and dilutions used in this study

| **Antibody** | **Manufacturer** | **Cat no** | **Dose** | **Application** |
| --- | --- | --- | --- | --- |
| iNOS Rabit pAb | Abcam | ab15323 | (1:250) | WB |
| PARP1 Rabbit mAb | ABclonal Inc. | A19596 | (1:1000) | WB |
| RIPK1 Rabbit pAb | ABclonal Inc. | A7414 | (1:1000) | WB |
| Phospho STAT1 (Y701) Rabbit pAb | ABclonal Inc. | AP0135 | (1:1000) | WB |
| Histone H3 Rabbit mAb | ABclonal Inc. | A22348 | (1:5000) | WB |
| GAPDH Rabbit pAb | ABclonal Inc. | AC027 | (1:1000) | WB |
| GAPDH Mouse mAb | ABclonal Inc. | AC002 | (1:1000) | WB |
| β-actin Rabbit mAb | ABclonal Inc. | AC026 | (1:10000) | WB |
| Claudin 1 Rabbit mAb | ABclonal Inc. | A25902 | (1:2500) | WB |
| ZO-1 Rabbit pAb | ABclonal Inc. | A0659 | (1:2500) | WB |
| LORICRIN Rabbit pAb | ABclonal Inc. | A21039 | (1:1000) | WB |
| Occluddin Rabbit pAb | ABclonal Inc. | A2601 | (1:2500) | WB |
| Involucrin Rabbit mAb | ABclonal Inc. | A13311 | (1:1000) | WB |
| FLG Rabbit pAb | ABclonal Inc. | A20011 | (1:1000) | WB |
| Caspase 8 Mouse mAb | Cell Signalling Technologies | 9746 | (1:1000) | WB |
| Caspase 9 Rabbit pAb | Cell Signalling Technologies | 9502 | (1:1000) | WB |
| BID Rabbit pAb | Cell Signalling Technologies | 2002 | (1:1000) | WB |
| GSDME Rabbit pAb | Cell Signalling Technologies | 84005 | (1:1000) | WB |
| Caspase 7 Rabbit pAb | Cell Signalling Technologies | 9492 | (1:1000) | WB |
| γH2AX Rabbit mAb | Cell Signalling Technologies | 9718 | (1:1000) | WB |
| Phospho RIPK3 (S227) Rabbit mAb | Cell Signalling Technologies | 93654 | (1:500) | WB |
| RIPK3 Rabbit mAb | Cell Signalling Technologies | 13526 | (1:1000) | WB |
| Phospho MLKL (S358) Rabbit mAb | Cell Signalling Technologies | 18640 | (1:1000) | WB |
| MLKL Rabbit pAb | Cell Signalling Technologies | 14993 | (1:1000) | WB |
| ZBP-1 Rabbit pAb | ABclonal Inc. | A13899 | (1:1000) | WB |
| Caspase 1 Rabbit mAb | Cell Signalling Technologies | 3866 | (1:1000) | WB |
| GSDMD Rabbit mAb | Cell Signalling Technologies | 69469 | (1:1000) | WB |
| ASC Rabbit mAb | Cell Signalling Technologies | 78000 | (1:1000) | WB |
| STAT1 Rabbit mAb | Cell Signalling Technologies | 9172 | (1:1000) | WB |
| IRF1 Rabbit mAb | Cell Signalling Technologies | 8478 | (1:1000) | WB |
| Phospho NFkB p65 (S536) Rabbit pAb | Cell Signalling Technologies | 3033 | (1:1000) | WB |
| NINJ-1 Rabbit pAb | Invitrogen | PA-95755 | (1:500) | WB |
| Caspase 3 Mouse mAb | Santa Cruz Biotechnology | sc-56053 | (1:500) | WB |
| NFkB p65 Rabbit pAb | Santa Cruz Biotechnology | sc-109 | (1:500) | WB |
| Goat Anti-Ms HRP conjugated with Horse Radish Peroxidase | ABclonal Inc. | AS002 | (1:5000) | WB |
| Goat Anti-Rabbit conjugated with Horse Radish Peroxidase | Jackson ImmunoResearch | 111-035-003 | (1:10000) | WB |
| ABflo® 488-conjugated Goat anti-Rabbit IgG | ABclonal Inc. | AS053 | (1:700) | IF |
| ABflo® 488-conjugated Goat anti-Mouse IgG | ABclonal Inc. | AS037 | (1:700) | IF |
| ABflo® 555-conjugated Goat anti-Rabbit IgG (H+L) | ABclonal Inc. | AS058 | (1:700) | IF |
| ABflo® 555-conjugated Goat anti-Mouse IgG | ABclonal Inc. | AS057 | (1:700) | IF |
| HMGB1 Rabbit pAb | ABclonal Inc. | A2553 | (1:200) | IF |
| ZBP-1 Rabbit pAb | ABclonal Inc. | A13899 | (1:100) | IF |
| Caspase 8 Mouse mAb | Cell Signalling Technologies | 9746 | (1:200) | IF |
| MLKL Rabbit pAb | ABclonal Inc. | A5579 | (1:100) | IF |
| Caspase 1 Rabbit mAb | ABclonal Inc. | A27901 | (1:200) | IF |
| STAT1 Rabbit pAb | ABclonal Inc. | A12075 | (1:200) | IF |
| IRF1 Rabbit mAb | Cell Signalling Technologies | 8478 | (1:200) | IF |
| NFkB p65 Mouse mAb | ABclonal Inc. | A18210 | (1:100) | IF |
| NFkB p50 Mouse pAb | Santa Cruz Biotechnology | sc-8414 | (1:100) | IF |

**Supplementary Table 4:** Sequences of the primers and siRNAs used in this study

| **Target GENE** | **Sequence: Forward (5'-->3')** | **Sequence: Reverse (5'-->3')** |
| --- | --- | --- |
| Hu_CASP8 | CCTCAAGTTCCTGAGCCTGG | GCAGAAATTTGAGCCCTGCC |
| Hu_CASP7 | CTTATGTTACCCAGATGGCAGA | GGGACGGTACAAACGAGGAC |
| Hu_CFLAR | AGTGAGGCGATTTGACCTGCTC | CCTCACCAATCTCTGCCATCAG |
| Hu_CYLD | GCTGGACTGGAACTGGAAGA | GGAAACCGGCTGCAATGATG |
| Hu_AIM2 | GCCACTAAGTCAAGCTGAAATG | CAGGCTTAACATGAGGAGAGAC |
| Hu_CASP1 | ACACAAGAAGGGAGGAGAGA | CTTCACCCATGGAACGGATAA |
| Hu_CASP4 | GAATCTGACAGCCAGGGATATG | CCATGAGACATGAGTACCAAGAA |
| Hu_NINJ1 | AGTAGGACACCCAGGACCC | GGGACATGGTGCAGATGAGG |
| Hu_ZBP1 | GCAAACTCCGAAGCCATCCAGA | CCAAGTTGAGGAATCACCTGGTG |
| Hu_RIPK2 | TCCCTACCACAAACTCGCC | TTAAGACATCCTTTCTTTCACTGTC |
| Hu_RIPK3 | TGCGTCAAGTTATGGCCCAG | AGCCCCACTTCCTATGTTGC |
| Hu_MLKL | TACAGTCAGCAGAGTGCAGG | TCAAATTTTCCATGCCTTCGC |
| Hu_STAT1 | TCTGTGTCTGAAGTTCACCCTT | CAGAGCCCACTATCCGAGAC |
| Hu_IRF1 | CCTGTTTGTGGTAGTGGTTCT | TAACCTTCCACCCTCAGAAATG |
| Hu_RELA | GCTGCATCCACAGTTTCCAG | TCCCCACGCTGCTCTTCTAT |
| Hu_NFKB1 | GCTTAGGAGGGAGAGCCCA | GGTATGGGCCATCTGCTGTT |
| Hu_IL6 | CCAGGAGAAGATTCCAAAGATGTA | CGTCGAGGATGTACCGAATTT |
| Hu_TNF | CCAGGGACCTCTCTCTAATCA | TCAGCTTGAGGGTTTGCTAC |
| Hu_IL1B | CTCTCACCTCTCCTACTCACTT | TCAGAATGTGGGAGCGAATG |
| Hu_TNFAIP3 | GGCGTTCAGGACACAGAC | TTCCAGTTCCGAGTATCATAGC |
| Hu_NFKB2 | GGCCTTTGGGGACTTCTCTC | TGCACCTCTTCCTTGTCTTCC |
| Hu_TJP1 | AAGATGGGATTCTTCGGCCC | CTTGGCTGCAGGGCTATCTT |
| Hu_FLG | CGGCAAATCCTGAAGAATCCA | GTGCTTTCTGTGCTTGTGTCC |
| Hu_IVL | GCCTTACTGTGAGTCTGGTTGA | GACAGGCACCTTCTGGCAT |
| Hu_TCHH | CTTCCTCTGGTGAAGTGGGTT | GGTCATGTGGTCTCCGAAGC |
| Hu_DSG4 | CATCCCGAGGACAGGGATGT | TCAGAGGAATCCATCCGATCC |
| **siRNA Target genes** |  |  |
| CASP8 siRNA-1 | AAUAUCAUAAAGAUUUCUGCU CAGAAAUCUUUAUGAUAUUGG |  |
| CASP8 siRNA-2 | AAAAGAAACUUAAAAGACCUC GGUCUUUUAAGUUUCUUUUGC |  |
| CASP8 siRNA-3 | UCAAAAUCUCAUAGAUUUGCU CAAAUCUAUGAGAUUUUGAAA |  |
| IRF1 siRNA1 | UCACCAAGAACCAGAGAAAUU 3' UUUCUCUGGUUCUUGGUGAUU 3' |  |
| IRF1 siRNA-2 | GAAAGAAAGUCGAAGUCCAUU 3' UGGACUUCGACUUUCUUUCUU 3' |  |
| IRF1 siRNA-3 | AGAGCAAGGCCAAGAGGAAUU 3' UUCCUCUUGGCCUUGCUCUUU 3' |  |
| ZBP1 siRNA-1 | G.G.G.A.A.U.G.A.G.G.A.C.A.G.C.A.A.A.A.U.U 3' U.U.U.U.G.C.U.G.U.C.C.U.C.A.U.U.C.C.C.U.U 3 |  |
| ZBP1 siRNA-2 | U.G.G.A.A.G.A.A.G.A.G.C.A.A.A.G.U.C.A.U.U 3' U.G.A.C.U.U.U.G.C.U.C.U.U.C.U.U.C.C.A.U.U 3' |  |
| ZBP1 siRNA-3 | C.A.U.C.A.U.U.A.C.A.A.G.A.C.A.G.A.C.A.U.U 3' U.G.U.C.U.G.U.C.U.U.G.U.A.A.U.G.A.U.G.U.U 3' |  |
| siRNA Negative Control | UUCUCCGAACGUGUCACGUUU ACGUGACACGUUCGGAGAAUU |  |

**Supplementary Table 5:** Details of the patient samples used in this study

| **Characteristics** | **Validation in additional tissue cohort** |
| --- | --- |
| Number of samples | 18 |
| Mean age | 45.7 (12-70) |
| Mean age of disease onset | 39.3 (12-60) |
| Early onset (Type I) - Late onset (Type II) | 9 Type-I, 9 Type-II |
| HLA-Cw6 status | 14 Positive |
| 4 Negative |
| Sex distribution | 15 Male |
| 3 Female |
| Clinical diagnosis | Generalized Plaque type |
